# Supplementary material for: Dirhodium(ii)-catalysed cycloisomerization of azaenyne: rapid assembly of centrally and axially chiral isoindazole frameworks
Source: PubMed Central journal article supplement — Chem Sci. 2021 Sep 29;12(41):13730–6. doi: 10.1039/d1sc04961e (PMC8549790; doi:10.1039/d1sc04961e), 2021-09-29
Supplement: SC-012-D1SC04961E-s001.pdf [file SC-012-D1SC04961E-s001.pdf]

# Supplementary Information

## Dirhodium(II)-Catalyzed Cycloisomerization of Azaenyne: Rapid Assembly of Centrally and Axially Chiral Isoindazoles Frameworks

Shaotong Qiu, Xiang Gao, and Shifa Zhu<sup>\*,†,‡</sup>

<sup>†</sup>Key Lab of Functional Molecular Engineering of Guangdong Province, School of Chemistry and Chemical Engineering, South China University of Technology, Guangzhou 510640, P. R. China

[zhuf@scut.edu.cn](mailto:zhuf@scut.edu.cn)

<sup>‡</sup> Guangdong Youmei Institute of Intelligent Bio-manufacturing Co., Ltd.

### Table of content

|                                                                                                                |     |
|----------------------------------------------------------------------------------------------------------------|-----|
| 1. HPLC analysis of product <b>2m'</b> and <b>2m''</b> .....                                                   | 2   |
| 2. Proposed mechanism for central-to-axial chirality transfer of <b>4</b> to <b>5</b> .....                    | 2   |
| 3. Experimental procedures and spectroscopic data .....                                                        | 3   |
| 3.1 General information .....                                                                                  | 3   |
| 3.2 General procedure for the preparation of azaenyynes .....                                                  | 3   |
| 3.3 Procedures for initial investigation of cycloisomerization of azaenyne (imine, triazene and diazene) ..... | 15  |
| 3.4 General procedures for cycloisomerization of azaenyne <b>1</b> .....                                       | 17  |
| 3.5 General procedures for cycloisomerization of azaenyne <b>3</b> .....                                       | 26  |
| 3.6 Procedures for central-to-axial chirality transfer reaction of <b>2m</b> .....                             | 29  |
| 3.7 General procedures for central-to-axial chirality transfer reactions of <b>4</b> .....                     | 30  |
| 3.8 Procedures for late-modification of chiral isoindazoles .....                                              | 33  |
| 3.9. Reference .....                                                                                           | 38  |
| 4. X-Ray diffraction analysis .....                                                                            | 39  |
| 4.1 Crystal data and structure refinement for <b>2h</b> .....                                                  | 39  |
| 4.2 Crystal data and structure refinement for <b>4g</b> .....                                                  | 40  |
| 4.3 Crystal data and structure refinement for <b>5g</b> .....                                                  | 41  |
| 5. Copies of NMR spectrum .....                                                                                | 42  |
| 6. Data of HPLC .....                                                                                          | 149 |

## 1. HPLC analysis of product 2m' and 2m''

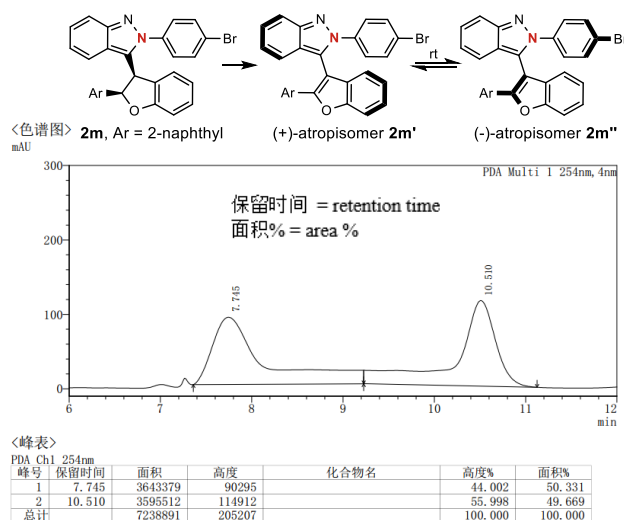

Two peaks featuring a continuing vague boundary was found via analysis of products 2m' and 2m'' by HPLC using a chiral stationary phase at room temperature, which indicated that 2m' and 2m'' were in a fast equilibrium with each other.

## 2. Proposed mechanism for central-to-axial chirality transfer of 4 to 5

It's well known that DDQ is a common oxidant for oxidative aromatization process, wherein DDQ first induced a hydride transfer assisted by long pair of heteroatom to form a stable carbocation, then followed by a  $\beta$ -proton elimination to afford the aromatization product<sup>[1]</sup>. Based on the reported literatures, we proposed the following possible mechanism for our oxidative central-to-axial chirality transfer process. As shown in Scheme 1S, centrally chiral starting material 4 first underwent hydride transfer to afford intermediate Int-A under DDQ oxidation condition. Then a fast equilibrium between Int-A and Int-A' might be established through the rotation of isoindozale group, and the intermediate Int-A' would be more stable due to less steric hindrance. In the consequent  $\beta$ -proton elimination process, path a might proceed easier than path b due to the potential  $\pi$ - $\pi$  stacking interaction between DDQH<sup>-</sup> and the capping 4-bromophenyl group of TS-B', and therefore resulted in the formation of 5 as the major enantioisomer. As for path b, the steric repulsion between the isoindozale wall and DDQH<sup>-</sup> in TS-B will slow down the corresponding transformation.

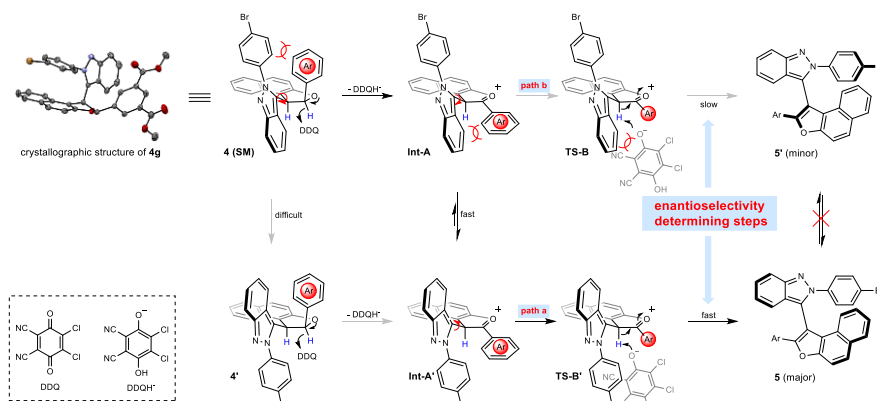

Scheme 1S Proposed mechanism for central-to-axial chirality transfer of 4 to 5

### 3. Experimental procedures and spectroscopic data

#### 3.1 General information

All reactions were carried out under an inert atmosphere of dry N<sub>2</sub> in Schlenk tube, solvents were purified by standard method. <sup>1</sup>H, <sup>13</sup>C, <sup>19</sup>F NMR spectra were recorded on a Bruker AVANCE 400 (400 MHz for <sup>1</sup>H; 101 MHz for <sup>13</sup>C; 376 MHz for <sup>19</sup>F) or Bruker AVANCE 500 (500 MHz for <sup>1</sup>H; 126 MHz for <sup>13</sup>C; 471 MHz for <sup>19</sup>F), <sup>1</sup>H NMR and <sup>13</sup>C NMR chemical shifts were determined relative to internal standard TMS at δ 0.0 and <sup>19</sup>F NMR chemical shifts were determined relative to CFC<sub>3</sub> as external standard. Chemical shifts (δ) are reported in ppm, and coupling constants (*J*) are in Hertz (Hz). The following abbreviations were used to explain the multiplicities: s = singlet, d = doublet, t = triplet, q = quartet, m = multiplet, br = broad. Infrared (IR) spectra are recorded on a Nicolet 210 spectrophotometer and were recorded in potassium bromide (KBr) pellet. Mass spectra (MS) were obtained using ESI mass spectrometer. Melting points were determined using a hot stage apparatus. All reagents were used as received from commercial sources, unless specified otherwise, or prepared as described in the literature.

#### 3.2 General procedure for the preparation of azaenyenes

##### General procedure for preparation of azaenyenes 1 and 3

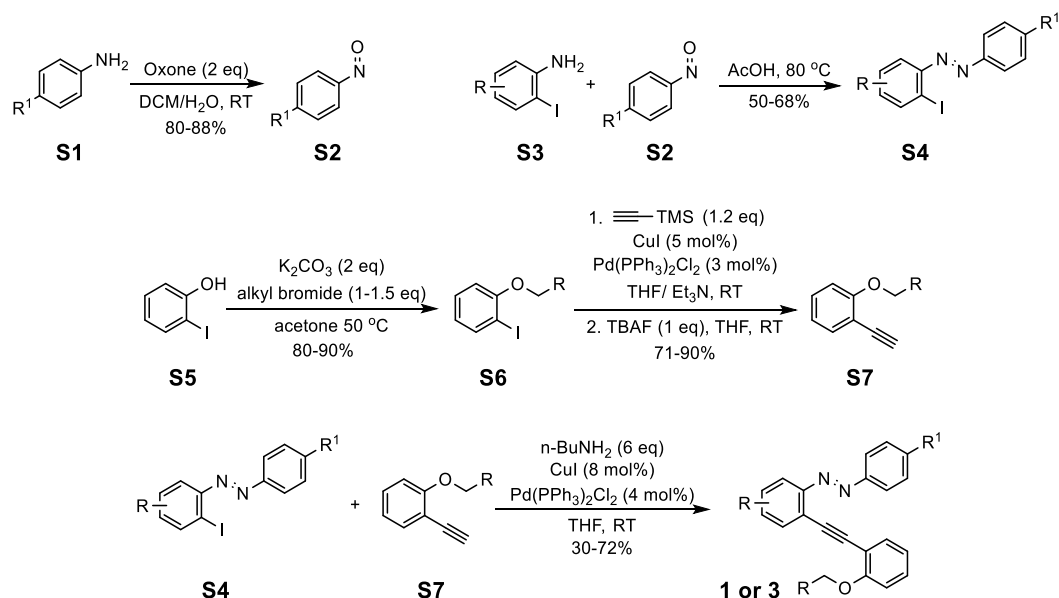

##### Typical procedure for preparation of **S2**<sup>[2]</sup>

Aniline **S1** (14.9 mmol, 1.00 equiv) was dissolved in 45 ml of DCM. To this solution Oxone (17.9 g, 29.8 mmol, 2.00 equiv) dissolved in 180 ml of water was added. The solution was stirred under nitrogen at room temperature until TLC monitoring indicated complete consumption of the starting material. After separation of the layers, the aqueous layer was extracted with DCM twice. The combined organic layers were washed with 1N HCl, saturated sodium bicarbonate solution, water,

brine and dried (magnesium sulfate). Removal of the solvent in vacuo yielded **S2**.

#### Typical procedure for preparation of **S4**<sup>[3]</sup>

Substituted nitrosobenzene **S2** (1.0 equiv) was added to the substituted iodinated aniline **S3** (1.0 equiv) dissolved in AcOH (0.1 M). The solution was heated to 85 °C for 40 h. The resulting mixture was cooled to room temperature, diluted with DCM, and washed with brine and H<sub>2</sub>O. The organic layer was dried through anhydrous Na<sub>2</sub>SO<sub>4</sub>, filtered over Celite, and concentrated in vacuo. Column chromatography on silica gel gave the corresponding 2-iodoazobenzenes **S4**.

#### Typical procedure for preparation of **S7**

An oven-dried round bottom flask was charged with 2-iodophenols **S5** (1.0 equiv), K<sub>2</sub>CO<sub>3</sub> (2.0 equiv), acetone (0.5 M) and alkyl bromide (1-1.5 equiv). The reaction mixture was stirred at 60 °C in an oil bath for 10 h. After rapid filtration of silica gel, the solvent was evaporated by rotary evaporator, and the residue was purified by flash column chromatography on silica gel using EtOAc/petroleum ether as eluent to afford the product **S6**.

Under nitrogen atmosphere, a mixture of **S6** (1.0 eq.), CuI (5 mol%), Pd(PPh<sub>3</sub>)<sub>2</sub>Cl<sub>2</sub> (3 mol%) were added to a schlenk tube, Et<sub>3</sub>N (2.5M) and THF (0.5 M) as co-solvent was added to the reaction mixture, then alkyne (1.2 eq) was added slowly. The reaction was stirred at room temperature until the starting material was disappeared. After rapid filtration of silica gel, the solvent was evaporated by rotary evaporator. The residue was dissolved in THF (0.5 M), and TBAF tetrabutylammonium fluoride (1 eq) was added and stirred for 5-30 minutes. The mixture was diluted with H<sub>2</sub>O, and extracted with CH<sub>2</sub>Cl<sub>2</sub>. The extract was dried over MgSO<sub>4</sub> and evaporated under reduced pressure. The residue was purified by chromatography on silica gel with petroleum ether/ethyl acetate as the eluent to afford **S7**.

#### Typical procedure for preparation of **1**.<sup>[4]</sup>

2-iodoazobenzene **S4** (1.0 equiv), Pd(PPh<sub>3</sub>)<sub>2</sub>Cl<sub>2</sub> (0.04 equiv), CuI (0.08 equiv) and *n*BuNH<sub>2</sub> (6.0 mmol, 6.0 equiv) were dissolved in anhydrous THF (0.1 M) under N<sub>2</sub> atmosphere. To the resulting solution terminal alkyne **S7** (1.2 equiv) was added dropwise. The mixture was stirred at room temperature. After the reaction was completed (detected by TLC) (2-7 h), saturated NH<sub>4</sub>Cl aqueous solution was added. The organic layer was separated, and the aqueous layer was extracted twice with ethyl acetate. The combined organic layers were dried over Na<sub>2</sub>SO<sub>4</sub> and concentrated in vacuo (without heated). The crude residue was purified by column chromatography on silica gel to afford **1**.

#### (*E*)-1-((2-((2-(benzyloxy)phenyl)ethynyl)phenyl)-2-(4-bromophenyl)diazene (**1a**)

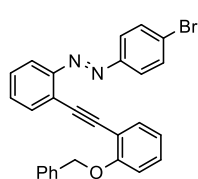

Yield 52% red solid, m. p. 96-97 °C, R<sub>f</sub> = 0.4 (EtOAc /petroleum ether = 1/20); <sup>1</sup>H NMR (400 MHz, CDCl<sub>3</sub>) δ 7.84 (d, J = 8.5 Hz, 2H), 7.77 – 7.67 (m, 2H), 7.56 (d, J = 6.6 Hz, 1H), 7.50 – 7.37 (m, 6H), 7.31 – 7.27 (m, 2H), 7.26 – 7.20 (m, 2H), 7.00 – 6.91 (m, 2H), 5.22 (s, 2H); <sup>13</sup>C NMR (101 MHz, CDCl<sub>3</sub>) δ 159.4, 152.7, 151.6, 137.0, 133.60, 133.57, 132.3, 130.9, 130.0, 128.8, 128.5, 127.7, 126.7, 125.6, 124.8, 124.6, 121.0, 116.0, 113.5, 113.2, 92.5, 91.0, 70.5; IR (KBr, cm<sup>-1</sup>) 3741, 3194, 3062, 2926, 2359, 1570, 1489, 1283, 1232, 1011, 831, 747; HRMS (ESI) Calcd for C<sub>27</sub>H<sub>19</sub>BrN<sub>2</sub>NaO (M+Na)<sup>+</sup> 489.0573, Found 489.0565.

#### (*E*)-1-(4-bromophenyl)-2-((2-((4-methylbenzyl)oxy)phenyl)ethynyl)phenyl)diazene (**1b**)

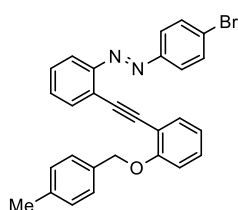

Yield 40%, red solid, m. p. 113-114 °C, R<sub>f</sub> = 0.5 (EtOAc/petroleum ether = 1/40); <sup>1</sup>H NMR (400 MHz, CDCl<sub>3</sub>) δ 7.79 – 7.69 (m, 2H), 7.62 (ddd, J = 11.9, 7.7, 1.6 Hz, 2H), 7.45 (dd, J = 7.6, 1.8 Hz, 1H), 7.41 – 7.34 (m, 2H), 7.34 –

7.25 (m, 2H), 7.23 (d,  $J = 7.7$  Hz, 2H), 7.19 – 7.10 (m, 1H), 6.97 (d,  $J = 7.7$  Hz, 2H), 6.90 – 6.78 (m, 2H), 5.07 (s, 2H), 2.19 (s, 3H);  $^{13}\text{C}$  NMR (101 MHz,  $\text{CDCl}_3$ )  $\delta$  159.5, 152.7, 151.6, 137.4, 134.0, 133.64, 133.60, 132.2, 130.9, 130.0, 129.2, 128.7, 126.7, 125.6, 124.8, 124.7, 121.0, 115.9, 113.5, 113.3, 92.7, 91.0, 70.5, 21.2; IR (KBr,  $\text{cm}^{-1}$ ) 2954, 2918, 2850, 2215, 1589, 1498, 1444, 1227, 1045, 748; HRMS (ESI) Calcd for  $\text{C}_{28}\text{H}_{22}\text{BrN}_2\text{O}$  ( $\text{M}+\text{H}$ ) $^+$  481.0910, Found 481.0907.

**(E)-1-(4-bromophenyl)-2-(2-((2-((4-methoxybenzyl)oxy)phenyl)ethynyl)phenyl)diazene (1c)**

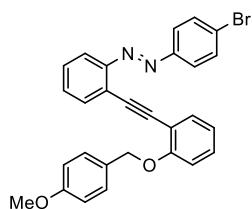 Yield 38%, red solid, m.p. 60-61 °C,  $R_f = 0.4$  (DCM/petroleum ether = 1/5);  $^1\text{H}$  NMR (400 MHz,  $\text{CDCl}_3$ )  $\delta$  7.83 (d,  $J = 8.6$  Hz, 1H), 7.76 – 7.70 (m, 1H), 7.70 – 7.64 (m, 1H), 7.54 (dd,  $J = 7.5, 1.4$  Hz, 1H), 7.49 (d,  $J = 8.6$  Hz, 2H), 7.46 – 7.37 (m, 2H), 7.34 (d,  $J = 8.6$  Hz, 2H), 7.29 – 7.23 (m, 1H), 6.98 – 6.89 (m, 2H), 6.79 (d,  $J = 8.7$  Hz, 2H), 5.13 (s, 2H), 3.74 (s, 3H);  $^{13}\text{C}$  NMR (101 MHz,  $\text{CDCl}_3$ )  $\delta$  159.5, 159.2, 152.6, 151.6, 133.62, 133.56, 132.3, 130.9, 129.0, 130.0, 128.7, 128.3, 125.6, 124.8, 124.7, 121.0, 115.9, 113.9, 113.6, 113.5, 92.6, 91.0, 70.5, 55.3; IR (KBr,  $\text{cm}^{-1}$ ) 3068, 2926, 2900, 2842, 2215, 1612, 1587, 1572, 1513, 1463, 1493, 1444, 1227, 1241, 1033, 831; HRMS (ESI) Calcd for  $\text{C}_{28}\text{H}_{22}\text{BrN}_2\text{O}_2$  ( $\text{M}+\text{H}$ ) $^+$  497.0859, Found 497.0855.

**(E)-1-(4-bromophenyl)-2-(2-((2-((4-fluorobenzyl)oxy)phenyl)ethynyl)phenyl)diazene (1d)**

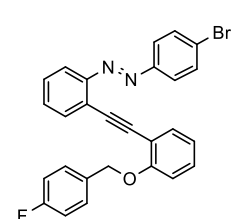 Yield 45%, red solid, m. p. 100-101 °C,  $R_f = 0.5$  (DCM/petroleum ether = 1/10);  $^1\text{H}$  NMR (400 MHz,  $\text{CDCl}_3$ )  $\delta$  7.74 (d,  $J = 8.3$  Hz, 2H), 7.65 (d,  $J = 7.8$  Hz, 1H), 7.59 (d,  $J = 7.5$  Hz, 1H), 7.47 (d,  $J = 7.5$  Hz, 1H), 7.43 (d,  $J = 8.3$  Hz, 2H), 7.37 – 7.30 (m, 4H), 7.19 (q,  $J = 7.3, 6.8$  Hz, 1H), 6.92 – 6.83 (m, 4H), 5.06 (s, 2H);  $^{13}\text{C}$  NMR (101 MHz,  $\text{CDCl}_3$ )  $\delta$  163.1 (d,  $J = 246.0$  Hz), 159.3, 152.7, 151.6, 133.5 (d,  $J = 7.2$  Hz), 132.7 (d,  $J = 3.2$  Hz), 132.2, 130.9, 130.0, 128.8, 128.6, 128.5, 125.6, 124.8, 124.5, 121.3, 116.0, 115.3 (d,  $J = 21.4$  Hz), 113.7, 113.4, 92.4, 91.1, 70.1;  $^{19}\text{F}$  NMR (376 MHz,  $\text{CDCl}_3$ )  $\delta$  -114.6; IR (KBr,  $\text{cm}^{-1}$ ) 3060, 2955, 2853, 2215, 1604, 1573, 1510, 1494, 1447, 1278, 1225, 832, 749; HRMS (ESI) Calcd for  $\text{C}_{27}\text{H}_{19}\text{BrFN}_2\text{O}$  ( $\text{M}+\text{H}$ ) $^+$  485.0659, Found 485.0663.

**(E)-1-(4-bromophenyl)-2-(2-((2-((4-chlorobenzyl)oxy)phenyl)ethynyl)phenyl)diazene (1e)**

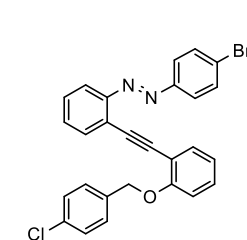 Yield 50%, red solid, m. p. 113-114 °C,  $R_f = 0.5$  (DCM/petroleum ether = 1/5);  $^1\text{H}$  NMR (500 MHz,  $\text{CDCl}_3$ )  $\delta$  7.81 (d,  $J = 8.4$  Hz, 2H), 7.73 (d,  $J = 8.0$  Hz, 1H), 7.68 (d,  $J = 7.5$  Hz, 1H), 7.56 (dd,  $J = 7.6, 1.7$  Hz, 1H), 7.50 (d,  $J = 8.4$  Hz, 2H), 7.48 – 7.39 (m, 2H), 7.36 (d,  $J = 8.1$  Hz, 2H), 7.31 – 7.25 (m, 1H), 7.20 (d,  $J = 8.1$  Hz, 2H), 6.98 (t,  $J = 7.5$  Hz, 1H), 6.91 (d,  $J = 8.3$  Hz, 1H), 5.14 (s, 2H);  $^{13}\text{C}$  NMR (126 MHz,  $\text{CDCl}_3$ )  $\delta$  159.2, 152.7, 151.5, 135.4, 133.6, 133.5, 133.4, 132.2, 130.9, 130.0, 128.8, 128.6, 128.0, 125.6, 124.7, 124.5, 121.3, 116.0, 113.7, 113.2, 92.3, 91.1, 69.9; IR (KBr,  $\text{cm}^{-1}$ ) 3006, 2924, 2851, 2210, 1572, 1495, 1411, 1275, 1260, 834, 763, 749; HRMS (ESI) Calcd for  $\text{C}_{27}\text{H}_{18}\text{BrClN}_2\text{NaO}$  ( $\text{M}+\text{Na}$ ) $^+$  523.0183, Found 523.0185.

**(E)-1-(2-((2-((4-bromobenzyl)oxy)phenyl)ethynyl)phenyl)-2-(4-bromophenyl)diazene (1f)**

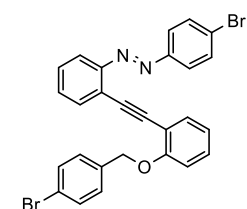 Yield 50%, red solid, m. p. 122-123 °C,  $R_f = 0.5$  (DCM/petroleum ether = 1/5);  $^1\text{H}$  NMR (500 MHz,  $\text{CDCl}_3$ )  $\delta$  7.81 (d,  $J = 8.3$  Hz, 2H), 7.73 (d,  $J = 8.0$  Hz, 1H), 7.68 (d,  $J = 7.6$  Hz, 1H), 7.56 (d,  $J = 7.6$  Hz, 1H), 7.50 (d,  $J = 8.3$  Hz, 2H), 7.46 – 7.39 (m, 2H), 7.35 (d,  $J = 8.1$  Hz, 2H), 7.30 (s, 1H), 7.29 – 7.20

(m, 2H), 6.98 (t,  $J = 7.5$  Hz, 1H), 6.90 (d,  $J = 8.3$  Hz, 1H), 5.12 (s, 2H);  $^{13}\text{C}$  NMR (126 MHz,  $\text{CDCl}_3$ )  $\delta$  159.1, 152.7, 151.5, 136.0, 133.6, 133.5, 132.2, 131.5, 130.9, 130.0, 128.8, 128.3, 125.6, 124.7, 124.5, 121.6, 121.3, 116.0, 113.6, 113.2, 92.3, 91.1, 69.9; IR (KBr,  $\text{cm}^{-1}$ ) 3006, 2918, 2851, 2220, 1572, 1408, 1275, 1260, 833, 763, 750; HRMS (ESI) Calcd for  $\text{C}_{27}\text{H}_{18}\text{Br}_2\text{N}_2\text{NaO}$  ( $\text{M}+\text{Na}$ ) $^+$  566.9678, Found 544.9855.

**(E)-1-(4-bromophenyl)-2-(2-((2-((4-(trifluoromethyl)benzyl)oxy)phenyl)ethynyl)phenyl)diazene (Ig)**

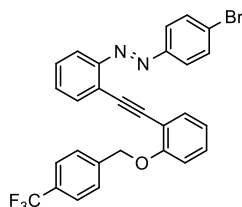

Yield 41%, red solid, m. p. 147-148 °C,  $R_f = 0.5$  (DCM/petroleum ether = 1/1);  $^1\text{H}$  NMR (400 MHz,  $\text{CDCl}_3$ )  $\delta$  7.80 (d,  $J = 8.4$  Hz, 2H), 7.75 (d,  $J = 8.0$  Hz, 1H), 7.69 (dd,  $J = 7.4, 1.9$  Hz, 1H), 7.60 – 7.52 (m, 3H), 7.51 – 7.34 (m, 6H), 7.30 (t,  $J = 8.0$  Hz, 1H), 7.01 (t,  $J = 7.5$  Hz, 1H), 6.92 (d,  $J = 7.6$  Hz, 1H), 5.23 (s, 1H);  $^{13}\text{C}$  NMR (101 MHz,  $\text{CDCl}_3$ )  $\delta$  159.0, 152.7, 151.5, 141.0, 133.6, 133.5, 132.2, 130.9, 130.0, 128.9, 127.3, 126.7, 125.6, 125.4 (q,  $J = 4.0$  Hz), 124.7, 124.4, 121.4, 116.0, 113.6, 113.0, 92.2, 91.2, 69.7;  $^{19}\text{F}$  NMR (376 MHz,  $\text{CDCl}_3$ )  $\delta$  -62.5; IR (KBr,  $\text{cm}^{-1}$ ) 2926, 2217, 1573, 1469, 1445, 1421, 1325, 1280, 1164, 1115, 1066, 822, 762; HRMS (ESI) Calcd for  $\text{C}_{28}\text{H}_{19}\text{BrF}_3\text{N}_2\text{O}$  ( $\text{M}+\text{H}$ ) $^+$  535.0627, Found 535.0625.

**(E)-4-((2-((2-((4-bromophenyl)diazenyl)phenyl)ethynyl)phenoxy)methyl)benzonitrile (Ih)**

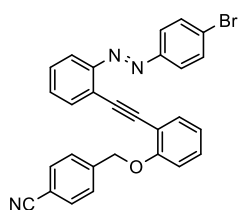

Yield 39%, red solid, m. p. 235-236 °C,  $R_f = 0.8$  (DCM/petroleum ether = 1/2);  $^1\text{H}$  NMR (400 MHz,  $\text{CDCl}_3$ )  $\delta$  7.85 – 7.73 (m, 3H), 7.70 (dd,  $J = 7.3, 1.8$  Hz, 1H), 7.58 (dd,  $J = 7.6, 1.8$  Hz, 1H), 7.53 (d,  $J = 8.2$  Hz, 2H), 7.51 – 7.39 (m, 6H), 7.31 (td,  $J = 7.9, 1.8$  Hz, 1H), 7.02 (td,  $J = 7.5, 1.0$  Hz, 1H), 6.92 (d,  $J = 8.3$  Hz, 1H), 5.21 (s, 2H);  $^{13}\text{C}$  NMR (101 MHz,  $\text{CDCl}_3$ )  $\delta$  158.8, 152.7, 151.4, 142.3, 133.7, 133.4, 132.2, 131.0, 130.1, 129.0, 127.0, 125.7, 124.7, 124.4, 121.6, 118.7, 116.1, 113.7, 113.0, 111.5, 92.1, 91.3, 69.5; IR (KBr,  $\text{cm}^{-1}$ ) 3060, 2900, 2867, 2225, 2214, 1589, 1572, 1495, 1278, 1238, 1108, 833, 815, 748; HRMS (ESI) Calcd for  $\text{C}_{28}\text{H}_{19}\text{BrN}_3\text{O}$  ( $\text{M}+\text{H}$ ) $^+$  492.0706, Found 492.0702.

**(E)-1-(2-((2-((3-bromobenzyl)oxy)phenyl)ethynyl)phenyl)-2-(4-bromophenyl)diazene (Ii)**

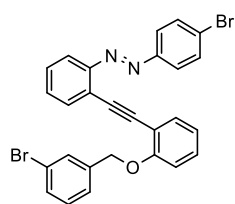

Yield 38%, red solid, m. p. 105-106 °C,  $R_f = 0.5$  (DCM/petroleum ether = 1/10);  $^1\text{H}$  NMR (500 MHz,  $\text{CDCl}_3$ )  $\delta$  7.72 (d,  $J = 8.4$  Hz, 2H), 7.67 – 7.60 (m, 2H), 7.56 (s, 1H), 7.46 (dd,  $J = 7.6, 1.7$  Hz, 1H), 7.40 (d,  $J = 8.3$  Hz, 2H), 7.34 (t,  $J = 7.4$  Hz, 1H), 7.29 (t,  $J = 7.7$  Hz, 1H), 7.23 (t,  $J = 8.4$  Hz, 2H), 7.17 (td,  $J = 7.9, 1.7$  Hz, 1H), 7.01 (t,  $J = 7.8$  Hz, 1H), 6.88 (t,  $J = 7.5$  Hz, 1H), 6.80 (d,  $J = 8.3$  Hz, 1H), 5.02 (s, 2H);  $^{13}\text{C}$  NMR (126 MHz,  $\text{CDCl}_3$ )  $\delta$  159.1, 152.7, 151.6, 139.3, 133.7, 133.6, 132.2, 131.0, 130.8, 130.03, 130.00, 129.6, 128.9, 125.6, 125.1, 124.8, 124.5, 122.7, 121.4, 116.0, 113.6, 113.1, 92.3, 91.3, 69.7; IR (KBr,  $\text{cm}^{-1}$ ) 3061, 2954, 2924, 2853, 2215, 1590, 1572, 1495, 1478, 1279, 1239, 1065, 1006, 832, 740; HRMS (ESI) Calcd for  $\text{C}_{27}\text{H}_{19}\text{Br}_2\text{N}_2\text{O}$  ( $\text{M}+\text{H}$ ) $^+$  544.9859, Found 544.9852.

**(E)-1-(2-((2-((2-bromobenzyl)oxy)phenyl)ethynyl)phenyl)-2-(4-bromophenyl)diazene (Ij)**

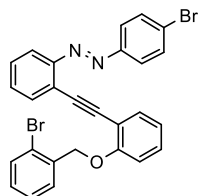

Yield 45%, red solid, m. p. 115-116 °C,  $R_f = 0.4$  (EtOAc/petroleum ether = 1/40);  $^1\text{H}$  NMR (400 MHz,  $\text{CDCl}_3$ )  $\delta$  7.80 (d,  $J = 8.4$  Hz, 2H), 7.76 – 7.70 (m, 2H), 7.70 – 7.65 (m, 1H), 7.57 (dd,  $J = 7.6, 1.8$  Hz, 1H), 7.51 (d,  $J = 7.8$  Hz, 1H), 7.48

– 7.35 (m, 4H), 7.29 (td,  $J = 7.9, 1.7$  Hz, 1H), 7.17 – 7.09 (m, 1H), 7.07 (dt,  $J = 7.6, 3.8$  Hz, 1H), 6.99 (t,  $J = 7.5$  Hz, 1H), 6.93 (d,  $J = 8.4$  Hz, 1H), 5.22 (s, 2H);  $^{13}\text{C}$  NMR (101 MHz,  $\text{CDCl}_3$ )  $\delta$  159.1, 152.7, 151.5, 136.2, 133.6, 133.5, 132.3, 132.2, 130.9, 130.1, 128.9, 128.8, 128.3, 127.5, 125.7, 124.8, 124.6, 121.34, 121.25, 116.0, 113.4, 112.9, 92.4, 91.1, 69.8; IR (KBr,  $\text{cm}^{-1}$ ) 3063, 2955, 2923, 2851, 2216, 1590, 1572, 1495, 1472, 1446, 1396, 1280, 1241, 1065, 1046, 1023, 749; HRMS (ESI) Calcd for  $\text{C}_{27}\text{H}_{19}\text{Br}_2\text{N}_2\text{O}$  ( $\text{M}+\text{H}$ ) $^+$  544.9859, Found 544.9855

**(E)-1-(4-bromophenyl)-2-(2-((2-methoxybenzyl)oxy)phenyl)ethynyl)phenyl)diazene (1k)**

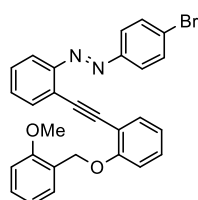

Yield 55%, red solid, m. p. 90-91 °C,  $R_f = 0.6$  (EtOAc/petroleum ether = 1/20);  $^1\text{H}$  NMR (500 MHz,  $\text{CDCl}_3$ )  $\delta$  7.88 – 7.79 (m, 2H), 7.73 (ddd,  $J = 7.6, 4.5, 1.4$  Hz, 2H), 7.57 (ddd,  $J = 9.8, 7.6, 1.7$  Hz, 2H), 7.48 – 7.36 (m, 4H), 7.27 (td,  $J = 7.9, 1.7$  Hz, 1H), 7.20 (td,  $J = 7.9, 1.7$  Hz, 1H), 6.95 (t,  $J = 7.5$  Hz, 2H), 6.88 – 6.79 (m, 2H), 5.25 (s, 2H), 3.85 (s, 3H);  $^{13}\text{C}$  NMR (126 MHz,  $\text{CDCl}_3$ )  $\delta$  159.6, 156.2, 152.7, 151.6, 133.5, 133.4, 132.2, 130.9, 130.0, 128.7, 128.4, 127.4, 125.5, 125.4, 124.8, 124.8, 120.7, 120.6, 115.9, 113.3, 112.9, 109.9, 92.7, 90.9, 65.6, 55.4; IR (KBr,  $\text{cm}^{-1}$ ) 3059, 2959, 2928, 2857, 2216, 1734, 1590, 1573, 1495, 1278, 1244, 1048, 1031, 834, 740; HRMS (ESI) Calcd for  $\text{C}_{28}\text{H}_{21}\text{BrN}_2\text{NaO}_2$  ( $\text{M}+\text{Na}$ ) $^+$  519.0679, Found 519.0682.

**(E)-1-(4-bromophenyl)-2-(2-((naphthalen-1-ylmethoxy)phenyl)ethynyl)phenyl)diazene (1l)**

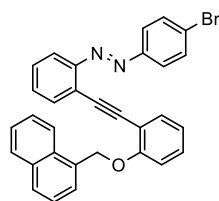

Yield 41%, red solid, m. p. 120-121 °C,  $R_f = 0.6$  (DCM/petroleum ether = 1/10);  $^1\text{H}$  NMR (500 MHz,  $\text{CDCl}_3$ )  $\delta$  8.12 – 8.07 (m, 1H), 7.85 – 7.80 (m, 1H), 7.80 – 7.76 (m, 2H), 7.74 (d,  $J = 8.3$  Hz, 1H), 7.72 – 7.67 (m, 1H), 7.65 (d,  $J = 7.0$  Hz, 1H), 7.56 (dd,  $J = 7.7, 1.7$  Hz, 1H), 7.52 – 7.46 (m, 1H), 7.46 – 7.38 (m, 4H), 7.38 – 7.30 (m, 3H), 7.27 (td,  $J = 7.8, 1.7$  Hz, 1H), 7.02 (d,  $J = 8.3$  Hz, 1H), 6.97 (t,  $J = 7.4$  Hz, 1H), 5.63 (s, 2H);  $^{13}\text{C}$  NMR (126 MHz,  $\text{CDCl}_3$ )  $\delta$  159.5, 152.6, 151.5, 133.7, 133.61, 133.56, 132.2, 131.0, 130.8, 130.0, 128.71, 128.69, 128.6, 126.4, 125.8, 125.61, 125.59, 125.3, 124.7, 124.6, 123.5, 121.3, 115.9, 113.8, 113.6, 92.6, 91.2, 69.4; IR (KBr,  $\text{cm}^{-1}$ ) 3059, 2924, 2215, 1590, 1573, 1494, 1478, 1446, 1278, 1265, 1234, 1065, 1006, 748; HRMS (ESI) Calcd for  $\text{C}_{31}\text{H}_{22}\text{BrN}_2\text{O}$  ( $\text{M}+\text{H}$ ) $^+$  517.0910, Found 517.0901.

**(E)-1-(4-bromophenyl)-2-(2-((naphthalen-2-ylmethoxy)phenyl)ethynyl)phenyl)diazene (1m)**

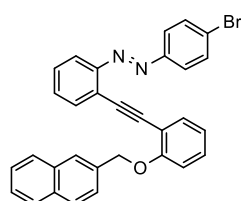

Yield 39%, red solid, m. p. 119-120 °C,  $R_f = 0.4$  (DCM/petroleum ether = 1/5);  $^1\text{H}$  NMR (500 MHz,  $\text{CDCl}_3$ )  $\delta$  7.90 (s, 1H), 7.79 – 7.75 (m, 3H), 7.76 – 7.70 (m, 3H), 7.70 – 7.65 (m, 1H), 7.57 (dd,  $J = 8.0, 1.7$  Hz, 1H), 7.52 (dd,  $J = 8.4, 1.7$  Hz, 1H), 7.44 – 7.37 (m, 6H), 7.26 (td,  $J = 7.9, 1.8$  Hz, 1H), 7.02 – 6.93 (m, 2H), 5.34 (s, 2H);  $^{13}\text{C}$  NMR (126 MHz,  $\text{CDCl}_3$ )  $\delta$  159.5, 152.7, 151.5, 134.5, 133.64, 133.55, 133.3, 133.0, 132.1, 130.9, 130.0, 128.8, 128.3, 127.9, 127.7, 126.2, 125.9, 125.5, 124.7, 124.6, 121.1, 116.0, 113.7, 113.3, 92.6, 91.2, 70.8; IR (KBr,  $\text{cm}^{-1}$ ) 3057, 2924, 2853, 2215, 1590, 1573, 1494, 1479, 1446, 1278, 1239, 1148, 1007, 833, 814, 749; HRMS (ESI) Calcd for  $\text{C}_{31}\text{H}_{22}\text{BrN}_2\text{O}$  ( $\text{M}+\text{H}$ ) $^+$  517.0910, Found 517.0908

**(E)-1-(2-((2-allyloxy)phenyl)ethynyl)phenyl)-2-(4-bromophenyl)diazene (In)**

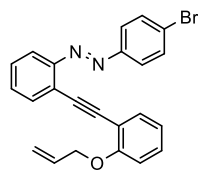

Yield 40%, red solid, m. p. 70-71 °C,  $R_f = 0.4$  (EtOAc/petroleum ether = 1/20);  $^1\text{H}$  NMR (500 MHz,  $\text{CDCl}_3$ )  $\delta$  7.94 – 7.86 (m, 2H), 7.72 (dd,  $J = 7.8, 1.5$  Hz, 2H), 7.62 (d,  $J = 8.7$  Hz, 2H), 7.54 (dd,  $J = 7.6, 1.8$  Hz, 1H), 7.44 (td,  $J = 7.4, 1.5$  Hz, 1H), 7.38 (td,  $J = 7.6, 1.6$  Hz, 1H), 7.28 (td,  $J = 7.9, 1.8$  Hz, 1H), 6.95 (t,  $J = 7.5$  Hz, 1H), 6.90 (d,  $J = 8.3$  Hz, 1H), 6.02 (ddt,  $J = 17.4, 10.1, 4.8$  Hz, 1H), 5.46 (dd,  $J = 17.2, 1.8$  Hz, 1H), 5.22 (dd,  $J = 10.7, 1.7$  Hz, 1H), 4.65 (dt,  $J = 4.8, 1.8$  Hz, 2H);  $^{13}\text{C}$  NMR (126 MHz,  $\text{CDCl}_3$ )  $\delta$  159.2, 152.7, 151.7, 133.7, 133.6, 133.0, 132.3, 130.9, 129.9, 128.7, 125.6, 124.9, 124.6, 120.8, 117.2, 116.0, 113.3, 112.8, 92.5, 90.8, 69.4; IR (KBr,  $\text{cm}^{-1}$ ) 2959, 2924, 2216, 1591, 1573, 1494, 1445, 1278, 1225, 1006, 928, 832, 748; HRMS (ESI) Calcd for  $\text{C}_{23}\text{H}_{18}\text{BrN}_2\text{O}$  ( $\text{M}+\text{H}$ ) $^+$  417.0597, Found 417.0602.

**(E)-1-(4-bromophenyl)-2-(2-((2-but-2-yn-1-yloxy)phenyl)ethynyl)phenyl)diazene (Io)**

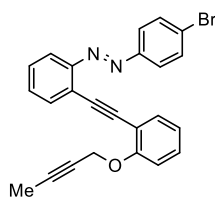

Yield 43%, red solid m. p. 60-61 °C;  $R_f = 0.4$  (EtOAc/petroleum ether = 1/20);  $^1\text{H}$  NMR (500 MHz,  $\text{CDCl}_3$ )  $\delta$  7.99 – 7.90 (m, 2H), 7.73 (ddd,  $J = 7.7, 4.0, 1.4$  Hz, 2H), 7.71 – 7.65 (m, 2H), 7.55 (dd,  $J = 7.5, 1.7$  Hz, 1H), 7.43 (td,  $J = 7.4, 1.4$  Hz, 1H), 7.38 (td,  $J = 7.7, 1.6$  Hz, 1H), 7.35 – 7.29 (m, 1H), 7.10 (d,  $J = 8.3$  Hz, 1H), 6.98 (t,  $J = 7.5$  Hz, 1H), 4.76 (d,  $J = 2.4$  Hz, 2H), 1.83 (t,  $J = 2.4$  Hz, 3H);  $^{13}\text{C}$  NMR (126 MHz,  $\text{CDCl}_3$ )  $\delta$  158.6, 152.6, 151.7, 133.7, 133.5, 132.4, 130.9, 129.9, 128.8, 125.6, 125.0, 124.7, 121.2, 115.8, 113.3, 113.0, 92.4, 90.9, 84.3, 74.2, 57.2, 3.8; IR (KBr,  $\text{cm}^{-1}$ ) 3064, 2920, 2863, 2223, 1585, 1486, 1288, 1223, 1002, 831, 752; HRMS (ESI) Calcd for  $\text{C}_{24}\text{H}_{17}\text{BrN}_2\text{NaO}$  ( $\text{M}+\text{Na}$ ) $^+$  451.0416, Found 451.0408.

**(E)-1-(4-bromophenyl)-2-(2-((2-((3-(trimethylsilyl)prop-2-yn-1-yl)oxy)phenyl)ethynyl)phenyl)-diazene (Ip)**

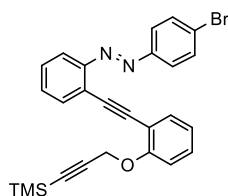

Yield 39%, red oil,  $R_f = 0.4$  (EtOAc/petroleum ether = 1/20);  $^1\text{H}$  NMR (500 MHz,  $\text{CDCl}_3$ )  $\delta$  7.79 (d,  $J = 8.5$  Hz, 2H), 7.61 – 7.51 (m, 4H), 7.39 (dd,  $J = 7.5, 1.8$  Hz, 1H), 7.27 (td,  $J = 7.4, 1.4$  Hz, 1H), 7.22 (td,  $J = 7.6, 1.6$  Hz, 1H), 7.16 (td,  $J = 7.9, 1.7$  Hz, 1H), 6.96 (d,  $J = 8.3$  Hz, 1H), 6.84 (t,  $J = 7.5$  Hz, 1H), 4.63 (s, 2H), 0.00 (s, 9H);  $^{13}\text{C}$  NMR (126 MHz,  $\text{CDCl}_3$ )  $\delta$  158.8, 152.9, 152.0, 133.9, 133.7, 132.7, 131.2, 130.1, 129.1, 126.0, 125.3, 124.9, 121.7, 116.1, 113.8, 113.7, 100.4, 93.7, 92.5, 91.3, 57.9, 0.0; IR (KBr,  $\text{cm}^{-1}$ ) 3065, 2956, 2218, 2178, 1581, 1484, 1406, 1252, 1218, 1154, 1052, 927, 846, 756; HRMS (ESI) Calcd for  $\text{C}_{26}\text{H}_{23}\text{BrN}_2\text{OSi}$  ( $\text{M}+\text{H}$ ) $^+$  487.0836, Found 487.0831.

**(E)-1-(4-bromophenyl)-2-(2-((2-(3-phenylpropoxy)phenyl)ethynyl)phenyl)diazene (Iq)**

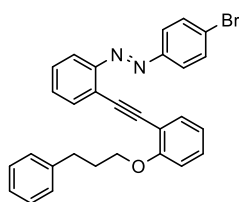

Yield 58%, red solid, m. p. 110-111 °C,  $R_f = 0.6$  (EtOAc/petroleum ether = 1/40);  $^1\text{H}$  NMR (500 MHz,  $\text{CDCl}_3$ )  $\delta$  7.86 (d,  $J = 8.5$  Hz, 2H), 7.71 (d,  $J = 7.7$  Hz, 2H), 7.58 (d,  $J = 8.3$  Hz, 2H), 7.53 (d,  $J = 7.5$  Hz, 1H), 7.44 – 7.33 (m, 2H), 7.26 (t,  $J = 7.8$  Hz, 1H), 7.20 (d,  $J = 8.0$  Hz, 2H), 7.13 (t,  $J = 8.1$  Hz, 3H), 6.93 (t,  $J = 7.5$  Hz, 1H), 6.85 (d,  $J = 8.3$  Hz, 1H), 4.02 (t,  $J = 6.2$  Hz, 2H), 2.79 (t,  $J = 7.6$  Hz, 2H), 2.11 – 2.02 (m, 2H);  $^{13}\text{C}$  NMR (126 MHz,  $\text{CDCl}_3$ )  $\delta$  159.7, 152.7, 151.7, 141.5, 133.6, 133.5, 132.3, 130.9, 130.0, 128.7, 128.6, 128.4, 125.9, 125.7, 124.9, 124.7, 120.6, 116.1, 113.2, 112.4, 92.7, 90.8, 67.6, 32.0, 30.9; IR (KBr,  $\text{cm}^{-1}$ ) 3061, 3026, 2954, 2923, 2853,



2215, 1589, 1573, 1494, 1277, 1241, 832, 739; HRMS (ESI) Calcd for C<sub>29</sub>H<sub>24</sub>BrN<sub>2</sub>O (M+H)<sup>+</sup> 495.1067, Found 495.1065.

**(E)-1-(4-bromophenyl)-2-(2-((2-isopentyloxy)phenyl)ethynyl)phenyl)diazene (Ir)**

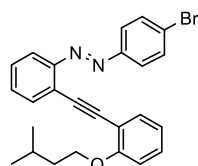

Yield 72%, red solid, m. p. 70-71 °C, R<sub>f</sub> = 0.6 (petroleum ether); <sup>1</sup>H NMR (400 MHz, CDCl<sub>3</sub>) δ 7.94 – 7.82 (m, 2H), 7.75 – 7.67 (m, 2H), 7.67 – 7.60 (m, 2H), 7.52 (dd, *J* = 7.6, 1.8 Hz, 1H), 7.47 – 7.33 (m, 2H), 7.29 (td, *J* = 7.9, 1.8 Hz, 1H), 6.97 – 6.87 (m, 2H), 4.07 (t, *J* = 6.7 Hz, 2H), 1.91 – 1.78 (m, 1H), 1.67 (dd, *J* = 6.7, 6.3 Hz, 2H), 0.91 (d, *J* = 6.6 Hz, 6H); <sup>13</sup>C NMR (101 MHz, CDCl<sub>3</sub>) δ 159.9, 152.6, 151.7, 133.5, 132.3, 130.8, 130.0, 128.6, 125.6, 124.9, 124.7, 120.4, 116.0, 113.1, 112.2, 92.8, 90.6, 67.4, 37.9, 25.2, 22.7; IR (KBr, cm<sup>-1</sup>) 2956, 2928, 2871, 2222, 1591, 1573, 1495, 1444, 1279, 1244, 1066, 743; HRMS (ESI) Calcd for C<sub>25</sub>H<sub>23</sub>BrN<sub>2</sub>NaO (M+Na)<sup>+</sup> 469.0886, Found 469.0880.

**(E)-1-(4-bromophenyl)-2-(2-((2-isobutoxy)phenyl)ethynyl)phenyl)diazene (Is)**

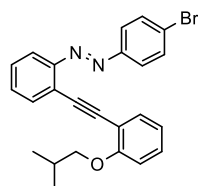

Yield 50%, red solid, m. p. 65-66 °C, R<sub>f</sub> = 0.5 (EtOAc/petroleum ether = 1/50); <sup>1</sup>H NMR (500 MHz, CDCl<sub>3</sub>) δ 7.89 (d, *J* = 8.4 Hz, 2H), 7.74 – 7.68 (m, 2H), 7.64 (d, *J* = 8.3 Hz, 2H), 7.51 (dd, *J* = 7.6, 1.7 Hz, 1H), 7.45 (td, *J* = 7.5, 1.3 Hz, 1H), 7.42 – 7.36 (m, 1H), 7.33 – 7.27 (m, 1H), 6.97 – 6.87 (m, 2H), 3.81 (d, *J* = 6.6 Hz, 2H), 2.15 – 2.05 (m, 1H), 1.02 (d, *J* = 6.7 Hz, 6H); <sup>13</sup>C NMR (126 MHz, CDCl<sub>3</sub>) δ 159.9, 152.7, 151.7, 133.6, 133.4, 132.3, 130.8, 130.0, 128.6, 125.6, 124.8, 124.7, 120.4, 116.0, 113.1, 112.2, 92.6, 90.5, 75.1, 28.4, 19.2; IR (KBr, cm<sup>-1</sup>) 2970, 2936, 2873, 2220, 1573, 1496, 1275, 1260, 764, 749; HRMS (ESI) Calcd for C<sub>24</sub>H<sub>22</sub>BrN<sub>2</sub>O (M+H)<sup>+</sup> 433.0910, Found 433.0911.

**(E)-1-(4-bromophenyl)-2-(2-((2-cyclopropylmethoxy)phenyl)ethynyl)phenyl)diazene (It)**

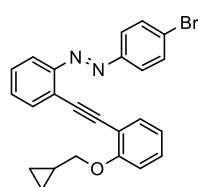

Yield 52%, red solid, m. p. 69-70 °C, R<sub>f</sub> = 0.4 (EtOAc/petroleum ether = 1/50); <sup>1</sup>H NMR (400 MHz, CDCl<sub>3</sub>) δ 7.93 – 7.84 (m, 2H), 7.76 – 7.68 (m, 2H), 7.65 – 7.60 (m, 2H), 7.52 (dd, *J* = 7.6, 1.8 Hz, 1H), 7.46 – 7.40 (m, 1H), 7.40 – 7.34 (m, 1H), 7.27 (t, *J* = 7.8 Hz, 1H), 6.94 (t, *J* = 7.5 Hz, 1H), 6.90 (d, *J* = 8.4 Hz, 1H), 3.93 (d, *J* = 6.5 Hz, 2H), 1.27 – 1.19 (m, 1H), 0.56 – 0.49 (m, 2H), 0.38 – 0.31 (m, 2H); <sup>13</sup>C NMR (126 MHz, CDCl<sub>3</sub>) δ 159.8, 152.7, 151.7, 133.63, 133.57, 132.3, 130.9, 130.0, 128.7, 125.6, 124.9, 124.7, 120.8, 116.0, 113.6, 113.4, 92.8, 90.7, 73.5, 10.4, 3.2; IR (KBr, cm<sup>-1</sup>) 3079, 3006, 2923, 2871, 2215, 1590, 1573, 1494, 1480, 1446, 1279, 1241, 1108, 1022, 1007, 834, 750; HRMS (ESI) Calcd for C<sub>24</sub>H<sub>20</sub>BrN<sub>2</sub>O (M+H)<sup>+</sup> 431.0754, Found 431.0746.

**(E)-1-(4-bromophenyl)-2-(2-((2-(3-methoxypropoxy)phenyl)ethynyl)phenyl)diazene (Iu)**

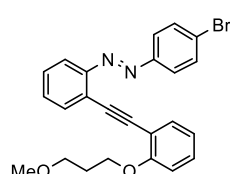

Yield 51%, red solid, m. p. 60-61 °C, R<sub>f</sub> = 0.6 (EtOAc/petroleum ether = 1/20); <sup>1</sup>H NMR (500 MHz, CDCl<sub>3</sub>) δ 7.88 (d, *J* = 8.6 Hz, 2H), 7.70 (ddd, *J* = 7.6, 3.3, 1.4 Hz, 2H), 7.66 – 7.61 (m, 2H), 7.52 (dd, *J* = 7.5, 1.7 Hz, 1H), 7.42 (td, *J* = 7.5, 1.3 Hz, 1H), 7.37 (ddd, *J* = 8.7, 7.3, 1.5 Hz, 1H), 7.32 – 7.25 (m, 1H), 6.97 – 6.89 (m, 2H), 4.14 (t, *J* = 6.3 Hz, 2H), 3.53 (t, *J* = 6.2 Hz, 2H), 3.26 (s, 3H), 2.02 (p, *J* = 6.3 Hz, 2H); <sup>13</sup>C NMR (126 MHz, CDCl<sub>3</sub>) δ 159.6, 152.6, 151.7, 133.6, 133.5, 132.4, 130.9, 130.1, 128.7, 125.7, 124.8, 124.7, 120.6, 116.0, 113.1, 112.4, 92.7, 90.7, 69.1, 65.7, 58.7, 29.6; IR (KBr, cm<sup>-1</sup>) 3062, 2927, 2877, 2215, 1645, 1596, 1494, 1453, 1279, 1246, 1115, 833, 750; HRMS (ESI) Calcd for C<sub>24</sub>H<sub>22</sub>BrN<sub>2</sub>O<sub>2</sub> (M+H)<sup>+</sup> 449.0859, Found 449.0862.

**(E)-1-(2-((2-(benzyloxy)phenyl)ethynyl)phenyl)-2-phenyldiazene (1v)**

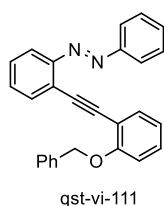

Yield 42%, red solid, m. p. 110-111 °C,  $R_f = 0.6$  (EtOAc/petroleum ether = 1/40);  $^1\text{H NMR}$  (500 MHz,  $\text{CDCl}_3$ )  $\delta$  8.05 – 7.98 (m, 2H), 7.74 (dd,  $J = 6.9, 2.3$  Hz, 1H), 7.69 (dd,  $J = 6.6, 2.5$  Hz, 1H), 7.57 (dd,  $J = 7.6, 1.8$  Hz, 1H), 7.49 – 7.44 (m, 2H), 7.44 – 7.35 (m, 5H), 7.31 – 7.22 (m, 4H), 6.95 (t,  $J = 7.5$  Hz, 1H), 6.90 (d,  $J = 8.3$  Hz, 1H), 5.21 (s, 2H);  $^{13}\text{C NMR}$  (126 MHz,  $\text{CDCl}_3$ )  $\delta$  159.4, 153.0, 152.9, 137.1, 133.63, 133.55, 131.2, 130.5, 129.9, 129.0, 128.8, 128.5, 127.7, 126.8, 124.3, 123.4, 121.0, 116.1, 113.7, 113.3, 92.3, 91.2, 70.5; IR (KBr,  $\text{cm}^{-1}$ ) 3061, 2962, 2213, 1586, 1488, 1451, 1279, 1230, 1155, 1107, 1015, 753, 692; HRMS (ESI) Calcd for  $\text{C}_{27}\text{H}_{21}\text{N}_2\text{O}$  ( $\text{M}+\text{H}$ ) $^+$  389.1649, Found 389.1643.

**(E)-1-(2-((2-(benzyloxy)phenyl)ethynyl)phenyl)-2-(4-methoxyphenyl)diazene (1w)**

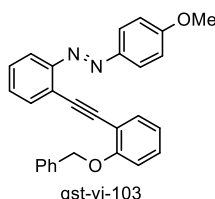

Yield 49%, red oil,  $R_f = 0.4$  (DCM/petroleum ether = 1/5);  $^1\text{H NMR}$  (400 MHz,  $\text{CDCl}_3$ )  $\delta$  8.11 – 8.01 (m, 2H), 7.82 – 7.76 (m, 1H), 7.76 – 7.72 (m, 1H), 7.64 (dd,  $J = 7.6, 1.6$  Hz, 1H), 7.53 (d,  $J = 7.2$  Hz, 2H), 7.48 – 7.40 (m, 2H), 7.39 – 7.32 (m, 2H), 7.32 – 7.27 (m, 2H), 7.01 (td,  $J = 7.5, 0.8$  Hz, 1H), 6.97 – 6.89 (m, 3H), 5.29 (s, 2H), 3.84 (s, 3H);  $^{13}\text{C NMR}$  (101 MHz,  $\text{CDCl}_3$ )  $\delta$  162.3, 159.4, 153.1, 147.4, 137.2, 133.6, 133.5, 129.9, 129.8, 128.8, 128.5, 127.7, 126.7, 125.3, 123.8, 121.0, 116.0, 114.2, 113.8, 113.3, 92.1, 91.4, 70.5, 55.6; IR (KBr,  $\text{cm}^{-1}$ ) 3062, 2933, 2213, 1593, 1498, 1451, 1258, 1145, 1103, 1025, 837, 752, 697; HRMS (ESI) Calcd for  $\text{C}_{28}\text{H}_{23}\text{N}_2\text{O}_2$  ( $\text{M}+\text{H}$ ) $^+$  419.1754, Found 419.1749.

**(E)-1-(2-((2-(benzyloxy)phenyl)ethynyl)-4-fluorophenyl)-2-(4-bromophenyl)diazene (1x)**

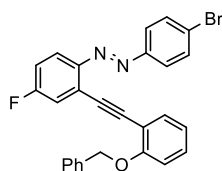

Yield 41%, red solid, m. p. 110-111 °C,  $R_f = 0.6$  (DCM/petroleum ether = 1/5);  $^1\text{H NMR}$  (500 MHz,  $\text{CDCl}_3$ )  $\delta$  7.82 (d,  $J = 8.3$  Hz, 2H), 7.78 (dd,  $J = 9.1, 5.6$  Hz, 1H), 7.55 (d,  $J = 7.6$  Hz, 1H), 7.51 – 7.42 (m, 4H), 7.36 (dd,  $J = 9.0, 2.7$  Hz, 1H), 7.33 – 7.25 (m, 4H), 7.09 (td,  $J = 8.4, 2.8$  Hz, 1H), 6.97 (t,  $J = 7.5$  Hz, 1H), 6.94 (d,  $J = 8.4$  Hz, 1H), 5.22 (s, 2H);  $^{13}\text{C NMR}$  (126 MHz,  $\text{CDCl}_3$ )  $\delta$  163.9 (d,  $J = 252.9$  Hz), 159.5, 151.4, 149.2 (d,  $J = 3.1$  Hz), 136.9, 133.6, 132.3, 130.4, 128.5, 127.8, 126.9 (d,  $J = 10.6$  Hz), 126.6, 125.6, 124.8, 121.0, 119.6 (d,  $J = 23.9$  Hz), 117.9 (d,  $J = 9.6$  Hz), 116.4 (d,  $J = 23.3$  Hz), 113.0, 93.7, 89.9 (d,  $J = 2.9$  Hz), 70.5;  $^{19}\text{F NMR}$  (471 MHz,  $\text{CDCl}_3$ )  $\delta$  -109.4; IR (KBr,  $\text{cm}^{-1}$ ) 3744, 3153, 2199, 1574, 1510, 1279, 1174, 1132, 803, 689; HRMS (ESI) Calcd for  $\text{C}_{27}\text{H}_{19}\text{BrFN}_2\text{O}$  ( $\text{M}+\text{H}$ ) $^+$  485.0659, Found 485.0654.

**(E)-1-(2-((2-(benzyloxy)phenyl)ethynyl)-4-methoxyphenyl)-2-(4-bromophenyl)diazene (1y)**

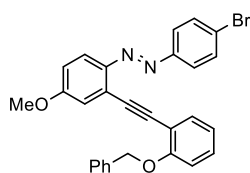

Yield 45%, red solid, m. p. 80-81 °C,  $R_f = 0.4$  (DCM/petroleum ether = 1/5);  $^1\text{H NMR}$  (500 MHz,  $\text{CDCl}_3$ )  $\delta$  7.81 (t,  $J = 8.3$  Hz, 3H), 7.62 – 7.54 (m, 1H), 7.47 (d,  $J = 8.0$  Hz, 4H), 7.29 (t,  $J = 7.3$  Hz, 3H), 7.25 – 7.21 (m, 1H), 7.16 (d,  $J = 2.9$  Hz, 1H), 7.02 – 6.91 (m, 3H), 5.23 (s, 2H), 3.86 (s, 3H);  $^{13}\text{C NMR}$  (126 MHz,  $\text{CDCl}_3$ )  $\delta$  161.8, 159.5, 151.7, 147.1, 137.0, 133.6, 132.2, 130.1, 128.5, 127.7, 126.9, 126.7, 124.8, 124.5, 121.0, 117.4, 116.4, 113.4, 113.1, 92.5, 91.1, 70.5, 55.7; IR (KBr,  $\text{cm}^{-1}$ ) 3749, 3736, 2362, 1684, 1671, 1635, 1540, 1521, 1508, 1492, 1270, 751; HRMS (ESI) Calcd for  $\text{C}_{28}\text{H}_{22}\text{BrN}_2\text{O}_2$  ( $\text{M}+\text{H}$ ) $^+$  497.0859, Found 497.0863.

**(E)-1-(2-((2-(benzyloxy)phenyl)ethynyl)-4-methylphenyl)-2-phenyldiazene (1z)**

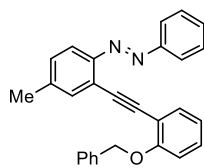

Yield 64%, red solid, m. p. 80-81 °C,  $R_f = 0.5$  (EtOAc/petroleum ether = 1/20);  $^1\text{H}$  NMR (400 MHz,  $\text{CDCl}_3$ )  $\delta$  8.09 – 8.01 (m, 2H), 7.73 (d,  $J = 8.2$  Hz, 1H), 7.62 (d,  $J = 7.2$  Hz, 1H), 7.54 (d,  $J = 9.6$  Hz, 3H), 7.44 (s, 2H), 7.39 – 7.15 (m, 6H), 7.04 – 6.94 (m, 2H), 5.28 (s, 2H), 2.45 (s, 3H);  $^{13}\text{C}$  NMR (101 MHz,  $\text{CDCl}_3$ )  $\delta$  159.4, 152.9, 150.9, 141.1, 137.2, 133.9, 133.6, 130.9, 129.78, 129.76, 129.0, 128.5, 127.7, 126.8, 124.5, 123.3, 121.0, 115.8, 113.8, 113.2, 91.9, 91.4, 70.5, 21.3; IR (KBr,  $\text{cm}^{-1}$ ) 3062, 3032, 2920, 2207, 1594, 1495, 1445, 1278, 1242, 1226, 769, 688; HRMS (ESI) Calcd for  $\text{C}_{28}\text{H}_{23}\text{N}_2\text{O}$  ( $\text{M}+\text{H}$ ) $^+$  403.1805, Found 403.1798.

**(E)-1-(2-(4-(benzyloxy)but-1-yn-1-yl)phenyl)-2-(4-bromophenyl)diazene (1aa)**

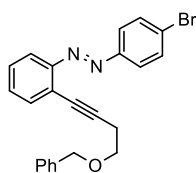

Yield 50%, red solid, m. p. 60-61 °C,  $R_f = 0.6$  (EtOAc/petroleum ether = 1/40);  $^1\text{H}$  NMR (500 MHz,  $\text{CDCl}_3$ )  $\delta$  7.79 (d,  $J = 8.4$  Hz, 2H), 7.66 (dd,  $J = 7.9, 1.5$  Hz, 1H), 7.57 (td,  $J = 5.7, 3.0$  Hz, 3H), 7.39 – 7.25 (m, 7H), 4.59 (s, 2H), 3.72 (t,  $J = 7.0$  Hz, 2H), 2.83 (t,  $J = 7.0$  Hz, 2H);  $^{13}\text{C}$  NMR (126 MHz,  $\text{CDCl}_3$ )  $\delta$  153.0, 151.6, 138.1, 133.7, 132.3, 130.9, 128.49, 128.45, 127.8, 127.7, 125.7, 124.7, 124.5, 115.9, 93.8, 78.7, 73.1, 68.5, 21.4; IR (KBr,  $\text{cm}^{-1}$ ) 3063, 3030, 2925, 2860, 2230, 1733, 1584, 1573, 1495, 1480, 1454, 1362, 1101, 1065, 763, 743; HRMS (ESI) Calcd for  $\text{C}_{23}\text{H}_{20}\text{BrN}_2\text{O}$  ( $\text{M}+\text{H}$ ) $^+$  419.0754, Found 419.0759.

**(E)-1-(2-((2-(4-bromophenyl)diazenyl)phenyl)ethynyl)phenyl)piperidine (1ab)**

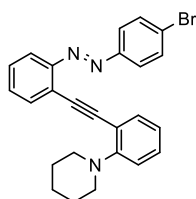

Yield 36%, red oil,  $R_f = 0.5$  (DCM/petroleum ether = 1/10);  $^1\text{H}$  NMR (400 MHz,  $\text{CDCl}_3$ )  $\delta$  7.86 (d,  $J = 8.6$  Hz, 2H), 7.75 – 7.67 (m, 2H), 7.62 (d,  $J = 8.7$  Hz, 2H), 7.55 – 7.49 (m, 1H), 7.46 – 7.41 (m, 1H), 7.41 – 7.35 (m, 1H), 7.29 – 7.25 (m, 1H), 6.94 (d,  $J = 7.7$  Hz, 2H), 3.22 – 3.16 (m, 4H), 1.71 – 1.62 (m, 4H), 1.53 – 1.44 (m, 2H);  $^{13}\text{C}$  NMR (101 MHz,  $\text{CDCl}_3$ )  $\delta$  155.5, 152.7, 151.6, 134.0, 133.4, 132.4, 130.9, 129.7, 128.6, 125.7, 124.8, 121.1, 117.9, 116.7, 116.1, 95.1, 91.7, 52.9, 26.3, 24.3; IR (KBr,  $\text{cm}^{-1}$ ) 3064, 2928, 2851, 2805, 2209, 1572, 1559, 1540, 1457, 1382, 1275, 909, 833, 749; HRMS (ESI) Calcd for  $\text{C}_{25}\text{H}_{23}\text{BrN}_3$  ( $\text{M}+\text{H}$ ) $^+$  444.1069, Found 444.1059.

**(E)-1-(2-((2-(benzylthio)phenyl)ethynyl)phenyl)-2-(4-bromophenyl)diazene (1ac)**

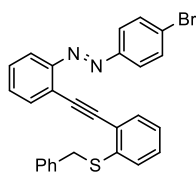

Yield 30%, red solid, m. p. 88-89 °C,  $R_f = 0.35$  (EtOAc/petroleum ether = 1/20);  $^1\text{H}$  NMR (500 MHz,  $\text{CDCl}_3$ )  $\delta$  8.17 (d,  $J = 8.5$  Hz, 2H), 8.08 (d,  $J = 8.6$  Hz, 2H), 7.90 (d,  $J = 8.3$  Hz, 2H), 7.79 – 7.71 (m, 2H), 7.66 – 7.59 (m, 4H), 7.49 (d,  $J = 8.3$  Hz, 2H), 7.32 (d,  $J = 7.4$  Hz, 2H), 7.17 (t,  $J = 7.4$  Hz, 1H), 4.19 (s, 2H);  $^{13}\text{C}$  NMR (126 MHz,  $\text{CDCl}_3$ )  $\delta$  152.7, 151.4, 142.6, 139.9, 136.7, 133.8, 133.0, 132.2, 132.1, 132.0, 130.9, 129.1, 128.9, 128.6, 127.4, 127.3, 125.5, 125.0, 123.9, 116.0, 93.5, 92.9, 37.4; IR (KBr,  $\text{cm}^{-1}$ ) 3545, 3059, 2932, 1593, 1485, 1450, 1383, 1068, 751, 703; HRMS (ESI) Calcd for  $\text{C}_{27}\text{H}_{20}\text{BrN}_2\text{S}$  ( $\text{M}+\text{H}$ ) $^+$  483.0525, Found 483.0516.

**(E)-1-(2-((2-(benzyloxy)naphthalen-1-yl)ethynyl)phenyl)-2-(4-bromophenyl)diazene (3a)**

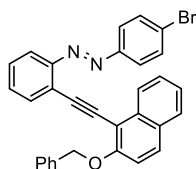

Yield 72%, red solid, m. p. 125-126 °C,  $R_f = 0.6$  (DCM/petroleum ether = 1/2);  $^1\text{H}$  NMR (500 MHz,  $\text{CDCl}_3$ )  $\delta$  8.48 – 8.42 (m, 1H), 7.94 – 7.88 (m, 2H), 7.80 – 7.73 (m, 4H), 7.58 – 7.51 (m, 4H), 7.47 (td,  $J = 7.4, 1.4$  Hz, 1H), 7.43 – 7.37 (m, 3H), 7.34 (dd,  $J = 8.3, 6.6$  Hz, 2H), 7.31 – 7.26 (m, 1H), 7.24 (d,  $J = 6.1$  Hz, 1H), 5.37

(s, 2H);  $^{13}\text{C}$  NMR (126 MHz,  $\text{CDCl}_3$ )  $\delta$  158.5, 152.8, 151.7, 137.2, 134.8, 133.5, 132.3, 131.0, 130.4, 128.9, 128.7, 128.6, 128.1, 127.9, 127.4, 127.0, 125.9, 125.7, 125.01, 124.99, 124.6, 116.0, 115.2, 107.9, 96.7, 91.0, 71.6; IR (KBr,  $\text{cm}^{-1}$ ) 3053, 2193, 1592, 1451, 1269, 1147, 1071, 801, 749, 694; HRMS (ESI) Calcd for  $\text{C}_{31}\text{H}_{22}\text{BrN}_2\text{O}$  ( $\text{M}+\text{H}$ ) $^+$  517.0910, Found 517.0901.

**Methyl (E)-4-(((1-((2-((4-bromophenyl)diazenyl)phenyl)ethynyl)naphthalen-2-yl)oxy)methyl)benzoate (3b)**

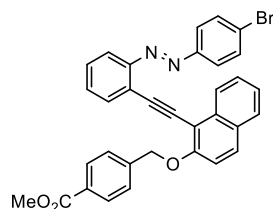

Yield 48%, red solid, m. p. 144-145 °C,  $R_f$  = 0.6 (DCM/petroleum ether = 1/1);  $^1\text{H}$  NMR (400 MHz,  $\text{CDCl}_3$ )  $\delta$  8.49 – 8.40 (m, 1H), 8.03 – 7.96 (m, 2H), 7.92 – 7.84 (m, 2H), 7.81 – 7.73 (m, 4H), 7.60 (d,  $J$  = 8.1 Hz, 2H), 7.57 – 7.51 (m, 2H), 7.48 (td,  $J$  = 7.5, 1.4 Hz, 1H), 7.46 – 7.36 (m, 3H), 7.21 (d,  $J$  = 9.1 Hz, 1H), 5.37 (s, 2H), 3.90 (s, 3H);  $^{13}\text{C}$  NMR (101 MHz,  $\text{CDCl}_3$ )  $\delta$  166.8, 158.0, 152.8, 151.6, 142.3, 134.8, 133.3, 132.3, 131.1, 130.4, 129.8, 129.6, 129.0, 128.8, 128.1, 127.5, 126.6, 125.9, 125.7, 125.0, 124.8, 124.7, 116.1, 114.9, 108.1, 96.8, 90.7, 70.9, 52.1; IR (KBr,  $\text{cm}^{-1}$ ) 3055, 2944, 2197, 1814, 1718, 1579, 1441, 1271, 1184, 1106, 1013, 806, 754; HRMS (ESI) Calcd for  $\text{C}_{33}\text{H}_{23}\text{BrN}_2\text{NaO}_3$  ( $\text{M}+\text{Na}$ ) $^+$  597.0784, Found 597.0781.

**(E)-1-(4-bromophenyl)-2-((2-((2-(naphthalen-2-ylmethoxy)naphthalen-1-yl)ethynyl)phenyl)diazene (3c)**

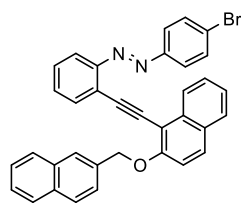

Yield 52%, red solid, m. p. 134-135 °C,  $R_f$  = 0.3 (DCM/petroleum ether = 1/1);  $^1\text{H}$  NMR (500 MHz,  $\text{CDCl}_3$ )  $\delta$  8.49 – 8.42 (m, 1H), 7.99 (s, 1H), 7.91 – 7.85 (m, 2H), 7.84 – 7.73 (m, 7H), 7.63 (dd,  $J$  = 8.5, 1.8 Hz, 1H), 7.55 – 7.48 (m, 2H), 7.48 – 7.38 (m, 6H), 7.30 (d,  $J$  = 9.0 Hz, 1H), 5.51 (s, 2H);  $^{13}\text{C}$  NMR (126 MHz,  $\text{CDCl}_3$ )  $\delta$  158.5, 152.8, 151.6, 134.8, 134.7, 133.5, 133.3, 133.1, 132.2, 131.0, 130.4, 129.0, 128.8, 128.4, 128.1, 128.0, 127.8, 127.4, 126.2, 126.0, 125.9, 125.8, 125.6, 124.94, 124.86, 124.6, 116.1, 115.3, 108.1, 96.8, 91.0, 71.8; IR (KBr,  $\text{cm}^{-1}$ ) 3053, 2937, 2199, 1572, 1507, 1468, 1330, 1272, 1068, 812, 742; HRMS (ESI) Calcd for  $\text{C}_{35}\text{H}_{24}\text{BrN}_2\text{O}$  ( $\text{M}+\text{H}$ ) $^+$  567.1067, Found 567.1074.

**(E)-1-(4-chlorophenyl)-2-((2-((3,5-dibromobenzyl)oxy)naphthalen-1-yl)ethynyl)phenyl)diazene (3d)**

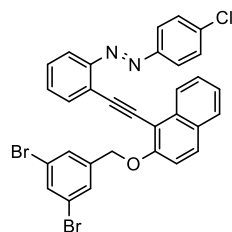

Yield 50%, red solid, m. p. 161-162 °C,  $R_f$  = 0.6 (DCM/petroleum ether = 1/1);  $^1\text{H}$  NMR (500 MHz,  $\text{CDCl}_3$ )  $\delta$  8.49 – 8.44 (m, 1H), 8.01 – 7.96 (m, 2H), 7.90 – 7.79 (m, 4H), 7.69 (s, 2H), 7.59 (s, 1H), 7.55 – 7.49 (m, 1H), 7.49 – 7.40 (m, 5H), 7.27 (s, 1H), 5.29 (s, 2H);  $^{13}\text{C}$  NMR (126 MHz,  $\text{CDCl}_3$ )  $\delta$  157.7, 152.8, 151.3, 141.1, 137.2, 134.7, 133.6, 133.5, 131.1, 130.5, 129.3, 129.1, 128.9, 128.5, 128.1, 127.5, 125.9, 124.9, 124.7, 124.6, 123.1, 116.0, 114.9, 108.3, 97.0, 90.3, 70.0; IR (KBr,  $\text{cm}^{-1}$ ) 2999, 2193, 1721, 1583, 1423, 1267, 1144, 1093, 835, 800, 752, 660; HRMS (ESI) Calcd for  $\text{C}_{31}\text{H}_{20}\text{Br}_2\text{ClN}_2\text{O}$  ( $\text{M}+\text{H}$ ) $^+$  628.9626, Found 628.9619.

**(E)-1-(4-bromophenyl)-2-(2-((2-((3,5-difluorobenzyl)oxy)naphthalen-1-yl)ethynyl)phenyl)diazene**

**(3e)**

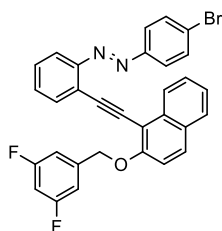

Yield 55%, red solid, m. p. 146-147 °C,  $R_f = 0.3$  (DCM/petroleum ether = 1/1);  $^1\text{H NMR}$  (500 MHz,  $\text{CDCl}_3$ )  $\delta$  8.46 (d,  $J = 7.5$  Hz, 1H), 7.91 (d,  $J = 8.3$  Hz, 2H), 7.88 – 7.74 (m, 5H), 7.59 (d,  $J = 8.3$  Hz, 2H), 7.52 (t,  $J = 7.6$  Hz, 1H), 7.47 – 7.40 (m, 3H), 7.13 (d,  $J = 7.0$  Hz, 2H), 6.73 (t,  $J = 8.8$  Hz, 1H), 5.33 (s, 2H);  $^{13}\text{C NMR}$  (126 MHz,  $\text{CDCl}_3$ )  $\delta$  163.2 (dd,  $J = 249.0, 12.7$  Hz), 157.7, 152.8, 151.6, 141.2 (t,  $J = 9.1$  Hz), 134.8, 133.3, 132.3, 131.1, 130.5, 129.1, 128.9, 128.1, 127.5, 125.9, 125.7, 125.0, 124.9, 124.7, 116.1, 114.8, 109.5 (dd,  $J = 19.7, 6.1$  Hz), 108.2, 103.1 (t,  $J = 25.3$  Hz), 96.9, 90.5, 70.2;  $^{19}\text{F NMR}$  (471 MHz,  $\text{CDCl}_3$ )  $\delta$  -109.3; IR (KBr,  $\text{cm}^{-1}$ ) 3780, 3545, 1595, 1439, 1268, 1113, 755, 540; HRMS (ESI) Calcd for  $\text{C}_{31}\text{H}_{20}\text{BrF}_2\text{N}_2\text{O}$  ( $\text{M}+\text{H}$ ) $^+$  553.0722, Found 553.0713.

**(E)-1-(4-bromophenyl)-2-(2-((2-((3,5-dichlorobenzyl)oxy)naphthalen-1-yl)ethynyl)phenyl)diazene**

**(3f)**

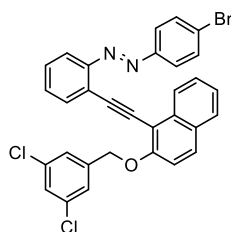

Yield 66%, red solid, m. p. 158-159 °C,  $R_f = 0.4$  DCM/petroleum ether = 1/1);  $^1\text{H NMR}$  (500 MHz,  $\text{CDCl}_3$ )  $\delta$  8.49 – 8.43 (m, 1H), 7.91 (d,  $J = 8.6$  Hz, 2H), 7.89 – 7.78 (m, 4H), 7.60 (d,  $J = 8.6$  Hz, 2H), 7.55 – 7.47 (m, 3H), 7.47 – 7.40 (m, 3H), 7.30 – 7.26 (m, 2H), 5.29 (s, 2H);  $^{13}\text{C NMR}$  (126 MHz,  $\text{CDCl}_3$ )  $\delta$  157.8, 152.8, 151.6, 140.6, 135.2, 134.7, 133.5, 132.3, 131.1, 130.5, 129.1, 128.9, 128.1, 128.0, 127.5, 125.9, 125.7, 125.2, 124.94, 124.90, 124.6, 116.1, 114.8, 108.3, 97.0, 90.4, 70.2; IR (KBr,  $\text{cm}^{-1}$ ) 3077, 1574, 1497, 1475, 1267, 1236, 1146, 835, 790, 745, 696, 631; HRMS (ESI) Calcd for  $\text{C}_{31}\text{H}_{19}\text{BrCl}_2\text{N}_2\text{NaO}$  ( $\text{M}+\text{Na}$ ) $^+$  606.9950, Found 606.9953.

**dimethyl (E)-5-(((1-((2-((4-bromophenyl)diazenyl)phenyl)ethynyl)naphthalen-2-yl)oxy)methyl)-isophthalate (3g)**

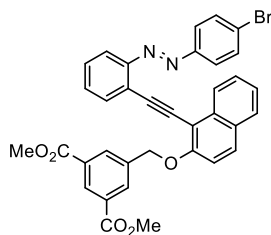

Yield 68%, red solid, m. p. 140-141 °C,  $R_f = 0.6$  (DCM/EtOAc /petroleum ether = 40/1/40);  $^1\text{H NMR}$  (500 MHz,  $\text{CDCl}_3$ )  $\delta$  8.55 (s, 1H), 8.48 – 8.43 (m, 1H), 8.39 (s, 2H), 7.87 – 7.75 (m, 6H), 7.52 (d,  $J = 8.4$  Hz, 2H), 7.48 (t,  $J = 7.4$  Hz, 1H), 7.45 – 7.40 (m, 3H), 7.29 (d,  $J = 9.0$  Hz, 1H), 5.38 (s, 2H), 3.83 (s, 6H);  $^{13}\text{C NMR}$  (126 MHz,  $\text{CDCl}_3$ )  $\delta$  166.0, 158.0, 152.8, 151.5, 138.1, 134.7, 133.6, 132.20, 132.16, 131.0, 130.9, 130.5, 130.3, 129.1, 128.8, 128.2, 127.5, 125.9, 125.6, 124.9, 124.8, 115.9, 115.1, 108.4, 97.0, 90.5, 70.9, 52.3; IR (KBr,  $\text{cm}^{-1}$ ) 2995, 1719, 1562, 1436, 1271, 1107, 806, 754, 548; HRMS (ESI) Calcd for  $\text{C}_{35}\text{H}_{26}\text{BrN}_2\text{O}_5$  ( $\text{M}+\text{H}$ ) $^+$  633.1020, Found 633.1028.

**(E)-1-(4-bromophenyl)-2-(2-((2-((3,5-dimethoxybenzyl)oxy)naphthalen-1-yl)ethynyl)phenyl)diazene**

**(3h)**

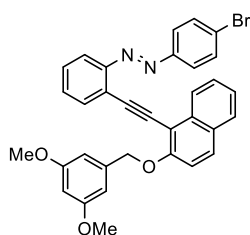

Yield 45% red solid, m. p. 70-71 °C,  $R_f = 0.6$  (DCM/petroleum ether = 1/1);  $^1\text{H NMR}$  (500 MHz,  $\text{CDCl}_3$ )  $\delta$  8.48 – 8.42 (m, 1H), 7.93 – 7.88 (m, 2H), 7.83 (dd,  $J = 7.6, 1.5$  Hz, 1H), 7.78 (d,  $J = 8.5$  Hz, 3H), 7.59 – 7.53 (m, 2H), 7.47 (td,  $J = 7.4, 1.4$  Hz, 1H), 7.44 – 7.38 (m, 3H), 7.26 (d,  $J = 9.1$  Hz, 1H), 6.71 (d,  $J = 2.4$  Hz, 2H), 6.36 (t,  $J = 2.4$  Hz, 1H), 5.32 (s, 2H), 3.72 (s, 6H);  $^{13}\text{C NMR}$

NMR (101 MHz, CDCl<sub>3</sub>)  $\delta$  161.0, 158.4, 152.8, 151.6, 139.6, 134.8, 133.6, 132.3, 131.0, 130.4, 128.9, 128.8, 128.1, 127.4, 125.8, 125.7, 125.0, 124.9, 124.6, 116.0, 115.1, 107.9, 104.7, 99.8, 96.6, 90.9, 71.4, 55.4; IR (KBr, cm<sup>-1</sup>) 3057, 2999, 2942, 2839, 2201, 1599, 1467, 1381, 1276, 1206, 1152, 1064, 1012, 824, 755; HRMS (ESI) Calcd for C<sub>33</sub>H<sub>25</sub>BrN<sub>2</sub>NaO<sub>3</sub> (M+Na)<sup>+</sup> 599.0941, Found 599.0943.

### Procedure for preparation of azaenyne (imine)

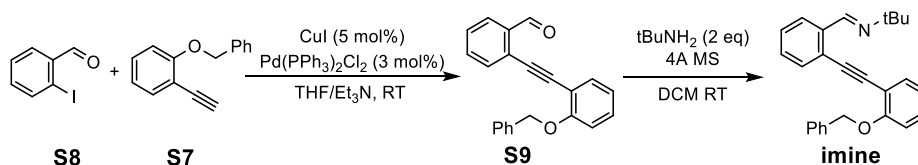

In a Schlenk tube with a magnetic bar under nitrogen atmosphere, **S8** (1.0 eq.), **S7** (1.1 eq), CuI (5 mol%), Pd(PPh<sub>3</sub>)<sub>2</sub>Cl<sub>2</sub> (3 mol%) were added, and Et<sub>3</sub>N (2.5M) and THF (0.5 M) as co-solvent were added to the reaction mixture, The mixture was stirred at room temperature until the substrate **S8** was completely consumed. After rapid filtration of silica gel, the solvent was evaporated by rotary evaporator, and the residue was purified by flash column chromatography on silica gel using EtOAc/petroleum ether as eluent to afford the product **S9**.

In a Schlenk tube with a magnetic bar under nitrogen atmosphere, 4 Å MS (100 mg) was activated by heat gun. After cooling the tube to room temperature, **S9** (1 eq), tBuNH<sub>2</sub> (2 eq), dry DCM (0.25 M) were added. The mixtures were stirred at room temperature until the starting material was consumed. After rapid filtration of silica gel, the solvent was evaporated by rotary evaporator, and the residue was used as substrate directly.

### *(E)*-1-(2-((2-(benzyloxy)phenyl)ethynyl)phenyl)-*N*-(*tert*-butyl)methanimine

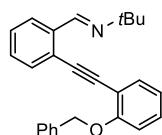

Yield 80%, light yellow oil, R<sub>f</sub> = 0.7 (EtOAc/petroleum ether = 1/20); <sup>1</sup>H NMR (500 MHz, CDCl<sub>3</sub>)  $\delta$  8.97 (s, 1H), 8.12 – 8.05 (m, 1H), 7.54 (dd, *J* = 6.0, 3.0 Hz, 1H), 7.51 (dd, *J* = 7.6, 1.5 Hz, 1H), 7.47 (d, *J* = 7.4 Hz, 2H), 7.38 – 7.32 (m, 4H), 7.28 (dd, *J* = 9.6, 7.1 Hz, 2H), 6.98 – 6.91 (m, 2H), 5.23 (s, 2H), 1.26 (s, 9H); <sup>13</sup>C NMR (126 MHz, CDCl<sub>3</sub>)  $\delta$  159.2, 154.6, 137.0, 133.4, 132.4, 129.9, 129.7, 128.6, 128.5, 127.8, 126.9, 126.8, 125.9, 124.5, 121.0, 113.2, 113.0, 91.4, 90.9, 70.4, 57.7, 29.7; IR (KBr, cm<sup>-1</sup>) 3064, 3033, 2964, 2925, 2865, 2745, 2212, 1695, 1636, 1590, 1488, 1451, 1379, 754; HRMS (ESI) Calcd for C<sub>26</sub>H<sub>26</sub>NO (M+H)<sup>+</sup> 368.2009, Found 368.2011.

### Procedure for preparation of azaenyne (triazene)

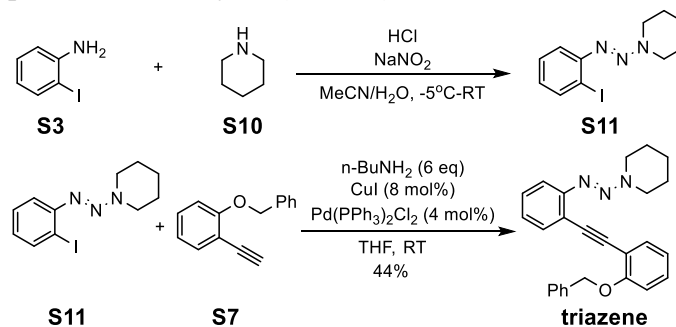

The *o*-iodoaniline **S3** (23 mmol, 1.0 eq.) was dissolved in a 2:1 mixture of acetonitrile–water (30 mL) and cooled to 0 °C. Concentrated aqueous HCl (7.6 mL, 91 mmol, 4.0 eq.) was added dropwise. The

reaction mixture was further cooled to  $-5\text{ }^{\circ}\text{C}$  and aqueous solution of  $\text{NaNO}_2$  (2.4 g, 34 mmol in 30 mL water, 1.5 eq.) was introduced slowly, while maintaining the reaction temperature below  $0\text{ }^{\circ}\text{C}$ . After the addition was complete, the reaction mixture was stirred at between  $-5\text{ }^{\circ}\text{C}$  and  $0\text{ }^{\circ}\text{C}$  for 30 minutes and was added slowly to a stirred solution of piperidine **S10** (5.6 mL, 57 mmol, 2.5 eq.) and potassium carbonate (16 g, 119 mmol, 5.2 eq) in a 2:1 mixture of acetonitrile and water (120 mL) at  $0\text{ }^{\circ}\text{C}$ . The reaction mixture was allowed to warm to room temperature and was stirred at that temperature for 1 hour. The resulting solution was extracted three times using ethyl acetate (20 mL  $\times$  3). The combined organic layer was washed with brine, dried over  $\text{Na}_2\text{SO}_4$ , filtered and concentrated under reduced pressure. The residue was purified by flash silica gel column chromatography (petroleum ether–ethyl acetate = 30:1) to give the corresponding ortho-iodo triazene substrate **S11**.

Ortho-iodo triazene substrate **S11** (1.0 eq),  $\text{Pd}(\text{PPh}_3)_2\text{Cl}_2$  (0.04 equiv),  $\text{CuI}$  (0.08 equiv) and  $n\text{BuNH}_2$  (6.0 mmol, 6.0 equiv) were dissolved in anhydrous THF (0.1 M) under  $\text{N}_2$  atmosphere. To the resulting solution terminal alkyne **S7** (1.2 equiv) was added dropwise. The mixture was stirred at room temperature. After the reaction was completed (detected by TLC), saturated  $\text{NH}_4\text{Cl}$  aqueous solution was added. The organic layer was separated, and the aqueous layer was extracted twice with ethyl acetate. The combined organic layers were dried over  $\text{Na}_2\text{SO}_4$  and concentrated in vacuo. The crude residue was purified by column chromatography on silica gel to afford desired triazene product.

***(E)-1-((2-((2-(benzyloxy)phenyl)ethynyl)phenyl)diazenyl)piperidine***

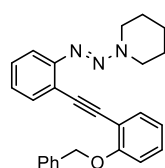

Yield 44%, white solid, m. p.  $96\text{--}97\text{ }^{\circ}\text{C}$ ,  $R_f = 0.35$  (EtOAc/petroleum ether = 1/20);  $^1\text{H NMR}$  (500 MHz,  $\text{CDCl}_3$ )  $\delta$  7.59 – 7.42 (m, 5H), 7.32 (t,  $J = 7.4\text{ Hz}$ , 2H), 7.26 (t,  $J = 7.9\text{ Hz}$ , 2H), 7.22 – 7.17 (m, 1H), 7.09 (t,  $J = 7.4\text{ Hz}$ , 1H), 6.95 – 6.86 (m, 2H), 5.20 (s, 2H), 3.79 (s, 4H), 1.61 (s, 6H);  $^{13}\text{C NMR}$  (126 MHz,  $\text{CDCl}_3$ )  $\delta$  159.1, 151.7, 137.3, 133.5, 133.1, 129.3, 128.8, 128.5, 127.6, 126.8, 125.2, 121.0, 118.8, 117.0, 114.4, 113.3, 92.4, 90.1, 70.5, 52.2, 44.7, 25.4, 24.4; IR (KBr,  $\text{cm}^{-1}$ ) 3061, 2936, 2855, 2211, 1586, 1489, 1419, 1363, 1287, 1226, 1178, 1101, 853, 751; HRMS (ESI) Calcd for  $\text{C}_{26}\text{H}_{26}\text{N}_3\text{O}$  ( $\text{M}+\text{H}$ ) $^+$  396.2071, Found 396.2075.

**3.3 Procedures for initial investigation of cycloisomerization of azaenyne (imine, triazene and diazene)**

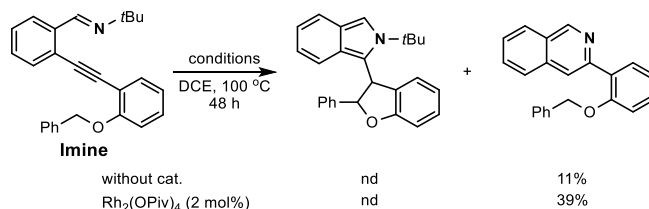

In a Schlenk tube with a magnetic bar under nitrogen atmosphere, imine (0.2 mmol, 73 mg), DCE (0.1 M, 2 ml) were added with or without  $\text{Rh}_2(\text{OAc})_4$  (2 mol%, 2.64 mg). The mixtures were stirred at  $100\text{ }^{\circ}\text{C}$  for 48 h. After rapid filtration of silica gel, the solvent was evaporated by rotary evaporator, and the residue was purified by flash column chromatography on silica gel using EtOAc/petroleum ether as eluent to afford the product.

### 3-(2-(benzyloxy)phenyl)isoquinoline

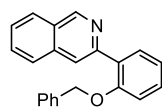

Yield 39%, white solid, m. p. 80-81 °C,  $R_f = 0.5$  (EtOAc/petroleum ether = 1/10);  $^1\text{H}$  NMR (500 MHz,  $\text{CDCl}_3$ )  $\delta$  9.37 (s, 1H), 8.35 (s, 1H), 8.05 – 7.95 (m, 2H), 7.75 (d,  $J = 8.2$  Hz, 1H), 7.67 (t,  $J = 7.3$  Hz, 1H), 7.59 (t,  $J = 7.3$  Hz, 1H), 7.41 (d,  $J = 7.3$  Hz, 2H), 7.39 – 7.27 (m, 4H), 7.16 (t,  $J = 7.4$  Hz, 1H), 7.11 (d,  $J = 8.2$  Hz, 1H), 5.19 (s, 2H);  $^{13}\text{C}$  NMR (101 MHz,  $\text{CDCl}_3$ )  $\delta$  156.3, 151.8, 148.7, 137.1, 136.2, 131.5, 130.4, 129.6, 129.3, 128.5, 127.8, 127.5, 127.4, 127.2, 127.1, 127.0, 121.59, 121.57, 113.4, 70.8; IR (KBr,  $\text{cm}^{-1}$ ) 3445, 3059, 3032, 2919, 2852, 1649, 1574, 1492, 1453, 1279, 1233, 1118, 1021, 754, 697; HRMS (ESI) Calcd for  $\text{C}_{22}\text{H}_{18}\text{NO}$  ( $\text{M}+\text{H}$ ) $^+$  312.1383, Found 312.1380.

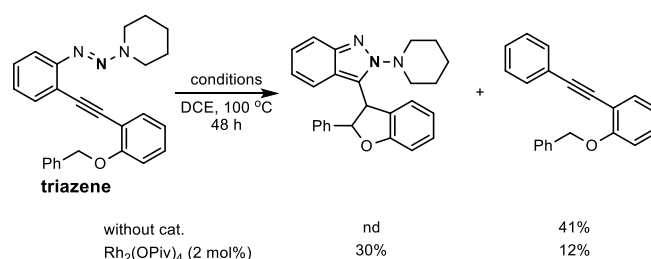

In a Schlenk tube with a magnetic bar under nitrogen atmosphere, triazene (0.2 mmol, 79 mg), DCE (0.1 M, 2 ml) were added with or without  $\text{Rh}_2(\text{OAc})_4$  (2 mol%, 2.64 mg). The mixtures were stirred at 100 °C for 48 h. After rapid filtration of silica gel, the solvent was evaporated by rotary evaporator, and the residue was purified by flash column chromatography on silica gel using EtOAc/petroleum ether as eluent to afford the product.

### 3-(2-phenyl-2,3-dihydrobenzofuran-3-yl)-2-(piperidin-1-yl)-2H-indazole

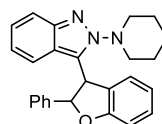

Yield 30%, white solid, m. p. 142-143 °C,  $R_f = 0.5$  (EtOAc/petroleum ether = 1/20);  $^1\text{H}$  NMR (400 MHz,  $\text{CDCl}_3$ )  $\delta$  7.48 (d,  $J = 8.7$  Hz, 1H), 7.34 (t,  $J = 7.6$  Hz, 1H), 7.15 – 7.00 (m, 8H), 6.95 (t,  $J = 7.3$  Hz, 1H), 6.78 – 6.71 (m, 1H), 6.39 (d,  $J = 7.4$  Hz, 1H), 6.01 (d,  $J = 8.1$  Hz, 1H), 5.58 (d,  $J = 8.5$  Hz, 1H), 3.19 (s, 1H), 3.06 (s, 2H), 1.94 – 1.68 (m, 5H), 1.60 (s, 1H), 1.30 (s, 1H);  $^{13}\text{C}$  NMR (101 MHz,  $\text{CDCl}_3$ )  $\delta$  160.5, 145.2, 136.4, 130.1, 129.6, 128.3, 127.94, 127.86, 126.9, 126.2, 125.8, 121.7, 121.2, 120.4, 119.3, 117.0, 110.2, 88.6, 57.6, 55.1, 44.8, 26.2, 26.0, 23.4; IR (KBr,  $\text{cm}^{-1}$ ) 3055, 2937, 2852, 1599, 1470, 1383, 1267, 1157, 974, 746, 694; HRMS (ESI) Calcd for  $\text{C}_{26}\text{H}_{26}\text{N}_3\text{O}$  ( $\text{M}+\text{H}$ ) $^+$  396.2071, Found 396.2070.

### 1-(benzyloxy)-2-(phenylethynyl)benzene

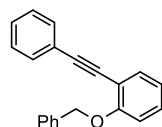

Yield 41%, light yellow oil,  $R_f = 0.8$  (EtOAc/petroleum ether = 1/20);  $^1\text{H}$  NMR (500 MHz,  $\text{CDCl}_3$ )  $\delta$  7.56 – 7.48 (m, 5H), 7.38 (t,  $J = 7.6$  Hz, 2H), 7.36 – 7.26 (m, 5H), 6.96 (t,  $J = 7.3$  Hz, 2H), 5.21 (s, 2H);  $^{13}\text{C}$  NMR (126 MHz,  $\text{CDCl}_3$ )  $\delta$  159.3, 137.1, 133.3, 131.6, 129.6, 128.5, 128.3, 128.1, 127.8, 126.9, 123.7, 121.0, 113.5, 112.9, 93.8, 85.9, 70.5.



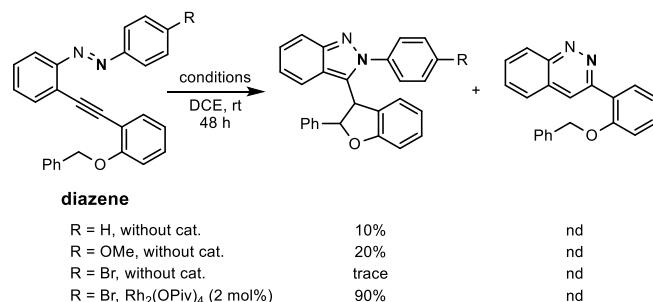

In a Schlenk tube with a magnetic bar under nitrogen atmosphere, diazenes (0.2 mmol), DCE (0.1 M, 2 ml) were added with or without Rh<sub>2</sub>(OAc)<sub>4</sub> (2 mol%, 2.64 mg). The mixtures were stirred at room temperature for 48 h. After rapid filtration of silica gel, the solvent was evaporated (without heated) by rotary evaporator, and the residue was purified by flash column chromatography on silica gel using EtOAc/petroleum ether as eluent to afford the products.

### 3.4 General procedures for cycloisomerization of azaenyne **1**

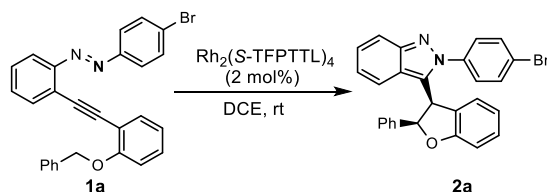

In a Schlenk tube with a magnetic bar under nitrogen atmosphere, **1a** (0.2 mmol, 93.4 mg), DCE (0.1 M, 2 ml), Rh<sub>2</sub>(*S*-TFPPTTL)<sub>4</sub> (2 mol%, 7.1 mg) were added. The mixtures were stirred at room temperature until the starting material was consumed (TLC detected). After rapid filtration of silica gel, the solvent was evaporated by rotary evaporator, and the residue was purified by flash column chromatography on silica gel using EtOAc/petroleum ether as eluent to afford the product **2a** (0.196 mmol, 91.5 mg).

The procedures of other substrates **1**, were similar with that mentioned above.

#### 2-(4-bromophenyl)-3-((2*R*,3*R*)-2-phenyl-2,3-dihydrobenzofuran-3-yl)-2*H*-indazole (**2a**)

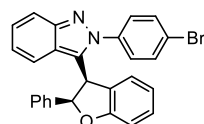

Yield 98%, > 99:1 dr, pale solid, m. p. 145-146 °C, *R<sub>f</sub>* = 0.4 (EtOAc/petroleum ether = 1/10); <sup>1</sup>H NMR (400 MHz, CDCl<sub>3</sub>) δ 7.54 (d, *J* = 8.2 Hz, 2H), 7.44 (d, *J* = 8.8 Hz, 1H), 7.29 (t, *J* = 7.8 Hz, 1H), 7.12 – 7.06 (m, 2H), 7.01 (t, *J* = 7.6 Hz, 2H), 6.94 – 6.89 (m, 5H), 6.76 (d, *J* = 7.6 Hz, 2H), 6.70 (t, *J* = 7.6 Hz, 1H), 6.41 (d, *J* = 8.7 Hz, 1H), 5.70 (d, *J* = 8.6 Hz, 1H), 5.21 (d, *J* = 8.5 Hz, 1H); <sup>13</sup>C NMR (101 MHz, CDCl<sub>3</sub>) δ 160.2, 148.7, 138.5, 135.9, 133.1, 132.3, 129.9, 128.5, 128.4, 127.9, 127.2, 126.8, 126.5, 126.1, 123.3, 122.0, 121.92, 121.88, 120.6, 117.5, 110.3, 88.1, 45.6; IR (KBr, cm<sup>-1</sup>) 3061, 2962, 2926, 1726, 1597, 1514, 1495, 1478, 1379, 1264, 1233, 1070, 1013, 833, 747; HRMS (ESI) Calcd for C<sub>27</sub>H<sub>19</sub>BrN<sub>2</sub>NaO (M+Na)<sup>+</sup> 489.0573, Found 489.0579; HPLC: INA column, 90:10 hexanes:isopropanol, 1.00 mL/min, *t<sub>R</sub>* = major: 21.4 min, minor: 19.6 min, 98:2 er; [α]<sub>D</sub><sup>24</sup> 65.4° (c 0.29, CH<sub>2</sub>Cl<sub>2</sub>).

**2-(4-bromophenyl)-3-((2R,3R)-2-(p-tolyl)-2,3-dihydrobenzofuran-3-yl)-2H-indazole (2b)**

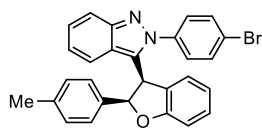

Yield 87%, > 99:1 dr, pale solid, m. p. 160-161 °C,  $R_f = 0.4$  (EtOAc/petroleum ether = 1/10);  $^1\text{H NMR}$  (400 MHz,  $\text{CDCl}_3$ )  $\delta$  7.53 (d,  $J = 8.2$  Hz, 2H), 7.46 (d,  $J = 8.7$  Hz, 1H), 7.28 (t,  $J = 7.8$  Hz, 1H), 7.11 – 7.07 (m, 2H), 7.01 (d,  $J = 8.1$  Hz, 1H), 6.95 – 6.82 (m, 3H), 6.79 – 6.69 (m, 3H), 6.65 (d,  $J = 7.8$  Hz, 2H), 6.42 (d,  $J = 8.7$  Hz, 1H), 5.66 (d,  $J = 8.5$  Hz, 1H), 5.13 (d,  $J = 8.5$  Hz, 1H), 2.11 (s, 3H);  $^{13}\text{C NMR}$  (101 MHz,  $\text{CDCl}_3$ )  $\delta$  160.2, 148.6, 138.4, 138.3, 133.4, 132.8, 132.3, 129.9, 128.7, 128.6, 127.4, 126.9, 126.5, 126.2, 123.3, 122.0, 121.91, 121.87, 120.7, 117.4, 110.3, 88.2, 45.5, 21.1; IR (KBr,  $\text{cm}^{-1}$ ) 3053, 2922, 1610, 1596, 1515, 1495, 1477, 1461, 1380, 1264, 1233, 1070, 1013, 833, 750; HRMS (ESI) Calcd for  $\text{C}_{28}\text{H}_{22}\text{BrN}_2\text{O}$  ( $\text{M}+\text{H}$ ) $^+$  481.0910, Found 481.0906; HPLC: WHELK column, 90:10 hexanes:isopropanol, 0.80 mL/min,  $t_R$  = major: 20.1 min, minor: 18.1 min, 98:2 er;  $[\alpha]_D^{24}$  65.8° (c 0.29,  $\text{CH}_2\text{Cl}_2$ ).

**2-(4-bromophenyl)-3-((2R,3R)-2-(4-methoxyphenyl)-2,3-dihydrobenzofuran-3-yl)-2H-indazole (2c)**

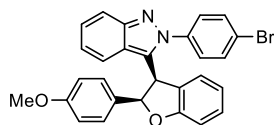

Yield 97%, > 99:1 dr, pale solid, m. p. 152-153 °C,  $R_f = 0.4$  (EtOAc/petroleum ether = 1/8);  $^1\text{H NMR}$  (400 MHz,  $\text{CDCl}_3$ )  $\delta$  7.61 (d,  $J = 8.2$  Hz, 2H), 7.54 (d,  $J = 8.9$  Hz, 1H), 7.36 (t,  $J = 7.8$  Hz, 1H), 7.18 (d,  $J = 7.1$  Hz, 2H), 7.08 (d,  $J = 8.1$  Hz, 1H), 7.02 – 6.89 (m, 3H), 6.82 – 6.75 (m, 3H), 6.54 (d,  $J = 8.7$  Hz, 2H), 6.47 (d,  $J = 8.6$  Hz, 1H), 5.73 (d,  $J = 8.4$  Hz, 1H), 5.19 (d,  $J = 8.4$  Hz, 1H), 3.67 (s, 3H);  $^{13}\text{C NMR}$  (101 MHz,  $\text{CDCl}_3$ )  $\delta$  160.1, 159.7, 148.7, 138.4, 133.5, 132.3, 129.9, 128.6, 128.3, 127.8, 126.5, 126.2, 123.3, 122.1, 122.0, 121.9, 120.6, 117.6, 113.4, 110.3, 88.1, 55.2, 55.2, 45.5; IR (KBr,  $\text{cm}^{-1}$ ) 3054, 2960, 2932, 2837, 1727, 1611, 1596, 1515, 1495, 1477, 1380, 1302, 1252, 1175, 1013, 831, 750; HRMS (ESI) Calcd for  $\text{C}_{28}\text{H}_{22}\text{BrN}_2\text{O}_2$  ( $\text{M}+\text{H}$ ) $^+$  497.0859, Found 497.0849; HPLC: INA column, 90:10 hexanes:isopropanol, 1.00 mL/min,  $t_R$  = major: 23.3 min, minor: 25.1 min, 97:3 er;  $[\alpha]_D^{24}$  34.8° (c 0.17,  $\text{CH}_2\text{Cl}_2$ ).

**2-(4-bromophenyl)-3-((2R,3R)-2-(4-fluorophenyl)-2,3-dihydrobenzofuran-3-yl)-2H-indazole (2d)**

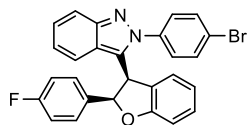

Yield 88%, > 99:1 dr, pale solid, m. p. 174-175 °C,  $R_f = 0.4$  (EtOAc/petroleum ether = 1/10);  $^1\text{H NMR}$  (400 MHz,  $\text{CDCl}_3$ )  $\delta$  7.57 (d,  $J = 8.1$  Hz, 2H), 7.46 (d,  $J = 8.8$  Hz, 1H), 7.30 (t,  $J = 7.8$  Hz, 1H), 7.13 – 7.07 (m, 2H), 7.02 (d,  $J = 8.0$  Hz, 1H), 6.98 – 6.87 (m, 3H), 6.75 – 6.70 (m, 3H), 6.62 (t,  $J = 8.5$  Hz, 2H), 6.38 (d,  $J = 8.7$  Hz, 1H), 5.68 (d,  $J = 8.6$  Hz, 1H), 5.22 (d,  $J = 8.6$  Hz, 1H);  $^{13}\text{C NMR}$  (101 MHz,  $\text{CDCl}_3$ )  $\delta$  162.5 (d,  $J = 247.8$  Hz), 160.0, 148.7, 138.4, 132.8, 132.5, 131.8 (d,  $J = 3.1$  Hz), 130.0, 128.5 (d,  $J = 8.4$  Hz), 128.4, 126.9, 126.6, 126.2, 123.4, 122.11, 122.08, 122.0, 120.4, 117.6, 114.9 (d,  $J = 21.6$  Hz), 110.3, 87.4, 45.5;  $^{19}\text{F NMR}$  (376 MHz,  $\text{CDCl}_3$ )  $\delta$  -112.9; IR (KBr,  $\text{cm}^{-1}$ ) 3056, 2926, 1624, 1607, 1513, 1495, 1380, 1265, 1226, 1158, 1114, 1070, 832, 746; HRMS (ESI) Calcd for  $\text{C}_{27}\text{H}_{18}\text{BrFN}_2\text{NaO}$  ( $\text{M}+\text{Na}$ ) $^+$  507.0479, Found 507.0476; HPLC: WHELK column, 90:10 hexanes:isopropanol, 0.80 mL/min,  $t_R$  = major: 18.4 min, minor: 17.4 min, 99:1 er;  $[\alpha]_D^{24}$  60.8° (c 0.26,  $\text{CH}_2\text{Cl}_2$ ).

**2-(4-bromophenyl)-3-((2R,3R)-2-(4-chlorophenyl)-2,3-dihydrobenzofuran-3-yl)-2H-indazole (2e)**

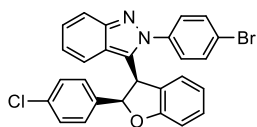

Yield 97%, > 99:1 dr, pale solid, m. p. 168-169 °C,  $R_f = 0.5$  (DCM/petroleum ether = 1/1);  $^1\text{H NMR}$  (500 MHz,  $\text{CDCl}_3$ )  $\delta$  7.66 (d,  $J = 8.1$  Hz, 2H), 7.54 (d,  $J = 8.7$  Hz, 1H), 7.38 (t,  $J = 7.9$  Hz, 1H), 7.23 – 7.14 (m, 2H), 7.10 (d,  $J = 8.2$  Hz, 1H), 7.07 – 6.93 (m, 5H), 6.86 – 6.71 (m, 3H), 6.46 (d,  $J = 8.7$  Hz, 1H), 5.75 (d,  $J = 8.6$  Hz, 1H), 5.31 (d,  $J = 8.6$  Hz, 1H);  $^{13}\text{C NMR}$  (126 MHz,  $\text{CDCl}_3$ )  $\delta$  159.9, 148.7, 138.4, 134.5, 134.2, 132.7, 132.5, 130.0, 128.4, 128.1, 128.0, 126.9, 126.6, 126.1, 123.4, 122.1, 122.0, 120.4, 117.6, 110.4, 87.3, 45.5; IR (KBr,  $\text{cm}^{-1}$ ) 3053, 2925, 2853, 1598, 1515, 1494, 1477, 1380, 1233, 1090, 1013, 830, 746; HRMS (ESI) Calcd for  $\text{C}_{27}\text{H}_{19}\text{BrClN}_2\text{O}$  ( $\text{M}+\text{H}$ ) $^+$  501.0364, Found 501.0366; HPLC: INA column, 90:10 hexanes:isopropanol, 1.00 mL/min,  $t_R =$  major: 17.8 min, minor: 20.1 min, > 99:1 er;  $[\alpha]_D^{24}$  32.4° (c 0.056,  $\text{CH}_2\text{Cl}_2$ ).

**2-(4-bromophenyl)-3-((2R,3R)-2-(4-bromophenyl)-2,3-dihydrobenzofuran-3-yl)-2H-indazole (2f)**

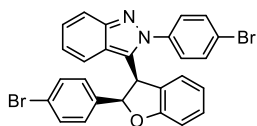

Yield 96%, > 99:1 dr, pale solid, m. p. 193-194 °C,  $R_f = 0.5$  (DCM/petroleum ether = 1/1);  $^1\text{H NMR}$  (500 MHz,  $\text{CDCl}_3$ )  $\delta$  7.66 (d,  $J = 8.1$  Hz, 2H), 7.54 (d,  $J = 8.8$  Hz, 1H), 7.38 (t,  $J = 7.8$  Hz, 1H), 7.19 (t,  $J = 8.5$  Hz, 2H), 7.14 (d,  $J = 8.1$  Hz, 2H), 7.10 (d,  $J = 8.1$  Hz, 1H), 7.08 – 6.98 (m, 3H), 6.79 (t,  $J = 7.7$  Hz, 1H), 6.71 (d,  $J = 8.1$  Hz, 2H), 6.45 (d,  $J = 8.6$  Hz, 1H), 5.73 (d,  $J = 8.6$  Hz, 1H), 5.31 (d,  $J = 9.1$  Hz, 1H);  $^{13}\text{C NMR}$  (126 MHz,  $\text{CDCl}_3$ )  $\delta$  159.9, 148.7, 138.4, 135.0, 132.6, 132.5, 131.0, 130.0, 128.39, 128.35, 126.9, 126.6, 126.1, 123.4, 122.4, 122.1, 122.0, 120.3, 117.6, 110.4, 87.4, 45.4; IR (KBr,  $\text{cm}^{-1}$ ) 3053, 2963, 2925, 1624, 1597, 1515, 1494, 1462, 1407, 1380, 1264, 1233, 1070, 1012, 831, 736; HRMS (ESI) Calcd for  $\text{C}_{27}\text{H}_{19}\text{Br}_2\text{N}_2\text{O}$  ( $\text{M}+\text{H}$ ) $^+$  544.9859, Found 544.9853; HPLC: INA column, 90:10 hexanes:isopropanol, 1.00 mL/min,  $t_R =$  major: 17.9 min, minor: 21.2 min, > 99:1 er;  $[\alpha]_D^{24}$  6.0° (c 0.18,  $\text{CH}_2\text{Cl}_2$ ).

**2-(4-bromophenyl)-3-((2R,3R)-2-(4-(trifluoromethyl)phenyl)-2,3-dihydrobenzofuran-3-yl)-2H-indazole (2g)**

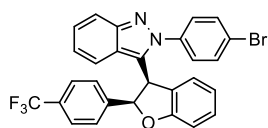

Yield 95%, > 99:1 dr, pale solid, m. p. 180-181 °C,  $R_f = 0.45$  (DCM/petroleum ether = 1/2);  $^1\text{H NMR}$  (400 MHz,  $\text{CDCl}_3$ )  $\delta$  7.66 (d,  $J = 8.1$  Hz, 2H), 7.51 (d,  $J = 8.8$  Hz, 1H), 7.39 (t,  $J = 7.9$  Hz, 1H), 7.25 – 7.18 (m, 3H), 7.17 – 7.11 (m, 2H), 7.10 – 6.98 (m, 3H), 6.95 (d,  $J = 8.0$  Hz, 2H), 6.76 (t,  $J = 7.7$  Hz, 1H), 6.42 (d,  $J = 8.7$  Hz, 1H), 5.82 (d,  $J = 8.7$  Hz, 1H), 5.41 (d,  $J = 8.7$  Hz, 1H);  $^{13}\text{C NMR}$  (101 MHz,  $\text{CDCl}_3$ )  $\delta$  159.9, 148.7, 140.1, 138.4, 132.6, 132.2, 130.5 (q,  $J = 32.3$  Hz), 130.1, 128.2, 126.9, 126.7, 126.1, 124.8 (q,  $J = 4.0$  Hz), 123.7 (q,  $J = 273.2$  Hz), 123.4, 122.3, 122.2, 121.9, 120.3, 117.6, 110.4, 87.1, 45.6;  $^{19}\text{F NMR}$  (376 MHz,  $\text{CDCl}_3$ )  $\delta$  -62.7; IR (KBr,  $\text{cm}^{-1}$ ) 3056, 2963, 2926, 1623, 1597, 1515, 1495, 1478, 1462, 1380, 1324, 1232, 1166, 1125, 1067, 1014, 831, 742; HRMS (ESI) Calcd for  $\text{C}_{28}\text{H}_{19}\text{BrF}_3\text{N}_2\text{O}$  ( $\text{M}+\text{H}$ ) $^+$  535.0627, Found 535.0629; HPLC: INA column, 90:10 hexanes:isopropanol, 1.00 mL/min,  $t_R =$  major: 12.9 min, minor: 15.4 min, > 99:1 er;  $[\alpha]_D^{24}$  39.7° (c 0.35,  $\text{CH}_2\text{Cl}_2$ ).

**4-((2R,3R)-3-(2-(4-bromophenyl)-2H-indazol-3-yl)-2,3-dihydrobenzofuran-2-yl)benzonitrile (2h)**

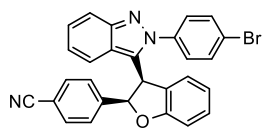

Yield 98%, > 99:1 dr, pale solid, m. p. 184-185 °C,  $R_f = 0.4$  (EtOAc/petroleum ether = 1/5);  $^1\text{H NMR}$  (400 MHz,  $\text{CDCl}_3$ )  $\delta$  7.71 (d,  $J = 8.2$  Hz, 2H), 7.50 (d,  $J = 8.8$  Hz, 1H), 7.39 (t,  $J = 7.8$  Hz, 1H), 7.27 (d,  $J = 7.8$  Hz, 2H), 7.21 – 7.12 (m, 5H), 7.04 – 6.95 (m, 3H), 6.76 (t,  $J = 7.7$  Hz, 1H), 6.46 (d,  $J = 8.7$  Hz, 1H), 5.84 (d,  $J = 8.9$  Hz, 1H), 5.46 (d,  $J = 8.9$  Hz, 1H);  $^{13}\text{C NMR}$  (101 MHz,  $\text{CDCl}_3$ )  $\delta$  159.6, 148.7, 141.7, 138.3, 132.7, 132.0, 131.5, 130.2, 128.2, 127.0, 126.8, 126.4, 126.0, 123.6, 122.4, 122.2, 121.8, 120.2, 118.2, 117.7, 112.0, 110.4, 86.7, 45.5; IR (KBr,  $\text{cm}^{-1}$ ) 3057, 2963, 2229, 1726, 1612, 1596, 1514, 1478, 1380, 1264, 1232, 1097, 1013, 832, 749; HRMS (ESI) Calcd for  $\text{C}_{28}\text{H}_{19}\text{BrN}_3\text{O}$  ( $\text{M}+\text{H}$ ) $^+$  492.0706, Found 492.0706; HPLC: INA column, 90:10 hexanes:isopropanol, 1.00 mL/min,  $t_R =$  major: 45.4 min, minor: 36.8 min, > 99:1 er;  $[\alpha]_D^{24}$  14.4° (c 0.027,  $\text{CH}_2\text{Cl}_2$ ).

**2-(4-bromophenyl)-3-((2R,3R)-2-(3-bromophenyl)-2,3-dihydrobenzofuran-3-yl)-2H-indazole (2i)**

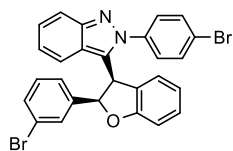

Yield 98%, > 99:1 dr, pale solid, m. p. 170-171 °C,  $R_f = 0.6$  (EtOAc/petroleum ether = 1/10);  $^1\text{H NMR}$  (500 MHz,  $\text{CDCl}_3$ )  $\delta$  7.63 (d,  $J = 7.4$  Hz, 2H), 7.45 (d,  $J = 8.5$  Hz, 1H), 7.35 – 7.28 (m, 1H), 7.19 – 7.08 (m, 3H), 7.07 – 7.00 (m, 3H), 6.98 – 6.93 (m, 1H), 6.88 (s, 1H), 6.79 – 6.63 (m, 3H), 6.41 (d,  $J = 8.2$  Hz, 1H), 5.66 (d,  $J = 8.4$  Hz, 1H), 5.27 (d,  $J = 8.5$  Hz, 1H);  $^{13}\text{C NMR}$  (126 MHz,  $\text{CDCl}_3$ )  $\delta$  159.9, 148.6, 138.4, 138.3, 132.6, 131.3, 130.1, 129.7, 129.5, 128.5, 126.7, 126.6, 126.1, 124.8, 123.4, 122.2, 122.1, 121.94, 121.89, 120.3, 117.6, 110.4, 87.0, 45.5; IR (KBr,  $\text{cm}^{-1}$ ) 3054, 1595, 1494, 1477, 1275, 1262, 1233, 1114, 1070, 833, 749; HRMS (ESI) Calcd for  $\text{C}_{27}\text{H}_{19}\text{Br}_2\text{N}_2\text{O}$  ( $\text{M}+\text{H}$ ) $^+$  544.9859, Found 544.9855; HPLC: INA column, 90:10 hexanes:isopropanol, 1.00 mL/min,  $t_R =$  major: 18.4 min, minor: 22.3 min, 98:2 er;  $[\alpha]_D^{24}$  91.2° (c 0.38,  $\text{CH}_2\text{Cl}_2$ ).

**2-(4-bromophenyl)-3-((2R,3R)-2-(2-bromophenyl)-2,3-dihydrobenzofuran-3-yl)-2H-indazole (2j)**

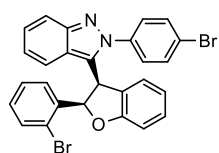

Yield 96%, 97:3 dr, pale solid, m. p. 188-189 °C,  $R_f = 0.6$  (EtOAc/petroleum ether = 1/10);  $^1\text{H NMR}$  (400 MHz,  $\text{CDCl}_3$ )  $\delta$  7.64 (d,  $J = 8.2$  Hz, 2H), 7.50 (d,  $J = 8.7$  Hz, 1H), 7.39 (t,  $J = 7.8$  Hz, 1H), 7.34 – 7.26 (m, 2H), 7.17 – 7.10 (m, 2H), 7.10 – 6.93 (m, 5H), 6.87 – 6.75 (m, 2H), 6.50 (d,  $J = 8.7$  Hz, 1H), 6.12 (d,  $J = 8.0$  Hz, 1H), 5.50 (d,  $J = 8.0$  Hz, 1H);  $^{13}\text{C NMR}$  (101 MHz,  $\text{CDCl}_3$ )  $\delta$  160.0, 148.6, 138.4, 135.1, 132.6, 132.5, 131.9, 130.0, 129.8, 128.52, 128.45, 127.4, 127.0, 126.5, 126.1, 123.2, 122.5, 122.3, 122.2, 122.0, 120.5, 117.6, 110.5, 87.3, 43.8; IR (KBr,  $\text{cm}^{-1}$ ) 2924, 1597, 1494, 1476, 1275, 1261, 1069, 1012, 749; HRMS (ESI) Calcd for  $\text{C}_{27}\text{H}_{19}\text{Br}_2\text{N}_2\text{O}$  ( $\text{M}+\text{H}$ ) $^+$  544.9859, Found 544.9857; HPLC: INA column, 90:10 hexanes:isopropanol, 1.00 mL/min,  $t_R =$  major: 11.9 min, minor: 17.6 min, 95:5 er;  $[\alpha]_D^{24}$  94.7° (c 0.10,  $\text{CH}_2\text{Cl}_2$ ).

**2-(4-bromophenyl)-3-((2R,3R)-2-(2-methoxyphenyl)-2,3-dihydrobenzofuran-3-yl)-2H-indazole (2k)**

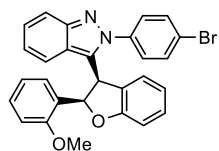

Yield 83%, 98:2 dr, pale solid, m. p. 141-143 °C,  $R_f = 0.5$  (EtOAc/petroleum ether = 1/10);  $^1\text{H NMR}$  (500 MHz,  $\text{CDCl}_3$ )  $\delta$  7.69 (d,  $J = 8.1$  Hz, 2H), 7.51 (d,  $J = 8.8$  Hz, 1H), 7.39 (d,  $J = 8.2$  Hz, 2H), 7.31 (t,  $J = 7.7$  Hz, 1H), 7.16 (dd,  $J = 7.7, 1.7$  Hz, 1H), 7.14 – 7.06 (m, 2H), 7.04 – 6.98 (m, 2H), 6.90 (t,  $J = 7.4$  Hz,

1H), 6.64 (q,  $J = 8.2$  Hz, 2H), 6.44 (d,  $J = 8.2$  Hz, 1H), 6.39 (d,  $J = 8.7$  Hz, 1H), 6.26 (d,  $J = 8.5$  Hz, 1H), 5.47 (d,  $J = 8.6$  Hz, 1H), 3.30 (s, 3H);  $^{13}\text{C}$  NMR (126 MHz,  $\text{CDCl}_3$ )  $\delta$  160.1, 155.6, 148.5, 138.9, 133.0, 132.3, 129.5, 129.1, 127.9, 127.4, 127.1, 126.4, 125.8, 124.9, 122.8, 121.6, 121.4, 121.2, 121.0, 120.3, 117.1, 110.1, 109.4, 83.2, 54.8, 45.0; IR (KBr,  $\text{cm}^{-1}$ ) 3053, 2936, 2837, 1624, 1593, 1515, 1495, 1477, 1276, 1264, 1247, 833, 749; HRMS (ESI) Calcd for  $\text{C}_{28}\text{H}_{22}\text{BrN}_2\text{O}_2$  ( $\text{M}+\text{H}$ ) $^+$  497.0859, Found 497.0860; HPLC: INA column, 90:10 hexanes:isopropanol, 1.00 mL/min,  $t_{\text{R}}$  = major: 16.4 min, minor: 12.9 min, 98:2 er;  $[\alpha]_{\text{D}}^{24} 95.7^\circ$  (c 0.3,  $\text{CH}_2\text{Cl}_2$ ).

**2-(4-bromophenyl)-3-((2R,3R)-2-(naphthalen-1-yl)-2,3-dihydrobenzofuran-3-yl)-2H-indazole (2l)**

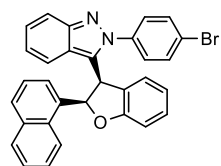

Yield 99%, > 99:1 dr, pale solid, m. p. 184-185 °C,  $R_f = 0.6$  (EtOAc/petroleum ether = 1/10);  $^1\text{H}$  NMR (500 MHz,  $\text{CDCl}_3$ )  $\delta$  7.76 (d,  $J = 8.2$  Hz, 1H), 7.58 (d,  $J = 8.2$  Hz, 1H), 7.46 – 7.39 (m, 3H), 7.31 – 7.26 (m, 2H), 7.23 – 7.10 (m, 6H), 7.05 (t,  $J = 7.5$  Hz, 1H), 6.99 (t,  $J = 7.7$  Hz, 1H), 6.81 (dd,  $J = 8.7, 6.6$  Hz, 1H), 6.55 (d,  $J = 8.3$  Hz, 2H), 6.44 (d,  $J = 8.1$  Hz, 2H), 5.55 (d,  $J = 8.0$  Hz, 1H);  $^{13}\text{C}$  NMR (126 MHz,  $\text{CDCl}_3$ )  $\delta$  160.3, 148.5, 137.9, 133.0, 132.8, 131.9, 130.9, 130.1, 129.9, 128.9, 128.5, 127.8, 127.6, 126.5, 126.4, 126.2, 125.3, 124.9, 124.4, 122.6, 122.2, 122.1, 121.9, 121.3, 120.7, 117.4, 110.7, 85.0, 44.9; IR (KBr,  $\text{cm}^{-1}$ ) 3053, 2924, 1596, 1513, 1494, 1477, 1462, 1379, 1275, 1260, 833; HRMS (ESI) Calcd for  $\text{C}_{31}\text{H}_{22}\text{BrN}_2\text{O}$  ( $\text{M}+\text{H}$ ) $^+$  517.0910, Found 517.0902; HPLC: INA column, 90:10 hexanes:isopropanol, 1.00 mL/min,  $t_{\text{R}}$  = major: 17.0 min, minor: 21.8 min, 99:1 er;  $[\alpha]_{\text{D}}^{24} 167.2^\circ$  (c 0.43,  $\text{CH}_2\text{Cl}_2$ ).

**2-(4-bromophenyl)-3-((2R,3R)-2-(naphthalen-2-yl)-2,3-dihydrobenzofuran-3-yl)-2H-indazole (2m)**

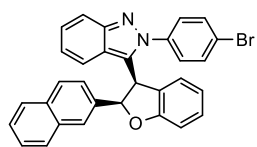

Yield 98%, > 99:1 dr, pale solid, m. p. 204-205 °C,  $R_f = 0.45$  (DCM/petroleum ether = 1/2);  $^1\text{H}$  NMR (500 MHz,  $\text{CDCl}_3$ )  $\delta$  7.62 – 7.56 (m, 1H), 7.47 (d,  $J = 7.2$  Hz, 1H), 7.44 – 7.37 (m, 3H), 7.34 (t,  $J = 8.3$  Hz, 4H), 7.28 (s, 1H), 7.20 – 7.17 (m, 1H), 7.11 – 7.03 (m, 2H), 6.96 (t,  $J = 7.6$  Hz, 1H), 6.76 – 6.63 (m, 4H), 6.42 (d,  $J = 8.6$  Hz, 1H), 5.85 (d,  $J = 8.5$  Hz, 1H), 5.30 (d,  $J = 8.5$  Hz, 1H);  $^{13}\text{C}$  NMR (126 MHz,  $\text{CDCl}_3$ )  $\delta$  160.3, 148.6, 138.4, 133.3, 133.09, 133.06, 132.6, 132.2, 130.0, 128.4, 127.70, 127.67, 127.6, 127.2, 126.6, 126.5, 126.31, 126.28, 126.2, 123.8, 123.2, 122.1, 122.01, 121.98, 120.5, 117.5, 110.4, 88.4, 45.6; IR (KBr,  $\text{cm}^{-1}$ ) 3054, 2965, 2925, 1623, 1596, 1513, 1495, 1477, 1462, 1378, 1232, 1070, 1013, 749; HRMS (ESI) Calcd for  $\text{C}_{31}\text{H}_{22}\text{BrN}_2\text{O}$  ( $\text{M}+\text{H}$ ) $^+$  517.0910, Found 517.0911; HPLC: INA column, 90:10 hexanes:isopropanol, 1.00 mL/min,  $t_{\text{R}}$  = major: 20.5 min, minor: 23.2 min, 98:2 er;  $[\alpha]_{\text{D}}^{24} 54.0^\circ$  (c 0.027,  $\text{CH}_2\text{Cl}_2$ ).

**2-(4-bromophenyl)-3-((2S,3R)-2-vinyl-2,3-dihydrobenzofuran-3-yl)-2H-indazole (2n)**

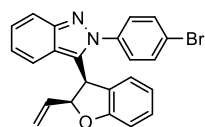

Yield 80%, 97:3 dr, pale solid, m. p. 184-185 °C,  $R_f = 0.5$  (EtOAc/petroleum ether = 1/10);  $^1\text{H}$  NMR (500 MHz,  $\text{CDCl}_3$ )  $\delta$  7.80 – 7.62 (m, 3H), 7.51 – 7.36 (m, 2H), 7.29 – 7.21 (m, 2H), 6.98 (d,  $J = 7.5$  Hz, 2H), 6.87 (t,  $J = 7.4$  Hz, 2H), 6.80 (d,  $J = 8.8$  Hz, 1H), 5.60 (ddd,  $J = 17.7, 10.2, 8.0$  Hz, 1H), 5.37 (d,  $J = 17.0$  Hz, 1H), 5.29 (t,  $J = 8.7$  Hz, 1H), 5.19 – 5.05 (m, 2H);  $^{13}\text{C}$  NMR (126 MHz,  $\text{CDCl}_3$ )  $\delta$  159.4, 149.0, 138.6, 133.8, 133.4, 132.6, 129.7, 128.3, 127.1, 126.9, 125.7, 123.5, 122.1, 121.5, 120.8, 120.4, 117.6, 110.1, 86.8, 44.1; IR (KBr,  $\text{cm}^{-1}$ ) 3059, 2924, 2853, 1596, 1516, 1495, 1478, 1380, 1275, 1262, 1233, 1013,

833; HRMS (ESI) Calcd for  $C_{23}H_{18}BrN_2O$  (M+H)<sup>+</sup> 417.0597, Found 417.0595; HPLC: INA column, 90:10 hexanes:isopropanol, 1.00 mL/min,  $t_R$  = major: 13.8 min, minor: 16.3 min, 97:3 er;  $[\alpha]_D^{24}$  19.4° (c 0.28,  $CH_2Cl_2$ ).

**2-(4-bromophenyl)-3-((2R,3R)-2-(prop-1-yn-1-yl)-2,3-dihydrobenzofuran-3-yl)-2H-indazole (2o)**

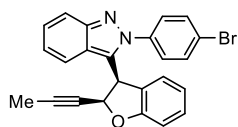

Yield 78%, > 99:1 dr, pale solid, m. p. 169-170 °C,  $R_f$  = 0.6 (EtOAc/petroleum ether = 1/10); <sup>1</sup>H NMR (500 MHz,  $CDCl_3$ )  $\delta$  7.78 – 7.64 (m, 3H), 7.55 – 7.43 (m, 2H), 7.29 – 7.23 (m, 2H), 6.98 (d,  $J$  = 7.7 Hz, 2H), 6.87 (d,  $J$  = 8.5 Hz, 3H), 5.53 (d,  $J$  = 9.0 Hz, 1H), 5.14 (d,  $J$  = 9.2 Hz, 1H), 1.43 (s, 3H); <sup>13</sup>C NMR (126 MHz,  $CDCl_3$ )  $\delta$  158.9, 149.0, 138.8, 133.6, 132.6, 129.7, 128.3, 126.7, 126.0, 125.7, 123.5, 121.8, 121.7, 121.3, 117.4, 110.4, 87.6, 76.4, 74.1, 45.1, 3.4; IR (KBr,  $cm^{-1}$ ) 3058, 2962, 2924, 2857, 2243, 1595, 1487, 1382, 1266, 1227, 1162, 1100, 1018, 750; HRMS (ESI) Calcd for  $C_{24}H_{18}BrN_2O$  (M+H)<sup>+</sup> 429.0597, Found 429.0601; HPLC: INA column, 90:10 hexanes:isopropanol, 1.00 mL/min,  $t_R$  = major: 15.3 min, minor: 16.4 min, 97:3 er;  $[\alpha]_D^{24}$  -51.0° (c 0.17,  $CH_2Cl_2$ ).

**2-(4-bromophenyl)-3-((2R,3R)-2-((trimethylsilyl)ethynyl)-2,3-dihydrobenzofuran-3-yl)-2H-indazole (2p)**

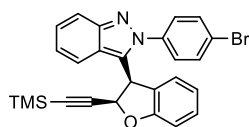

Yield 76%, > 99:1 dr, pale solid, m. p. 160-161 °C,  $R_f$  = 0.6 (EtOAc/petroleum ether = 1/10); <sup>1</sup>H NMR (500 MHz,  $CDCl_3$ )  $\delta$  7.64 – 7.45 (m, 3H), 7.34 (d,  $J$  = 7.7 Hz, 2H), 7.13 – 7.08 (m, 1H), 7.07 – 7.02 (m, 1H), 6.82 (d,  $J$  = 7.3 Hz, 2H), 6.75 – 6.59 (m, 3H), 5.37 (d,  $J$  = 9.6 Hz, 1H), 5.06 – 4.94 (m, 1H), -0.45 (s, 9H); <sup>13</sup>C NMR (126 MHz,  $CDCl_3$ )  $\delta$  159.9, 150.1, 139.9, 134.8, 133.8, 130.9, 129.4, 127.8, 126.9, 126.7, 124.6, 122.92, 122.85, 122.3, 118.6, 111.5, 100.3, 97.7, 77.2, 46.2, 0.0; IR (KBr,  $cm^{-1}$ ) 3060, 2961, 1593, 1488, 1383, 1261, 1078, 1020, 846, 804, 753; HRMS (ESI) Calcd for  $C_{26}H_{24}BrN_2OSi$  (M+H)<sup>+</sup> 487.0836, Found 487.0826; HPLC: INA column, 90:10 hexanes:isopropanol, 1.00 mL/min,  $t_R$  = major: 9.8 min, minor: 11.3 min, 90:10 er;  $[\alpha]_D^{24}$  -14.4° (c 0.014,  $CH_2Cl_2$ ).

**2-(4-bromophenyl)-3-((2S,3R)-2-phenethyl-2,3-dihydrobenzofuran-3-yl)-2H-indazole (2q)**

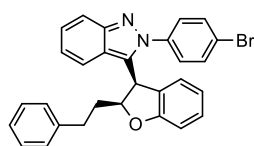

Yield 87%, 96:4 dr, pale solid, m. p. 175-176 °C,  $R_f$  = 0.5 (EtOAc/petroleum ether = 1/20); <sup>1</sup>H NMR (400 MHz,  $CDCl_3$ )  $\delta$  7.68 (d,  $J$  = 8.7 Hz, 1H), 7.63 (d,  $J$  = 8.4 Hz, 2H), 7.37 – 7.25 (m, 3H), 7.24 – 7.13 (m, 4H), 7.04 – 6.95 (m, 4H), 6.94 – 6.81 (m, 3H), 5.00 (d,  $J$  = 9.2 Hz, 1H), 4.79 (td,  $J$  = 9.6, 3.5 Hz, 1H), 2.81 – 2.70 (m, 1H), 2.67 – 2.55 (m, 1H), 1.97 – 1.83 (m, 1H), 1.45 – 1.35 (m, 1H); <sup>13</sup>C NMR (101 MHz,  $CDCl_3$ )  $\delta$  159.4, 149.1, 140.8, 138.6, 133.7, 132.7, 129.5, 128.6, 128.5, 128.1, 127.2, 127.0, 126.2, 125.7, 123.5, 122.2, 121.4, 121.1, 117.7, 110.2, 84.7, 43.4, 33.6, 32.1; IR (KBr,  $cm^{-1}$ ) 3060, 3027, 2951, 1732, 1624, 1597, 1543, 1516, 1495, 1479, 1461, 1264, 1234, 832, 749; HRMS (ESI) Calcd for  $C_{29}H_{24}BrN_2O$  (M+H)<sup>+</sup> 495.1067, Found 495.1064; HPLC: INA column, 90:10 hexanes:isopropanol, 1.00 mL/min,  $t_R$  = major: 10.1 min, minor: 15.6 min, > 99:1 er;  $[\alpha]_D^{24}$  -13.7° (c 0.29,  $CH_2Cl_2$ ).

**2-(4-bromophenyl)-3-((2S,3R)-2-isobutyl-2,3-dihydrobenzofuran-3-yl)-2H-indazole (2r)**

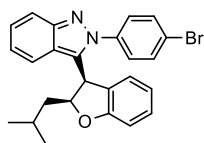

Yield 71%, 93:7 dr, pale solid, m. p. 110-111 °C,  $R_f = 0.6$  (EtOAc/petroleum ether = 1/20);  $^1\text{H NMR}$  (400 MHz,  $\text{CDCl}_3$ )  $\delta$  7.80 – 7.62 (m, 3H), 7.43 (d,  $J = 8.1$  Hz, 2H), 7.21 (d,  $J = 8.2$  Hz, 2H), 6.99 (d,  $J = 7.4$  Hz, 1H), 6.96 – 6.72 (m, 4H), 5.01 (d,  $J = 9.0$  Hz, 1H), 4.93 (td,  $J = 9.5, 9.1, 3.4$  Hz, 1H), 1.78 – 1.68 (m, 1H), 1.58 – 1.46 (m, 1H), 0.98 – 0.87 (m, 1H), 0.86 – 0.71 (m, 6H);  $^{13}\text{C NMR}$  (101 MHz,  $\text{CDCl}_3$ )  $\delta$  159.5, 149.1, 138.7, 134.1, 132.8, 129.5, 128.2, 127.5, 127.0, 125.6, 123.6, 122.1, 121.4, 121.2, 121.1, 117.6, 110.2, 84.5, 43.6, 40.6, 25.2, 23.4, 21.8; IR (KBr,  $\text{cm}^{-1}$ ) 3055, 2956, 2930, 2870, 1625, 1597, 1516, 1495, 1479, 1381, 1275, 1264, 1234, 1069, 749; HRMS (ESI) Calcd for  $\text{C}_{25}\text{H}_{24}\text{BrN}_2\text{O}$  ( $\text{M}+\text{H}$ ) $^+$  447.1067, Found 447.1072; HPLC: INA column, 90:10 hexanes:isopropanol, 1.00 mL/min,  $t_R =$  major: 7.0 min, minor: 9.7 min, > 99:1 er;  $[\alpha]_D^{24} 52.7^\circ$  (c 0.22,  $\text{CH}_2\text{Cl}_2$ ).

**2-(4-bromophenyl)-3-((2S,3R)-2-isopropyl-2,3-dihydrobenzofuran-3-yl)-2H-indazole (2s)**

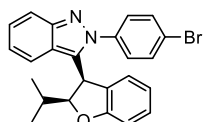

Yield 78%, 98:2 dr, pale solid, m. p. 200-201 °C,  $R_f = 0.6$  (EtOAc/petroleum ether = 1/20);  $^1\text{H NMR}$  (500 MHz,  $\text{CDCl}_3$ )  $\delta$  7.76 (d,  $J = 8.6$  Hz, 2H), 7.65 (d,  $J = 8.8$  Hz, 1H), 7.54 – 7.46 (m, 2H), 7.27 (d,  $J = 8.7$  Hz, 1H), 7.24 – 7.16 (m, 2H), 7.07 (d,  $J = 7.4$  Hz, 1H), 6.98 (d,  $J = 8.1$  Hz, 1H), 6.91 (dd,  $J = 8.7, 6.6$  Hz, 1H), 6.83 (t,  $J = 7.5$  Hz, 1H), 4.92 (d,  $J = 8.1$  Hz, 1H), 4.34 (dd,  $J = 10.4, 8.1$  Hz, 1H), 1.89 – 1.78 (m, 1H), 1.07 (d,  $J = 6.5$  Hz, 3H), 0.48 (d,  $J = 6.6$  Hz, 3H);  $^{13}\text{C NMR}$  (126 MHz,  $\text{CDCl}_3$ )  $\delta$  159.1, 149.1, 138.7, 134.6, 132.8, 129.4, 128.9, 128.6, 126.9, 125.0, 123.6, 122.1, 121.4, 121.2, 120.9, 117.6, 110.4, 92.1, 42.1, 28.8, 20.1, 18.9; IR (KBr,  $\text{cm}^{-1}$ ) 2967, 2870, 1514, 1493, 1275, 1261, 1010, 749; HRMS (ESI) Calcd for  $\text{C}_{24}\text{H}_{22}\text{BrN}_2\text{O}$  ( $\text{M}+\text{H}$ ) $^+$  433.0910, Found 433.0908; HPLC: INA column, 90:10 hexanes:isopropanol, 1.00 mL/min,  $t_R =$  major: 7.9 min, minor: 19.7 min, > 99:1 er;  $[\alpha]_D^{24} 169.0^\circ$  (c 0.26,  $\text{CH}_2\text{Cl}_2$ ).

**2-(4-bromophenyl)-3-((2S,3R)-2-cyclopropyl-2,3-dihydrobenzofuran-3-yl)-2H-indazole (2t)**

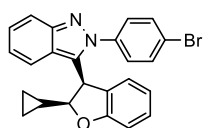

Yield 93%, 98:2 dr, pale solid, m. p. 166-167 °C,  $R_f = 0.6$  (EtOAc/petroleum ether = 1/20);  $^1\text{H NMR}$  (500 MHz,  $\text{CDCl}_3$ )  $\delta$  7.74 (d,  $J = 8.2$  Hz, 2H), 7.67 (d,  $J = 8.8$  Hz, 1H), 7.51 (d,  $J = 8.2$  Hz, 2H), 7.25 – 7.20 (m, 2H), 7.02 (d,  $J = 7.4$  Hz, 1H), 6.96 (dd,  $J = 10.7, 8.3$  Hz, 2H), 6.90 – 6.82 (m, 2H), 5.06 (d,  $J = 8.9$  Hz, 1H), 4.07 (t,  $J = 9.2$  Hz, 1H), 0.81 – 0.71 (m, 1H), 0.58 – 0.45 (m, 2H), 0.24 – 0.18 (m, 1H), 0.04 – -0.03 (m, 1H);  $^{13}\text{C NMR}$  (126 MHz,  $\text{CDCl}_3$ )  $\delta$  159.4, 149.0, 138.7, 134.4, 132.7, 129.6, 128.4, 127.7, 126.9, 125.6, 123.5, 122.1, 121.5, 121.3, 121.0, 117.6, 110.0, 91.4, 43.4, 11.5, 4.2, 2.6; IR (KBr,  $\text{cm}^{-1}$ ) 3055, 3006, 2924, 1596, 1515, 1495, 1478, 1461, 1275, 1263, 1234, 972, 749; HRMS (ESI) Calcd for  $\text{C}_{24}\text{H}_{20}\text{BrN}_2\text{O}$  ( $\text{M}+\text{H}$ ) $^+$  431.0754, Found 431.0750; HPLC: INA column, 90:10 hexanes:isopropanol, 1.00 mL/min,  $t_R =$  major: 11.3 min, minor: 17.0 min, 98:2 er;  $[\alpha]_D^{24} 44.3^\circ$  (c 0.34,  $\text{CH}_2\text{Cl}_2$ ).

**2-(4-bromophenyl)-3-((2S,3R)-2-(2-methoxyethyl)-2,3-dihydrobenzofuran-3-yl)-2H-indazole (2u)**

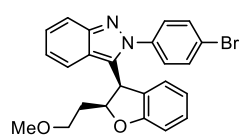

Yield 70%, 93:7 dr, pale solid, m. p. 78-79 °C,  $R_f = 0.4$  (EtOAc/petroleum ether = 1/15);  $^1\text{H NMR}$  (500 MHz,  $\text{CDCl}_3$ )  $\delta$  7.73 (d,  $J = 8.1$  Hz, 2H), 7.68 (d,  $J = 8.8$  Hz, 1H), 7.47 (d,  $J = 8.1$  Hz, 2H), 7.23 (d,  $J = 6.5$  Hz, 2H), 7.00 (d,  $J = 7.4$  Hz, 1H), 6.95 (d,  $J = 8.1$  Hz, 1H), 6.91 – 6.81 (m, 3H), 5.11 – 5.00 (m, 2H), 3.52 (td,  $J = 9.2, 4.9$  Hz, 1H), 3.35 (dt,  $J = 9.9, 5.2$  Hz, 1H), 3.27 (s, 3H), 1.80 – 1.72 (m, 1H), 1.52 – 1.42 (m, 1H);  $^{13}\text{C NMR}$  (126 MHz,  $\text{CDCl}_3$ )  $\delta$  159.3, 149.1, 138.6, 133.8, 132.8, 132.6, 129.5, 128.4, 128.2, 127.3, 126.9, 125.6, 122.2, 121.2, 121.0, 117.7, 110.2, 82.9, 69.0, 58.8, 43.3, 32.4; IR (KBr,  $\text{cm}^{-1}$ ) 2924, 2891, 1624, 1597, 1516, 1495, 1479, 1461, 1381, 1275, 1262, 1115, 1069, 1012, 833; HRMS (ESI) Calcd for  $\text{C}_{24}\text{H}_{22}\text{BrN}_2\text{O}_2$  ( $\text{M}+\text{H}$ ) $^+$  449.0859, Found 449.0854; HPLC: INC column, 90:10 hexanes:isopropanol, 1.00 mL/min,  $t_R =$  major: 6.9 min, minor: 6.6 min, 99:1 er;  $[\alpha]_D^{24}$  13.9° (c 0.24,  $\text{CH}_2\text{Cl}_2$ ).

**2-phenyl-3-((2R,3R)-2-phenyl-2,3-dihydrobenzofuran-3-yl)-2H-indazole (2v)**

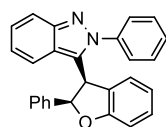

Yield 92%, > 99:1 dr, pale solid, m. p. 150-151 °C,  $R_f = 0.45$  (EtOAc/petroleum ether = 1/10);  $^1\text{H NMR}$  (500 MHz,  $\text{CDCl}_3$ )  $\delta$  7.56 – 7.48 (m, 4H), 7.36 (t,  $J = 7.7$  Hz, 1H), 7.21 – 7.12 (m, 4H), 7.12 – 7.05 (m, 2H), 7.02 – 6.96 (m, 3H), 6.87 (d,  $J = 7.6$  Hz, 2H), 6.76 (d,  $J = 7.4$  Hz, 1H), 6.54 (d,  $J = 8.7$  Hz, 1H), 5.79 (d,  $J = 8.7$  Hz, 1H), 5.36 (d,  $J = 8.7$  Hz, 1H);  $^{13}\text{C NMR}$  (126 MHz,  $\text{CDCl}_3$ )  $\delta$  160.1, 148.4, 139.4, 136.0, 133.0, 129.8, 129.3, 129.2, 128.3, 127.9, 127.4, 127.0, 126.7, 126.3, 126.1, 121.9, 121.8, 121.6, 120.7, 117.4, 110.2, 88.0, 45.6; IR (KBr,  $\text{cm}^{-1}$ ) 3057, 2961, 2927, 1592, 1468, 1411, 1267, 1228, 1267, 1228, 1089, 1022, 749, 695; HRMS (ESI) Calcd for  $\text{C}_{27}\text{H}_{21}\text{N}_2\text{O}$  ( $\text{M}+\text{H}$ ) $^+$  389.1649, Found 389.1649; HPLC: INA column, 90:10 hexanes:isopropanol, 1.00 mL/min,  $t_R =$  major: 15.4 min, minor: 12.0 min, 98:2 er;  $[\alpha]_D^{24}$  96.9° (c 0.15,  $\text{CH}_2\text{Cl}_2$ ).

**2-(4-methoxyphenyl)-3-((2R,3R)-2-phenyl-2,3-dihydrobenzofuran-3-yl)-2H-indazole (2w)**

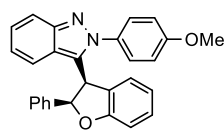

Yield 85%, > 99:1 dr, pale solid, m. p. 162-163 °C,  $R_f = 0.5$  (EtOAc/petroleum ether = 1/5);  $^1\text{H NMR}$  (500 MHz,  $\text{CDCl}_3$ )  $\delta$  7.53 (d,  $J = 8.7$  Hz, 1H), 7.35 (t,  $J = 7.8$  Hz, 1H), 7.19 – 7.13 (m, 2H), 7.10 (d,  $J = 7.8$  Hz, 1H), 7.09 – 7.03 (m, 3H), 7.03 – 6.94 (m, 5H), 6.89 (d,  $J = 7.6$  Hz, 2H), 6.77 (t,  $J = 7.7$  Hz, 1H), 6.54 (d,  $J = 8.7$  Hz, 1H), 5.79 (d,  $J = 8.7$  Hz, 1H), 5.31 (d,  $J = 8.7$  Hz, 1H), 3.90 (s, 3H);  $^{13}\text{C NMR}$  (126 MHz,  $\text{CDCl}_3$ )  $\delta$  160.2, 160.1, 148.1, 136.0, 133.4, 132.1, 129.8, 128.3, 128.2, 127.9, 127.4, 126.7, 126.3, 126.1, 121.8, 121.5, 120.6, 117.3, 114.3, 110.2, 88.0, 55.7, 45.6; IR (KBr,  $\text{cm}^{-1}$ ) 3749, 2963, 1517, 1458, 1377, 1259, 1026, 800, 745, 697; HRMS (ESI) Calcd for  $\text{C}_{28}\text{H}_{23}\text{N}_2\text{O}_2$  ( $\text{M}+\text{H}$ ) $^+$  419.1754, Found 419.1753; HPLC: INA column, 80:20 hexanes:isopropanol, 1.00 mL/min,  $t_R =$  major: 17.0 min, minor: 12.7 min, 96:4 er;  $[\alpha]_D^{24}$  76.9° (c 0.14,  $\text{CH}_2\text{Cl}_2$ ).

**2-(4-bromophenyl)-5-fluoro-3-((2R,3R)-2-phenyl-2,3-dihydrobenzofuran-3-yl)-2H-indazole (2x)**

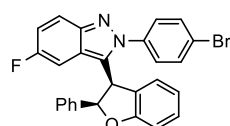

Yield 80%, > 99:1 dr, pale solid, m. p. 171-172 °C,  $R_f = 0.6$  (EtOAc/petroleum ether = 1/10);  $^1\text{H NMR}$  (500 MHz,  $\text{CDCl}_3$ )  $\delta$  7.63 (d,  $J = 8.2$  Hz, 2H), 7.49 (dd,  $J = 9.4, 4.8$  Hz, 1H), 7.39 (t,  $J = 7.8$  Hz, 1H), 7.18 (d,  $J = 7.4$  Hz, 1H), 7.11 (dt,



$J = 7.4, 3.3$  Hz, 2H), 7.02 (t,  $J = 7.3$  Hz, 3H), 7.00 – 6.93 (m, 3H), 6.83 (d,  $J = 7.6$  Hz, 2H), 6.02 (dd,  $J = 9.9, 2.4$  Hz, 1H), 5.76 (d,  $J = 8.5$  Hz, 1H), 5.26 (d,  $J = 8.5$  Hz, 1H);  $^{13}\text{C}$  NMR (126 MHz,  $\text{CDCl}_3$ )  $\delta$  160.1, 157.9 (d,  $J = 240.6$  Hz), 146.0, 138.2, 135.8, 133.3 (d,  $J = 8.7$  Hz), 132.4, 130.2, 128.5, 128.4, 128.0, 126.7, 126.6, 126.0, 123.5, 122.1, 121.3 (d,  $J = 11.4$  Hz), 119.6 (d,  $J = 9.7$  Hz), 118.3 (d,  $J = 29.2$  Hz), 110.5, 103.1 (d,  $J = 25.3$  Hz), 88.0, 45.5;  $^{19}\text{F}$  NMR (471 MHz,  $\text{CDCl}_3$ )  $\delta$  -118.8; IR (KBr,  $\text{cm}^{-1}$ ) 3071, 2928, 1598, 1487, 1487, 1343, 1231, 1176, 1013, 837, 750; HRMS (ESI) Calcd for  $\text{C}_{27}\text{H}_{19}\text{BrFN}_2\text{O}$  ( $\text{M}+\text{H}$ ) $^+$  485.0660, Found 485.0653; HPLC: WHELK column, 90:10 hexanes:isopropanol, 0.80 mL/min,  $t_{\text{R}}$  = major: 18.0 min, minor: 17.0 min, 97:3 er;  $[\alpha]_{\text{D}}^{24}$  61.8 $^\circ$  (c 0.17,  $\text{CH}_2\text{Cl}_2$ ).

**2-(4-bromophenyl)-5-methoxy-3-((2R,3R)-2-phenyl-2,3-dihydrobenzofuran-3-yl)-2H-indazole (2y)**

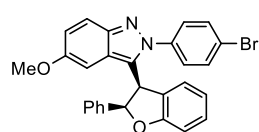

Yield 95%, > 99:1 dr, pale solid, m. p. 134-135  $^\circ\text{C}$ ,  $R_{\text{f}} = 0.4$  (EtOAc/petroleum ether = 1/10);  $^1\text{H}$  NMR (500 MHz,  $\text{CDCl}_3$ )  $\delta$  7.58 (d,  $J = 8.2$  Hz, 2H), 7.42 (d,  $J = 9.3$  Hz, 1H), 7.36 (t,  $J = 7.7$  Hz, 1H), 7.26 – 7.22 (m, 1H), 7.14 (t,  $J = 7.4$  Hz, 1H), 7.10 (d,  $J = 8.1$  Hz, 1H), 7.08 – 6.99 (m, 3H), 6.92 – 6.84 (m, 3H), 6.82 (d,  $J = 7.6$  Hz, 2H), 5.74 (d,  $J = 8.3$  Hz, 1H), 5.55 (s, 1H), 5.24 (d,  $J = 8.3$  Hz, 1H), 3.46 (s, 3H);  $^{13}\text{C}$  NMR (126 MHz,  $\text{CDCl}_3$ )  $\delta$  160.3, 154.7, 145.6, 138.5, 135.8, 132.2, 131.5, 129.8, 128.5, 128.4, 128.0, 127.4, 127.0, 126.5, 123.0, 122.2, 122.0, 121.6, 118.8, 110.0, 96.4, 88.4, 54.9, 45.6; IR (KBr,  $\text{cm}^{-1}$ ) 3748, 3063, 2927, 1523, 1494, 1476, 1459, 1263, 1219, 1178, 1099, 1067, 1014, 833, 810, 699; HRMS (ESI) Calcd for  $\text{C}_{28}\text{H}_{22}\text{BrN}_2\text{O}_2$  ( $\text{M}+\text{H}$ ) $^+$  497.0859, Found 497.0863; HPLC: INA column, 90:10 hexanes:isopropanol, 1.00 mL/min,  $t_{\text{R}}$  = major: 24.2 min, minor: 22.8 min, 97:3 er;  $[\alpha]_{\text{D}}^{24}$  54.7 $^\circ$  (c 0.20,  $\text{CH}_2\text{Cl}_2$ ).

**5-methyl-2-phenyl-3-((2R,3R)-2-phenyl-2,3-dihydrobenzofuran-3-yl)-2H-indazole (2z)**

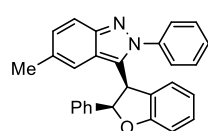

Yield 99%, > 99:1 dr, pale solid, m. p. 145-146  $^\circ\text{C}$ ,  $R_{\text{f}} = 0.6$  (EtOAc/petroleum ether = 1/10);  $^1\text{H}$  NMR (500 MHz,  $\text{CDCl}_3$ )  $\delta$  7.55 – 7.45 (m, 3H), 7.44 (d,  $J = 8.8$  Hz, 1H), 7.37 (t,  $J = 7.6$  Hz, 1H), 7.19 (d,  $J = 7.3$  Hz, 1H), 7.15 – 7.06 (m, 4H), 7.05 – 6.97 (m, 4H), 6.86 (d,  $J = 7.5$  Hz, 2H), 6.18 (s, 1H), 5.76 (d,  $J = 8.6$  Hz, 1H), 5.32 (d,  $J = 8.4$  Hz, 1H), 2.17 (s, 3H);  $^{13}\text{C}$  NMR (126 MHz,  $\text{CDCl}_3$ )  $\delta$  160.1, 147.5, 139.5, 136.1, 131.9, 130.7, 129.7, 129.1, 128.3, 127.8, 127.4, 127.0, 126.8, 126.2, 122.1, 121.8, 118.6, 117.1, 110.1, 88.1, 45.6, 21.9; IR (KBr,  $\text{cm}^{-1}$ ) 3059, 2918, 1227, 1597, 1524, 1499, 1478, 1455, 1232, 802, 754, 696; HRMS (ESI) Calcd for  $\text{C}_{28}\text{H}_{23}\text{N}_2\text{O}$  ( $\text{M}+\text{H}$ ) $^+$  403.1805, Found 403.1801; HPLC: OD-H column, 80:20 hexanes:isopropanol, 1.00 mL/min,  $t_{\text{R}}$  = major: 23.8 min, minor: 7.5 min, 95:5 er;  $[\alpha]_{\text{D}}^{24}$  63.2 $^\circ$  (c 0.15,  $\text{CH}_2\text{Cl}_2$ ).

**2-(4-bromophenyl)-3-((2R,3R)-2-phenyltetrahydrofuran-3-yl)-2H-indazole (2aa)**

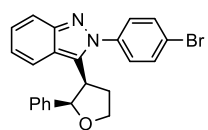

Yield 43%, > 99:1 dr, pale solid, m. p. 115-116  $^\circ\text{C}$ ,  $R_{\text{f}} = 0.6$  (EtOAc/petroleum ether = 1/15);  $^1\text{H}$  NMR (400 MHz,  $\text{CDCl}_3$ )  $\delta$  7.92 (d,  $J = 8.6$  Hz, 1H), 7.75 (d,  $J = 8.8$  Hz, 1H), 7.38 (t,  $J = 7.1$  Hz, 3H), 7.26 – 7.13 (m, 4H), 7.04 (d,  $J = 7.2$  Hz, 2H), 6.58 (d,  $J = 8.2$  Hz, 2H), 5.30 (d,  $J = 9.3$  Hz, 1H), 4.44 – 4.35 (m, 1H), 4.35 – 4.25 (m, 1H), 3.49 – 3.38 (m, 1H), 2.76 – 2.64 (m, 1H), 2.49 – 2.39 (m, 1H);  $^{13}\text{C}$  NMR (126 MHz,  $\text{CDCl}_3$ )  $\delta$  148.7, 138.7, 137.5, 136.6, 132.2, 128.6, 127.8, 127.6, 126.5, 126.3, 123.3, 121.5, 121.2,

120.6, 117.5, 84.5, 67.5, 41.9, 32.0; IR (KBr,  $\text{cm}^{-1}$ ) 3059, 2959, 2865, 1496, 1275, 1260, 1066, 1012, 836; HRMS (ESI) Calcd for  $\text{C}_{23}\text{H}_{20}\text{BrN}_2\text{O}$  ( $\text{M}+\text{H}$ )<sup>+</sup> 419.0754, Found 419.0747; HPLC: INA column, 90:10 hexanes:isopropanol, 1.00 mL/min,  $t_{\text{R}}$  = major: 21.6 min, minor: 9.4 min, 90:10 er;  $[\alpha]_{\text{D}}^{24}$  -10.9° (c 0.15,  $\text{CH}_2\text{Cl}_2$ ).

**(9a*S*,10*S*)-10-(2-(4-bromophenyl)-2*H*-indazol-3-yl)-6,7,8,9*a*,10-hexahydropyrido[1,2-*a*]indole (2ab)**

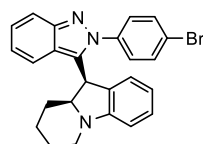

Yield 65%, 84:16 dr, pale solid, m. p. 218-225 °C,  $R_{\text{f}}$  = 0.4 (DCM/petroleum ether = 1/1); <sup>1</sup>H NMR (500 MHz,  $\text{CDCl}_3$ )  $\delta$  7.78 – 7.70 (m, 2H), 7.67 – 7.62 (m, 1H), 7.48 – 7.41 (m, 2H), 7.25 – 7.11 (m, 3H), 6.95 (d,  $J$  = 7.3 Hz, 1H), 6.89 – 6.80 (m, 1H), 6.70 – 6.54 (m, 2H), 4.77 (d,  $J$  = 7.8 Hz, 1H), 3.76 (d,  $J$  = 10.8 Hz, 1H), 3.42 (td,  $J$  = 8.7, 4.2 Hz, 1H), 2.71 (t,  $J$  = 11.5 Hz, 1H), 1.82 – 1.71 (m, 2H), 1.70 – 1.62 (m, 1H), 1.54 – 1.44 (m, 1H), 1.38 – 1.31 (m, 1H), 1.19 – 1.08 (m, 1H); <sup>13</sup>C NMR (126 MHz,  $\text{CDCl}_3$ )  $\delta$  151.5, 149.3, 149.0, 139.0, 132.6, 132.5, 128.8, 128.6, 128.3, 126.8, 125.4, 121.6, 118.3, 117.3, 106.7, 67.8, 45.3, 42.6, 26.8, 24.2, 24.1; IR (KBr,  $\text{cm}^{-1}$ ) 3683, 3305, 3053, 2937, 1654, 1609, 1488, 1361, 1147, 934, 733; HRMS (ESI) Calcd for  $\text{C}_{25}\text{H}_{22}\text{BrN}_3\text{Na}$  ( $\text{M}+\text{Na}$ )<sup>+</sup> 466.0889, Found 466.0887; HPLC: INA column, 90:10 hexanes:isopropanol, 1.00 mL/min,  $t_{\text{R}}$  = major: 27.7 min, minor: 70.0 min, 93:7 er;  $[\alpha]_{\text{D}}^{24}$  98.7° (c 0.24,  $\text{CH}_2\text{Cl}_2$ ).

**2-(4-bromophenyl)-3-((2*R*,3*R*)-2-phenyl-2,3-dihydrobenzo[*b*]thiophen-3-yl)-2*H*-indazole (2ac)**

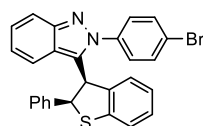

Yield 46%, > 99:1 dr, pale solid, m. p. 150-151 °C,  $R_{\text{f}}$  = 0.5 (EtOAc/petroleum ether = 1/10); <sup>1</sup>H NMR (500 MHz,  $\text{CDCl}_3$ )  $\delta$  7.61 – 7.53 (m, 3H), 7.41 (d,  $J$  = 7.8 Hz, 1H), 7.32 (td,  $J$  = 7.5, 1.5 Hz, 1H), 7.21 – 7.17 (m, 1H), 7.14 – 7.04 (m, 3H), 6.98 (t,  $J$  = 7.8 Hz, 2H), 6.89 – 6.83 (m, 2H), 6.82 – 6.76 (m, 4H), 5.34 (d,  $J$  = 8.1 Hz, 1H), 5.17 (d,  $J$  = 8.1 Hz, 1H); <sup>13</sup>C NMR (126 MHz,  $\text{CDCl}_3$ )  $\delta$  148.7, 142.0, 138.5, 138.1, 136.1, 133.2, 132.3, 129.1, 128.8, 128.5, 128.3, 128.2, 126.5, 126.2, 125.4, 123.4, 122.3, 121.9, 121.8, 121.4, 117.4, 58.2, 51.2; IR (KBr,  $\text{cm}^{-1}$ ) 3059, 2960, 2924, 2856, 1590, 1492, 1452, 1297, 1070, 1018, 800, 742, 700; HRMS (ESI) Calcd for  $\text{C}_{27}\text{H}_{20}\text{BrN}_2\text{S}$  ( $\text{M}+\text{H}$ )<sup>+</sup> 483.0525, Found 483.0514; HPLC: INA column, 90:10 hexanes:isopropanol, 1.00 mL/min,  $t_{\text{R}}$  = major: 17.6 min, minor: 38.2 min, 81:19 er;  $[\alpha]_{\text{D}}^{24}$  27.0° (c 0.11,  $\text{CH}_2\text{Cl}_2$ ).

### 3.5 General procedures for cycloisomerization of azaenyne **3**

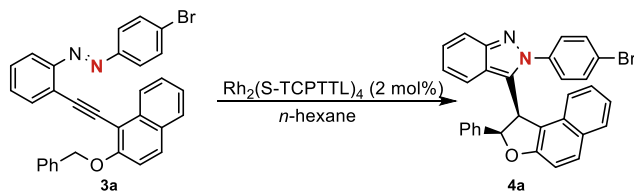

In a Schlenk tube with a magnetic bar under nitrogen atmosphere, **3a** (0.1 mmol, 51.7 mg), *n*-hexane (0.0035 M, 30 ml),  $\text{Rh}_2(\text{S-TCPTTL})_4$  (2 mol%, 3.9 mg) were added. The mixtures were stirred at room temperature until the starting material was consumed (TLC detected). After rapid filtration of silica gel, the solvent was evaporated by rotary evaporator, and the residue was purified by flash column chromatography on silica gel using DCM/petroleum ether as eluent to afford the product **4a** (0.1 mmol,

51.5 mg).

The procedures of other substrates **3**, were similar with that mentioned above.

**2-(4-bromophenyl)-3-((1R,2R)-2-phenyl-1,2-dihydronaphtho[2,1-b]furan-1-yl)-2H-indazole (4a)**

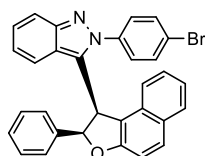

Yield 99%, > 99:1 dr, pale solid, m. p. 190-191 °C,  $R_f = 0.35$  (DCM/petroleum ether = 1/1);  $^1\text{H NMR}$  (500 MHz,  $\text{CDCl}_3$ )  $\delta$  7.87 (d,  $J = 8.8$  Hz, 1H), 7.82 – 7.77 (m, 1H), 7.60 – 7.54 (m, 2H), 7.41 (dd,  $J = 8.7$ , 1.1 Hz, 1H), 7.31 (d,  $J = 8.8$  Hz, 1H), 7.28 – 7.19 (m, 3H), 7.14 – 7.07 (m, 1H), 7.05 – 6.95 (m, 3H), 6.92 – 6.86 (m, 2H), 6.83 (dd,  $J = 8.0$ , 1.4 Hz, 2H), 6.58 (ddd,  $J = 8.7$ , 6.6, 0.9 Hz, 1H), 6.22 (dt,  $J = 8.8$ , 1.1 Hz, 1H), 5.85 (d,  $J = 8.5$  Hz, 1H), 5.48 (d,  $J = 8.6$  Hz, 1H);  $^{13}\text{C NMR}$  (126 MHz,  $\text{CDCl}_3$ )  $\delta$  157.0, 147.6, 137.4, 134.5, 131.5, 131.3, 130.2, 129.6, 128.9, 128.1, 127.8, 127.5, 127.0, 126.5, 125.4, 122.5, 122.4, 121.4, 121.2, 121.0, 119.2, 117.7, 116.4, 111.2, 88.5, 43.8; IR (KBr,  $\text{cm}^{-1}$ ) 3059, 2962, 1627, 1588, 1504, 1495, 1382, 1253, 1072, 1014, 958, 817, 732, 702; HRMS (ESI) Calcd for  $\text{C}_{31}\text{H}_{22}\text{BrN}_2\text{O}$  ( $\text{M}+\text{H}$ ) $^+$  517.0910, Found 517.0902; HPLC: OD-H column, 70:30 hexanes:isopropanol, 0.80 mL/min,  $t_R =$  major: 10.7 min, minor: 16.0 min, 96:4 er;  $[\alpha]_D^{24}$  165.0° (c 0.067,  $\text{CH}_2\text{Cl}_2$ ).

**methyl 4-((1R,2R)-1-(2-(4-bromophenyl)-2H-indazol-3-yl)-1,2-dihydronaphtho[2,1-b]furan-2-yl)-benzoate (4b)**

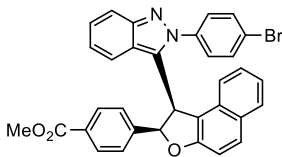

Yield 99%, 96:4 dr, pale solid, m. p. 150-151 °C,  $R_f = 0.5$  (DCM/EtOAc/petroleum ether = 10/1/20);  $^1\text{H NMR}$  (500 MHz,  $\text{CDCl}_3$ )  $\delta$  7.95 (d,  $J = 8.8$  Hz, 1H), 7.88 (d,  $J = 8.1$  Hz, 1H), 7.72 (d,  $J = 8.3$  Hz, 2H), 7.69 (d,  $J = 8.5$  Hz, 2H), 7.46 (s, 1H), 7.39 (d,  $J = 8.8$  Hz, 1H), 7.35 – 7.27 (m, 3H), 7.12 – 7.06 (m, 1H), 7.05 (d,  $J = 8.5$  Hz, 2H), 7.00 (d,  $J = 8.3$  Hz, 2H), 6.67 (dd,  $J = 8.7$ , 6.5 Hz, 1H), 6.32 (d,  $J = 8.7$  Hz, 1H), 5.98 (d,  $J = 8.7$  Hz, 1H), 5.64 (d,  $J = 8.7$  Hz, 1H), 3.86 (s, 3H);  $^{13}\text{C NMR}$  (126 MHz,  $\text{CDCl}_3$ )  $\delta$  166.5, 157.9, 148.6, 140.7, 138.3, 132.6, 132.1, 131.5, 130.6, 130.4, 130.1, 129.2, 128.5, 127.6, 127.3, 126.7, 123.8, 123.6, 122.31, 122.28, 122.2, 120.0, 118.4, 117.6, 112.1, 88.7, 52.2, 44.9; IR (KBr,  $\text{cm}^{-1}$ ) 3059, 2921, 2852, 1721, 1626, 1502, 1431, 1381, 1277, 1107, 1014, 965, 875, 817, 741; HRMS (ESI) Calcd for  $\text{C}_{33}\text{H}_{24}\text{BrN}_2\text{O}_3$  ( $\text{M}+\text{H}$ ) $^+$  575.0965, Found 575.0955; HPLC: OD-H column, 80:20 hexanes:isopropanol, 1.00 mL/min,  $t_R =$  major: 20.8 min, minor: 10.8 min, 96:4 er;  $[\alpha]_D^{24}$  139.9° (c 0.15,  $\text{CH}_2\text{Cl}_2$ ).

**2-(4-bromophenyl)-3-((1R,2R)-2-(naphthalen-2-yl)-1,2-dihydronaphtho[2,1-b]furan-1-yl)-2H-indazole (4c)**

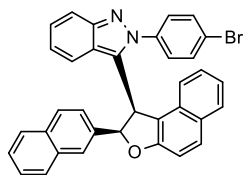

Yield 82%, 92:8 dr, pale solid, m. p. 207-208 °C,  $R_f = 0.4$  (EtOAc/petroleum ether = 1/2);  $^1\text{H NMR}$  (400 MHz,  $\text{CDCl}_3$ )  $\delta$  8.01 (d,  $J = 8.8$  Hz, 1H), 7.93 (d,  $J = 7.7$  Hz, 1H), 7.77 – 7.70 (m, 1H), 7.62 – 7.56 (m, 1H), 7.56 – 7.43 (m, 7H), 7.41 (s, 1H), 7.39 – 7.31 (m, 3H), 7.12 (t,  $J = 7.7$  Hz, 1H), 6.91 (d,  $J = 8.5$  Hz, 1H), 6.82 – 6.64 (m, 3H), 6.32 (d,  $J = 8.7$  Hz, 1H), 6.10 (d,  $J = 8.6$  Hz, 1H), 5.68 (d,  $J = 8.6$  Hz, 1H);  $^{13}\text{C NMR}$  (101 MHz,  $\text{CDCl}_3$ )  $\delta$  158.2, 148.6, 138.4, 133.3, 133.1, 132.7, 132.4, 132.2, 131.3, 130.7, 130.0, 129.2, 128.4, 127.8, 127.6, 127.3, 126.50, 126.46, 126.41, 124.2, 123.7, 123.2, 122.5, 122.3, 122.2, 120.2, 118.6, 117.5, 112.3, 89.7, 44.9; IR (KBr,  $\text{cm}^{-1}$ ) 3057, 2928,

1628, 1591, 1501, 1379, 1251, 1070, 1015, 949, 808, 740; HRMS (ESI) Calcd for  $C_{35}H_{23}BrN_2NaO$  ( $M+Na$ )<sup>+</sup> 589.0886, Found 589.0880; HPLC: INA column, 90:10 hexanes:isopropanol, 1.00 mL/min,  $t_R$  = major: 27.4 min, minor: 37.4 min, 95:5 er;  $[\alpha]_D^{24}$  128.3° (c 0.095,  $CH_2Cl_2$ ).

**2-(4-chlorophenyl)-3-((1R,2R)-2-(3,5-dibromophenyl)-1,2-dihydronaphtho[2,1-b]furan-1-yl)-2H-indazole (4d)**

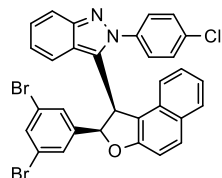

Yield 99%, 95:5 dr, pale solid, m. p. 95-96 °C,  $R_f$  = 0.5 (DCM/petroleum ether = 1/1); <sup>1</sup>H NMR (500 MHz,  $CDCl_3$ )  $\delta$  7.97 (d,  $J$  = 8.9 Hz, 1H), 7.90 (d,  $J$  = 8.1 Hz, 1H), 7.63 (d,  $J$  = 8.3 Hz, 2H), 7.51 (d,  $J$  = 8.7 Hz, 1H), 7.42 – 7.35 (m, 4H), 7.34 – 7.26 (m, 3H), 7.14 – 7.07 (m, 1H), 6.91 (d,  $J$  = 1.7 Hz, 2H), 6.70 (dd,  $J$  = 8.7, 6.6 Hz, 1H), 6.24 (d,  $J$  = 8.7 Hz, 1H), 5.83 (d,  $J$  = 9.0 Hz, 1H), 5.70 (d,  $J$  = 9.0 Hz, 1H); <sup>13</sup>C NMR (101 MHz,  $CDCl_3$ )  $\delta$  157.7, 148.7, 139.8, 137.8, 135.5, 133.9, 131.6, 131.5, 130.6, 130.1, 129.8, 129.3, 128.7, 128.2, 127.7, 126.7, 123.9, 122.6, 122.5, 122.4, 122.2, 119.6, 117.7, 117.6, 112.1, 87.4, 45.1; IR (KBr,  $cm^{-1}$ ) 3019, 2954, 2911, 1733, 1607, 1509, 1452, 1372, 1033, 818, 742, 584; HRMS (ESI) Calcd for  $C_{31}H_{20}Br_2ClN_2O$  ( $M+H$ )<sup>+</sup> 628.9626, Found 628.9631; HPLC: OD-H column, 90:10 hexanes:isopropanol, 1.00 mL/min,  $t_R$  = major: 14.9 min, minor: 10.4 min, 99:1 er;  $[\alpha]_D^{24}$  156.9° (c 0.13,  $CH_2Cl_2$ ).

**2-(4-bromophenyl)-3-((1R,2R)-2-(3,5-difluorophenyl)-1,2-dihydronaphtho[2,1-b]furan-1-yl)-2H-indazole (4e)**

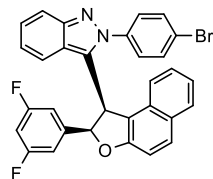

Yield 95%, 95:5 dr, pale solid, m. p. 186-187 °C,  $R_f$  = 0.4 (DCM/petroleum ether = 1/2); <sup>1</sup>H NMR (500 MHz,  $CDCl_3$ )  $\delta$  7.96 (dd,  $J$  = 8.8, 3.0 Hz, 1H), 7.91 – 7.86 (m, 1H), 7.76 (dd,  $J$  = 8.6, 3.0 Hz, 2H), 7.48 (d,  $J$  = 8.9 Hz, 1H), 7.39 (dd,  $J$  = 8.8, 3.0 Hz, 1H), 7.36 – 7.29 (m, 3H), 7.25 – 7.21 (m, 2H), 7.13 – 7.04 (m, 1H), 6.69 – 6.62 (m, 1H), 6.60 – 6.53 (m, 1H), 6.43 (d,  $J$  = 7.1 Hz, 2H), 6.32 – 6.22 (m, 1H), 5.90 (dd,  $J$  = 8.9, 3.0 Hz, 1H), 5.71 (dd,  $J$  = 9.0, 3.0 Hz, 1H); <sup>13</sup>C NMR (126 MHz,  $CDCl_3$ )  $\delta$  162.4 (dd,  $J$  = 250.0, 12.5 Hz), 157.7, 148.73, 139.8 (t,  $J$  = 9.0 Hz), 138.4, 132.7, 131.6, 131.5, 130.6, 130.1, 129.3, 128.4, 127.7, 126.7, 123.8, 123.6, 122.4, 122.3, 122.2, 119.8, 117.9, 117.6, 112.0, 109.9 (dd,  $J$  = 20.2, 6.2 Hz), 103.8 (t,  $J$  = 25.2 Hz), 87.6, 44.9; <sup>19</sup>F NMR (471 MHz,  $CDCl_3$ )  $\delta$  -109.2; IR (KBr,  $cm^{-1}$ ) 3064, 2935, 1626, 1588, 1501, 1381, 1278, 1174, 1137, 1013, 817, 744, 710; HRMS (ESI) Calcd for  $C_{31}H_{20}BrF_2N_2O$  ( $M+H$ )<sup>+</sup> 553.0722, Found 553.0713; HPLC: INA column, 90:10 hexanes:isopropanol, 1.00 mL/min,  $t_R$  = major: 21.5 min, minor: 31.7 min, 96:4 er;  $[\alpha]_D^{24}$  112.4° (c 0.13,  $CH_2Cl_2$ ).

**2-(4-bromophenyl)-3-((1R,2R)-2-(3,5-dichlorophenyl)-1,2-dihydronaphtho[2,1-b]furan-1-yl)-2H-indazole (4f)**

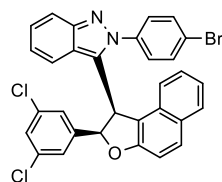

Yield 99%, 96:4 dr, pale solid, m. p. 166-167 °C,  $R_f$  = 0.4 (DCM/petroleum ether = 1/2); <sup>1</sup>H NMR (500 MHz,  $CDCl_3$ )  $\delta$  7.96 (d,  $J$  = 8.8 Hz, 1H), 7.89 (d,  $J$  = 8.0 Hz, 1H), 7.77 (d,  $J$  = 8.1 Hz, 2H), 7.49 (d,  $J$  = 8.8 Hz, 1H), 7.40 – 7.30 (m, 4H), 7.21 (d,  $J$  = 8.1 Hz, 2H), 7.08 (t,  $J$  = 7.7 Hz, 2H), 6.72 (s, 2H), 6.68 (t,  $J$  = 8.7, 6.6 Hz, 1H), 6.24 (d,  $J$  = 8.7 Hz, 1H), 5.85 (d,  $J$  = 9.0 Hz, 1H), 5.71 (d,  $J$  = 9.0 Hz, 1H); <sup>13</sup>C NMR (101 MHz,  $CDCl_3$ )  $\delta$  157.7, 148.7, 139.3, 138.4, 134.5, 132.7, 131.6, 131.4, 130.6, 130.1, 129.3, 128.4, 128.4, 127.7, 126.7, 125.4, 123.9, 123.5, 122.5, 122.5, 122.2, 119.7, 117.6, 112.1, 87.5, 45.0; IR (KBr,  $cm^{-1}$ ) 3741, 3196, 3063, 2962, 1634, 1570, 1425, 1382, 1247, 1068, 1004,

804, 742; HRMS (ESI) Calcd for  $C_{31}H_{19}BrCl_2N_2NaO$  ( $M+Na$ )<sup>+</sup> 606.9950, Found 606.9956; HPLC: INA column, 90:10 hexanes:isopropanol, 1.00 mL/min,  $t_R$  = major:17.9 min, minor: 30.3 min, 98:2 er;  $[\alpha]_D^{24}$  200.8° (c 0.13,  $CH_2Cl_2$ ).

**dimethyl 5-((1*R*,2*R*)-1-(2-(4-bromophenyl)-2*H*-indazol-3-yl)-1,2-dihydronaphtho[2,1-*b*]furan-2-yl)-isophthalate (4*g*)**

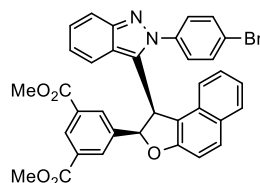

Yield 99%, 95:5 dr, pale solid, m. p. 271-272 °C,  $R_f$  = 0.5 (DCM/EtOAc/petroleum ether = 40/1/40);  $^1H$  NMR (500 MHz,  $CDCl_3$ )  $\delta$  8.43 (s, 1H), 7.97 (d,  $J$  = 8.8 Hz, 1H), 7.89 (d,  $J$  = 7.8 Hz, 1H), 7.75 (s, 2H), 7.68 (d,  $J$  = 8.3 Hz, 2H), 7.44 – 7.38 (m, 2H), 7.37 – 7.31 (m, 3H), 7.11 – 7.05 (m, 3H), 6.72 – 6.65 (m, 1H), 6.34 (d,  $J$  = 8.7 Hz, 1H), 6.04 (d,  $J$  = 9.0 Hz, 1H), 5.74 (d,  $J$  = 9.0 Hz, 1H), 3.82 (s, 6H);  $^{13}C$  NMR (126 MHz,  $CDCl_3$ )  $\delta$  165.4, 157.8, 148.7, 138.2, 137.1, 132.6, 132.2, 131.5, 130.8, 130.6, 130.3, 130.1, 129.2, 128.3, 127.7, 126.5, 123.8, 123.6, 122.4, 122.3, 122.2, 120.0, 117.8, 117.5, 112.2, 87.8, 52.3, 45.0; IR (KBr,  $cm^{-1}$ ) 2962, 1722, 1629, 1498, 1254, 1206, 1095, 1021, 802; HRMS (ESI) Calcd for  $C_{35}H_{25}BrN_2NaO_5$  ( $M+Na$ )<sup>+</sup> 655.0839, Found 655.0844; HPLC: INA column, 80:20 hexanes:isopropanol, 1.00 mL/min,  $t_R$  = major: 20.9 min, minor: 30.9 min, 98:2 er;  $[\alpha]_D^{24}$  247.4° (c 0.13,  $CH_2Cl_2$ ).

**2-(4-bromophenyl)-3-((1*R*,2*R*)-2-(3,5-dimethoxyphenyl)-1,2-dihydronaphtho[2,1-*b*]furan-1-yl)-2*H*-indazole (4*h*)**

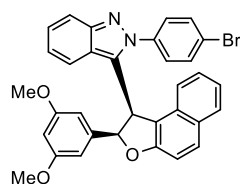

Yield 54%, > 99:1 dr, pale solid, m. p. 90-91 °C,  $R_f$  = 0.4 (DCMEtOAc/petroleum ether = 10/1/20);  $^1H$  NMR (500 MHz,  $CDCl_3$ )  $\delta$  7.88 (d,  $J$  = 8.8 Hz, 1H), 7.81 (d,  $J$  = 8.0 Hz, 1H), 7.58 (d,  $J$  = 8.2 Hz, 2H), 7.44 (d,  $J$  = 8.8 Hz, 1H), 7.32 (d,  $J$  = 8.8 Hz, 1H), 7.29 – 7.22 (m, 3H), 7.01 (d,  $J$  = 7.6 Hz, 1H), 6.96 (d,  $J$  = 8.2 Hz, 2H), 6.59 (t,  $J$  = 7.6 Hz, 1H), 6.25 (d,  $J$  = 8.7 Hz, 1H), 6.19 (s, 1H), 6.00 – 5.91 (m, 2H), 5.75 (d,  $J$  = 8.5 Hz, 1H), 5.44 (d,  $J$  = 8.4 Hz, 1H), 3.27 (s, 6H);  $^{13}C$  NMR (126 MHz,  $CDCl_3$ )  $\delta$  159.3, 157.0, 147.6, 137.3, 136.4, 131.2, 130.3, 129.6, 128.9, 128.1, 127.6, 126.5, 125.3, 122.6, 122.4, 121.6, 121.2, 121.1, 119.1, 117.6, 116.7, 111.2, 104.0, 100.8, 88.5, 53.9, 43.8; IR (KBr,  $cm^{-1}$ ) 2920, 2854, 1735, 1634, 1557, 1376, 1258, 1092, 1020, 800, 694; HRMS (ESI) Calcd for  $C_{33}H_{25}BrN_2NaO_3$  ( $M+Na$ )<sup>+</sup> 599.0941, Found 599.0942; HPLC: INC column, 95:5 hexanes:isopropanol, 1.00 mL/min,  $t_R$  = major: 19.5 min, minor: 18.0 min, 96:4 er;  $[\alpha]_D^{24}$  289.6° (c 0.063,  $CH_2Cl_2$ ).

### 3.6 Procedures for central-to-axial chirality transfer reaction of **2m**

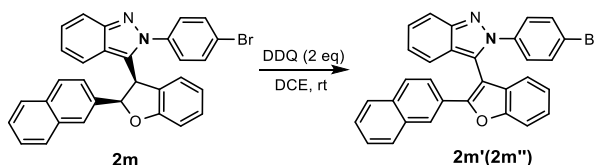

In a Schlenk tube with a magnetic bar under nitrogen atmosphere, **2m** (0.1 mmol, 51.7 mg), DCE (0.05 M, 2 ml), DDQ (2 eq, 45 mg) were added. The mixtures were stirred at room temperature until the starting material was consumed (TLC detected). After rapid filtration of silica gel, the solvent was evaporated by rotary evaporator, and the residue was purified by flash column chromatography on

silica gel using EtOAc/petroleum ether as eluent to afford the product (0.099 mmol, 51.0 mg).

### 2-(4-bromophenyl)-3-(2-(naphthalen-2-yl)benzofuran-3-yl)-2H-indazole (2*m'* and 2*m''*)

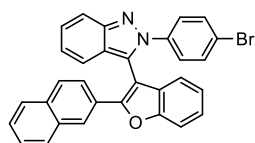

Yield 99%, pale solid, m. p. 226-227 °C,  $R_f = 0.6$  (EtOAc/petroleum ether = 1/40);  $^1\text{H NMR}$  (500 MHz,  $\text{CDCl}_3$ )  $\delta$  7.92 – 7.86 (m, 2H), 7.75 (d,  $J = 7.3$  Hz, 1H), 7.70 (d,  $J = 8.6$  Hz, 1H), 7.67 – 7.61 (m, 2H), 7.51 – 7.44 (m, 3H), 7.44 – 7.37 (m, 2H), 7.31 – 7.27 (m, 2H), 7.23 (d,  $J = 7.5$  Hz, 1H), 7.21 – 7.13 (m, 4H), 7.12 – 7.08 (m, 1H);  $^{13}\text{C NMR}$  (126 MHz,  $\text{CDCl}_3$ )  $\delta$  153.3, 152.5, 148.6, 137.9, 132.2, 132.0, 130.8, 128.2, 127.5, 127.4, 126.6, 126.5, 126.0, 125.9, 125.8, 125.7, 125.3, 125.1, 124.4, 122.7, 122.4, 122.1, 121.8, 121.0, 119.7, 119.1, 117.1, 110.6, 104.8; IR (KBr,  $\text{cm}^{-1}$ ) 3058, 2922, 2857, 1730, 1495, 1458, 1364, 1265, 1084, 1017, 907, 818, 738; HRMS (ESI) Calcd for  $\text{C}_{31}\text{H}_{20}\text{BrN}_2\text{O}$  ( $\text{M}+\text{H}$ ) $^+$  515.0754, Found 515.0759; HPLC: INA column, 90:10 hexanes:isopropanol, 1.00 mL/min,  $t_R$  = isomer1: 7.7min, isomer2: 10.5 min.

### 3.7 General procedures for central-to-axial chirality transfer reactions of 4

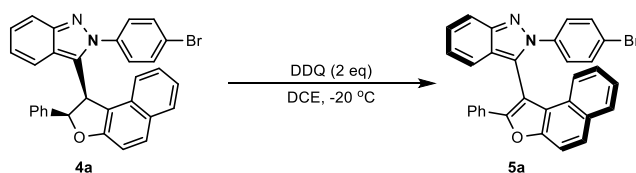

In a Schlenk tube with a magnetic bar under nitrogen atmosphere, **4a** (0.1 mmol, 51.7 mg), DCE (0.05 M, 2 ml), DDQ (2 eq, 45 mg) were added. The mixtures were stirred at -20 °C until the starting material was consumed (TLC detected). After rapid filtration of silica gel, the solvent was evaporated by rotary evaporator, and the residue was purified by flash column chromatography on silica gel using DCM/petroleum ether as eluent to afford the product **5a** (0.099 mmol, 51.0 mg).

The procedures of other substrates **4**, were similar with that mentioned above.

### 2-(4-bromophenyl)-3-(2-phenylnaphtho[2,1-b]furan-1-yl)-2H-indazole (5a)

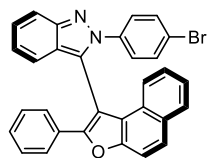

Yield 99%, pale solid, m. p. 170-171 °C,  $R_f = 0.7$  (DCM/petroleum ether = 1/2);  $^1\text{H NMR}$  (500 MHz,  $\text{CDCl}_3$ )  $\delta$  7.94 (d,  $J = 8.4$  Hz, 2H), 7.82 (d,  $J = 9.0$  Hz, 1H), 7.76 (d,  $J = 9.0$  Hz, 1H), 7.49 – 7.38 (m, 3H), 7.30 (d,  $J = 8.2$  Hz, 1H), 7.28 – 7.24 (m, 3H), 7.23 – 7.15 (m, 7H), 7.14 – 7.07 (m, 1H);  $^{13}\text{C NMR}$  (126 MHz,  $\text{CDCl}_3$ )  $\delta$  153.2, 152.1, 149.6, 138.8, 131.8, 131.1, 129.6, 129.1, 128.9, 128.8, 128.0, 127.7, 127.6, 127.0, 126.8, 126.1, 125.8, 124.9, 123.6, 123.4, 123.2, 122.5, 122.1, 120.7, 118.2, 112.3, 106.2; IR (KBr,  $\text{cm}^{-1}$ ) 3058, 2962, 2861, 1589, 1493, 1404, 1261, 1082, 1015, 802, 744, 703; HRMS (ESI) Calcd for  $\text{C}_{31}\text{H}_{19}\text{BrN}_2\text{NaO}$  ( $\text{M}+\text{Na}$ ) $^+$  537.0573, Found 537.0567; HPLC: INA column, 95:5 hexanes:isopropanol, 1.00 mL/min,  $t_R$  = major: 10.0 min, minor: 7.6 min, 91:9 er;  $[\alpha]_D^{24} -5.8^\circ$  (c 0.069,  $\text{CH}_2\text{Cl}_2$ ).

**methyl 4-(1-(2-(4-bromophenyl)-2H-indazol-3-yl)naphtho[2,1-b]furan-2-yl)benzoate (5b)**

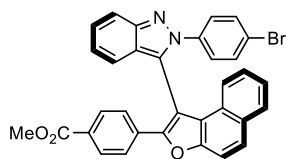

Yield 91%, pale solid, m. p. 224-225 °C,  $R_f = 0.6$  (DCM/petroleum ether = 1/2);  $^1\text{H NMR}$  (500 MHz,  $\text{CDCl}_3$ )  $\delta$  7.96 (d,  $J = 8.2$  Hz, 2H), 7.88 (t,  $J = 9.3$  Hz, 3H), 7.77 (dd,  $J = 9.0, 1.7$  Hz, 1H), 7.49 – 7.41 (m, 3H), 7.33 – 7.25 (m, 5H), 7.22 (s, 1H), 7.18 (s, 2H), 7.11 (t,  $J = 7.5$  Hz, 1H), 3.89 (s, 3H);  $^{13}\text{C NMR}$  (126 MHz,  $\text{CDCl}_3$ )  $\delta$  166.4, 152.5, 151.8, 149.7, 138.7, 133.5, 132.0, 131.1, 130.0, 129.9, 129.2, 127.8, 127.7, 127.6, 127.31, 127.26, 126.0, 125.4, 125.2, 123.5, 123.3, 122.4, 122.3, 120.4, 118.3, 112.3, 108.2, 52.2; IR (KBr,  $\text{cm}^{-1}$ ) 3058, 2957, 1721, 1604, 1494, 1437, 1274, 1188, 1104, 1014, 804, 746; HRMS (ESI) Calcd for  $\text{C}_{33}\text{H}_{21}\text{BrN}_2\text{NaO}_3$  ( $\text{M}+\text{Na}$ ) $^+$  595.0628, Found 595.0621; HPLC: INC column, 95:5 hexanes:isopropanol, 1.00 mL/min,  $t_R =$  major: 10.3 min, minor: 11.0 min, 91:9 er;  $[\alpha]_D^{24} -17.8^\circ$  (c 0.16,  $\text{CH}_2\text{Cl}_2$ ).

**2-(4-bromophenyl)-3-(2-(naphthalen-2-yl)naphtho[2,1-b]furan-1-yl)-2H-indazole (5c)**

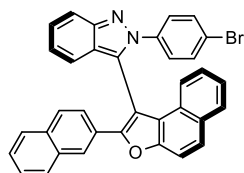

Yield 91%, , pale solid, m. p. 180-181 °C,  $R_f = 0.5$  (EtOAc/petroleum ether = 1/10);  $^1\text{H NMR}$  (500 MHz,  $\text{CDCl}_3$ )  $\delta$  8.00 – 7.92 (m, 2H), 7.84 (d,  $J = 8.7$  Hz, 2H), 7.79 (d,  $J = 9.0$  Hz, 1H), 7.76 – 7.70 (m, 1H), 7.68 – 7.61 (m, 2H), 7.52 – 7.39 (m, 5H), 7.33 (d,  $J = 8.4$  Hz, 1H), 7.27 (d,  $J = 7.6$  Hz, 1H), 7.24 – 7.17 (m, 3H), 7.16 – 7.05 (m, 3H);  $^{13}\text{C NMR}$  (126 MHz,  $\text{CDCl}_3$ )  $\delta$  153.3, 152.2, 149.7, 138.9, 133.12, 133.07, 131.9, 131.1, 129.1, 128.6, 128.5, 128.0, 127.73, 127.65, 127.6, 127.03, 126.95, 126.9, 126.7, 126.1, 125.6, 125.0, 123.7, 123.6, 123.3, 122.7, 122.5, 122.2, 120.7, 118.2, 112.3, 106.6; IR (KBr,  $\text{cm}^{-1}$ ) 3056, 2935, 1615, 1496, 1405, 1365, 1264, 1084, 1011, 947, 809, 742; HRMS (ESI) Calcd for  $\text{C}_{35}\text{H}_{21}\text{BrN}_2\text{NaO}$  ( $\text{M}+\text{Na}$ ) $^+$  587.0729, Found 587.0730; HPLC: INA column, 90:10 hexanes:isopropanol, 1.00 mL/min,  $t_R =$  major: 8.6 min, minor: 7.5 min, 90:10 er;  $[\alpha]_D^{24} -101.9^\circ$  (c 0.074,  $\text{CH}_2\text{Cl}_2$ ).

**2-(4-chlorophenyl)-3-(2-(3,5-dibromophenyl)naphtho[2,1-b]furan-1-yl)-2H-indazole (5d)**

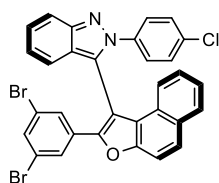

Yield 90%, pale solid, m. p. 201-202 °C,  $R_f = 0.6$  (DCM/petroleum ether = 1/4);  $^1\text{H NMR}$  (500 MHz,  $\text{CDCl}_3$ )  $\delta$  7.97 (t,  $J = 7.6$  Hz, 2H), 7.89 (d,  $J = 9.0$  Hz, 1H), 7.76 (d,  $J = 8.9$  Hz, 1H), 7.52 – 7.38 (m, 5H), 7.33 – 7.26 (m, 3H), 7.21 (s, 2H), 7.16 – 7.09 (m, 3H);  $^{13}\text{C NMR}$  (126 MHz,  $\text{CDCl}_3$ )  $\delta$  151.4, 148.7, 148.5, 137.1, 133.3, 132.8, 131.6, 130.1, 128.2, 128.1, 126.9, 126.8, 126.6, 126.4, 126.1, 125.5, 124.7, 124.3, 122.6, 122.4, 122.3, 122.1, 121.5, 119.2, 117.4, 111.2, 107.5; IR (KBr,  $\text{cm}^{-1}$ ) 3747, 3525, 3446, 2962, 2922, 2851, 1670, 1520, 1340, 1260, 1123, 1014, 944, 803, 746; HRMS (ESI) Calcd for  $\text{C}_{31}\text{H}_{17}\text{Br}_2\text{ClN}_2\text{NaO}$  ( $\text{M}+\text{Na}$ ) $^+$  648.9288, Found 648.9283; HPLC: INA column, 90:10 hexanes:isopropanol, 1.00 mL/min,  $t_R =$  major: 6.7 min, minor: 4.8 min, 91:9 er;  $[\alpha]_D^{24} -57.3^\circ$  (c 0.068,  $\text{CH}_2\text{Cl}_2$ ).

**2-(4-bromophenyl)-3-(2-(3,5-difluorophenyl)naphtho[2,1-b]furan-1-yl)-2H-indazole (5e)**

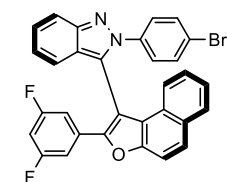

Yield 95%, pale solid, m. p. 184-185 °C,  $R_f = 0.6$  (DCM/petroleum ether = 1/4);  $^1\text{H NMR}$  (500 MHz,  $\text{CDCl}_3$ )  $\delta$  8.03 – 7.91 (m, 3H), 7.81 (d,  $J = 9.0$  Hz, 1H), 7.68 (s, 1H), 7.52 (d,  $J = 6.3$  Hz, 3H), 7.50 – 7.44 (m, 2H), 7.41 (d,  $J = 8.5$  Hz,

1H), 7.33 (t,  $J = 7.4$  Hz, 1H), 7.24 (d,  $J = 8.9$  Hz, 2H), 7.19 (d,  $J = 8.9$  Hz, 2H), 7.16 – 7.10 (m, 1H);  $^{13}\text{C}$  NMR (126 MHz,  $\text{CDCl}_3$ )  $\delta$  152.7, 149.8, 149.4, 138.5, 132.3 (dd,  $J = 100.7, 35.6$  Hz), 132.1, 131.4, 131.3, 129.3, 128.5, 127.9, 127.6, 126.0, 125.8, 125.5, 125.2 (dd,  $J = 3.7, 3.2$  Hz), 123.9, 123.4, 123.2, 122.5, 122.5, 121.71, 121.68, 120.0, 118.5, 112.3, 109.4;  $^{19}\text{F}$  NMR (471 MHz,  $\text{CDCl}_3$ )  $\delta$  -63.4; IR (KBr,  $\text{cm}^{-1}$ ) 3062, 2962, 2860, 1618, 1589, 1492, 1445, 1360, 1263, 1112, 1087, 1017, 803, 741; HRMS (ESI) Calcd for  $\text{C}_{31}\text{H}_{17}\text{BrF}_2\text{N}_2\text{NaO}$  ( $\text{M}+\text{Na}$ ) $^+$  573.0384, Found 573.0377; HPLC: INA column, 90:10 hexanes:isopropanol, 1.00 mL/min,  $t_{\text{R}}$  = major: 7.4 min, minor: 5.4 min, 91:9 er;  $[\alpha]_{\text{D}}^{24}$  -7.2 $^\circ$  (c 0.13,  $\text{CH}_2\text{Cl}_2$ ).

**2-(4-bromophenyl)-3-(2-(3,5-dichlorophenyl)naphtho[2,1-b]furan-1-yl)-2H-indazole (5f)**

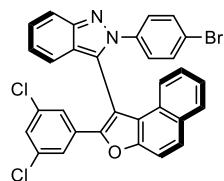

Yield 96%, pale solid, m. p. 225-226  $^\circ\text{C}$ ,  $R_{\text{f}} = 0.6$  (DCM/petroleum ether = 1/4);  $^1\text{H}$  NMR (500 MHz,  $\text{CDCl}_3$ )  $\delta$  7.96 (dd,  $J = 8.3, 4.1$  Hz, 2H), 7.88 (d,  $J = 9.0$  Hz, 1H), 7.75 (d,  $J = 9.0$  Hz, 1H), 7.49 – 7.43 (m, 2H), 7.43 – 7.36 (m, 2H), 7.32 – 7.25 (m, 3H), 7.25 – 7.18 (m, 3H), 7.16 – 7.09 (m, 1H), 7.03 (s, 2H);  $^{13}\text{C}$  NMR (126 MHz,  $\text{CDCl}_3$ )  $\delta$  152.4, 149.84, 149.75, 138.7, 135.5, 132.14, 132.07, 131.2, 129.2, 128.4, 128.0, 127.8, 127.6, 127.4, 126.5, 126.0, 125.3, 123.8, 123.6, 123.5, 123.1, 122.5, 122.4, 120.3, 118.4, 112.2, 108.5; IR (KBr,  $\text{cm}^{-1}$ ) 3063, 2963, 1586, 1494, 1409, 1365, 1262, 1211, 1099, 1010, 801, 742; HRMS (ESI) Calcd for  $\text{C}_{31}\text{H}_{17}\text{BrCl}_2\text{N}_2\text{NaO}$  ( $\text{M}+\text{Na}$ ) $^+$  604.9793, Found 604.9792; HPLC: INA column, 90:10 hexanes:isopropanol, 1.00 mL/min,  $t_{\text{R}}$  = major: 7.3 min, minor: 4.9 min, 93:7 er;  $[\alpha]_{\text{D}}^{24}$  -54.4 $^\circ$  (c 0.063,  $\text{CH}_2\text{Cl}_2$ ).

**dimethyl 5-(1-(2-(4-bromophenyl)-2H-indazol-3-yl)naphtho[2,1-b]furan-2-yl)isophthalate (5g)**

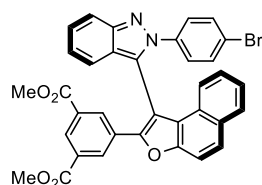

Yield 99%, pale solid, m. p. 220-222  $^\circ\text{C}$ ,  $R_{\text{f}} = 0.5$  (DCM/EtOAc/petroleum ether = 40/1/40);  $^1\text{H}$  NMR (500 MHz,  $\text{CDCl}_3$ )  $\delta$  8.50 (s, 1H), 8.07 – 7.93 (m, 4H), 7.89 (d,  $J = 8.9$  Hz, 1H), 7.80 (d,  $J = 8.9$  Hz, 1H), 7.51 – 7.41 (m, 4H), 7.31 (t,  $J = 7.6$  Hz, 1H), 7.25 – 7.18 (m, 4H), 7.12 (dd,  $J = 8.5, 6.5$  Hz, 1H), 3.86 (s, 6H);  $^{13}\text{C}$  NMR (126 MHz,  $\text{CDCl}_3$ )  $\delta$  165.4, 152.4, 150.8, 149.8, 138.7, 132.0, 131.3, 131.2, 130.33, 130.27, 130.25, 129.2, 127.7, 127.6, 127.4, 126.8, 126.0, 125.3, 123.6, 123.5, 123.4, 122.5, 122.4, 120.3, 118.3, 112.4, 108.1, 52.45; IR (KBr,  $\text{cm}^{-1}$ ) 3059, 2952, 1729, 1598, 1495, 1439, 1302, 1246, 1005, 815, 749; HRMS (ESI) Calcd for  $\text{C}_{35}\text{H}_{24}\text{BrN}_2\text{O}_5$  ( $\text{M}+\text{H}$ ) $^+$  631.0863, Found 631.0870; HPLC: INA column, 80:20 hexanes:isopropanol, 1.00 mL/min,  $t_{\text{R}}$  = major: 9.9 min, minor: 6.3 min, 92:8 er;  $[\alpha]_{\text{D}}^{24}$  -101.6 $^\circ$  (c 0.047,  $\text{CH}_2\text{Cl}_2$ ). For HPLC data after recrystallization:  $t_{\text{R}}$  = major: 10.8 min, minor: 7.3 min, > 99:1 er.

**2-(4-bromophenyl)-3-(2-(3,5-dimethoxyphenyl)naphtho[2,1-b]furan-1-yl)-2H-indazole (5h)**

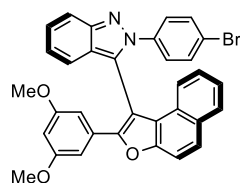

Yield 99%, pale solid, m. p. 78-79  $^\circ\text{C}$   $R_{\text{f}} = 0.5$  (EtOAc/petroleum ether = 1/10);  $^1\text{H}$  NMR (500 MHz,  $\text{CDCl}_3$ )  $\delta$  7.86 (dd,  $J = 18.1, 8.5$  Hz, 2H), 7.76 (d,  $J = 9.0$  Hz, 1H), 7.69 (d,  $J = 8.9$  Hz, 1H), 7.42 (d,  $J = 8.4$  Hz, 1H), 7.39 – 7.32 (m, 2H), 7.29 (d,  $J = 8.3$  Hz, 1H), 7.21 (s, 1H), 7.18 – 7.11 (m, 4H), 7.04 (dd,  $J = 8.5, 6.6$  Hz, 1H), 6.30 (d,  $J = 2.2$  Hz, 2H), 6.27 (d,  $J = 2.3$  Hz, 1H), 3.43 (s, 6H);  $^{13}\text{C}$  NMR (126 MHz,  $\text{CDCl}_3$ )  $\delta$  159.9, 152.1, 150.9, 148.6, 137.8, 130.9, 130.03, 130.00, 128.1, 126.7, 126.6, 126.0, 125.9, 125.1, 124.0, 122.2, 121.4, 121.1, 119.6, 117.0,



111.3, 105.6, 102.3, 101.2, 54.2; IR (KBr,  $\text{cm}^{-1}$ ) 3059, 2959, 2850, 1595, 1494, 1461, 1417, 1357, 1261, 1200, 1153, 1017, 802; HRMS (ESI) Calcd for  $\text{C}_{33}\text{H}_{23}\text{BrN}_2\text{NaO}_3$  ( $\text{M}+\text{Na}$ )<sup>+</sup> 597.0784, Found 597.0783; HPLC: INC column, 95:5 hexanes:isopropanol, 1.00 mL/min,  $t_{\text{R}}$  = major: 8.0 min, minor: 8.6 min, 97:3 er;  $[\alpha]_{\text{D}}^{24}$  -57.6° (c 0.035,  $\text{CH}_2\text{Cl}_2$ ).

### 3.8 Procedures for late-modification of chiral isoindazoles

#### Procedures for C-H alkenylation of chiral isoindazoles<sup>[5]</sup>

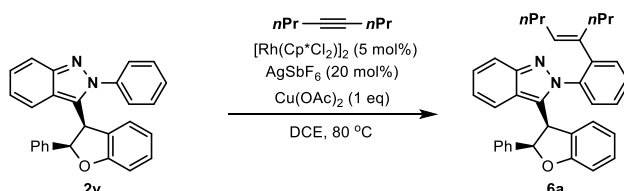

In a Schlenk tube with a magnetic bar under nitrogen atmosphere, **2v** (0.1 mmol, 38.8 mg), DCE (0.05 M, 2 ml),  $[\text{Rh}(\text{Cp}^*\text{Cl}_2)]_2$  (5 mol%, 3.9 mg),  $\text{AgSbF}_6$  (20 mol%, 6.86 mg),  $\text{Cu}(\text{OAc})_2$  (1 eq, 18.8 mg), alkyne (1.2 eq, 13.2 mg) were added. The mixtures were stirred at 80 °C until the starting material was consumed (TLC detected). After rapid filtration of silica gel, the solvent was evaporated by rotary evaporator, and the residue was purified by flash column chromatography on silica gel using EtOAc/petroleum ether as eluent to afford the product **6a** (0.076 mmol, 37.8 mg).

#### 2-(2-((E)-oct-4-en-4-yl)phenyl)-3-((2R,3R)-2-phenyl-2,3-dihydrobenzofuran-3-yl)-2H-indazole (6a)

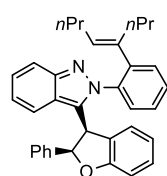

Yield 76%, > 99:1 dr, pale solid, m. p. 150-151 °C,  $R_f$  = 0.5 (EtOAc/petroleum ether = 1/40);  $^1\text{H}$  NMR (500 MHz,  $\text{CDCl}_3$ )  $\delta$  7.54 (d,  $J$  = 8.6 Hz, 1H), 7.43 (t,  $J$  = 7.5 Hz, 1H), 7.35 (t,  $J$  = 7.9 Hz, 2H), 7.23 (d,  $J$  = 7.3 Hz, 1H), 7.17 – 7.08 (m, 2H), 7.06 (d,  $J$  = 8.0 Hz, 1H), 7.04 – 6.94 (m, 4H), 6.74 (t,  $J$  = 7.7 Hz, 3H), 6.37 – 6.27 (m, 2H), 5.66 – 5.55 (m, 2H), 5.09 (d,  $J$  = 8.8 Hz, 1H), 2.21 – 2.12 (m, 1H), 2.10 – 1.98 (m, 2H), 1.39 – 1.32 (m, 2H), 1.22 – 1.14 (m, 1H), 1.07 – 0.97 (m, 1H), 0.92 – 0.83 (m, 4H), 0.65 (t,  $J$  = 7.3 Hz, 3H);  $^{13}\text{C}$  NMR (126 MHz,  $\text{CDCl}_3$ )  $\delta$  160.3, 148.4, 141.1, 140.1, 136.5, 136.1, 133.9, 133.1, 130.7, 129.6, 129.3, 128.4, 127.8, 127.5, 127.4, 127.2, 126.3, 125.9, 121.6, 121.3, 120.5, 117.6, 110.0, 88.1, 45.7, 31.0, 30.6, 22.8, 21.9, 13.9, 13.7; IR (KBr,  $\text{cm}^{-1}$ ) 3060, 2959, 2868, 1730, 1599, 1552, 1464, 1378, 1268, 1229, 1092, 1023, 803, 750; HRMS (ESI) Calcd for  $\text{C}_{35}\text{H}_{35}\text{N}_2\text{O}$  ( $\text{M}+\text{H}$ )<sup>+</sup> 499.2744, Found 499.2738; HPLC: INA column, 90:10 hexanes:isopropanol, 1.00 mL/min,  $t_{\text{R}}$  = major: 4.4 min, minor: 4.1 min, 97:3 er;  $[\alpha]_{\text{D}}^{24}$  321.6° (c 0.083,  $\text{CH}_2\text{Cl}_2$ ).

#### Procedures for C-H allylation of chiral isoindazoles<sup>[6]</sup>

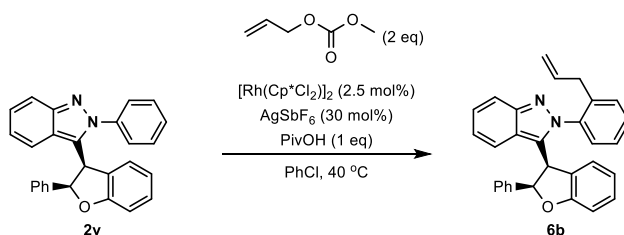

In a Schlenk tube with a magnetic bar under nitrogen atmosphere, **2v** (0.1 mmol, 38.8 mg),  $\text{PhCl}$  (0.1

M, 1 ml), [Rh(Cp\*Cl<sub>2</sub>)<sub>2</sub>] (2.5 mol%, 1.9 mg), AgSbF<sub>6</sub> (30 mol%, 10.3 mg), PivOH (1 eq, 10.2 mg), allyl carbonic ester (2 eq, 23.2 mg) were added. The mixtures were stirred at 40 °C until the starting material was consumed (TLC detected). After rapid filtration of silica gel, the solvent was evaporated by rotary evaporator, and the residue was purified by flash column chromatography on silica gel using EtOAc/petroleum ether as eluent to afford the product **6b** (0.083 mmol, 35.5 mg).

The procedures of the following substrate **4a** for accessing **6i** were similar with that mentioned above.

### 2-((2-allylphenyl)-3-((2R,3R)-2-phenyl-2,3-dihydrobenzofuran-3-yl)-2H-indazole (6b)

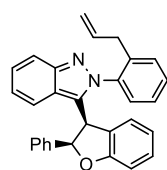

Yield 83%, > 99:1 dr, pale solid, m. p. 112-113 °C,  $R_f = 0.6$  (EtOAc/petroleum ether = 1/20); <sup>1</sup>H NMR (400 MHz, CDCl<sub>3</sub>)  $\delta$  7.57 (d,  $J = 8.8$  Hz, 1H), 7.50 – 7.45 (m, 1H), 7.41 – 7.32 (m, 2H), 7.25 – 7.20 (m, 1H), 7.19 – 7.13 (m, 2H), 7.11 – 7.04 (m, 4H), 6.98 – 6.92 (m, 3H), 6.80 (dd,  $J = 8.6, 6.6$  Hz, 1H), 6.54 (d,  $J = 8.6$  Hz, 1H), 6.39 (d,  $J = 7.8$  Hz, 1H), 5.88 – 5.78 (m, 1H), 5.72 (d,  $J = 8.5$  Hz, 1H), 5.08 – 4.98 (m, 2H), 4.89 (d,  $J = 8.5$  Hz, 1H), 3.06 (d,  $J = 6.6$  Hz, 2H); <sup>13</sup>C NMR (101 MHz, CDCl<sub>3</sub>)  $\delta$  160.2, 148.5, 137.8, 137.0, 136.0, 135.3, 133.9, 130.1, 129.84, 129.77, 128.7, 128.6, 128.0, 127.4, 127.3, 126.8, 126.2, 126.0, 121.9, 121.7, 121.3, 120.6, 117.6, 117.3, 110.2, 88.2, 45.8, 34.6; IR (KBr, cm<sup>-1</sup>) 3063, 2928, 1597, 1467, 1381, 1272, 1227, 1159, 1095, 988, 962, 749, 695; HRMS (ESI) Calcd for C<sub>30</sub>H<sub>25</sub>N<sub>2</sub>O (M+H)<sup>+</sup> 429.1962, Found 429.1966; HPLC: INA column, 90:10 hexanes:isopropanol, 1.00 mL/min,  $t_R$  = major: 9.2 min, minor: 7.2 min, 98:2 er;  $[\alpha]_D^{24} 93.7^\circ$  (c 0.12, CH<sub>2</sub>Cl<sub>2</sub>).

### Procedures for C-H alkylation of chiral isoindazoles<sup>[7]</sup>

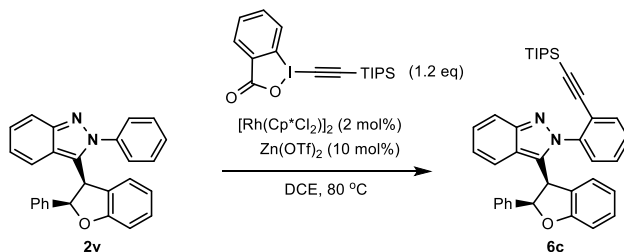

In a Schlenk tube with a magnetic bar under nitrogen atmosphere, **2v** (0.1 mmol, 38.8 mg), DCE (0.1 M, 1 ml), [Rh(Cp\*Cl<sub>2</sub>)<sub>2</sub>] (2 mol%, 1.6 mg), Zn(OTf)<sub>2</sub> (10 mol%, 3.6 mg), alkyne (1.2 eq, 51.3 mg) were added. The mixtures were stirred at 80 °C until the starting material was consumed (TLC detected). After rapid filtration of silica gel, the solvent was evaporated by rotary evaporator, and the residue was purified by flash column chromatography on silica gel using EtOAc/petroleum ether as eluent to afford the product **6c** (0.078 mmol, 44.3 mg).

### 3-((2R,3R)-2-phenyl-2,3-dihydrobenzofuran-3-yl)-2-((triisopropylsilyl)ethynyl)phenyl)-2H-indazole (6c)

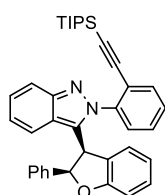

Yield 78%, > 99:1 dr, pale solid, m. p. 134-135 °C,  $R_f = 0.7$  (EtOAc/petroleum ether = 1/20); <sup>1</sup>H NMR (400 MHz, CDCl<sub>3</sub>)  $\delta$  7.66 (dd,  $J = 7.7, 1.5$  Hz, 1H), 7.54 – 7.44 (m, 2H), 7.36 – 7.29 (m, 3H), 7.19 – 7.06 (m, 5H), 6.98 (d,  $J = 7.2$  Hz, 2H), 6.89 (t,  $J = 7.4$  Hz, 1H), 6.77 (t,  $J = 7.6$  Hz, 1H), 6.58 (d,  $J = 8.6$  Hz, 1H), 6.45 (d,  $J = 7.9$  Hz, 1H), 5.72 (d,  $J = 8.4$  Hz, 1H), 4.89 (d,  $J = 8.4$  Hz, 1H), 0.93 – 0.85 (m, 12H), 0.75 (d,  $J = 5.6$  Hz, 9H); <sup>13</sup>C NMR (101 MHz, CDCl<sub>3</sub>)  $\delta$  160.0, 148.7, 140.4, 136.0, 134.0,

133.7, 129.7, 129.6, 128.69, 128.66, 128.6, 128.0, 127.7, 127.4, 126.9, 125.9, 123.0, 121.5, 121.4, 121.3, 120.5, 117.7, 110.0, 101.7, 97.0, 88.5, 45.8, 18.4, 18.2, 11.1; IR (KBr,  $\text{cm}^{-1}$ ) 3061, 2942, 2892, 2864, 2156, 1599, 1540, 1459, 1231, 1094, 1018, 801, 746; HRMS (ESI) Calcd for  $\text{C}_{38}\text{H}_{41}\text{N}_2\text{OSi}$  ( $\text{M}+\text{H}$ )<sup>+</sup> 569.2983, Found 569.2990; HPLC: INA column, 90:10 hexanes:isopropanol, 1.00 mL/min,  $t_{\text{R}}$  = major: 7.3 min, minor: 4.6 min, 98:2 er;  $[\alpha]_{\text{D}}^{24}$  23.8° (c 0.14,  $\text{CH}_2\text{Cl}_2$ ).

### Procedures for C-H alkylation of chiral isoindazoles<sup>[8]</sup>

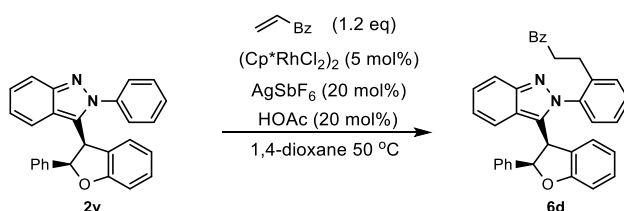

In a Schlenk tube with a magnetic bar under nitrogen atmosphere, **2v** (0.1 mmol, 38.8 mg), 1,4-dioxane (0.1 M, 1 ml),  $[\text{Rh}(\text{Cp}^*\text{Cl}_2)_2]$  (5 mol%, 3.9 mg),  $\text{AgSbF}_6$  (20 mol%, 6.86 mg), HOAc (20 mol%, 1.2 mg), alkene (1.2 eq, 15.8 mg) were added. The mixtures were stirred at 50 °C until the starting material was consumed (TLC detected). After rapid filtration of silica gel, the solvent was evaporated by rotary evaporator, and the residue was purified by flash column chromatography on silica gel using EtOAc /petroleum ether as eluent to afford the product **6d** (0.076 mmol, 39.5 mg).

The procedures of the following substrate **4a** for accessing **6h** were similar with that mentioned above.

### 1-phenyl-3-(2-(3-((2*R*,3*R*)-2-phenyl-2,3-dihydrobenzofuran-3-yl)-2*H*-indazol-2-yl)phenyl)propan-1-one (**6d**)

Yield 76%, > 99:1 dr, pale solid, m. p. 75-76 °C,  $R_{\text{f}}$  = 0.4 (EtOAc/petroleum ether = 1/20); <sup>1</sup>H NMR (400 MHz,  $\text{CDCl}_3$ )  $\delta$  7.67 (d,  $J$  = 7.6 Hz, 2H), 7.56 (d,  $J$  = 8.8 Hz, 1H), 7.52 – 7.40 (m, 4H), 7.33 (t,  $J$  = 7.8 Hz, 2H), 7.23 (d,  $J$  = 7.8 Hz, 1H), 7.20 – 7.13 (m, 2H), 7.08 (d,  $J$  = 8.3 Hz, 2H), 7.05 – 7.01 (m, 1H), 6.94 – 6.87 (m, 3H), 6.85 – 6.77 (m, 1H), 6.71 (s, 1H), 6.54 (d,  $J$  = 8.6 Hz, 1H), 6.35 (d,  $J$  = 7.7 Hz, 1H), 5.72 (d,  $J$  = 8.5 Hz, 1H), 4.93 (d,  $J$  = 8.6 Hz, 1H), 3.24 – 2.92 (m, 3H), 2.73 – 2.59 (m, 1H); <sup>13</sup>C NMR (101 MHz,  $\text{CDCl}_3$ )  $\delta$  199.0, 160.1, 148.6, 138.0, 137.9, 136.3, 136.0, 134.0, 133.1, 130.4, 129.7, 129.0, 128.7, 128.5, 128.1, 128.0, 127.4, 127.3, 127.0, 126.3, 126.1, 122.0, 121.8, 121.5, 120.7, 117.6, 110.1, 88.2, 45.9, 39.5, 26.4; IR (KBr,  $\text{cm}^{-1}$ ) 3061, 2927, 1718, 1683, 1596, 1496, 1457, 1379, 1231, 1160, 1018, 747, 696; HRMS (ESI) Calcd for  $\text{C}_{36}\text{H}_{29}\text{N}_2\text{O}_2$  ( $\text{M}+\text{H}$ )<sup>+</sup> 521.2224, Found 521.2228; HPLC: INA column, 95:5 hexanes:isopropanol, 1.00 mL/min,  $t_{\text{R}}$  = major: 34.5 min, minor: 40.9 min, 98:2 er;  $[\alpha]_{\text{D}}^{24}$  90.2° (c 0.13,  $\text{CH}_2\text{Cl}_2$ ).

### Procedures for C-H amidation of chiral isoindazoles<sup>[9]</sup>

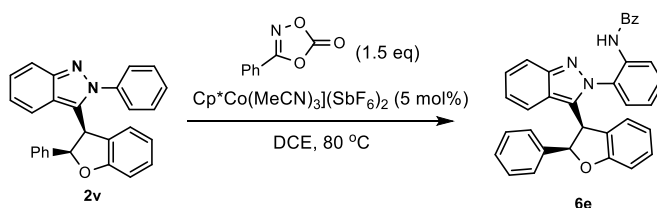

In a Schlenk tube with a magnetic bar under nitrogen atmosphere, **2v** (0.1 mmol, 38.8 mg), DCE (0.1

M, 1 ml), Cp\*Co(MeCN)<sub>3</sub>(SbF<sub>6</sub>)<sub>2</sub> (5 mol%, 2.7 mg), amination reagent (1.5 eq, 24.5 mg) were added. The mixtures were stirred at 80 °C until the starting material was consumed (TLC detected). After rapid filtration of silica gel, the solvent was evaporated by rotary evaporator, and the residue was purified by flash column chromatography on silica gel using EtOAc /petroleum ether as eluent to afford the product **6e** (0.099 mmol, 50.2 mg).

The procedures of the following substrate **4a** for accessing **6g** were similar with that mentioned above.

### *N*-(2-(3-((2*R*,3*R*)-2-phenyl-2,3-dihydrobenzofuran-3-yl)-2*H*-indazol-2-yl)phenyl)benzamide (**6e**)

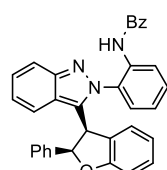

Yield 99%, > 99:1 dr, pale solid, m. p. 184-186 °C, *R*<sub>f</sub> = 0.5 (DCM/petroleum ether = 1/1); <sup>1</sup>H NMR (400 MHz, CDCl<sub>3</sub>) δ 9.49 (br, 1H), 8.77 (d, *J* = 8.0 Hz, 1H), 7.60 – 7.50 (m, 4H), 7.49 – 7.44 (m, 1H), 7.39 – 7.31 (m, 5H), 7.25 – 7.21 (m, 1H), 7.20 – 7.09 (m, 2H), 6.96 (t, *J* = 7.3 Hz, 1H), 6.87 – 6.76 (m, 3H), 6.75 – 6.62 (m, 3H), 6.43 (br, 1H), 5.82 (d, *J* = 9.0 Hz, 1H), 5.53 (br, 1H); <sup>13</sup>C NMR (101 MHz, CDCl<sub>3</sub>) δ 164.7, 160.1, 149.1, 135.5, 134.6, 134.1, 131.9, 130.4, 130.0, 128.6, 127.9, 127.8, 127.6, 127.20, 127.17, 126.9, 126.0, 125.8, 123.7, 122.7, 122.1, 122.0, 121.8, 121.3, 116.5, 110.4, 87.8, 45.4; IR (KBr, cm<sup>-1</sup>) 3310, 3060, 2961, 2927, 1679, 1596, 1527, 1461, 1309, 1263, 1099, 1024, 800, 750, 699; HRMS (ESI) Calcd for C<sub>34</sub>H<sub>26</sub>N<sub>3</sub>O<sub>2</sub> (M+H)<sup>+</sup> 508.2020, Found 508.2020; HPLC: INA column, 80:20 hexanes:isopropanol, 1.00 mL/min, *t*<sub>R</sub> = major: 9.5 min, minor: 43.8 min, 98:2 er; [α]<sub>D</sub><sup>24</sup> 32.3° (c 0.17, CH<sub>2</sub>Cl<sub>2</sub>).

### Procedures for C-H selenylation of chiral isoindazoles<sup>[10]</sup>

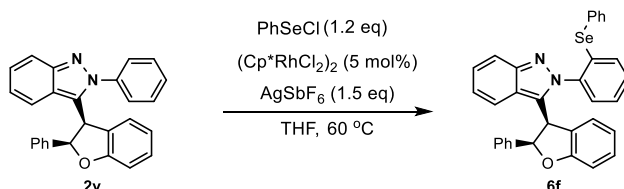

In a Schlenk tube with a magnetic bar under nitrogen atmosphere, **2v** (0.1 mmol, 38.8 mg), THF (0.1 M, 1 ml), [Rh(Cp\*Cl<sub>2</sub>)<sub>2</sub>] (5 mol%, 3.9 mg), AgSbF<sub>6</sub> (1.5 eq, 17.2 mg), PhSeCl (1.2 eq, 22.9 mg) were added. The mixtures were stirred at 60 °C until the starting material was consumed. After rapid filtration of silica gel, the solvent was evaporated by rotary evaporator, and the residue was purified by flash column chromatography on silica gel using THF/petroleum ether as eluent to afford the product **6f** (0.076 mmol, 41.3 mg).

### 3-((2*R*,3*R*)-2-phenyl-2,3-dihydrobenzofuran-3-yl)-2-(2-(phenylselanyl)phenyl)-2*H*-indazole (**6f**)

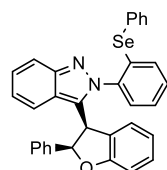

Yield 76%, > 99:1 dr, pale solid, m. p. 196-198 °C, *R*<sub>f</sub> = 0.3 (THF/petroleum ether = 1/20); <sup>1</sup>H NMR (500 MHz, CDCl<sub>3</sub>) δ 7.58 (d, *J* = 7.8 Hz, 3H), 7.45 (d, *J* = 5.9 Hz, 1H), 7.40 – 7.32 (m, 4H), 7.29 – 7.26 (m, 1H), 7.19 – 7.13 (m, 3H), 7.12 – 7.05 (m, 4H), 7.00 – 6.94 (m, 3H), 6.84 – 6.77 (m, 1H), 6.53 (d, *J* = 8.6 Hz, 1H), 6.34 (s, 1H), 5.77 (d, *J* = 8.4 Hz, 1H), 5.10 (s, 1H); <sup>13</sup>C NMR (126 MHz, CDCl<sub>3</sub>) δ 160.2, 148.9, 137.8, 136.2, 136.0, 134.0, 133.6, 130.4, 130.3, 130.2, 129.8, 129.7, 129.2, 129.0, 128.6, 128.0, 127.7, 127.5, 126.6, 126.5, 126.3, 121.9, 121.8, 121.6, 120.7, 117.8, 110.0, 88.3, 46.0; IR (KBr, cm<sup>-1</sup>) 3058, 2960, 2924, 2853, 1620, 1480, 1458, 1262, 1231, 1096, 1021, 801, 743; HRMS (ESI) Calcd for

C<sub>33</sub>H<sub>25</sub>N<sub>2</sub>OSe (M+H)<sup>+</sup> 545.1127, Found 545.1129; HPLC: OD-H column, 90:10 hexanes:isopropanol, 1.00 mL/min, t<sub>R</sub> = major: 8.9 min, minor: 17.8 min, 98:2 er; [α]<sub>D</sub><sup>24</sup> 29.4° (c 0.13, CH<sub>2</sub>Cl<sub>2</sub>).

***N*-(5-bromo-2-(3-((1*R*,2*R*)-2-phenyl-1,2-dihydronaphtho[2,1-*b*]furan-1-yl)-2*H*-indazol-2-yl)phenyl)-benzamide (6g)**

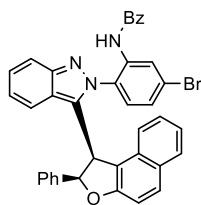

Yield 81%, > 99:1 dr, pale solid, m. p. 108-109 °C, R<sub>f</sub> = 0.4 (EtOAc/petroleum ether = 1/10); <sup>1</sup>H NMR (500 MHz, CDCl<sub>3</sub>) δ 9.56 (s, 1H), 9.08 (s, 1H), 7.92 (d, *J* = 8.8 Hz, 1H), 7.82 (d, *J* = 8.1 Hz, 1H), 7.55 (d, *J* = 8.8 Hz, 1H), 7.51 (d, *J* = 7.4 Hz, 2H), 7.46 (dd, *J* = 7.1, 3.4 Hz, 2H), 7.37 (d, *J* = 8.8 Hz, 1H), 7.32 (t, *J* = 7.7 Hz, 2H), 7.23 – 7.08 (m, 4H), 7.07 – 6.77 (m, 5H), 6.77 – 6.58 (m, 2H), 6.48 (s, 1H), 5.99 (d, *J* = 8.9 Hz, 1H), 5.72 (s, 1H); <sup>13</sup>C NMR (126 MHz, CDCl<sub>3</sub>) δ 164.6, 158.1, 149.4, 135.9, 135.3, 135.2, 133.7, 132.1, 131.4, 130.6, 130.0, 129.1, 128.7, 128.6, 128.3, 128.1, 127.8, 127.6, 127.6, 127.2, 126.8, 126.5, 125.3, 124.2, 123.6, 122.6, 122.3, 121.9, 120.8, 118.4, 116.6, 112.1, 89.2, 44.9; IR (KBr, cm<sup>-1</sup>) 3316, 2961, 2929, 1771, 1650, 1539, 1263, 1022, 802, 743, 702; HRMS (ESI) Calcd for C<sub>38</sub>H<sub>27</sub>BrN<sub>3</sub>O<sub>2</sub> (M+H)<sup>+</sup> 636.1281, Found 636.1288; HPLC: OD-H column, 70:30 hexanes:isopropanol, 0.80 mL/min, t<sub>R</sub> = major: 16.3 min, minor: 11.9 min, 96:4 er; [α]<sub>D</sub><sup>24</sup> 80.5° (c 0.17, CH<sub>2</sub>Cl<sub>2</sub>).

***3*-(5-bromo-2-(3-(2-phenyl-naphtho[2,1-*b*]furan-1-yl)-2*H*-indazol-2-yl)phenyl)-1-phenylpropan-1-one (6h)**

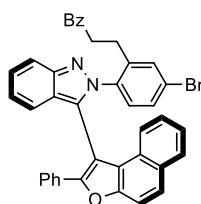

Yield 80%, pale solid, m. p. 81-82 °C, R<sub>f</sub> = 0.4 (EtOAc/petroleum ether = 1/20); <sup>1</sup>H NMR (500 MHz, CDCl<sub>3</sub>) δ 7.94 (d, *J* = 8.8 Hz, 1H), 7.85 (d, *J* = 8.1 Hz, 1H), 7.76 (d, *J* = 9.0 Hz, 1H), 7.74 – 7.62 (m, 3H), 7.59 (d, *J* = 8.4 Hz, 1H), 7.52 (dd, *J* = 7.8, 7.3 Hz, 2H), 7.40 – 7.26 (m, 5H), 7.26 – 7.14 (m, 6H), 7.08 (t, *J* = 7.7 Hz, 1H), 6.87 (dd, *J* = 8.5, 2.2 Hz, 1H), 6.56 (d, *J* = 8.5 Hz, 1H), 3.10 – 2.96 (m, 1H), 2.91 – 2.82 (m, 1H), 2.49 – 2.33 (m, 2H); <sup>13</sup>C NMR (126 MHz, CDCl<sub>3</sub>) δ 198.4, 154.1, 152.0, 149.3, 140.6, 137.5, 136.3, 133.0, 132.9, 131.0, 129.8, 129.7, 129.2, 129.1, 129.1, 128.8, 128.4, 128.2, 127.5, 127.5, 126.9, 126.8, 126.7, 124.9, 123.6, 123.4, 123.2, 123.1, 122.5, 120.6, 118.4, 112.2, 105.7, 40.1, 25.8; IR (KBr, cm<sup>-1</sup>) 3059, 2966, 2927, 1683, 1651, 1540, 1453, 1261, 1023, 804, 745; HRMS (ESI) Calcd for C<sub>40</sub>H<sub>28</sub>BrN<sub>2</sub>O<sub>2</sub> (M+H)<sup>+</sup> 647.1329, Found 647.1330; HPLC: INA column, 90:10 hexanes:isopropanol, 1.00 mL/min, t<sub>R</sub> = major: 12.0 min, minor: 8.5 min, 91:9 er; [α]<sub>D</sub><sup>24</sup> -1.7° (c 0.12, CH<sub>2</sub>Cl<sub>2</sub>).

***2*-(2-allyl-4-bromophenyl)-3-(2-phenyl-naphtho[2,1-*b*]furan-1-yl)-2*H*-indazole (6i)**

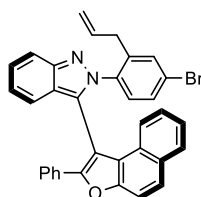

Yield 85%, pale solid, m. p. 94-95 °C, R<sub>f</sub> = 0.6 (EtOAc/petroleum ether = 1/20); <sup>1</sup>H NMR (500 MHz, CDCl<sub>3</sub>) δ 7.95 (d, *J* = 8.7 Hz, 2H), 7.80 (d, *J* = 9.0 Hz, 1H), 7.71 (d, *J* = 8.9 Hz, 1H), 7.60 (d, *J* = 8.4 Hz, 1H), 7.49 (dd, *J* = 8.6, 7.5 Hz, 1H), 7.46 – 7.38 (m, 2H), 7.33 – 7.25 (m, 6H), 7.22 – 7.13 (m, 2H), 6.86 (dd, *J* = 8.5, 2.2 Hz, 1H), 6.57 (d, *J* = 8.5 Hz, 1H), 5.29 (ddt, *J* = 16.9, 10.1, 6.8 Hz, 1H), 4.84 (d, *J* = 10.0 Hz, 1H), 4.68 (d, *J* = 17.2 Hz, 1H), 2.92 (dd, *J* = 16.1, 7.0 Hz, 1H), 2.73 (dd, *J* = 16.2, 6.0 Hz, 1H); <sup>13</sup>C NMR (126 MHz, CDCl<sub>3</sub>) δ 154.0, 152.0, 149.2, 139.2, 137.2, 134.8, 132.4, 131.0, 129.9, 129.6, 129.1, 129.09, 129.08, 128.8, 128.5, 127.6, 127.4, 126.9, 126.8,

126.7, 124.9, 123.5, 123.4, 123.2, 123.1, 122.7, 120.6, 118.4, 117.5, 112.3, 105.7, 34.6; IR (KBr,  $\text{cm}^{-1}$ ) 3060, 2961, 2927, 1736, 1680, 1491, 1261, 920, 745, 712; HRMS (ESI) Calcd for  $\text{C}_{34}\text{H}_{24}\text{BrN}_2\text{O}$  ( $\text{M}+\text{H}$ )<sup>+</sup> 555.1067, Found 555.1072; HPLC: INA column, 90:10 hexanes:isopropanol, 1.00 mL/min,  $t_{\text{R}}$  = major: 6.1 min, minor: 5.0 min, 91:9 er;  $[\alpha]_{\text{D}}^{24}$   $-1.3^\circ$  (c 0.078,  $\text{CH}_2\text{Cl}_2$ ).

### 3.9. Reference

- [1] a) Hu, Y.; Wang, Z.; Yang, H.; Chen, J.; Zhou, L.; Wu, Z.; Lei, Y. *Chem. Sci.*, **2019**, *10*, 6777–6784. b) Morales-Rivera, C. A.; Floreancig, P.; Liu, P. *J. Am. Chem. Soc.* **2017**, *139*, 17935–17944.
- [2] Priewisch, B.; Rück-Braun, K. *J. Org. Chem.*, **2005**, *70*, 2350–2352.
- [3] Fang, Y.; Wang, C.; Su, S.; Yu, H.; Huang, Y. *Org. Biomol. Chem.*, **2014**, *12*, 1061–1071.
- [4] Wei, W.; Li, X.; Gu, M.; Yao, H.; Lin, A. *Org. Biomol. Chem.*, **2017**, *15*, 8458–8462.
- [5] Davies, D. L.; Ellul, C. E.; Macgregor, S. A.; McMullin, C. L.; Singh, K. *J. Am. Chem. Soc.*, **2015**, *137*, 9659–9669.
- [6] Wang, H.; Schröder, N.; Glorius, F. *Angew. Chem., Int. Ed.*, **2013**, *52*, 5386–5389.
- [7] Xie, F.; Qi, Z.; Yu, S.; Li, X. *J. Am. Chem. Soc.*, **2014**, *136*, 4780–4787.
- [8] Boerth, J. A.; Hummel, J. R.; Ellman, J. A. *Angew. Chem. Int. Ed.*, **2016**, *55*, 12650–12654.
- [9] Liang, Y.; Liang, Y.; Tang, C.; Yuan, Y.; Jiao, N. *Chem. Eur. J.*, **2015**, *21*, 16395–16399.
- [10] Yu, S.; Wan, B.; Li, X. *Org. Lett.*, **2015**, *17*, 58–61.

## 4. X-Ray diffraction analysis

### 4.1 Crystal data and structure refinement for 2h

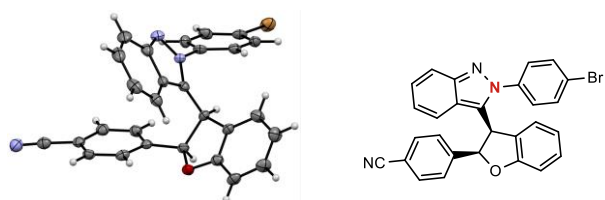

|                                               |                                                               |
|-----------------------------------------------|---------------------------------------------------------------|
| CCDC                                          | 2105966                                                       |
| Identification code                           | 9st-147                                                       |
| Empirical formula                             | $C_{28}H_{18}BrN_3O$                                          |
| Formula weight                                | 492.36                                                        |
| Temperature/K                                 | 99.98(10)                                                     |
| Crystal system                                | monoclinic                                                    |
| Space group                                   | I2                                                            |
| $a/\text{\AA}$                                | 20.2119(12)                                                   |
| $b/\text{\AA}$                                | 7.9865(4)                                                     |
| $c/\text{\AA}$                                | 28.5833(19)                                                   |
| $\alpha/^\circ$                               | 90                                                            |
| $\beta/^\circ$                                | 99.590(6)                                                     |
| $\gamma/^\circ$                               | 90                                                            |
| Volume/ $\text{\AA}^3$                        | 4549.5(5)                                                     |
| Z                                             | 8                                                             |
| $\rho_{\text{calc}}/\text{cm}^3$              | 1.438                                                         |
| $\mu/\text{mm}^{-1}$                          | 2.664                                                         |
| F(000)                                        | 2000.0                                                        |
| Crystal size/ $\text{mm}^3$                   | $0.13 \times 0.11 \times 0.1$                                 |
| Radiation                                     | Cu $K\alpha$ ( $\lambda = 1.54184$ )                          |
| $2\theta$ range for data collection/ $^\circ$ | 4.986 to 147.196                                              |
| Index ranges                                  | $-19 \leq h \leq 24, -9 \leq k \leq 8, -35 \leq l \leq 33$    |
| Reflections collected                         | 14962                                                         |
| Independent reflections                       | 7084 [ $R_{\text{int}} = 0.0537, R_{\text{sigma}} = 0.0534$ ] |
| Data/restraints/parameters                    | 7084/1/595                                                    |
| Goodness-of-fit on $F^2$                      | 1.056                                                         |
| Final R indexes [ $I \geq 2\sigma(I)$ ]       | $R_1 = 0.0447, wR_2 = 0.1145$                                 |
| Final R indexes [all data]                    | $R_1 = 0.0456, wR_2 = 0.1160$                                 |
| Largest diff. peak/hole / $e \text{\AA}^{-3}$ | 1.19/-0.80                                                    |
| Flack parameter                               | 0.005(11)                                                     |

## 4.2 Crystal data and structure refinement for 4g

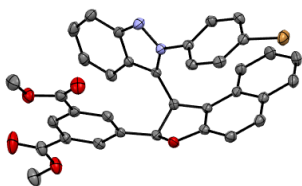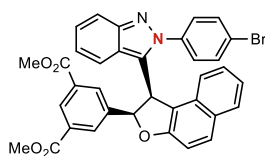

|                                               |                                                               |
|-----------------------------------------------|---------------------------------------------------------------|
| CCDC                                          | 2105967                                                       |
| Identification code                           | 68-3                                                          |
| Empirical formula                             | $C_{35}H_{25}BrN_2O_5$                                        |
| Formula weight                                | 633.48                                                        |
| Temperature/K                                 | 199.99(10)                                                    |
| Crystal system                                | monoclinic                                                    |
| Space group                                   | $P2_1$                                                        |
| $a/\text{\AA}$                                | 7.00919(18)                                                   |
| $b/\text{\AA}$                                | 14.8084(3)                                                    |
| $c/\text{\AA}$                                | 13.4349(3)                                                    |
| $\alpha/^\circ$                               | 90                                                            |
| $\beta/^\circ$                                | 92.747(2)                                                     |
| $\gamma/^\circ$                               | 90                                                            |
| Volume/ $\text{\AA}^3$                        | 1392.88(6)                                                    |
| Z                                             | 2                                                             |
| $\rho_{\text{calc}}/\text{cm}^3$              | 1.510                                                         |
| $\mu/\text{mm}^{-1}$                          | 2.416                                                         |
| F(000)                                        | 648.0                                                         |
| Crystal size/ $\text{mm}^3$                   | $0.12 \times 0.1 \times 0.08$                                 |
| Radiation                                     | Cu $K\alpha$ ( $\lambda = 1.54184$ )                          |
| $2\theta$ range for data collection/ $^\circ$ | 6.586 to 147.578                                              |
| Index ranges                                  | $-8 \leq h \leq 6, -18 \leq k \leq 18, -16 \leq l \leq 16$    |
| Reflections collected                         | 10046                                                         |
| Independent reflections                       | 5469 [ $R_{\text{int}} = 0.0250, R_{\text{sigma}} = 0.0335$ ] |
| Data/restraints/parameters                    | 5469/1/390                                                    |
| Goodness-of-fit on $F^2$                      | 1.027                                                         |
| Final R indexes [ $I \geq 2\sigma(I)$ ]       | $R_1 = 0.0273, wR_2 = 0.0681$                                 |
| Final R indexes [all data]                    | $R_1 = 0.0281, wR_2 = 0.0685$                                 |
| Largest diff. peak/hole / $e \text{\AA}^{-3}$ | 0.20/-0.52                                                    |
| Flack/Hoof parameter                          | -0.019(7)/-0.001(6)                                           |



### 4.3 Crystal data and structure refinement for 5g

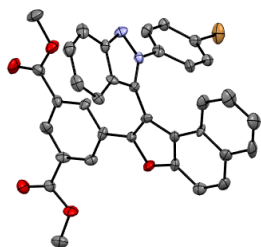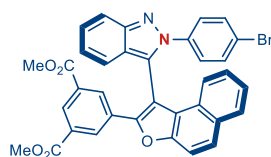

|                                             |                                                                 |
|---------------------------------------------|-----------------------------------------------------------------|
| CCDC                                        | 2105968                                                         |
| Identification code                         | 78-3                                                            |
| Empirical formula                           | C <sub>35</sub> H <sub>23</sub> BrN <sub>2</sub> O <sub>5</sub> |
| Formula weight                              | 631.46                                                          |
| Temperature/K                               | 150.00(10)                                                      |
| Crystal system                              | monoclinic                                                      |
| Space group                                 | P2 <sub>1</sub>                                                 |
| a/Å                                         | 8.9824(12)                                                      |
| b/Å                                         | 10.3845(11)                                                     |
| c/Å                                         | 15.312(2)                                                       |
| α/°                                         | 90                                                              |
| β/°                                         | 92.079(13)                                                      |
| γ/°                                         | 90                                                              |
| Volume/Å <sup>3</sup>                       | 1427.4(3)                                                       |
| Z                                           | 2                                                               |
| ρ <sub>calc</sub> /cm <sup>3</sup>          | 1.469                                                           |
| μ/mm <sup>-1</sup>                          | 1.488                                                           |
| F(000)                                      | 644.0                                                           |
| Crystal size/mm <sup>3</sup>                | 0.14 × 0.12 × 0.1                                               |
| Radiation                                   | Mo Kα (λ = 0.71073)                                             |
| 2θ range for data collection/°              | 4.538 to 59.082                                                 |
| Index ranges                                | -9 ≤ h ≤ 11, -12 ≤ k ≤ 13, -19 ≤ l ≤ 14                         |
| Reflections collected                       | 11864                                                           |
| Independent reflections                     | 6468 [R <sub>int</sub> = 0.0899, R <sub>sigma</sub> = 0.1693]   |
| Data/restraints/parameters                  | 6468/47/400                                                     |
| Goodness-of-fit on F <sup>2</sup>           | 1.037                                                           |
| Final R indexes [I ≥ 2σ (I)]                | R <sub>1</sub> = 0.0849, wR <sub>2</sub> = 0.1807               |
| Final R indexes [all data]                  | R <sub>1</sub> = 0.1301, wR <sub>2</sub> = 0.2153               |
| Largest diff. peak/hole / e Å <sup>-3</sup> | 1.44/-1.31                                                      |
| Flack/Hoof parameter                        | 0.004(14)/0.031(12)                                             |

## 5. Copies of NMR spectrum

*(E)*-1-(2-((2-(benzyloxy)phenyl)ethynyl)phenyl)-2-(4-bromophenyl)diazene (**1a**)

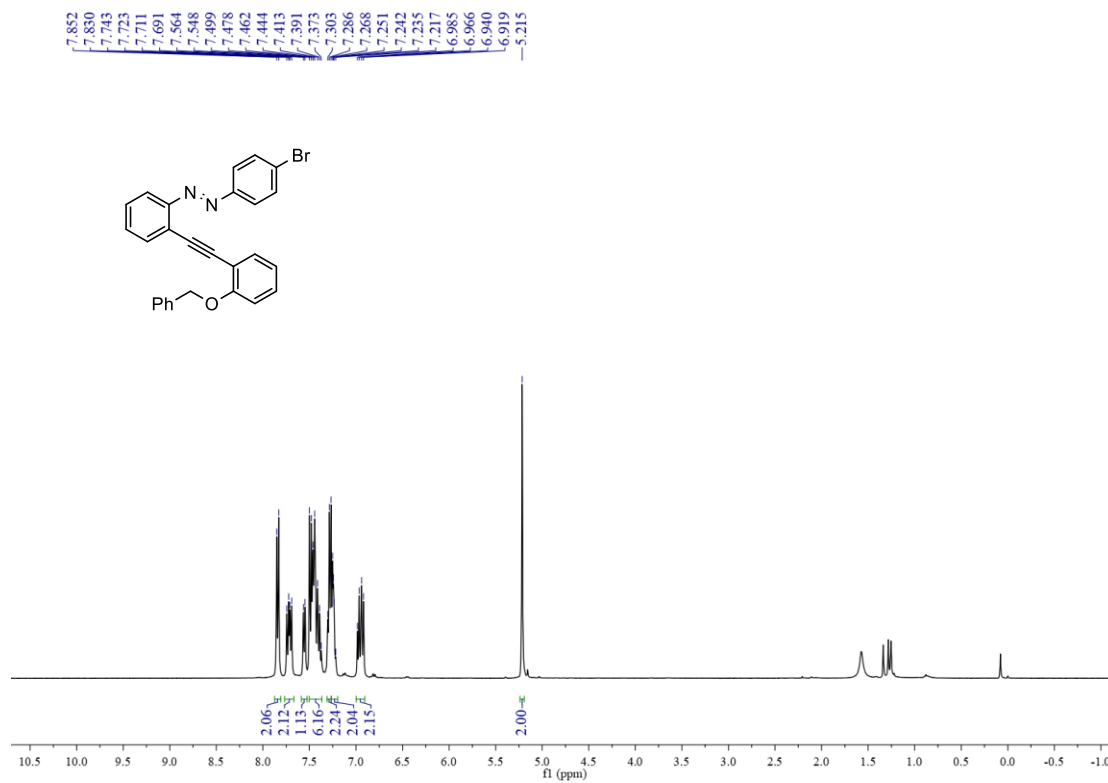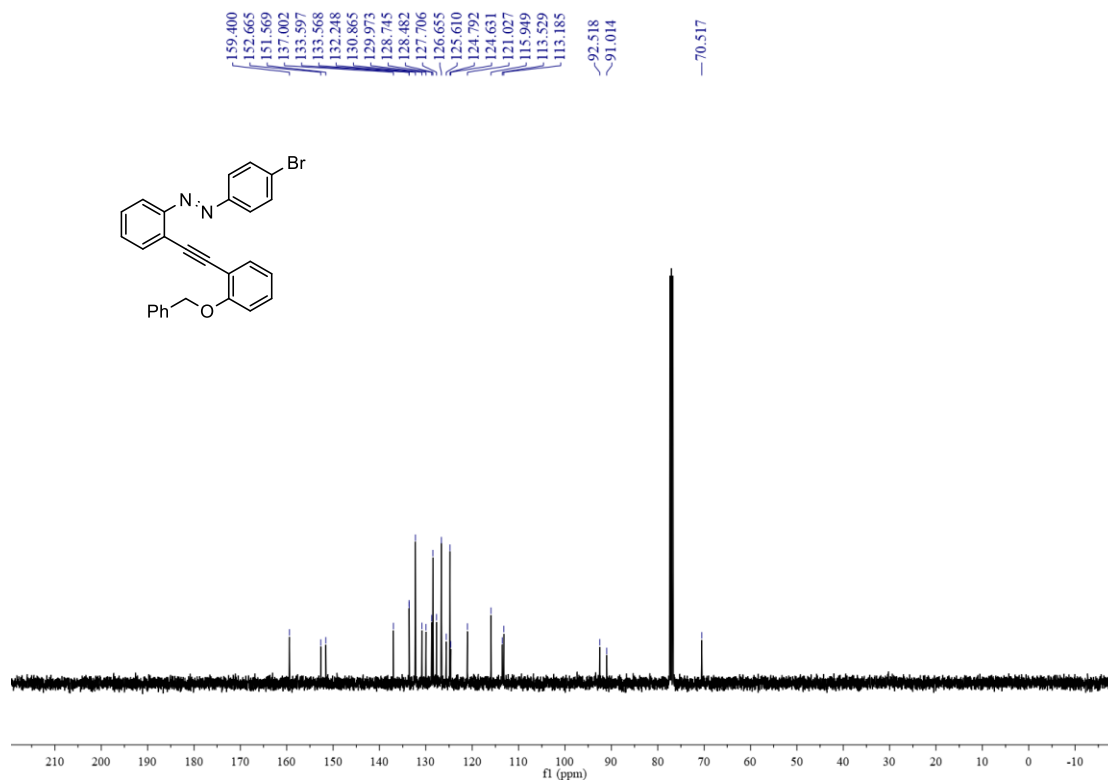

**(E)-1-(4-bromophenyl)-2-(2-((2-((4-methylbenzyl)oxy)phenyl)ethynyl)phenyl)diazene**

**(1b)**

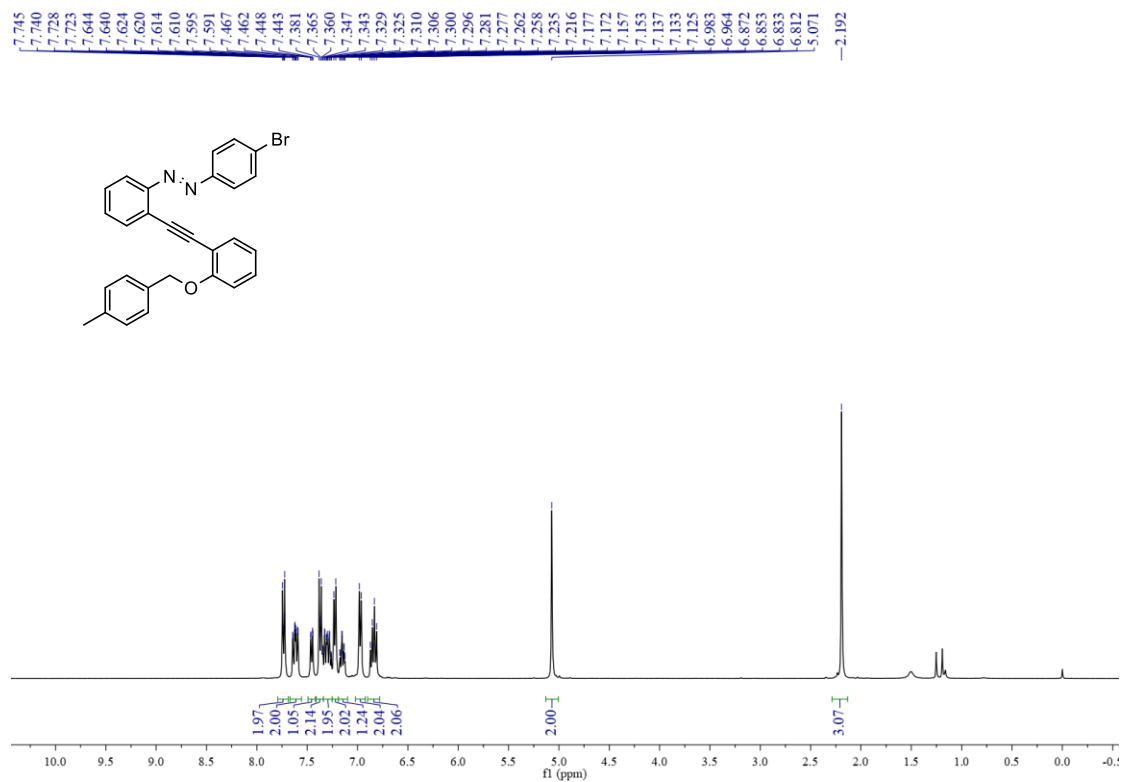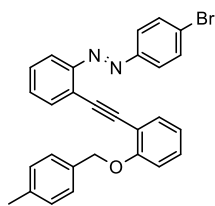

159.499  
152.657  
151.562  
151.360  
133.981  
133.644  
133.602  
132.244  
130.880  
129.987  
129.177  
128.733  
126.732  
125.605  
124.804  
124.734  
120.962  
115.942  
113.538  
113.263  
92.647  
90.996  
70.520  
21.213

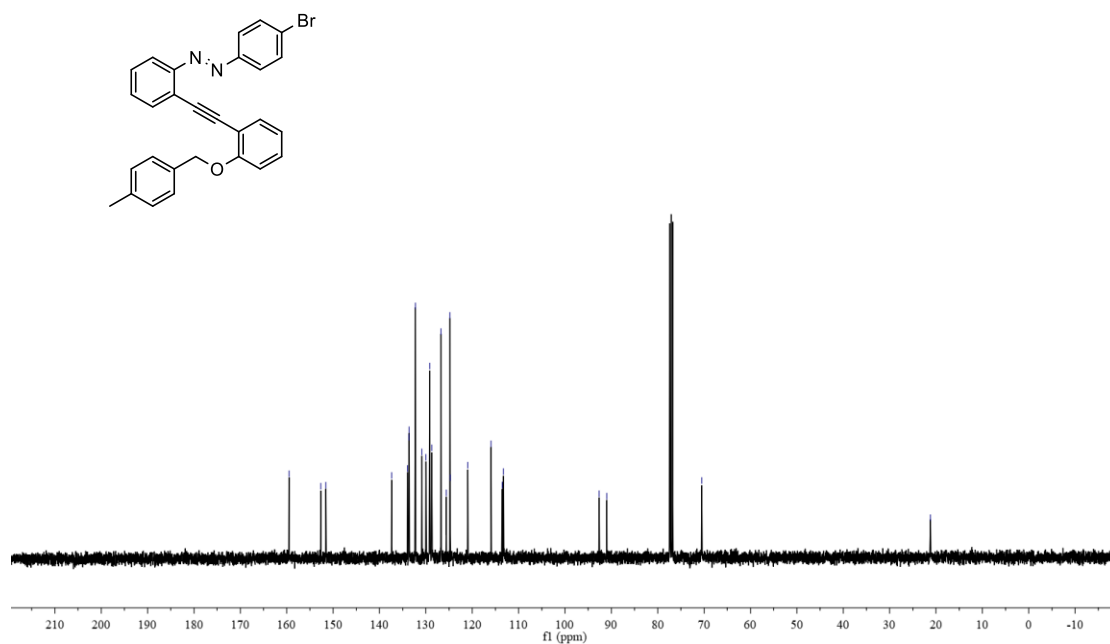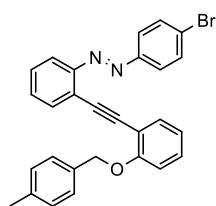

**(E)-1-(4-bromophenyl)-2-(2-((4-methoxybenzyl)oxy)phenyl)ethynylphenyl)diazene (1c)**

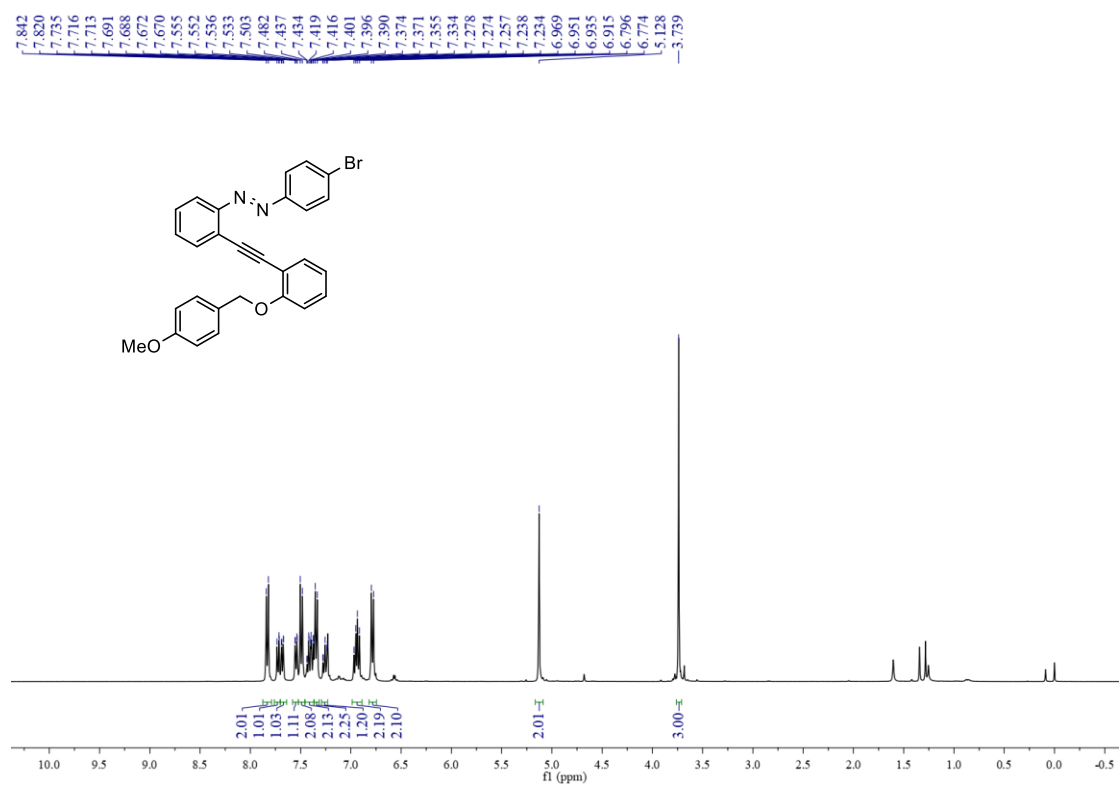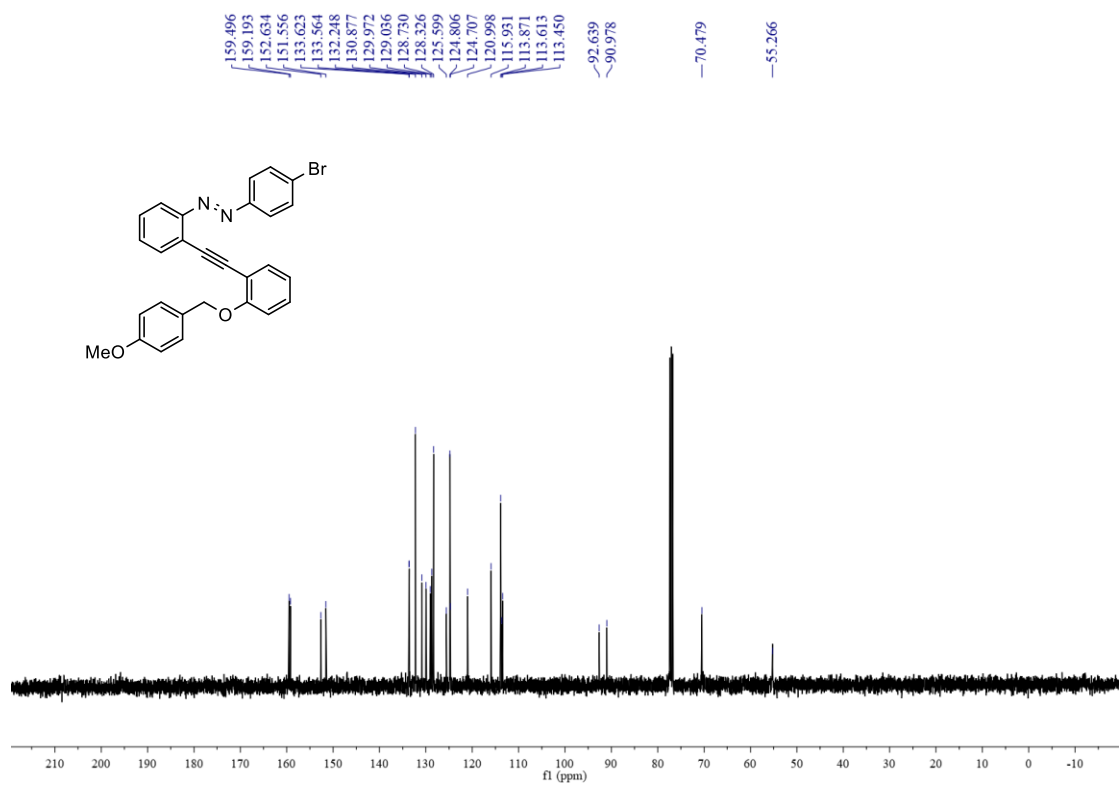

**(E)-1-(4-bromophenyl)-2-(2-((4-fluorobenzyl)oxy)phenyl)ethynyl)phenyl)diazene (1d)**

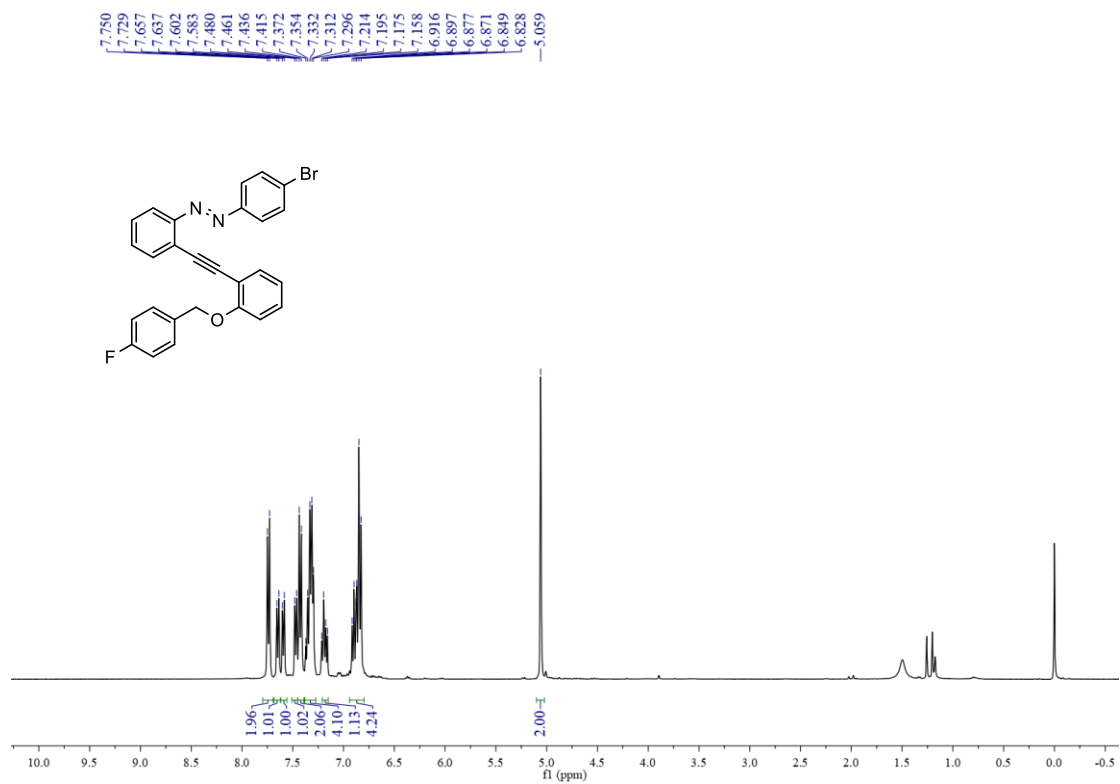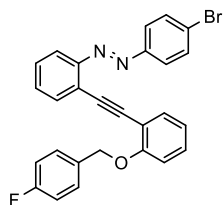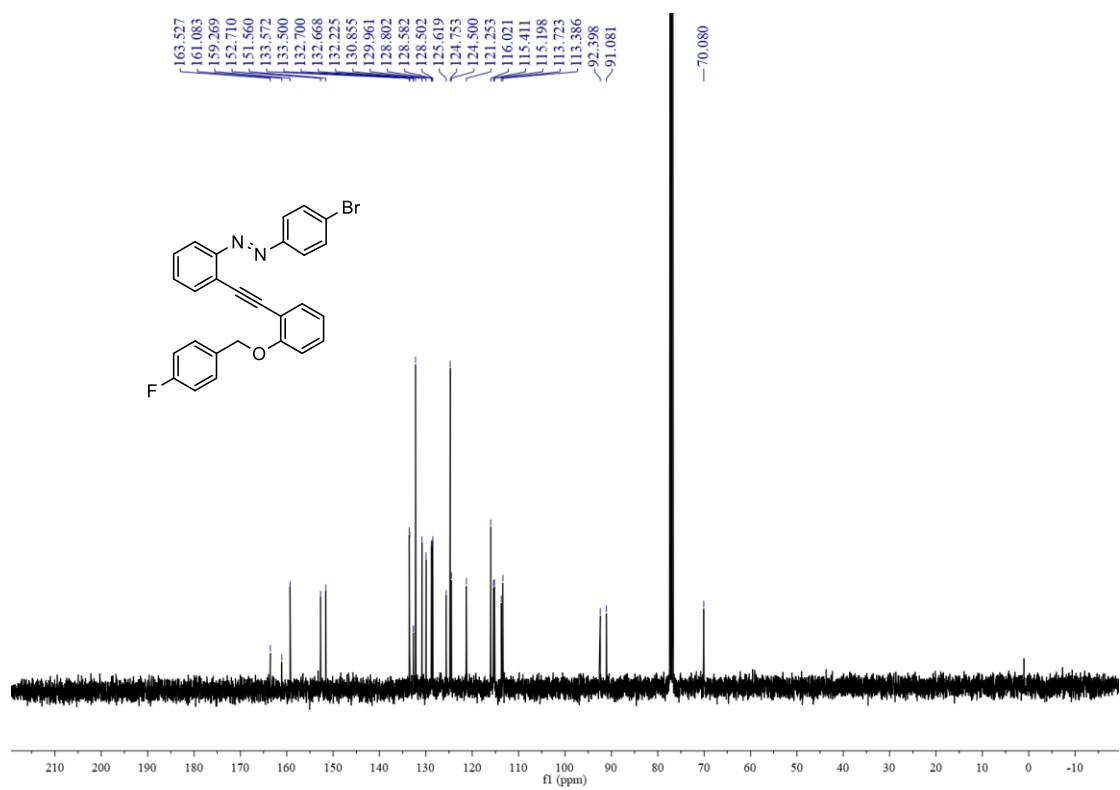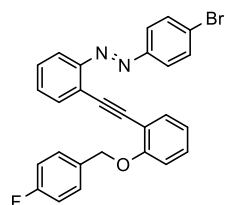

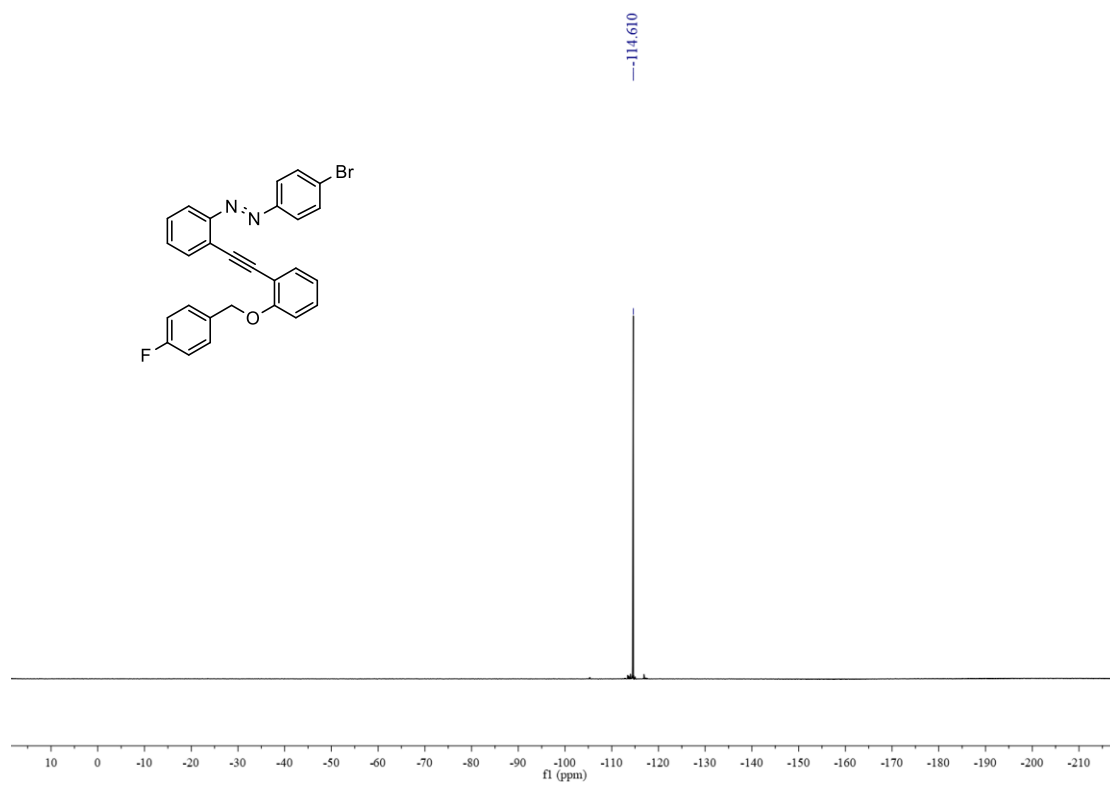

**(E)-1-(4-bromophenyl)-2-((2-((4-chlorobenzyl)oxy)phenyl)ethynyl)phenyl)diazene (1e)**

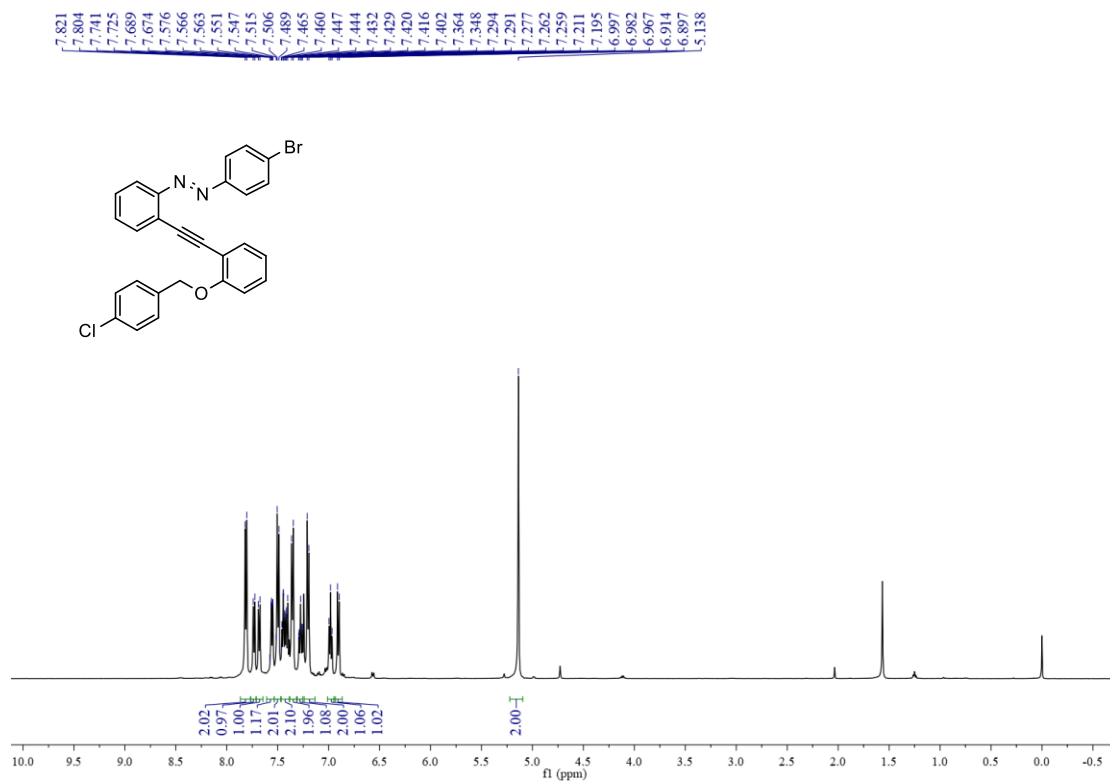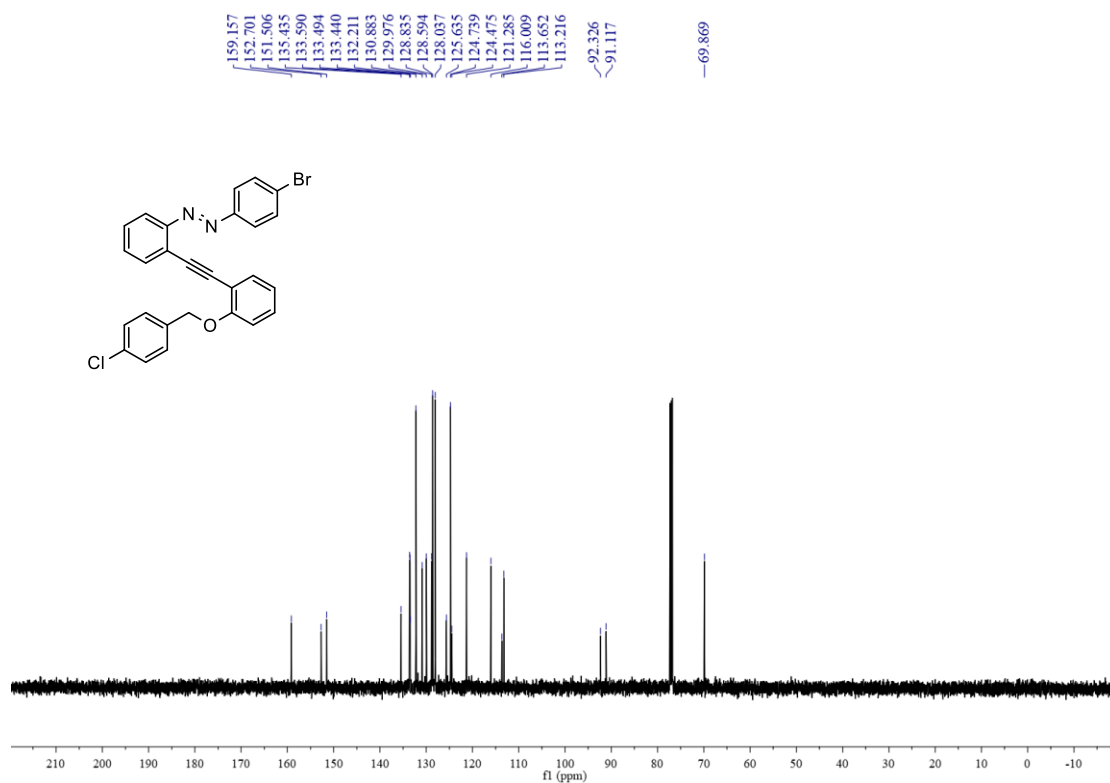

*(E)*-1-(2-((2-(4-bromobenzyl)oxy)phenyl)ethynyl)phenyl)-2-(4-bromophenyl)diazene (*1f*)

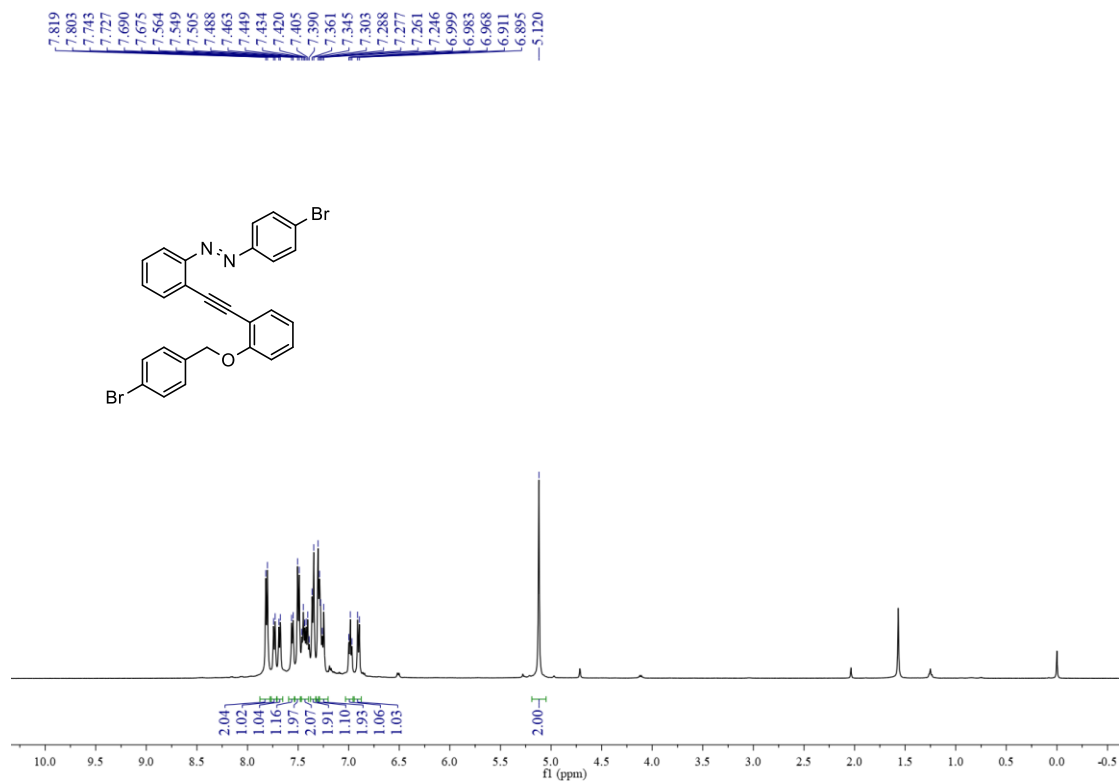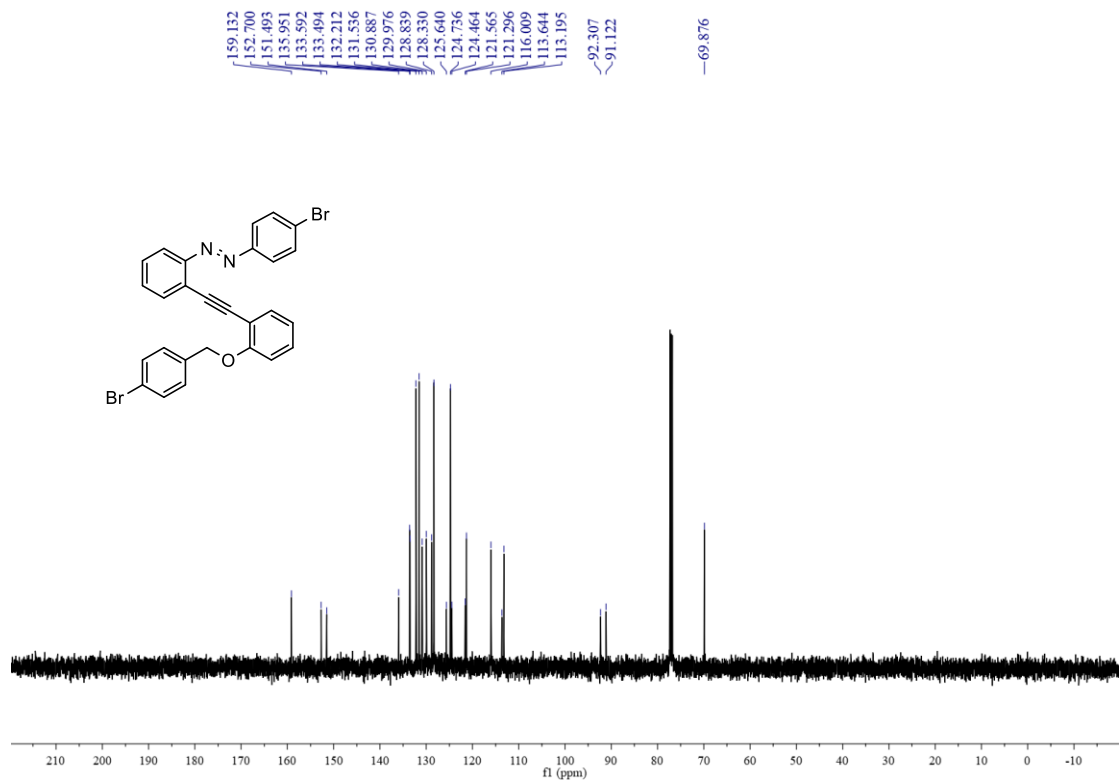



**(E)-1-(4-bromophenyl)-2-(2-((4-(trifluoromethyl)benzyl)oxy)phenyl)ethynyl)phenyl)diazene (1g)**

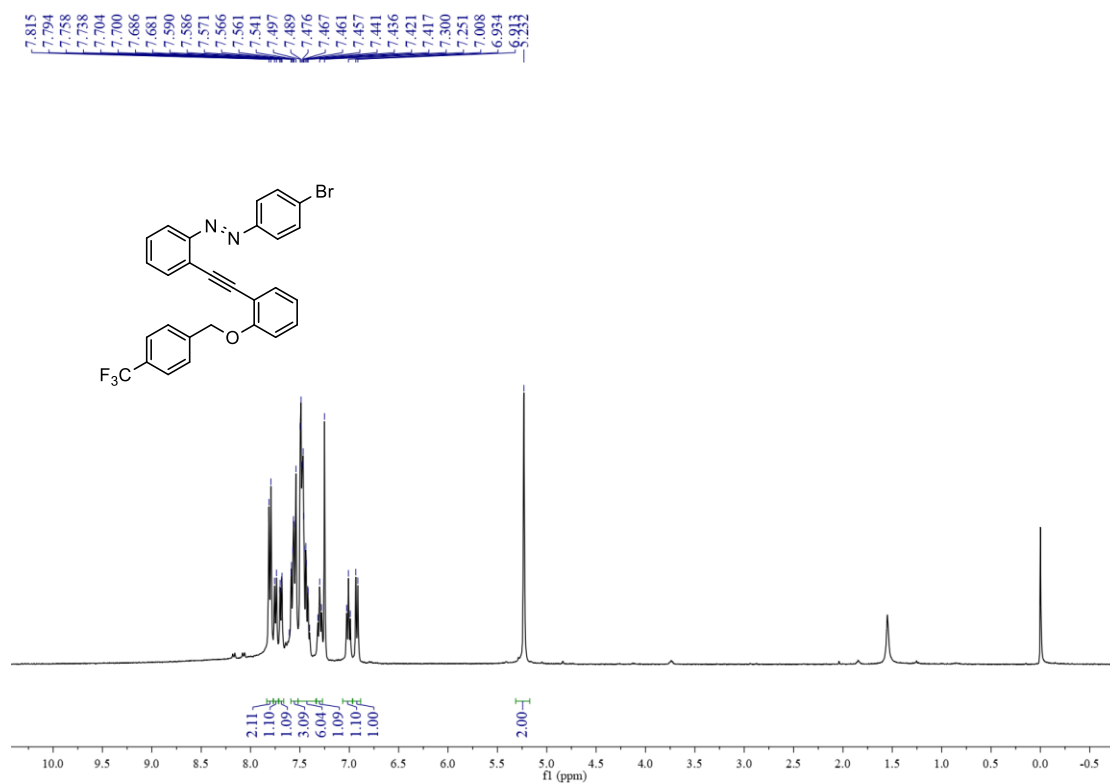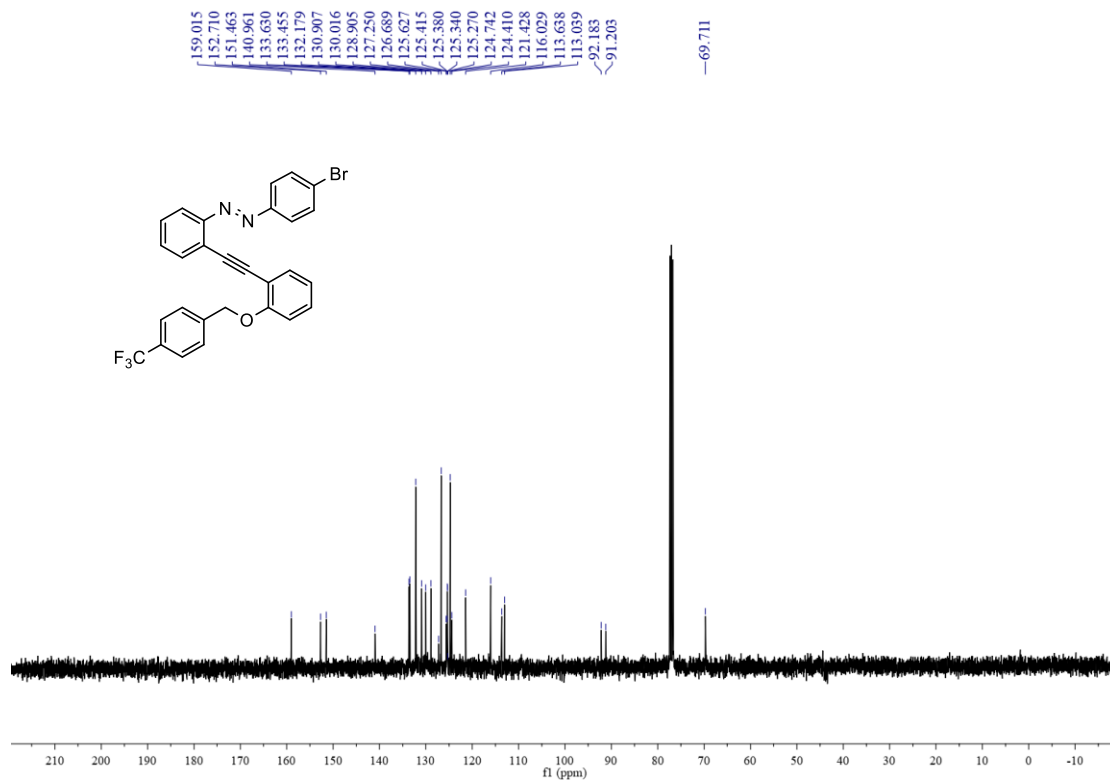

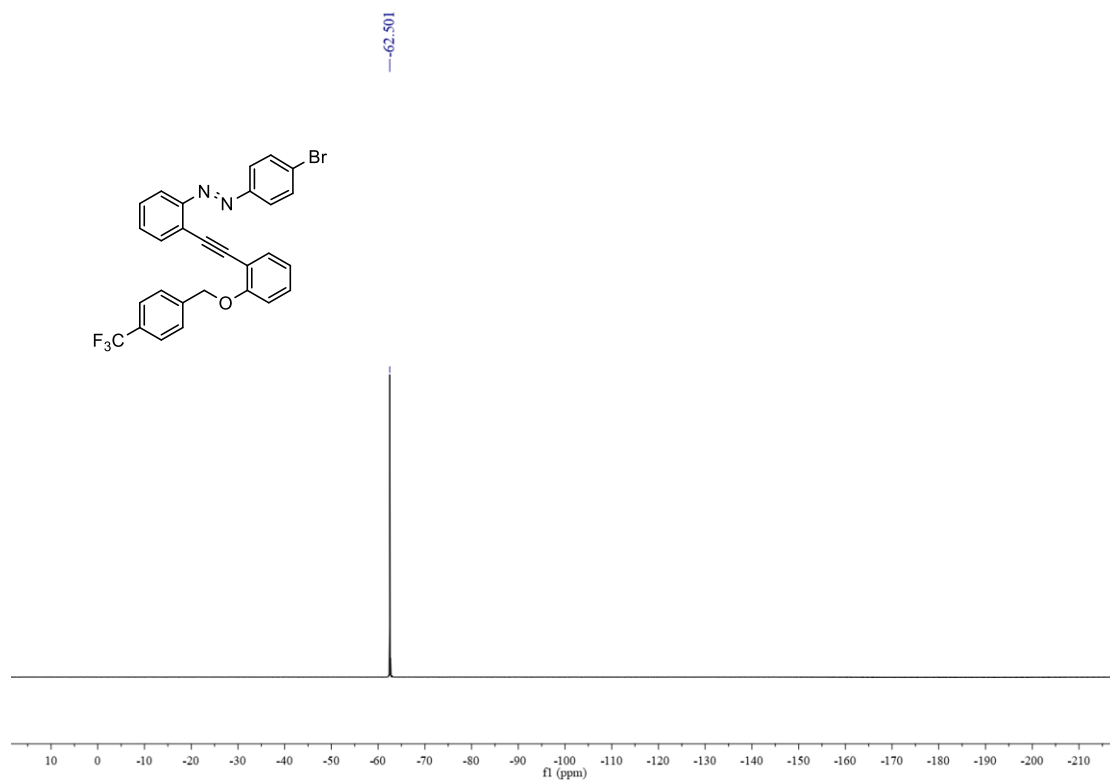

**(E)-4-((2-((4-bromophenyl)diazenyl)phenyl)ethynyl)phenoxy)methylbenzonitrile (1h)**

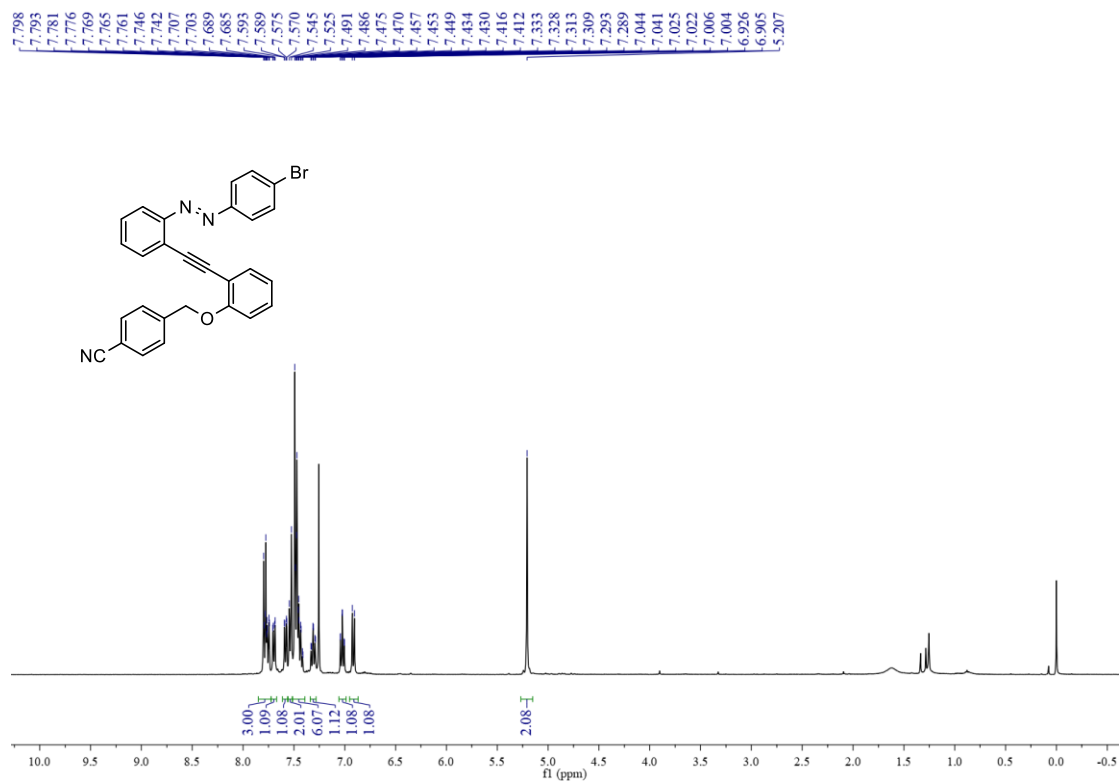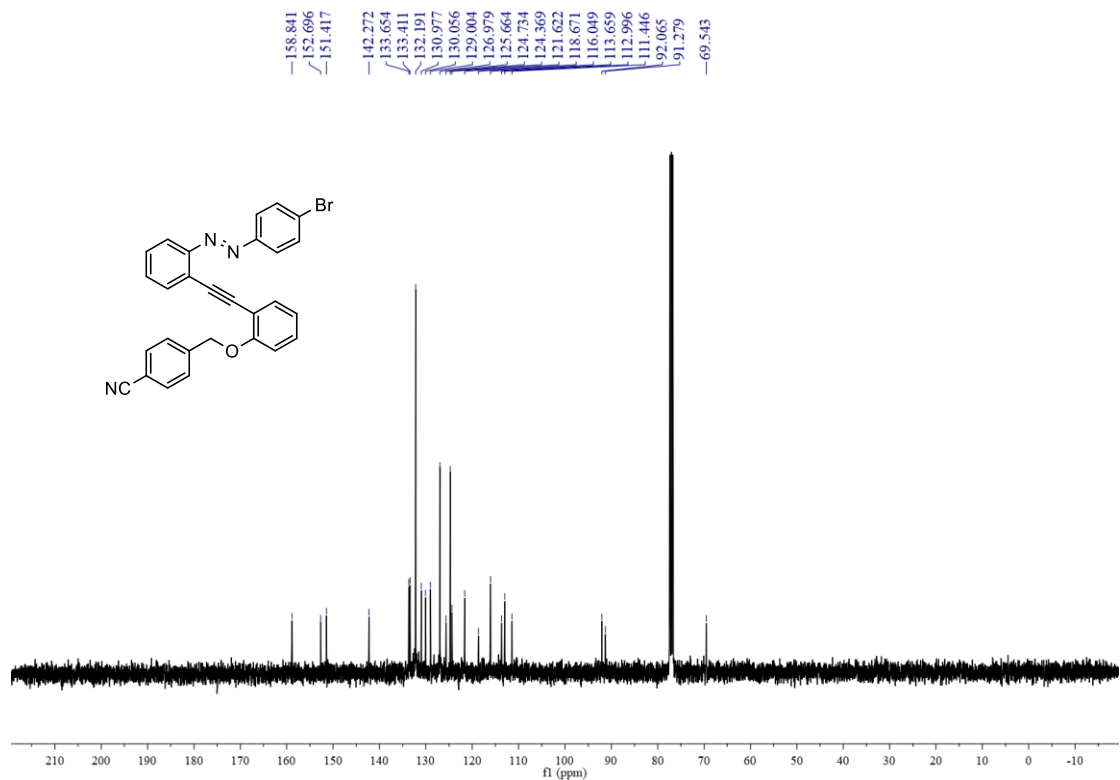

*(E)*-1-(2-((2-((3-bromobenzyl)oxy)phenyl)ethynyl)phenyl)-2-(4-bromophenyl)diazene (*1i*)

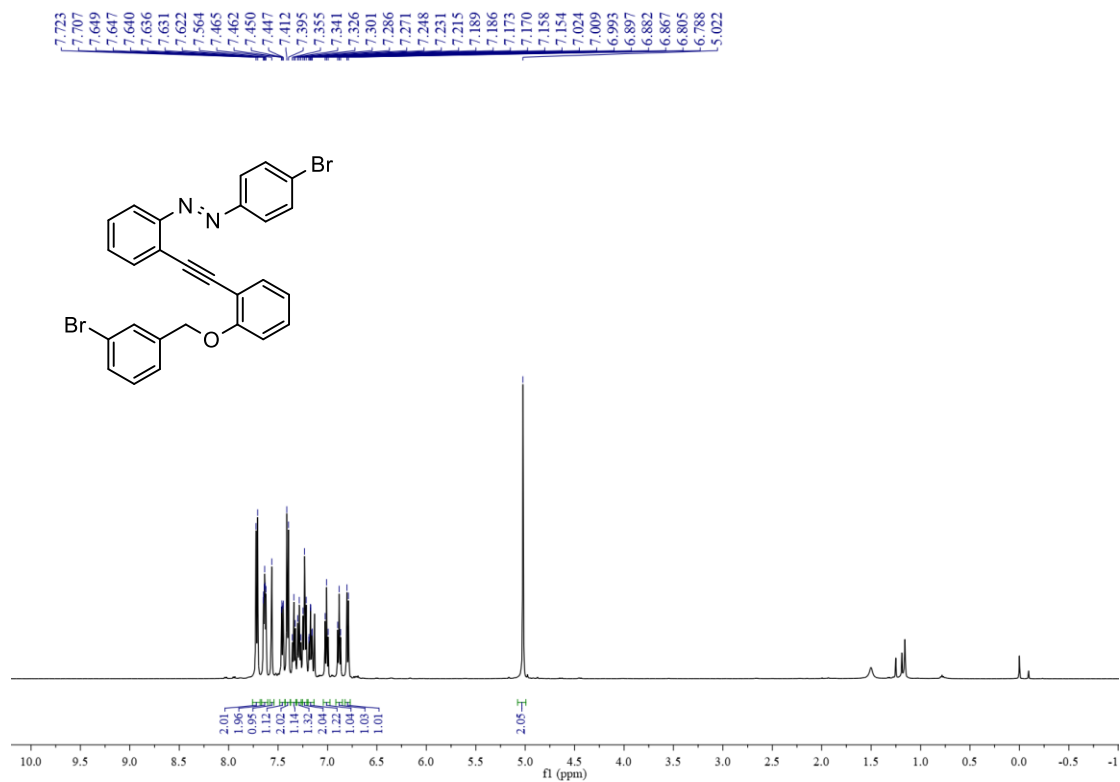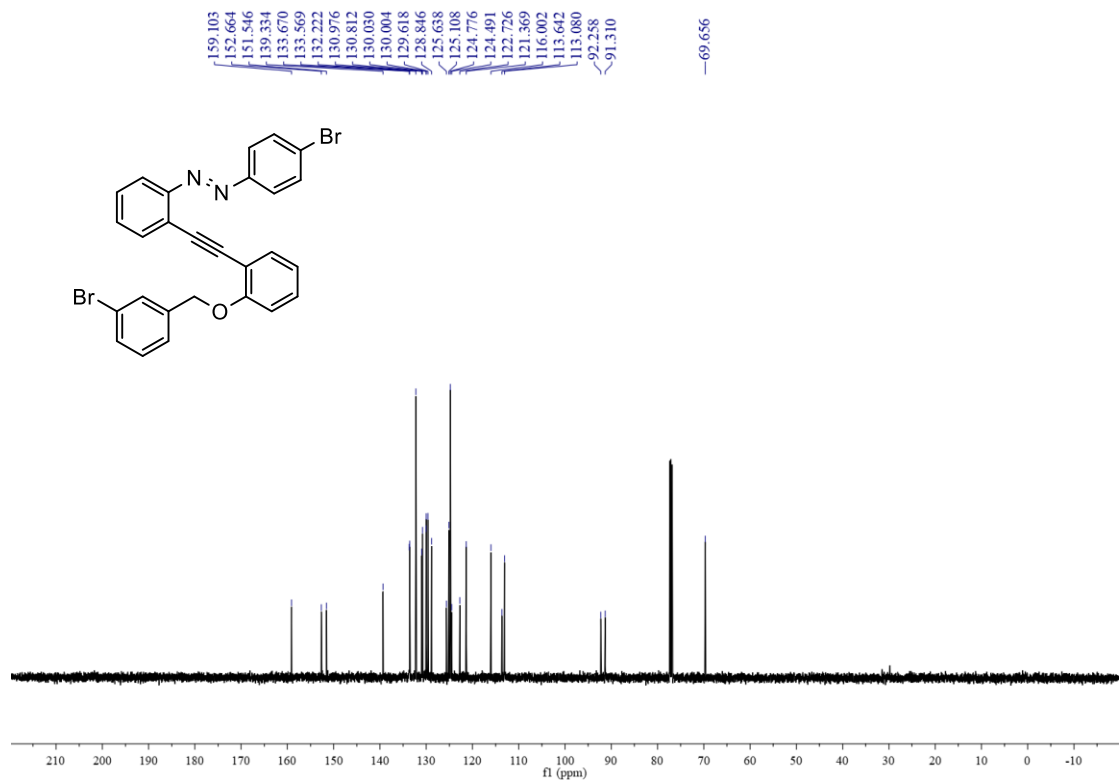

*(E)*-1-(2-((2-((2-bromobenzyl)oxy)phenyl)ethynyl)phenyl)-2-(4-bromophenyl)diazene (*1j*)

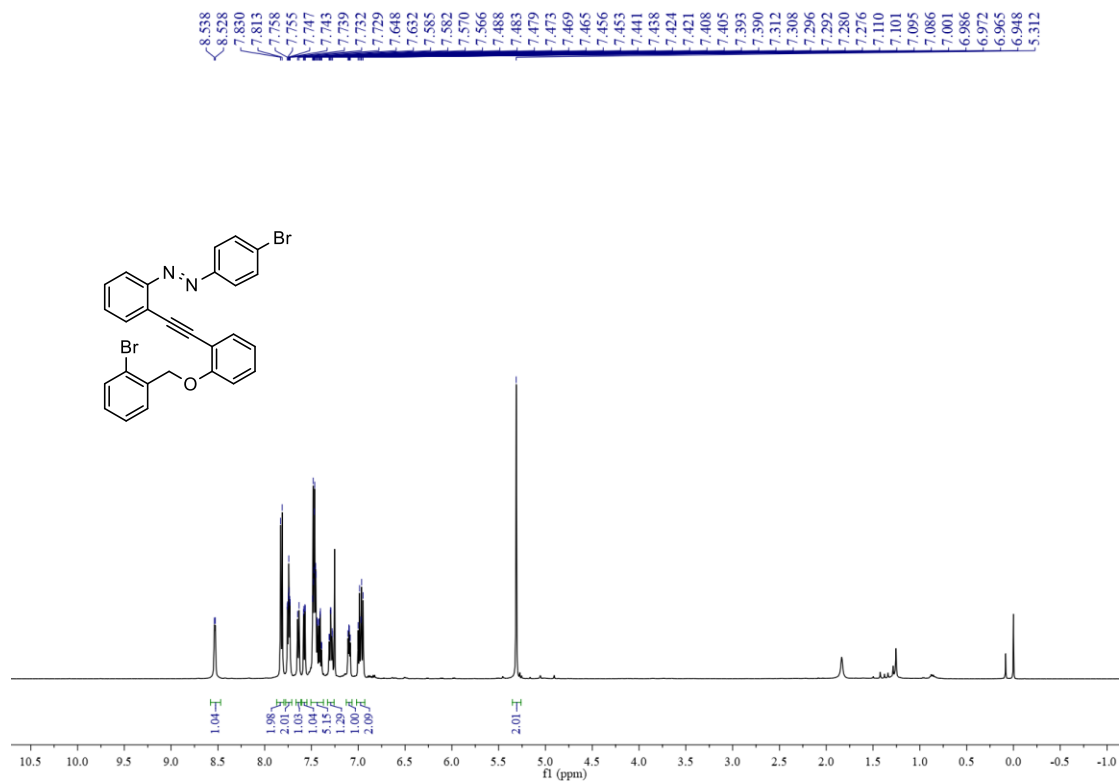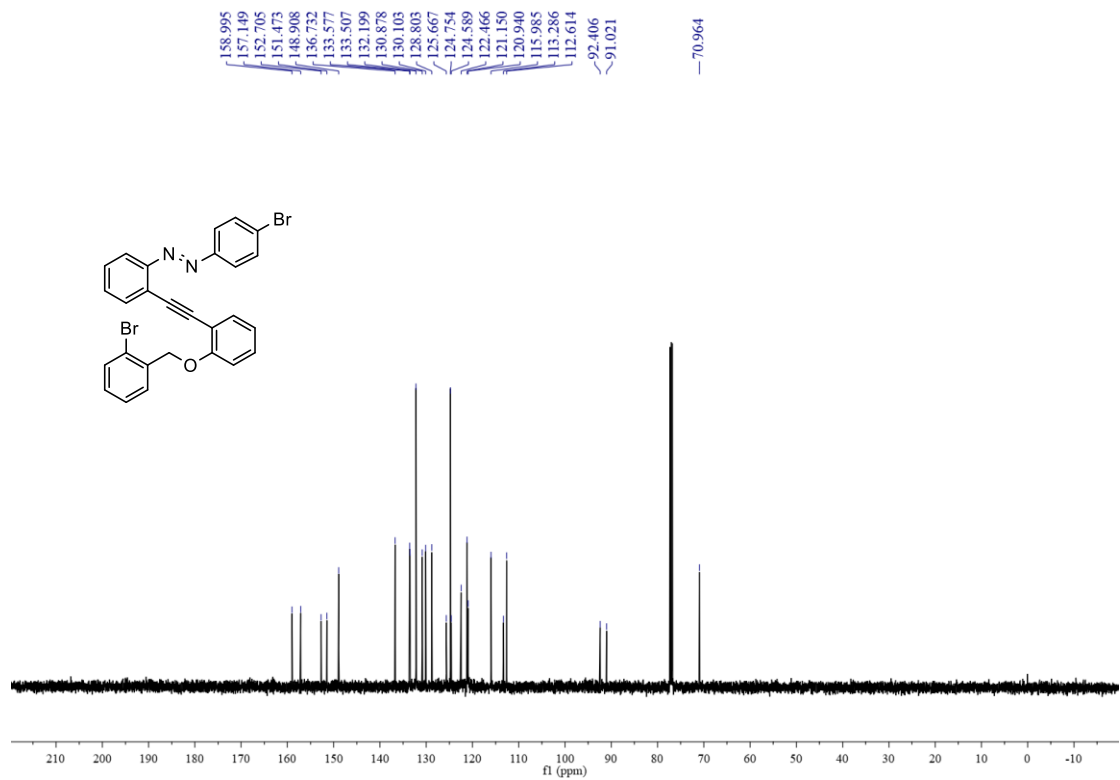

**(E)-1-(4-bromophenyl)-2-(2-((2-methoxybenzyl)oxy)phenyl)ethynyl)phenyl)diazene (1k)**

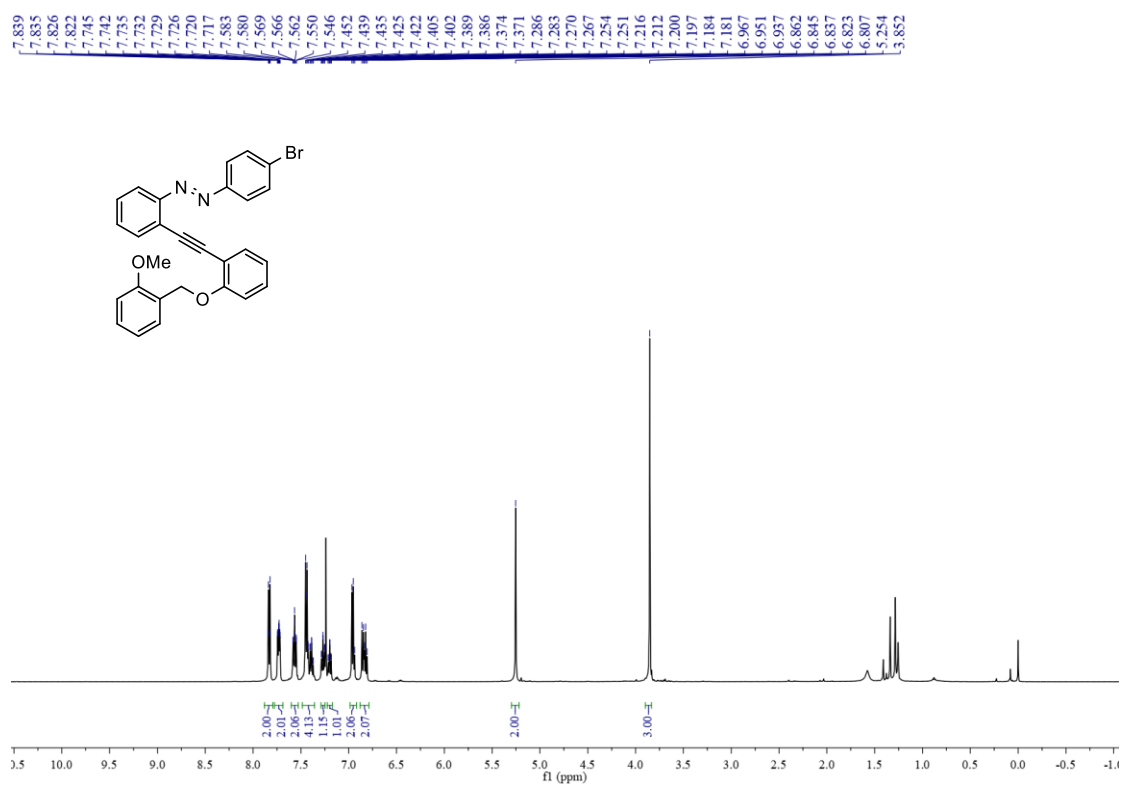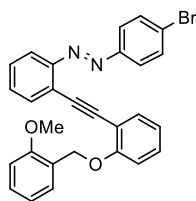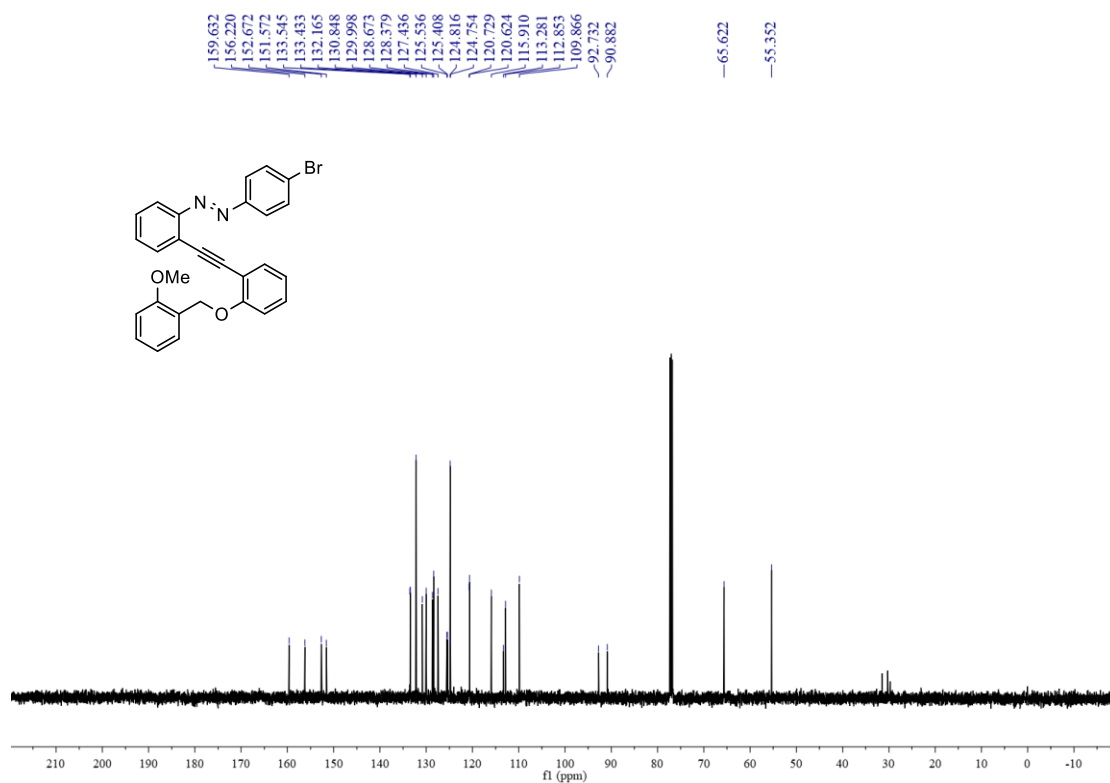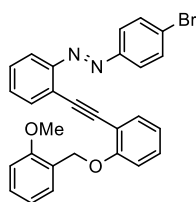

**(E)-1-(4-bromophenyl)-2-(2-((2-(naphthalen-1-ylmethoxy)phenyl)ethynyl)phenyl)diazene (11)**

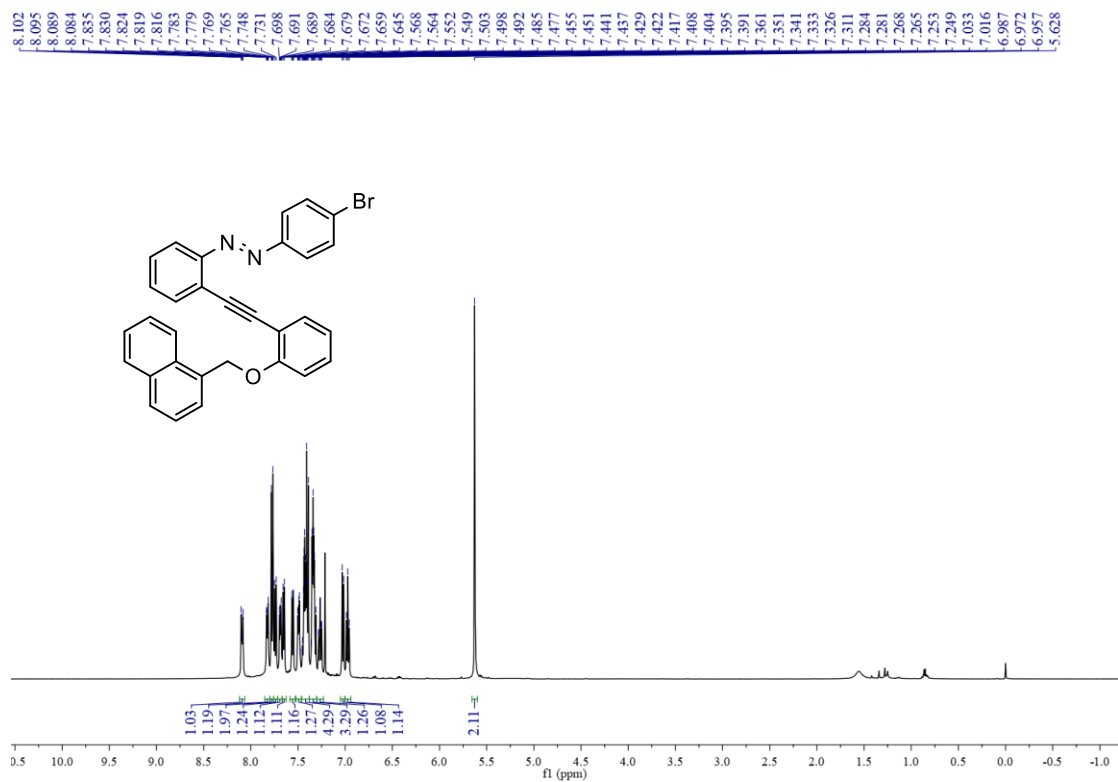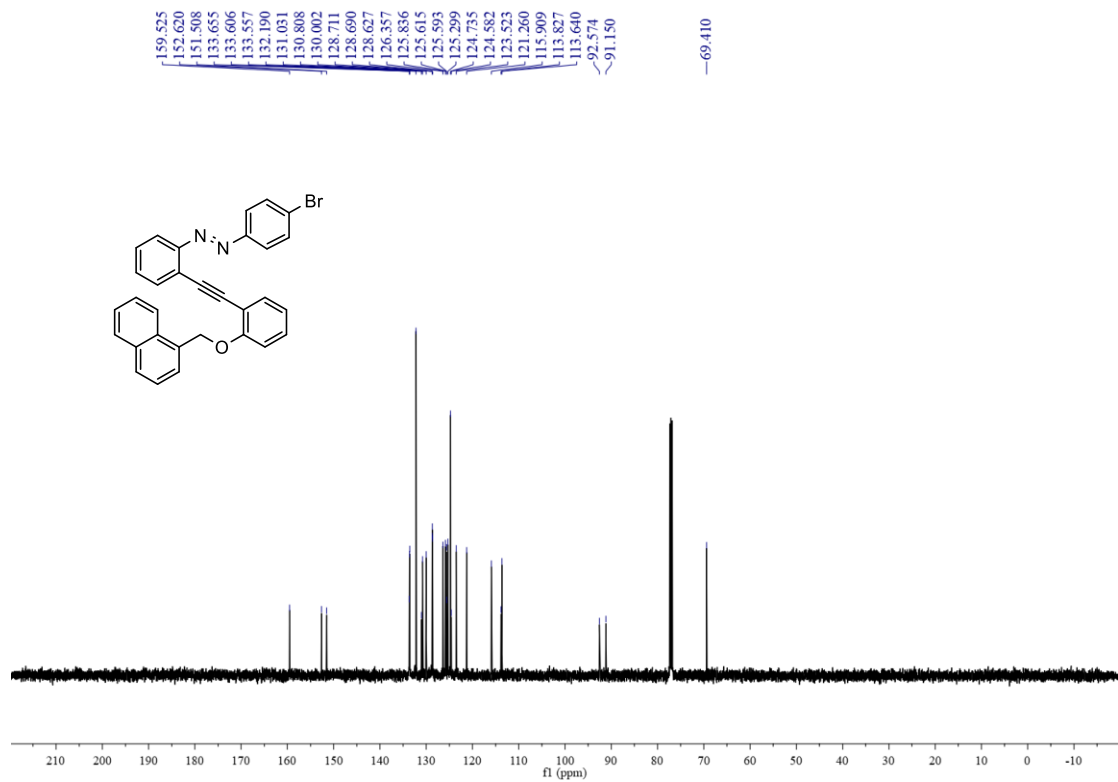

**(E)-1-(4-bromophenyl)-2-(2-((2-(naphthalen-2-ylmethoxy)phenyl)ethynyl)phenyl)diazene (1m)**

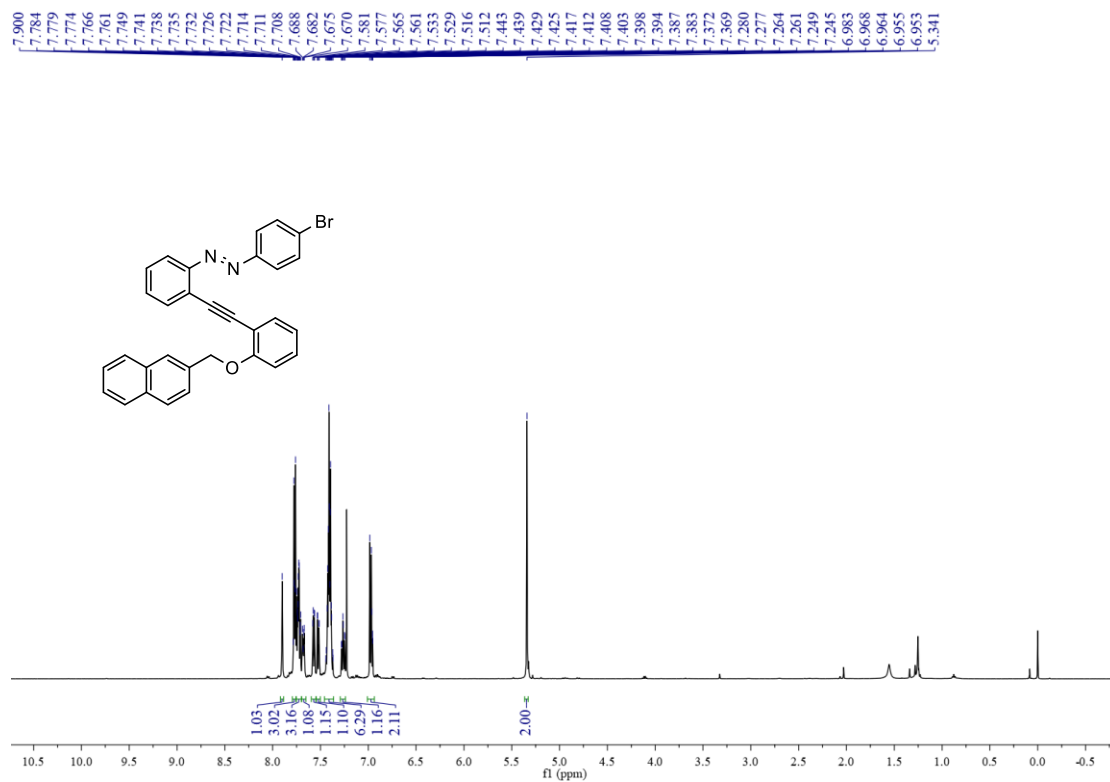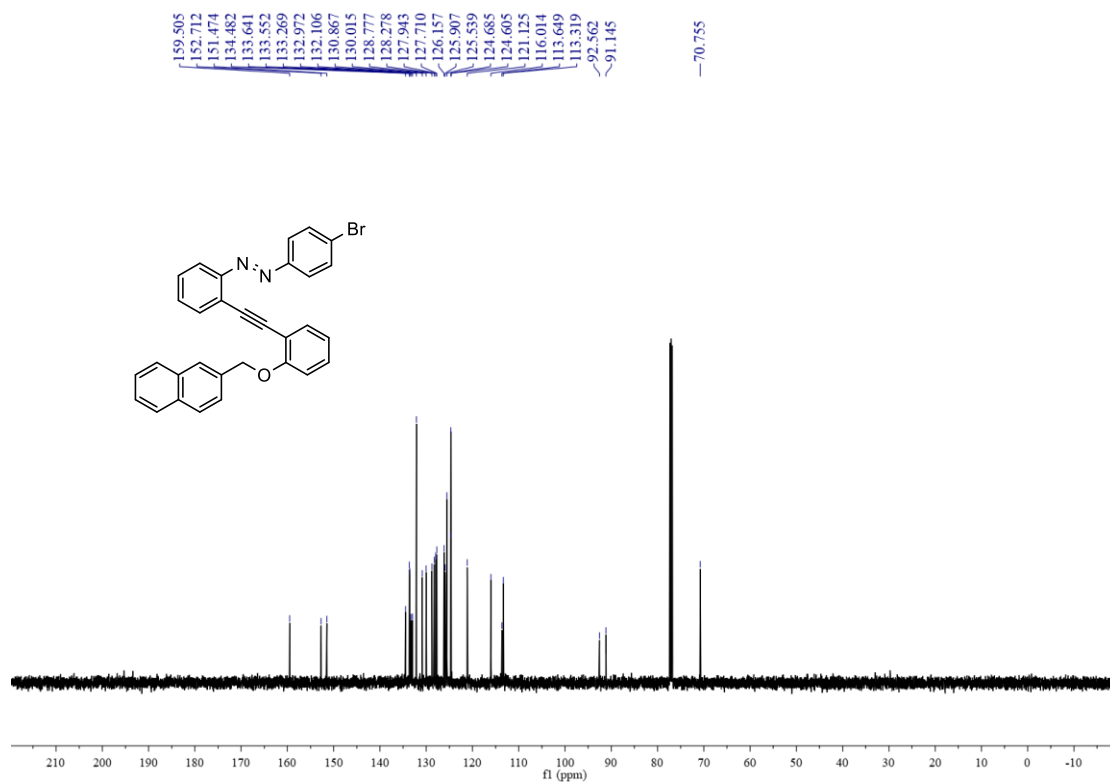



**(E)-1-(2-((2-allyloxy)phenyl)ethynyl)phenyl-2-(4-bromophenyl)diazene (1n)**

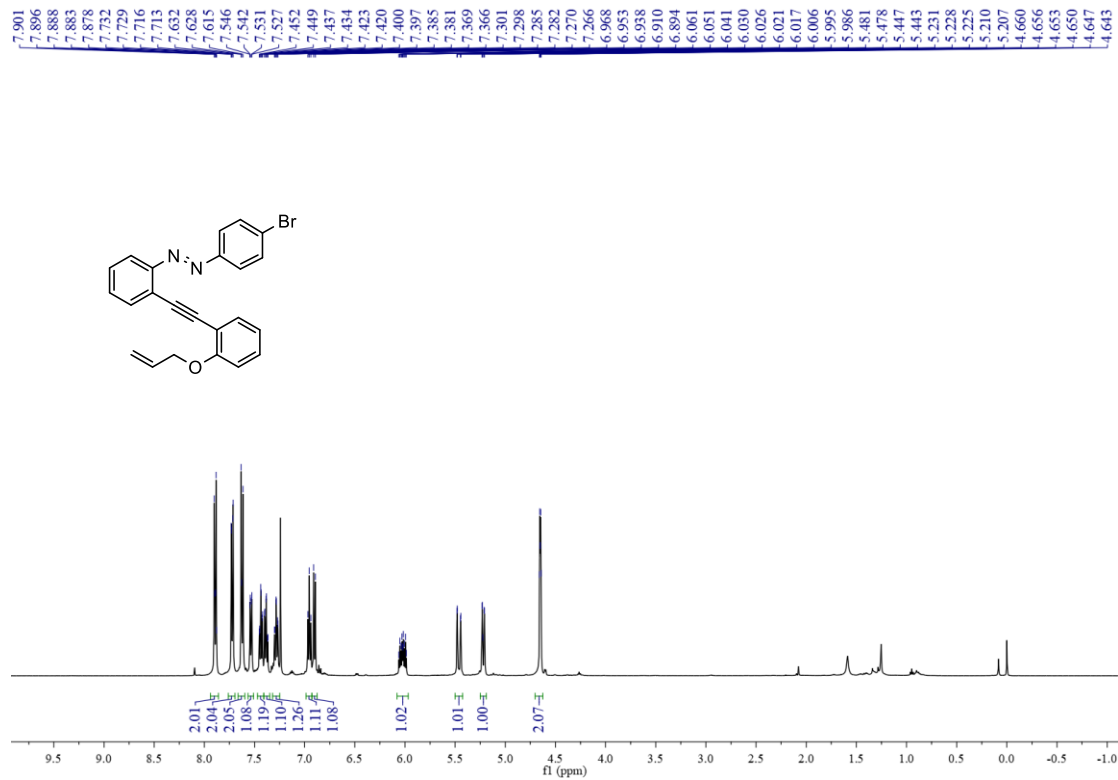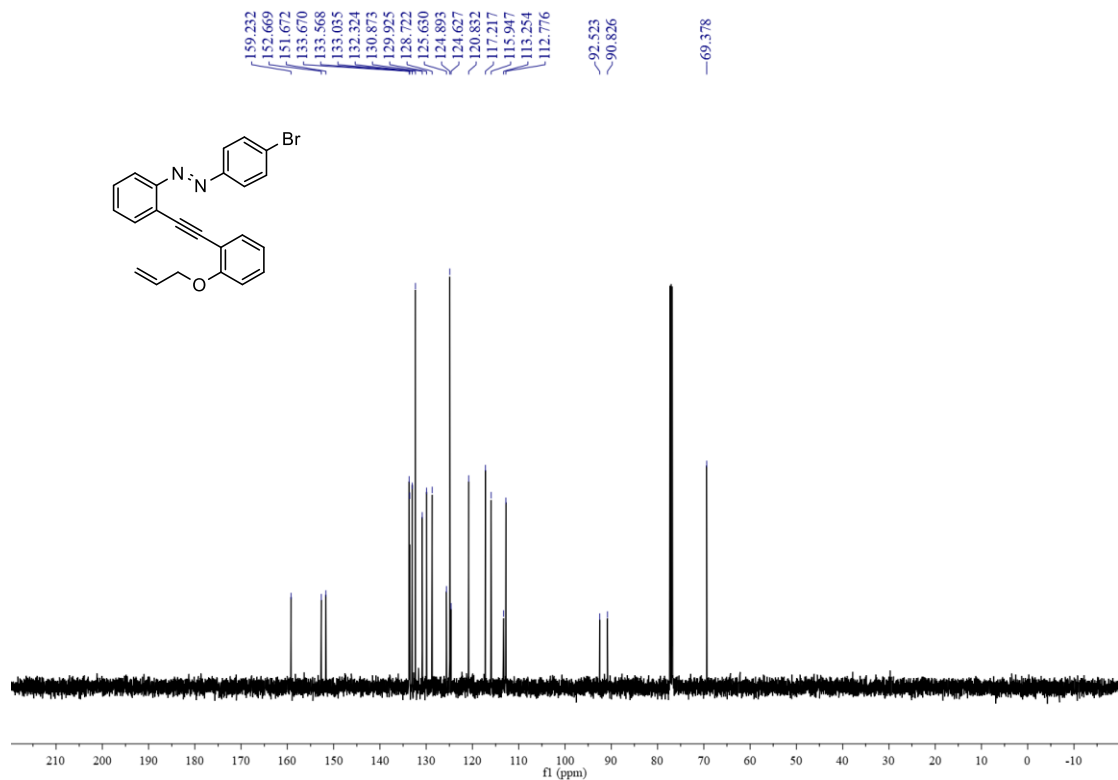

**(E)-1-(4-bromophenyl)-2-((2-(but-2-yn-1-yloxy)phenyl)ethynyl)phenyl)diazene (1o)**

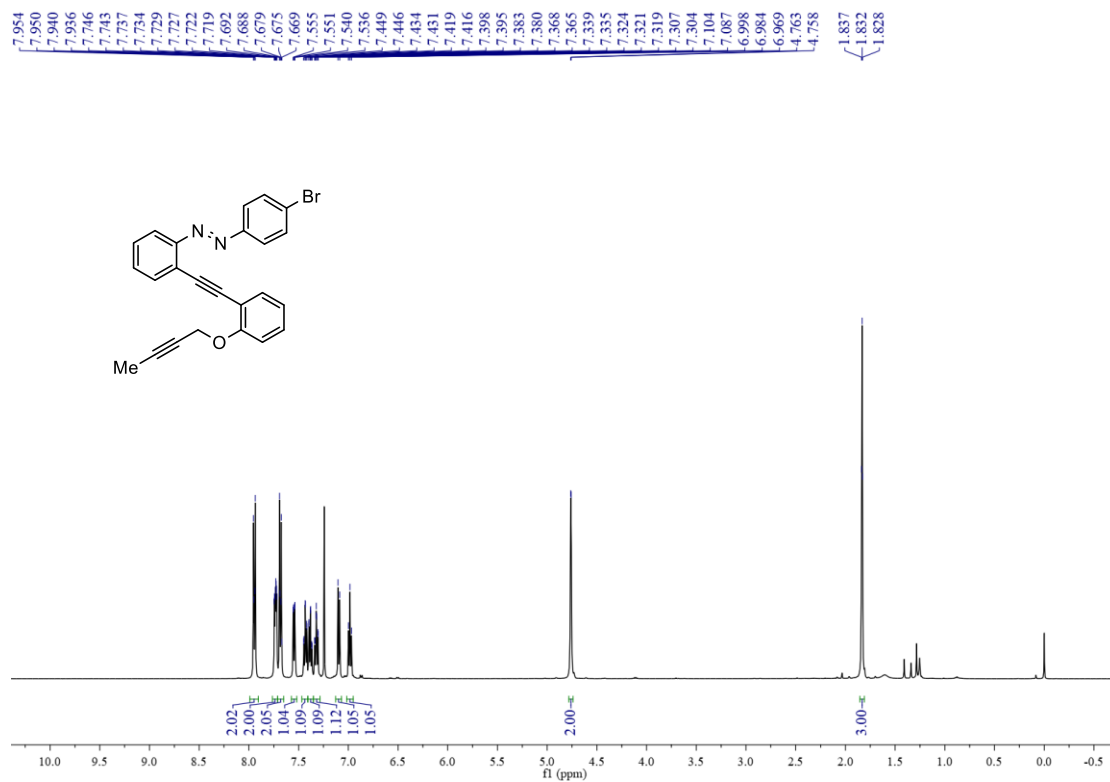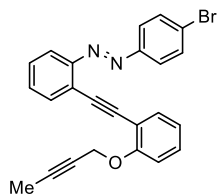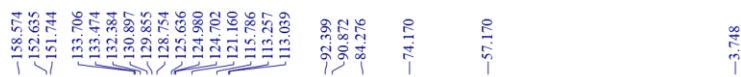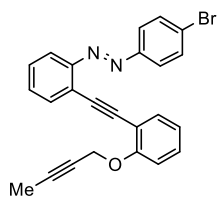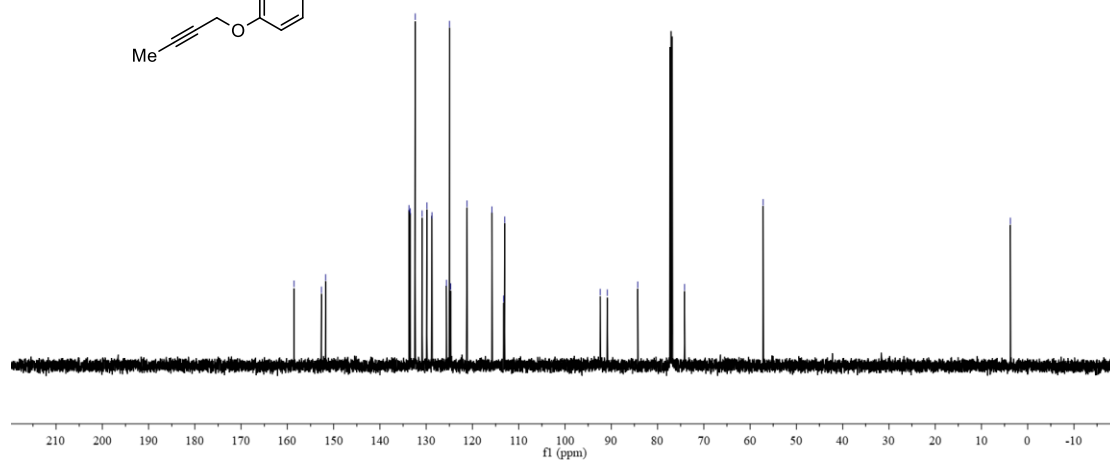

**(E)-1-(4-bromophenyl)-2-(2-((2-((3-(trimethylsilyl)prop-2-yn-1-yl)oxy)phenyl)ethynyl)phenyl)-diazene (1p)**

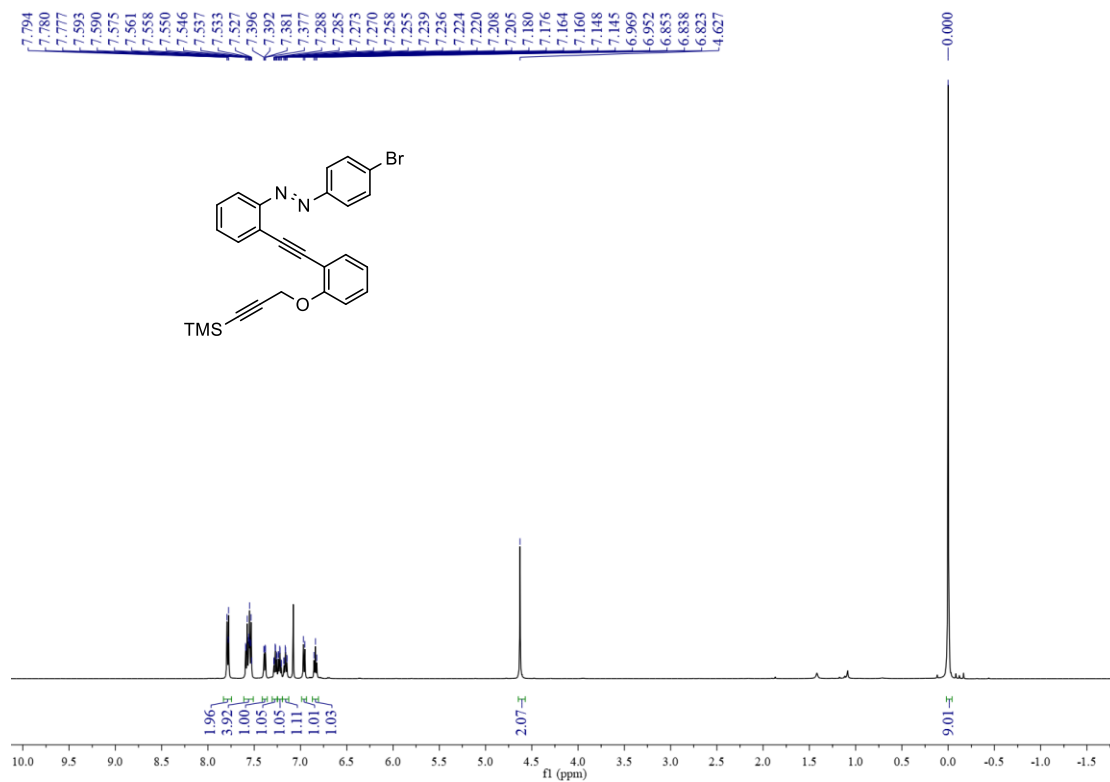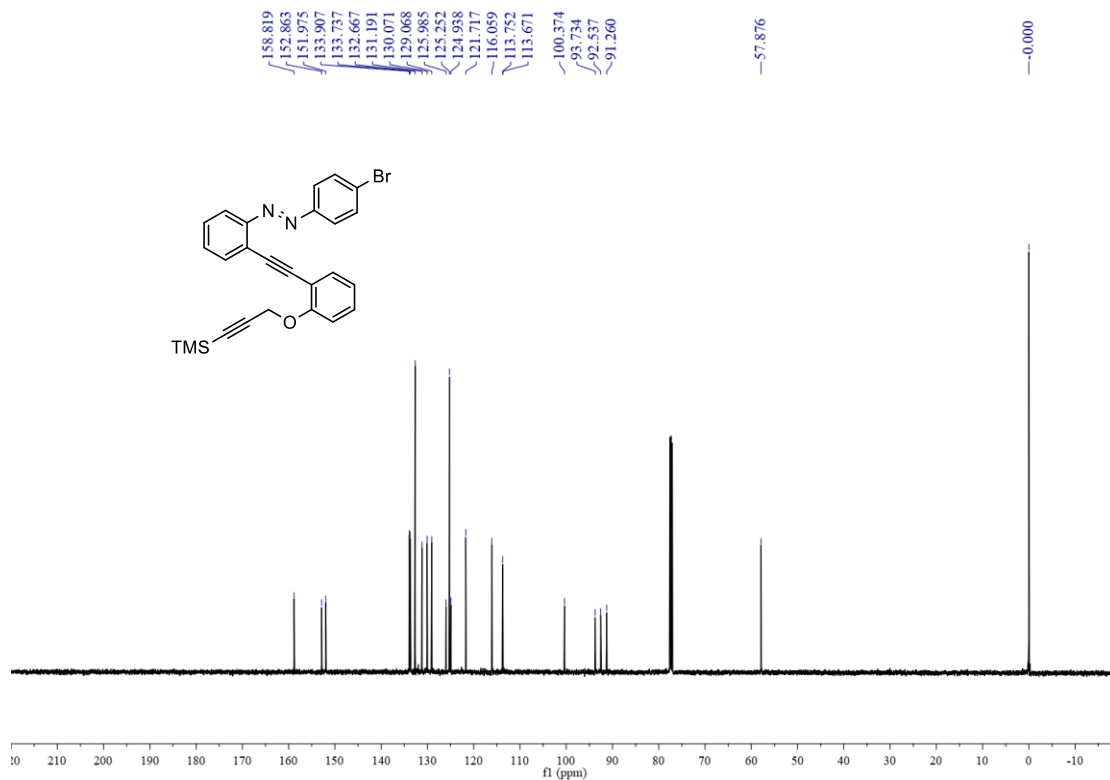

**(E)-1-(4-bromophenyl)-2-((2-((3-phenylpropoxy)phenyl)ethynyl)phenyl)diazene (1q)**

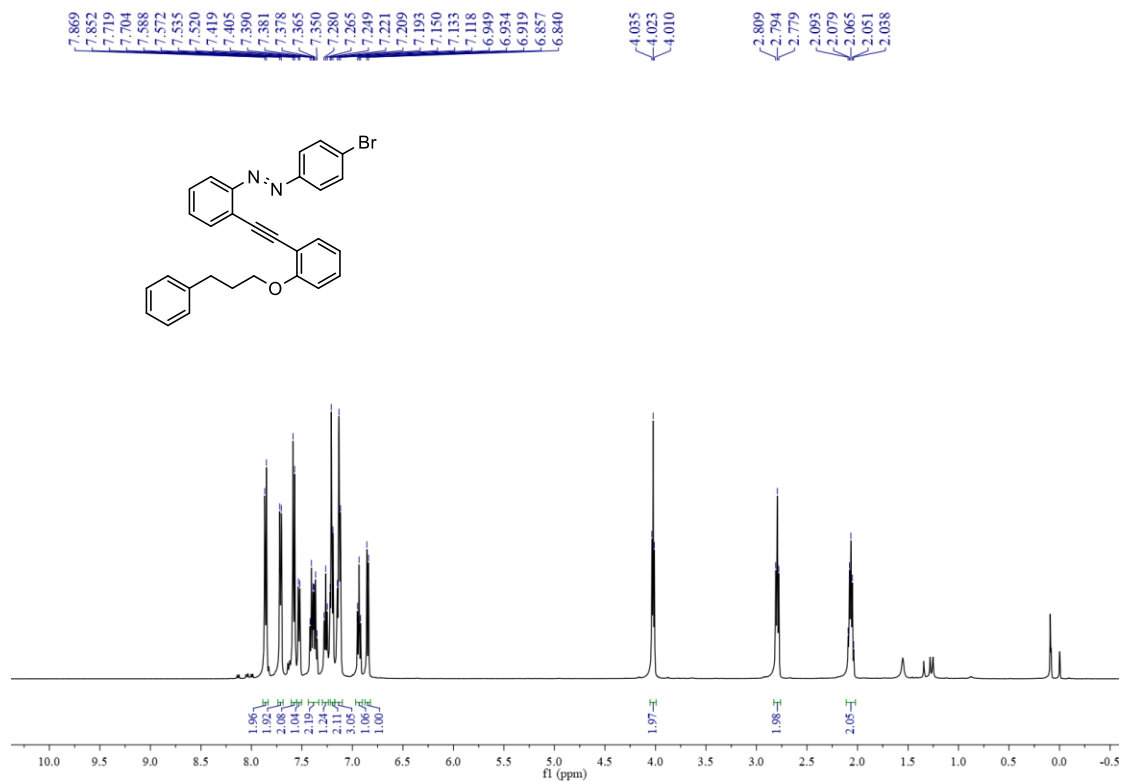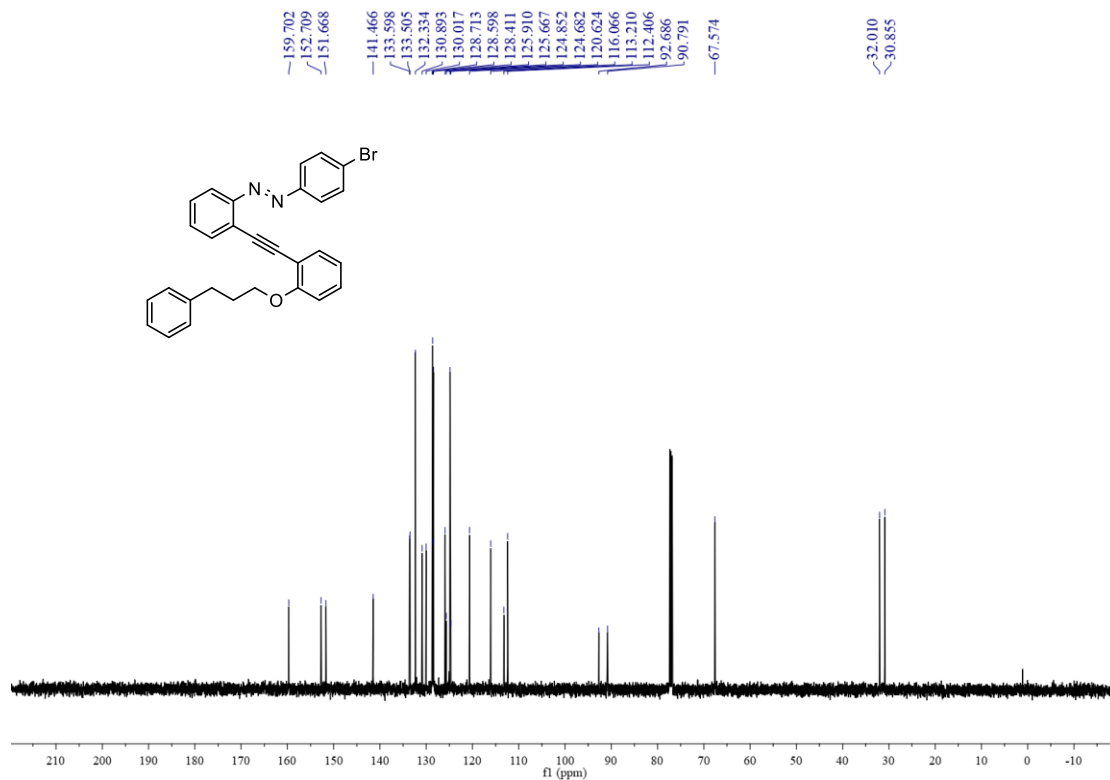

**(E)-1-(4-bromophenyl)-2-(2-((2-isopentyloxy)phenyl)ethynyl)phenyl)diazene (1r)**

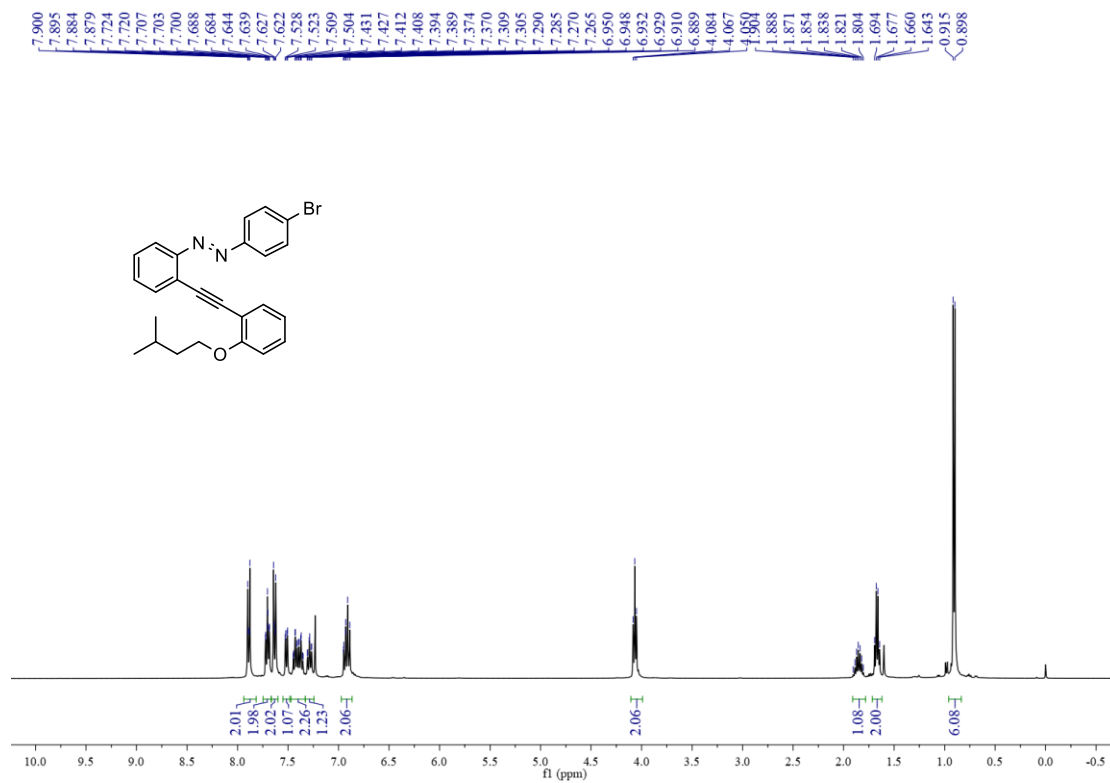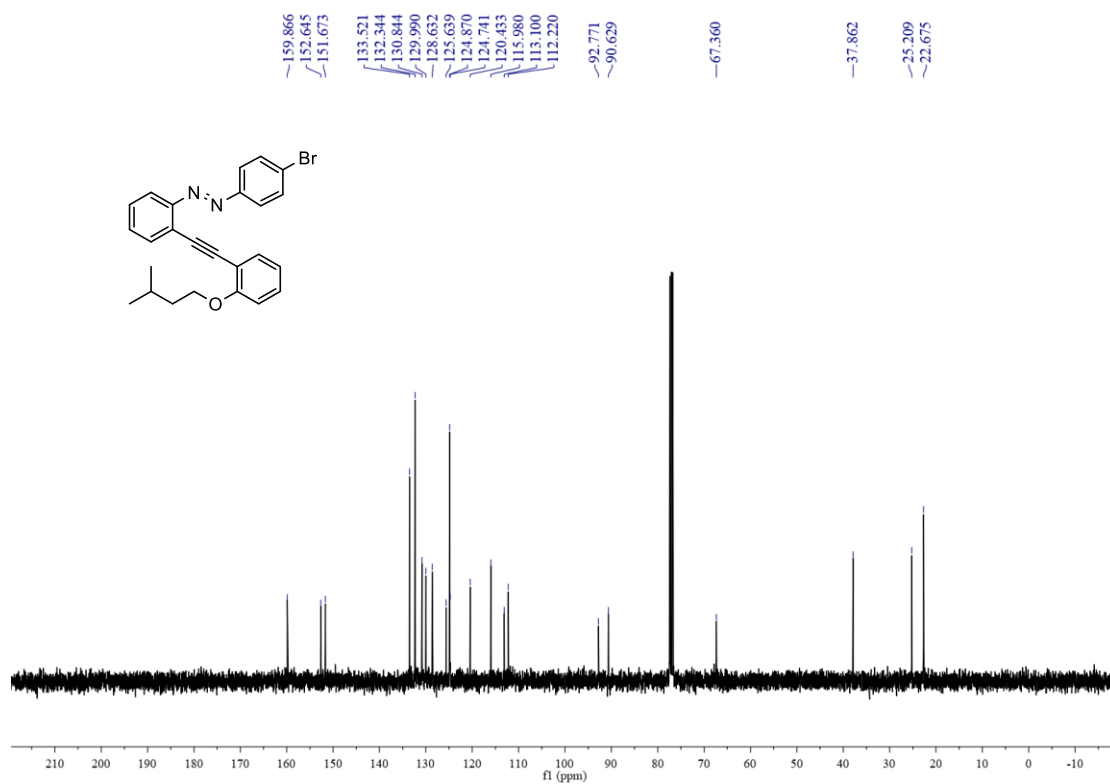

**(E)-1-(4-bromophenyl)-2-(2-((2-isobutoxyphenyl)ethynyl)phenyl)diazene (1s)**

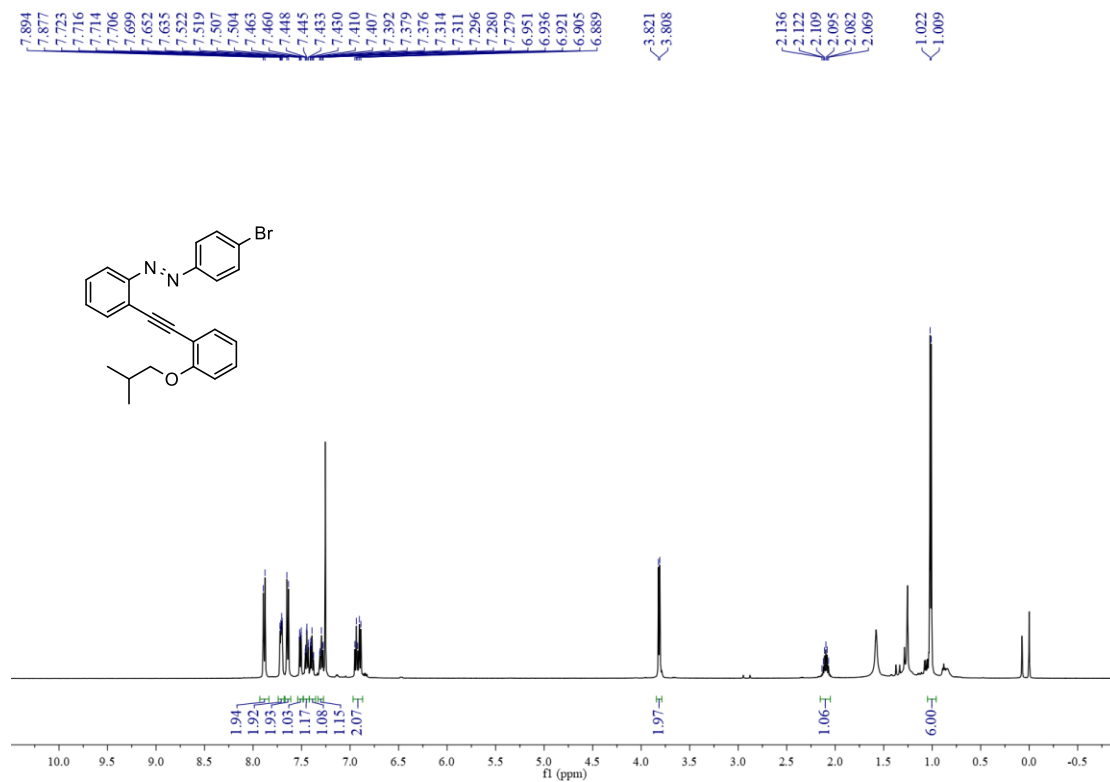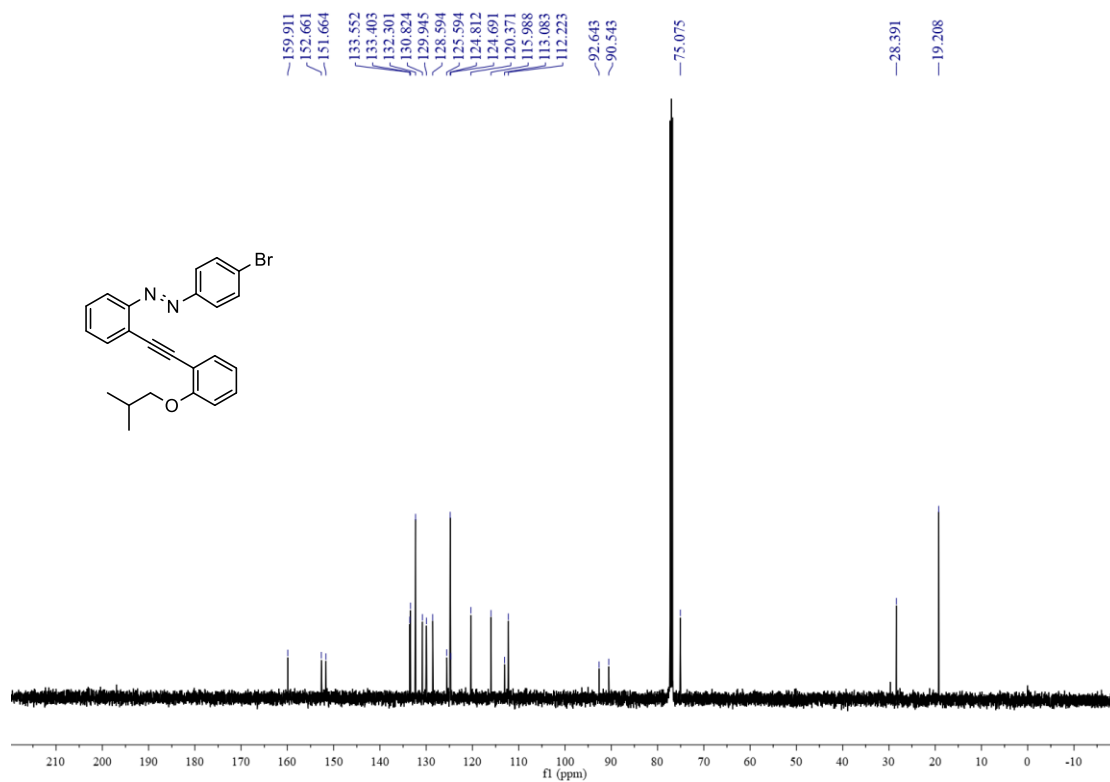

**(E)-1-(4-bromophenyl)-2-((2-(cyclopropylmethoxy)phenyl)ethynyl)phenyl)diazene (1t)**

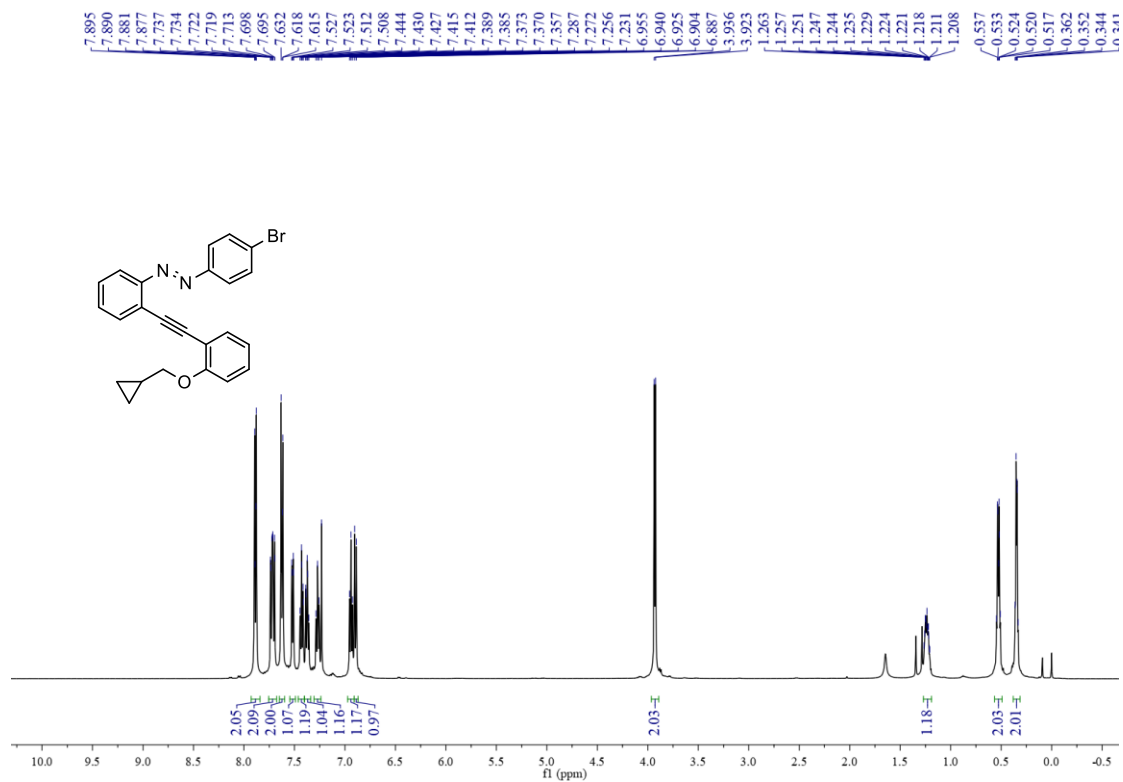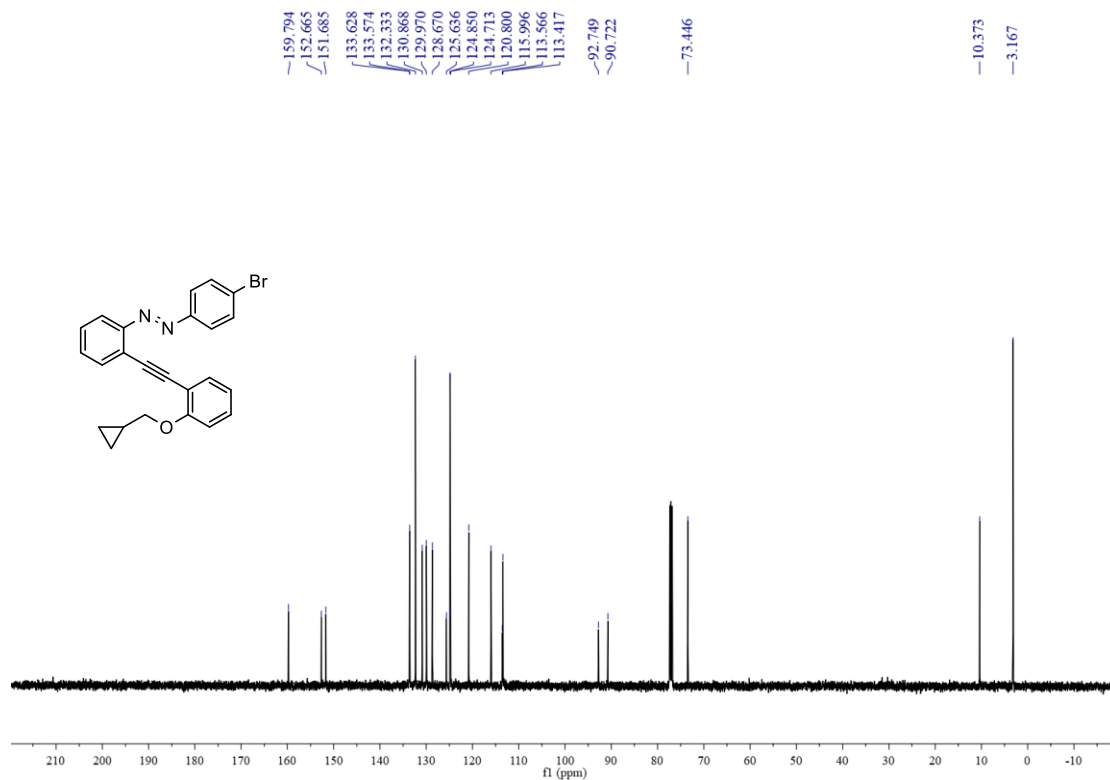

**(E)-1-(4-bromophenyl)-2-(2-((2-(3-methoxypropoxy)phenyl)ethynyl)phenyl)diazene (1u)**

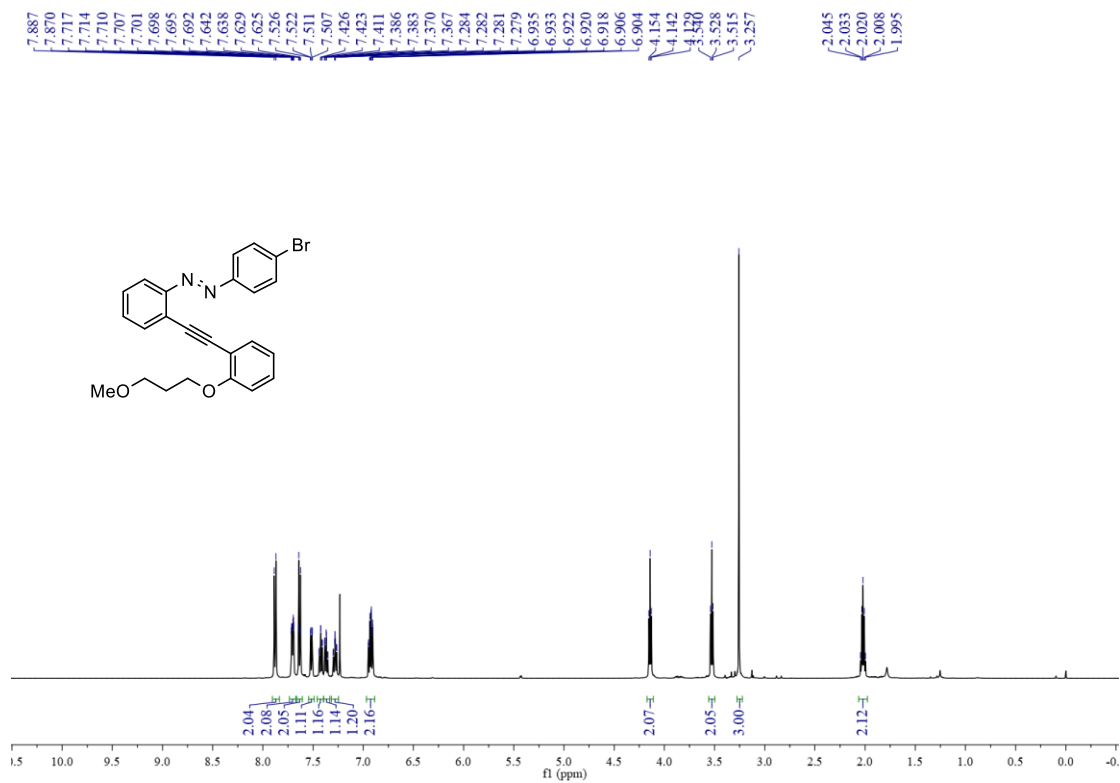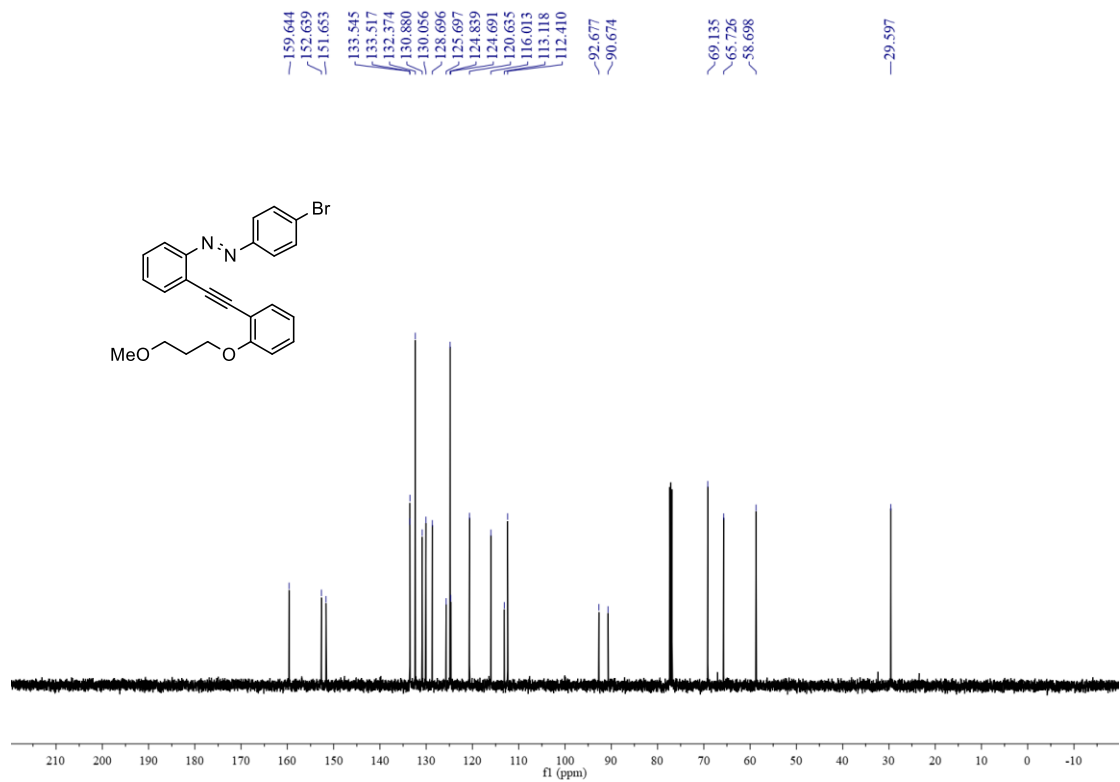



*(E)*-1-(2-((2-(benzyloxy)phenyl)ethynyl)phenyl)-2-phenyldiazene (1v)

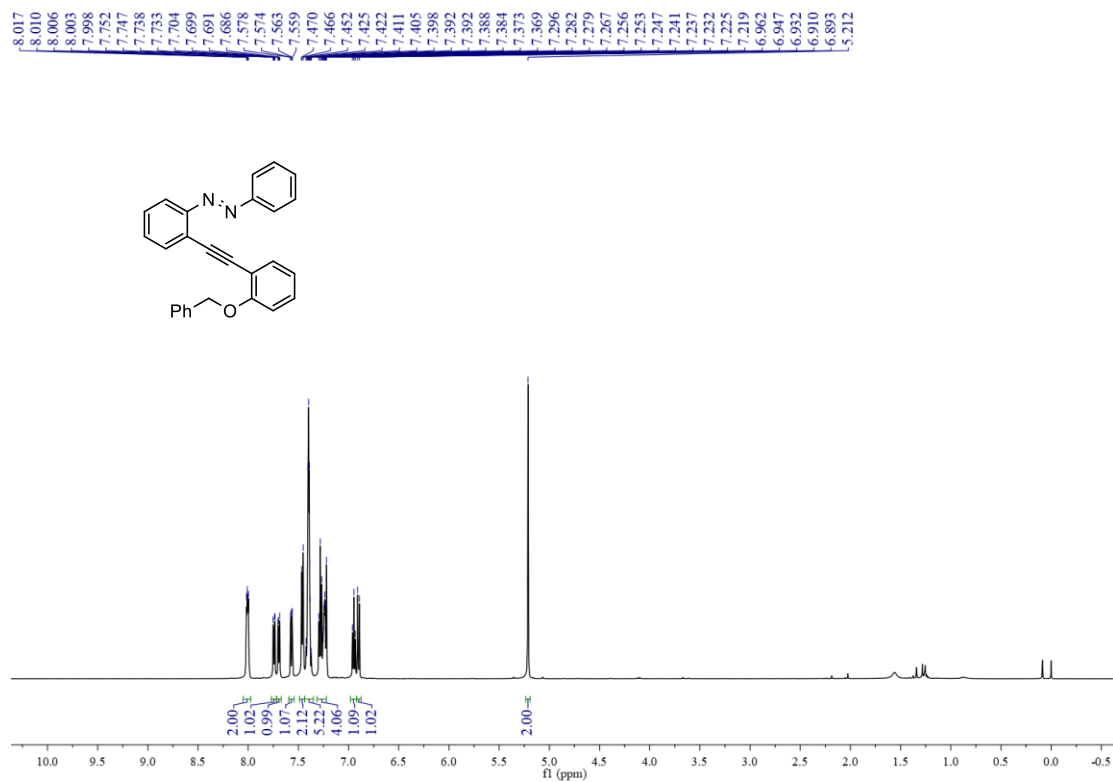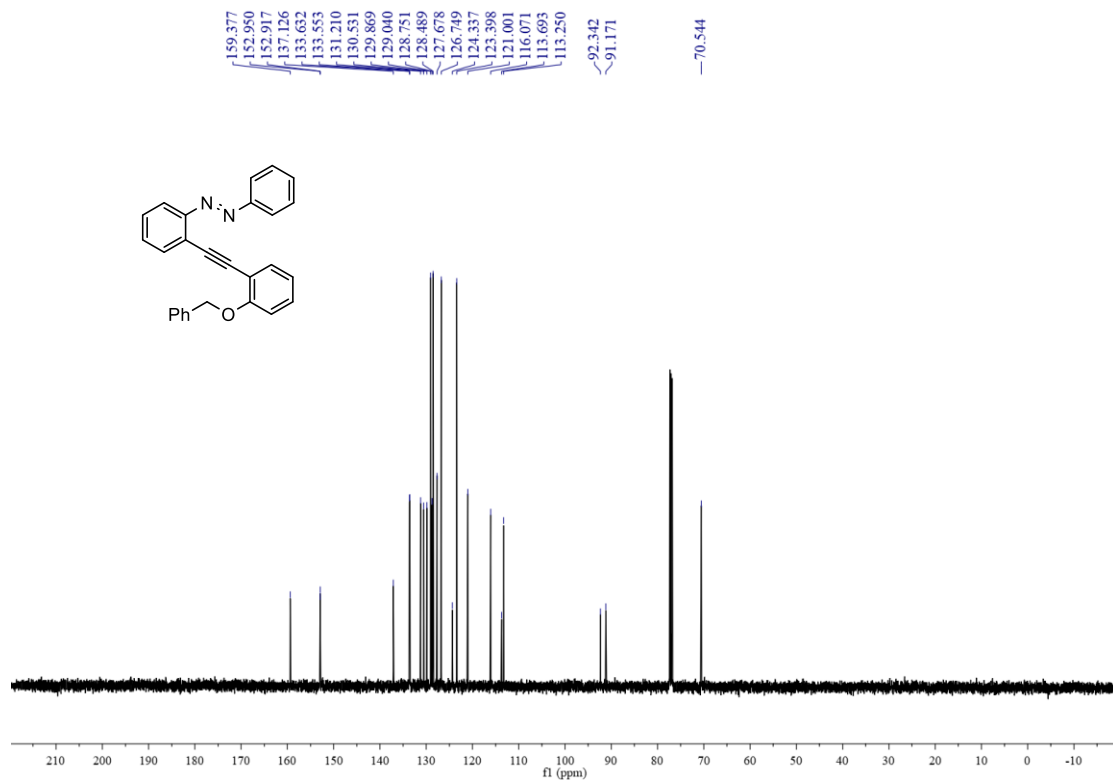

*(E)*-1-(2-((2-(benzyloxy)phenyl)ethynyl)phenyl)diazene (1w)

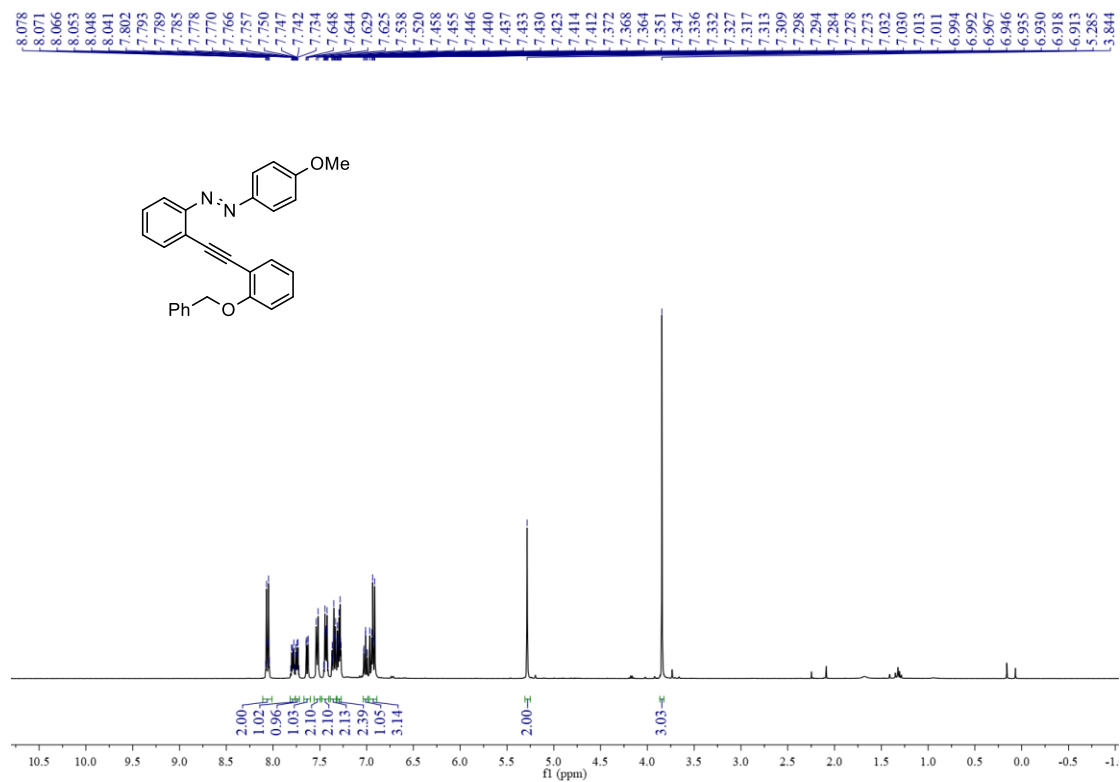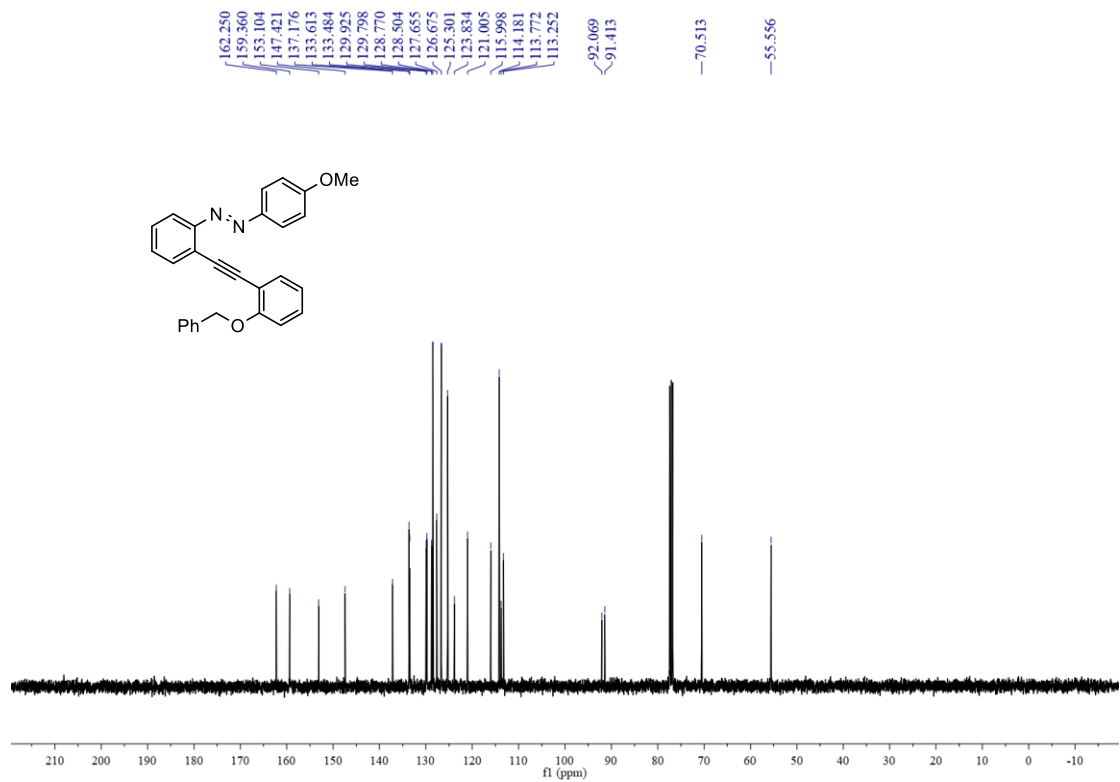

*(E)*-1-(2-((2-(benzyloxy)phenyl)ethynyl)-4-fluorophenyl)-2-(4-bromophenyl)diazene (*1x*)

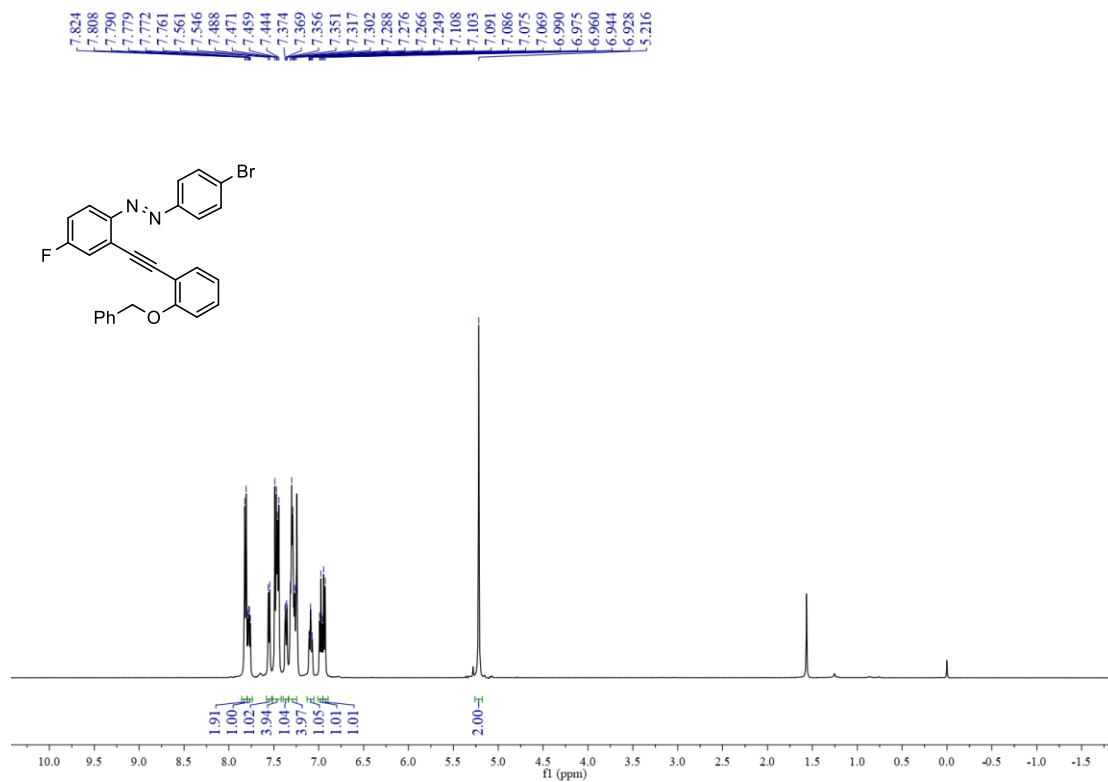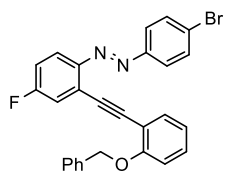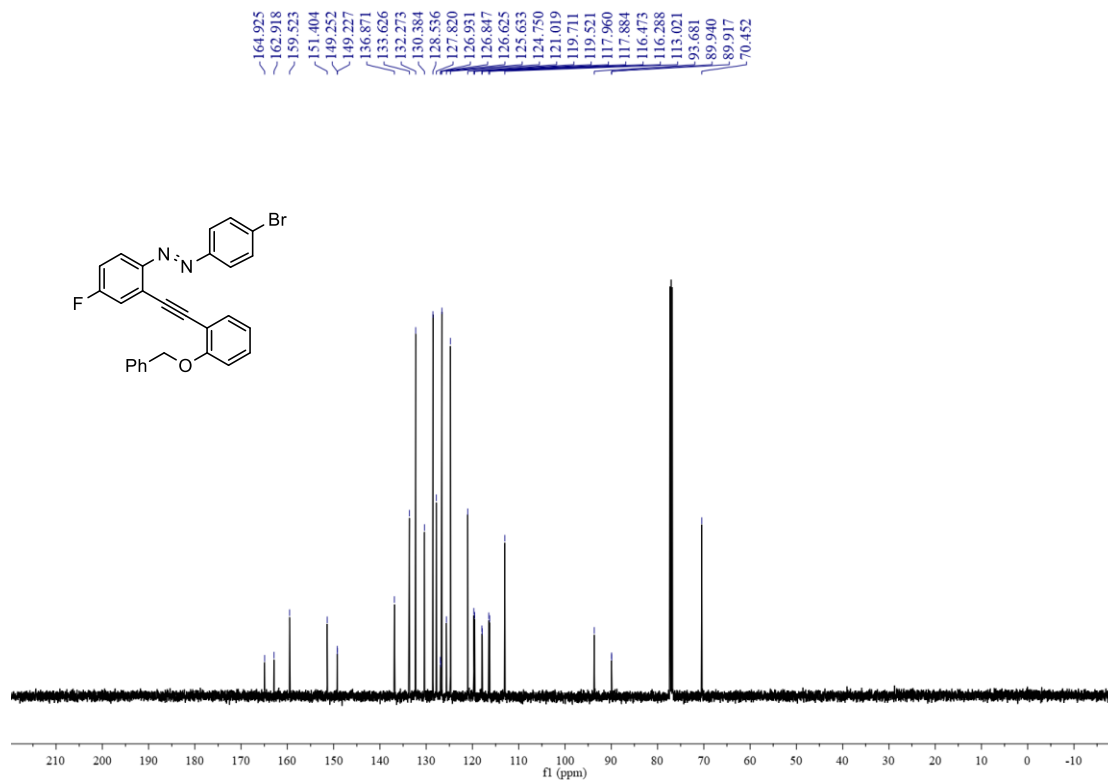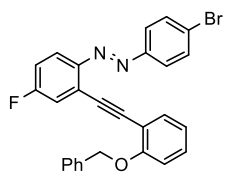

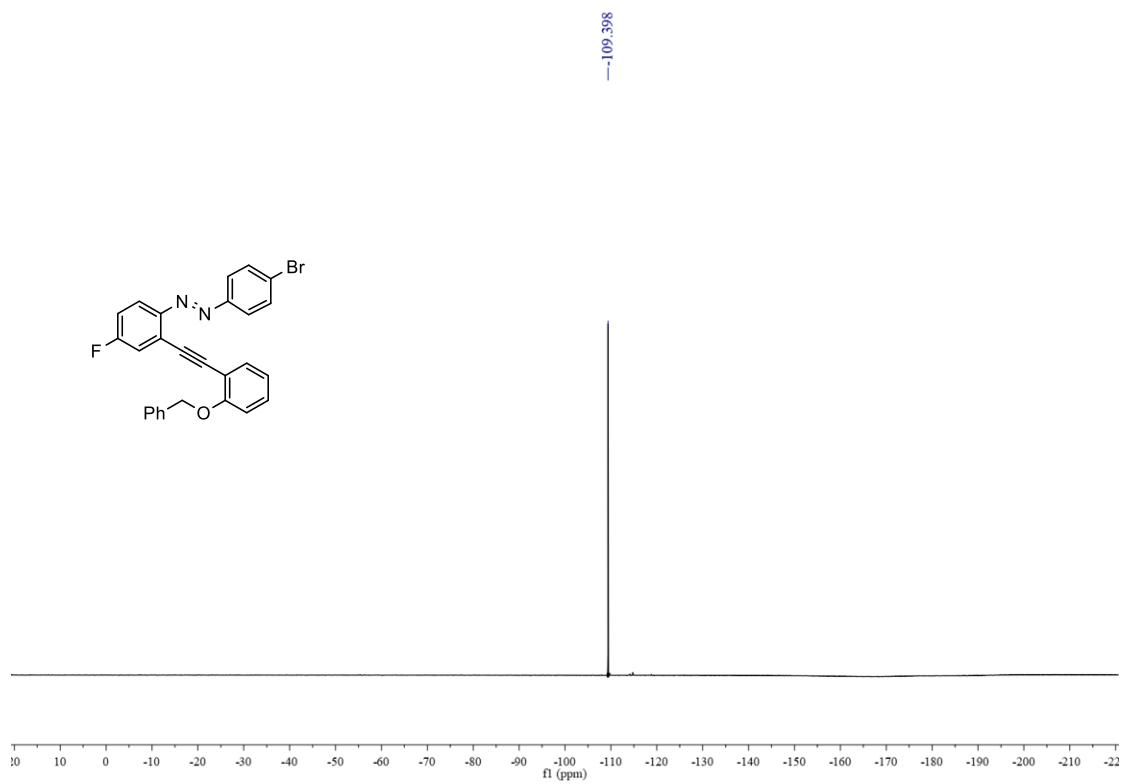

*(E)*-1-(2-((2-(benzyloxy)phenyl)ethynyl)-4-methoxyphenyl)-2-(4-bromophenyl)diazene (*1y*)

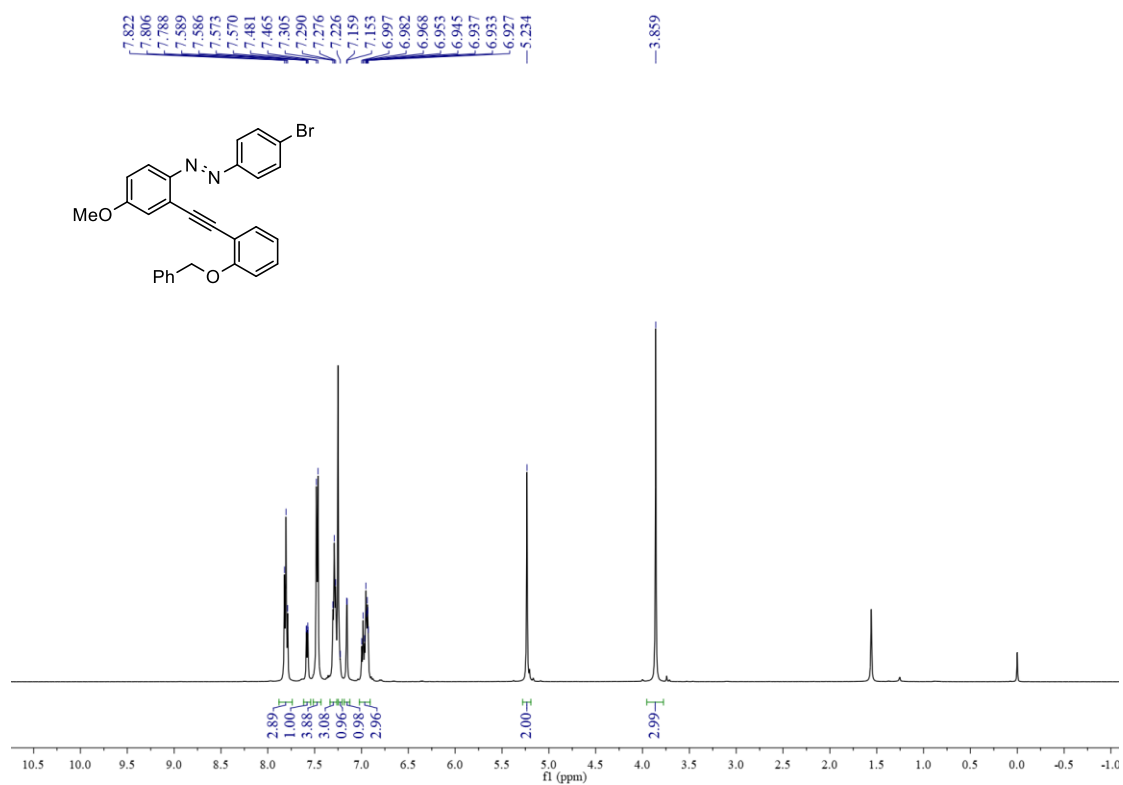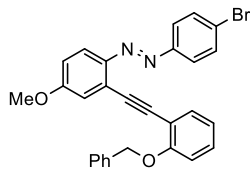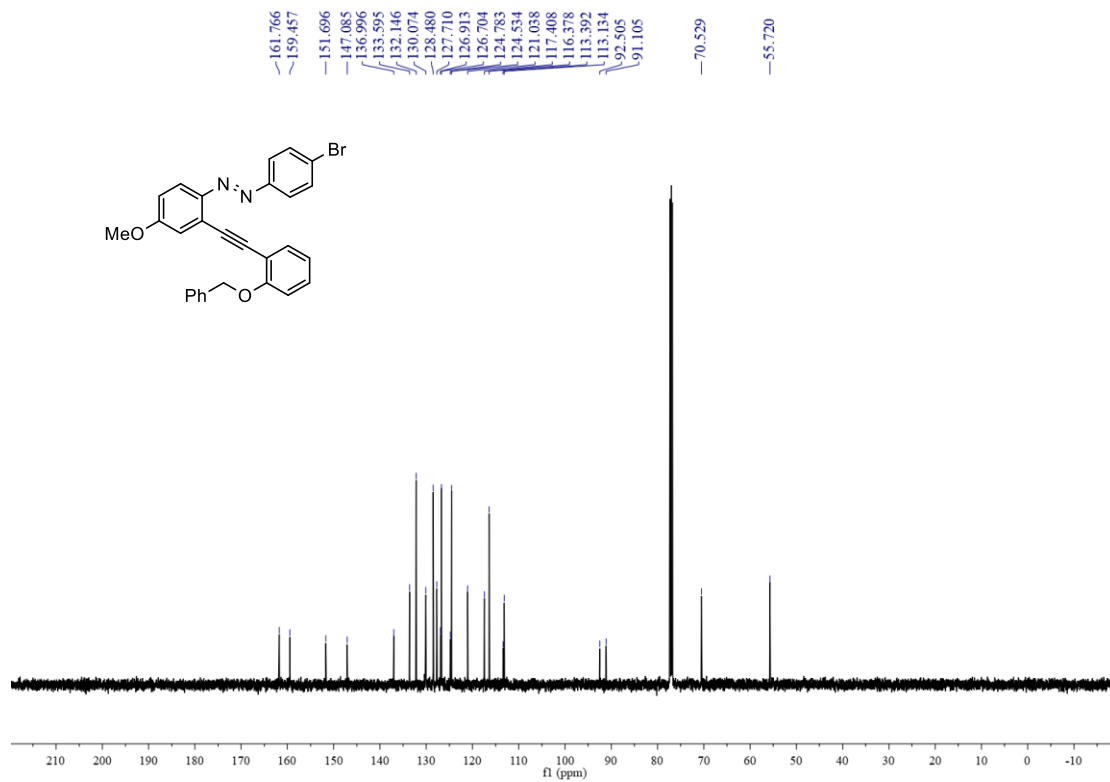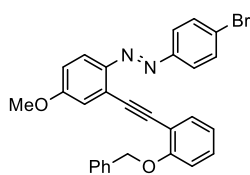

*(E)*-1-(2-((benzyloxy)phenyl)ethynyl)-4-methylphenyl)-2-phenyldiazene (**1z**)

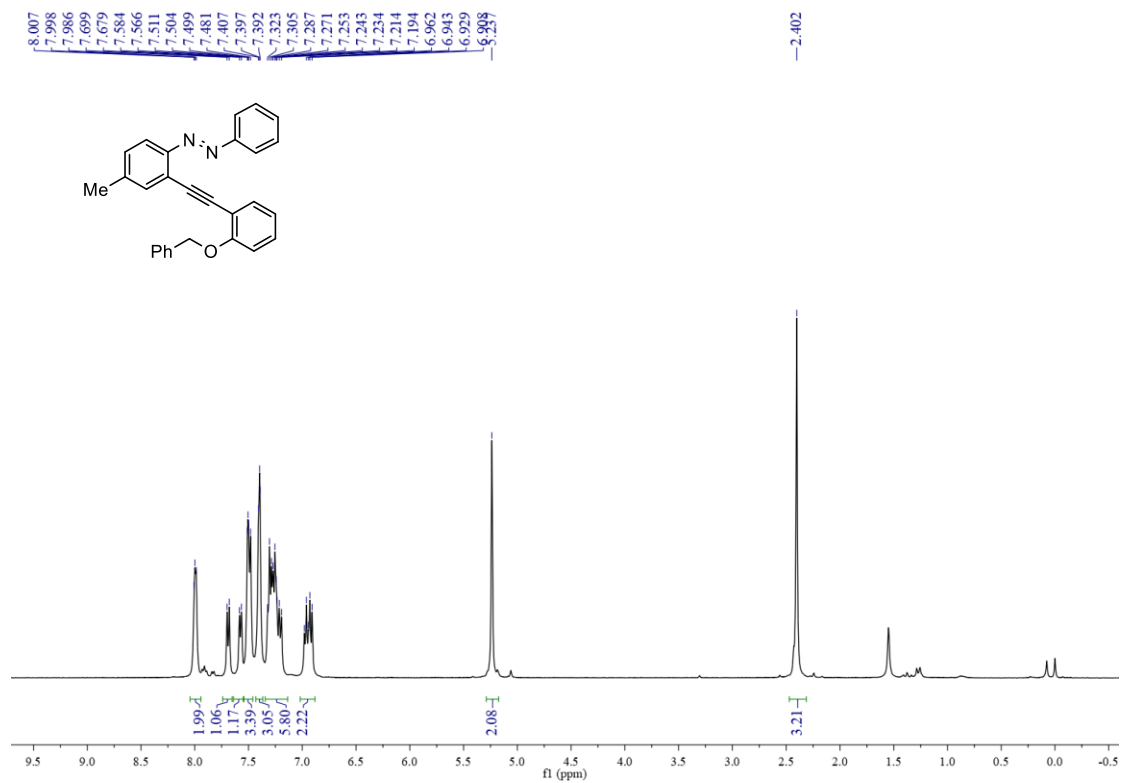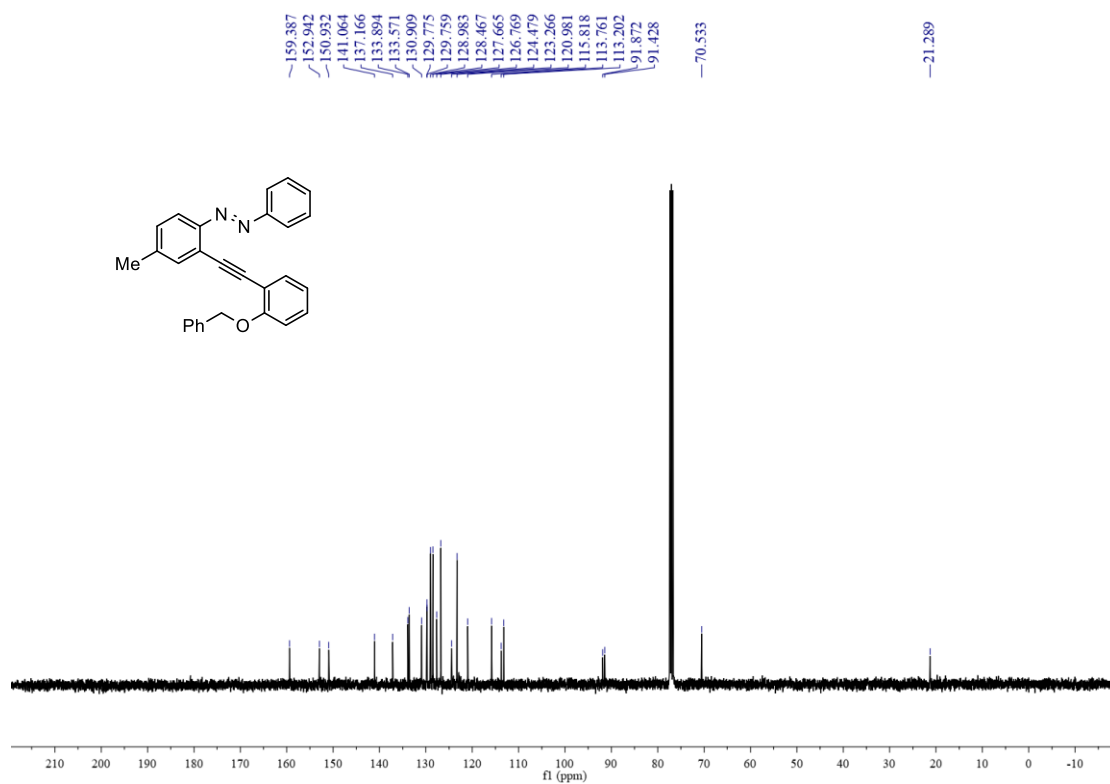

**(E)-1-(2-(4-(benzyloxy)but-1-yn-1-yl)phenyl)-2-(4-bromophenyl)diazene (1aa)**

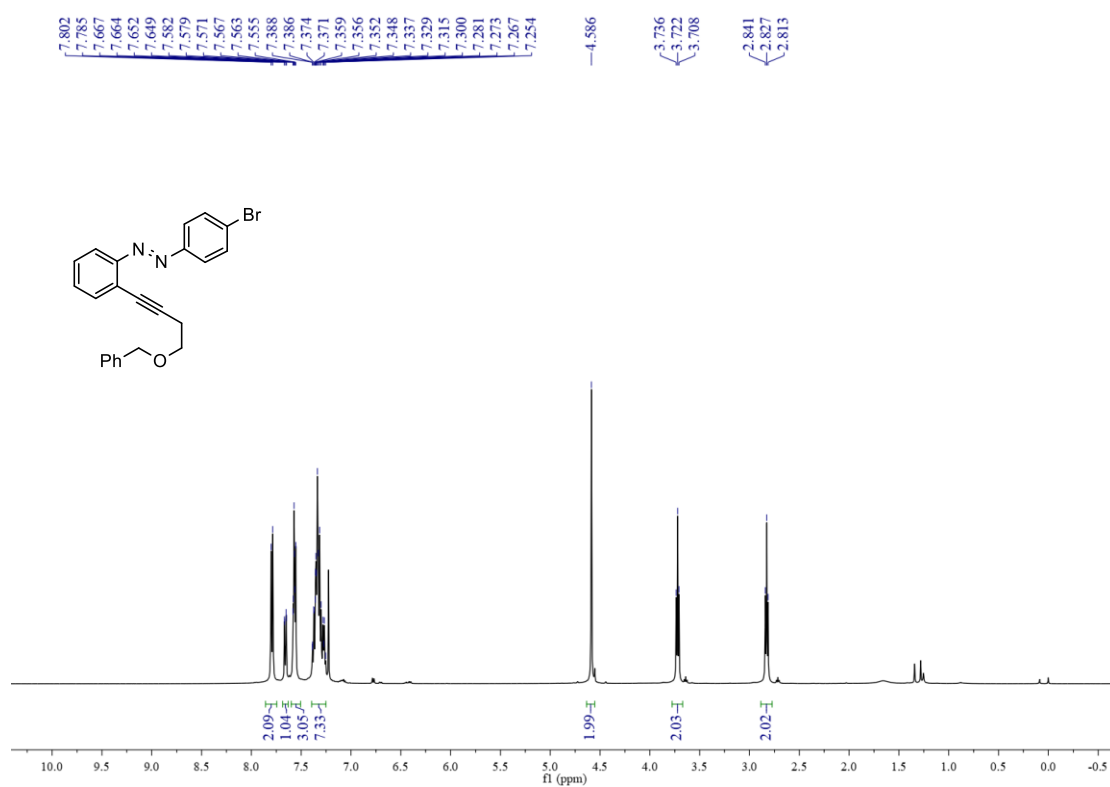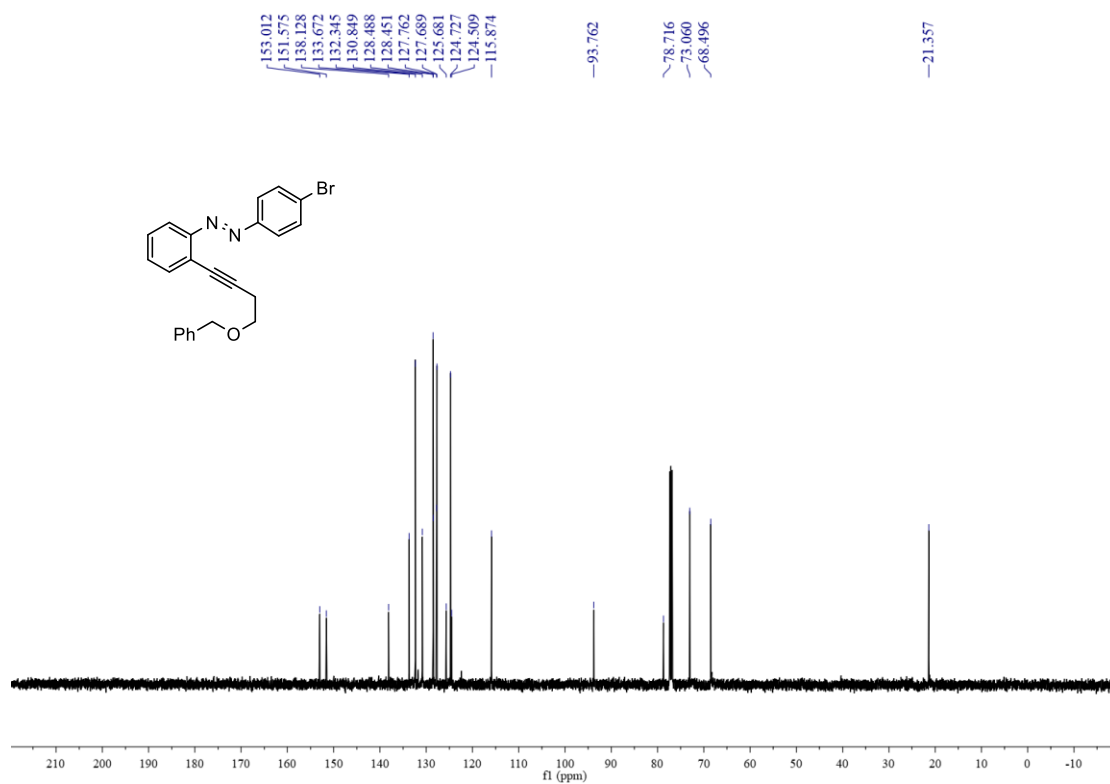

**(E)-1-(2-((2-((4-bromophenyl)diazenyl)phenyl)ethynyl)phenyl)piperidine (1ab)**

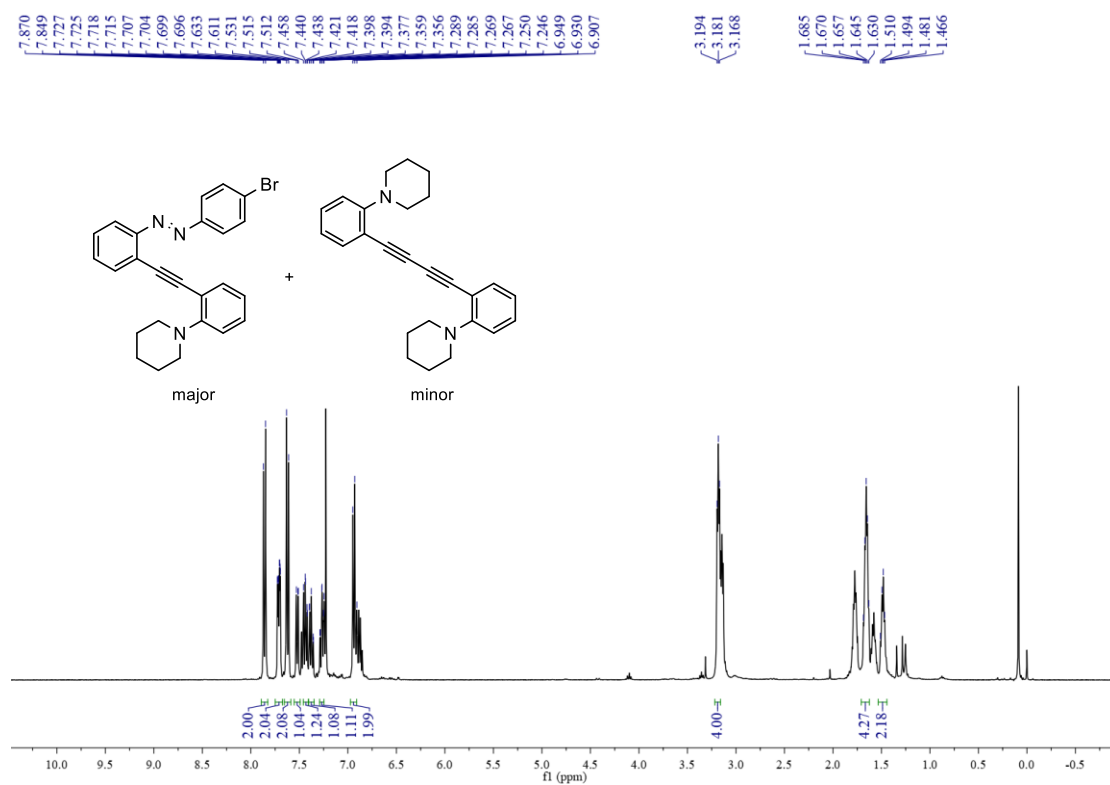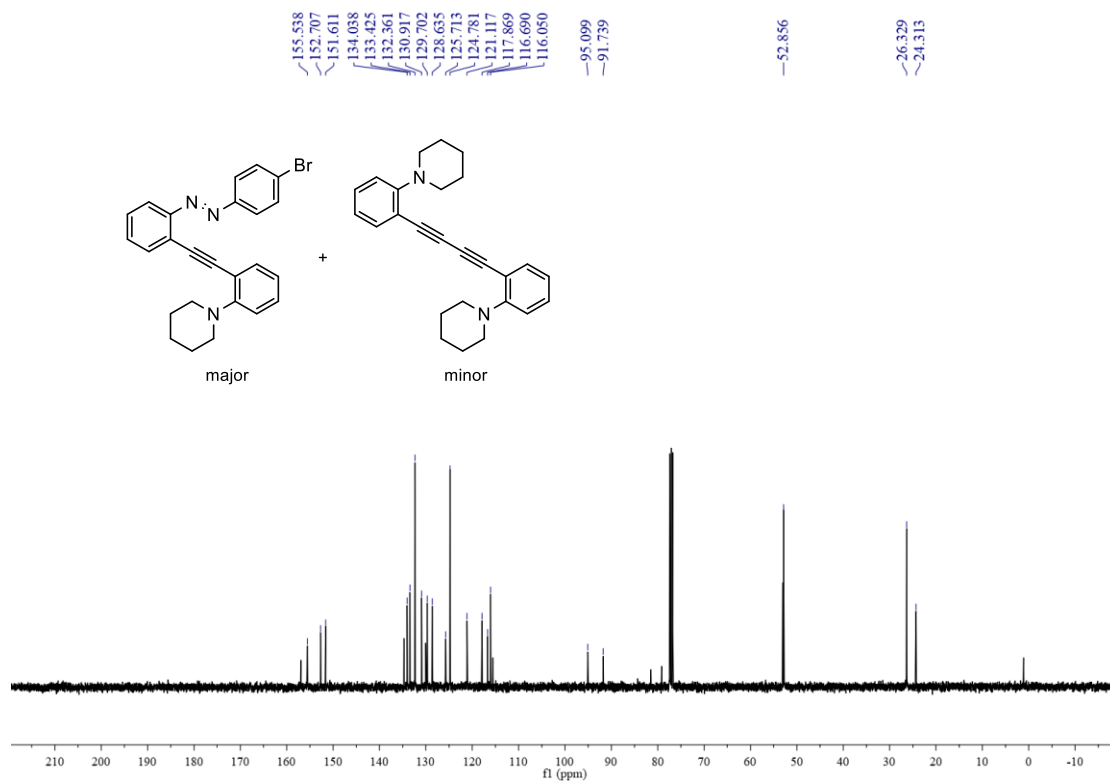



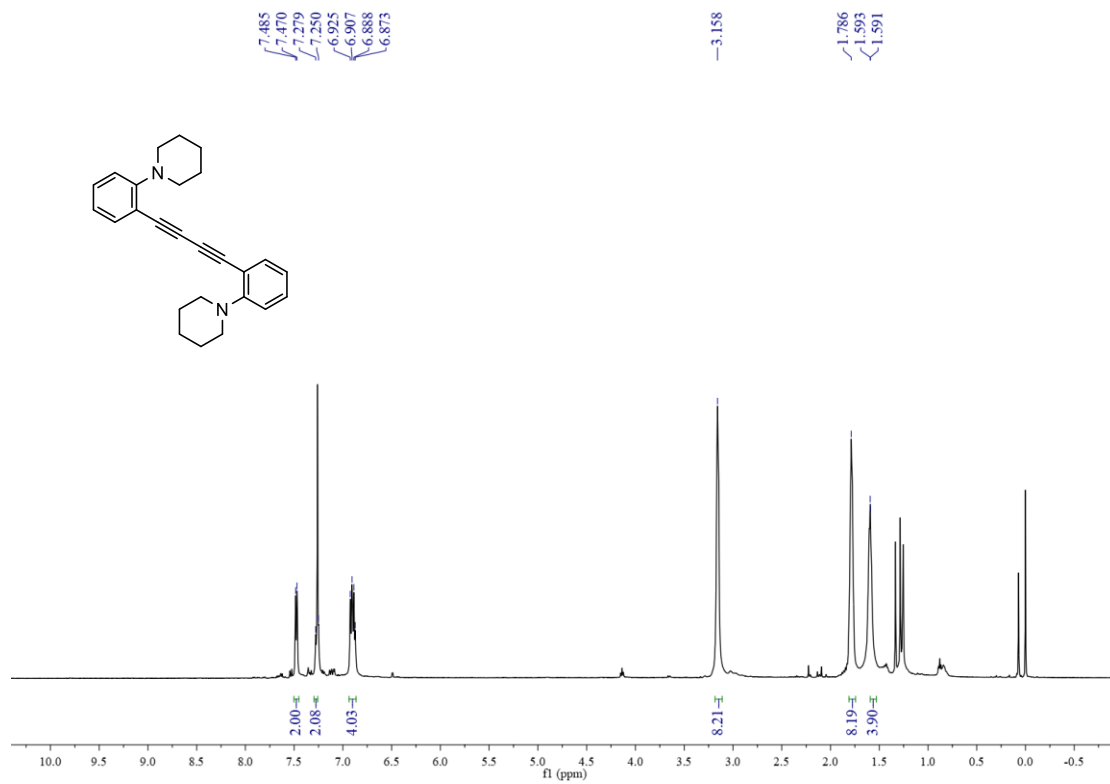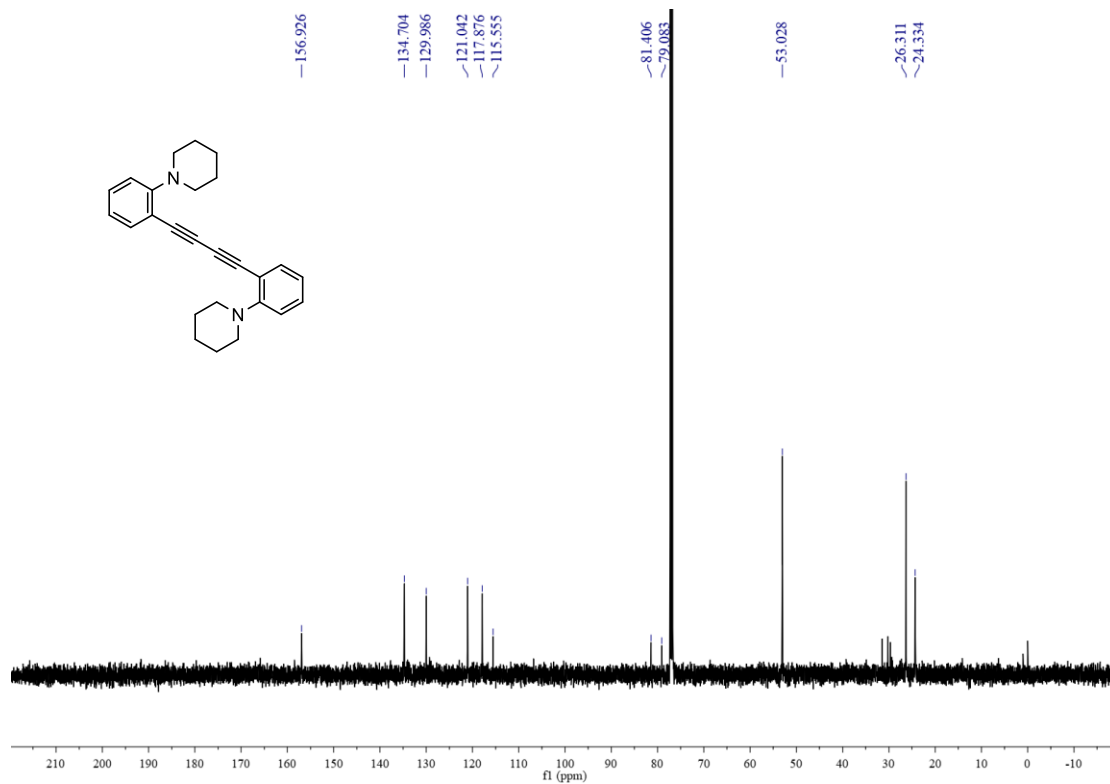

*(E)*-1-(2-((2-(benzylthio)phenyl)ethynyl)phenyl)-2-(4-bromophenyl)diazene (*1ac*)

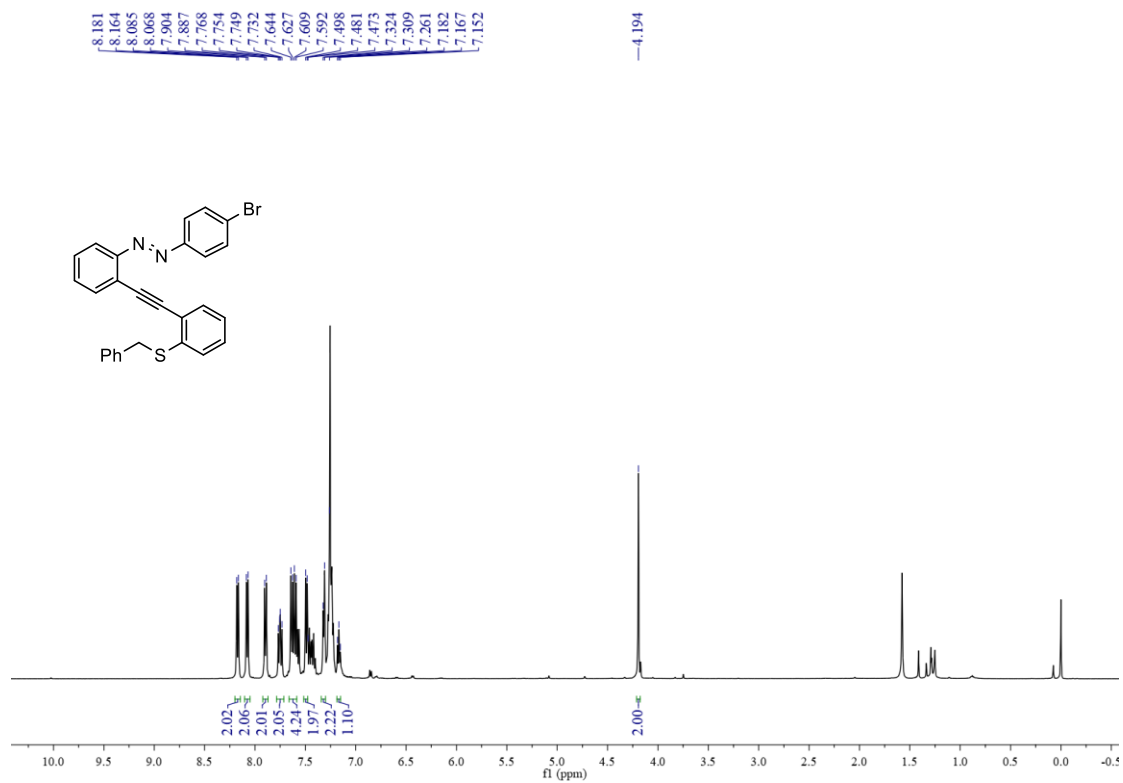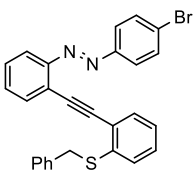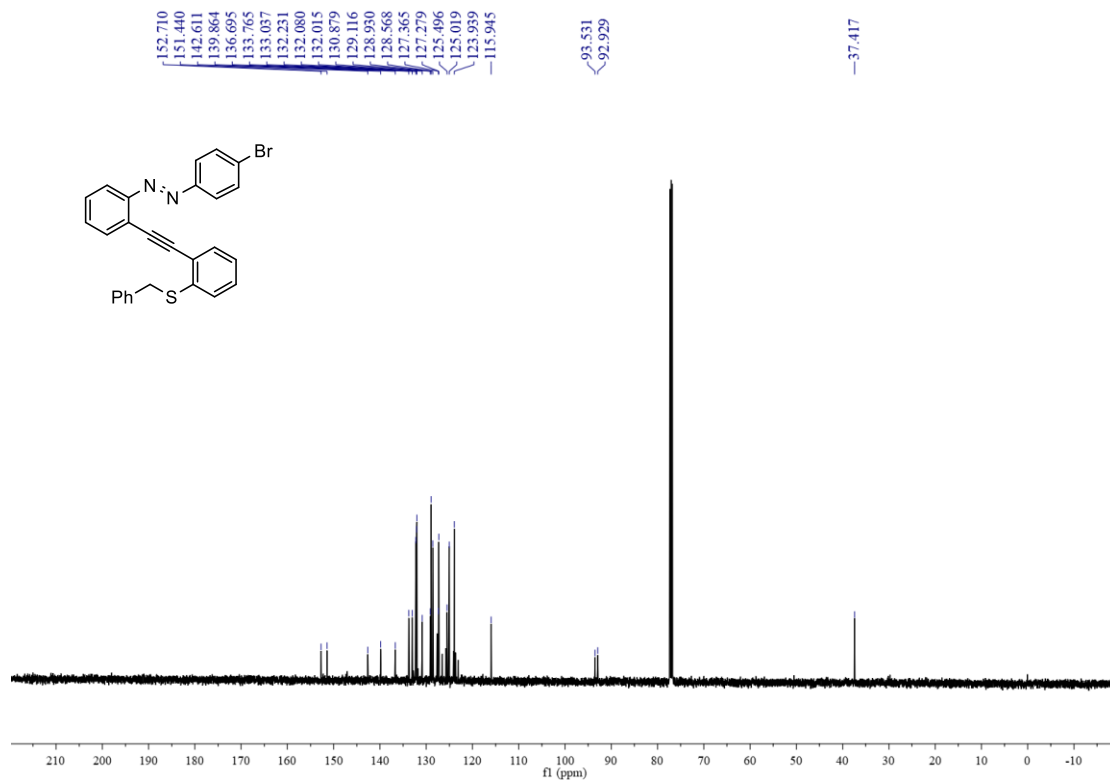

**(E)-1-(2-((2-(benzyloxy)naphthalen-1-yl)ethynyl)phenyl)-2-(4-bromophenyl)diazene (3a)**

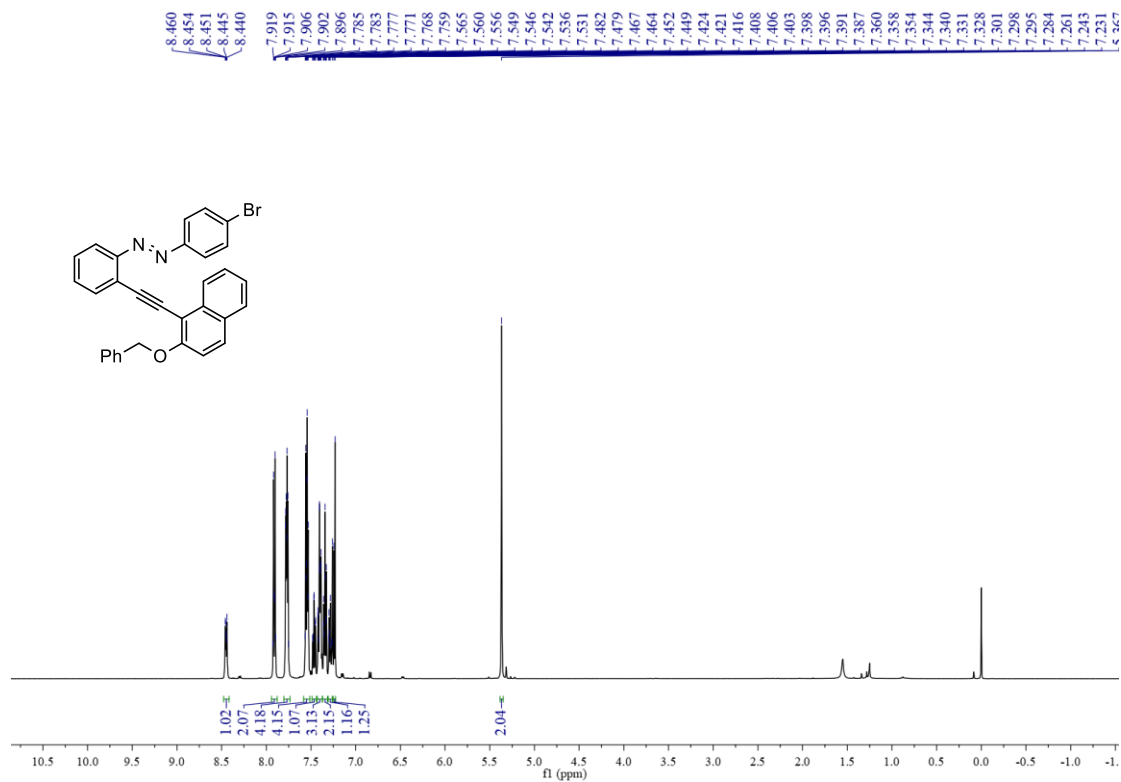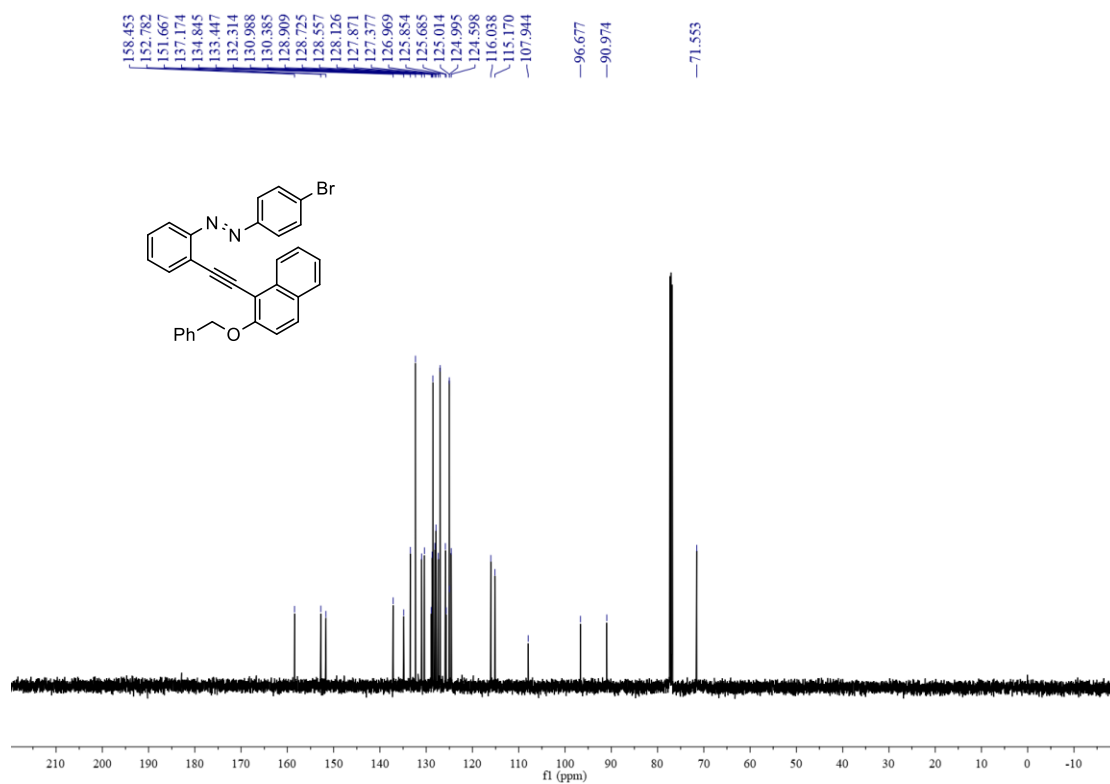

**Methyl (E)-4-(((1-((2-((4-bromophenyl)diazenyl)phenyl)ethynyl)naphthalen-2-yl)oxy)methyl)-benzoate (3b)**

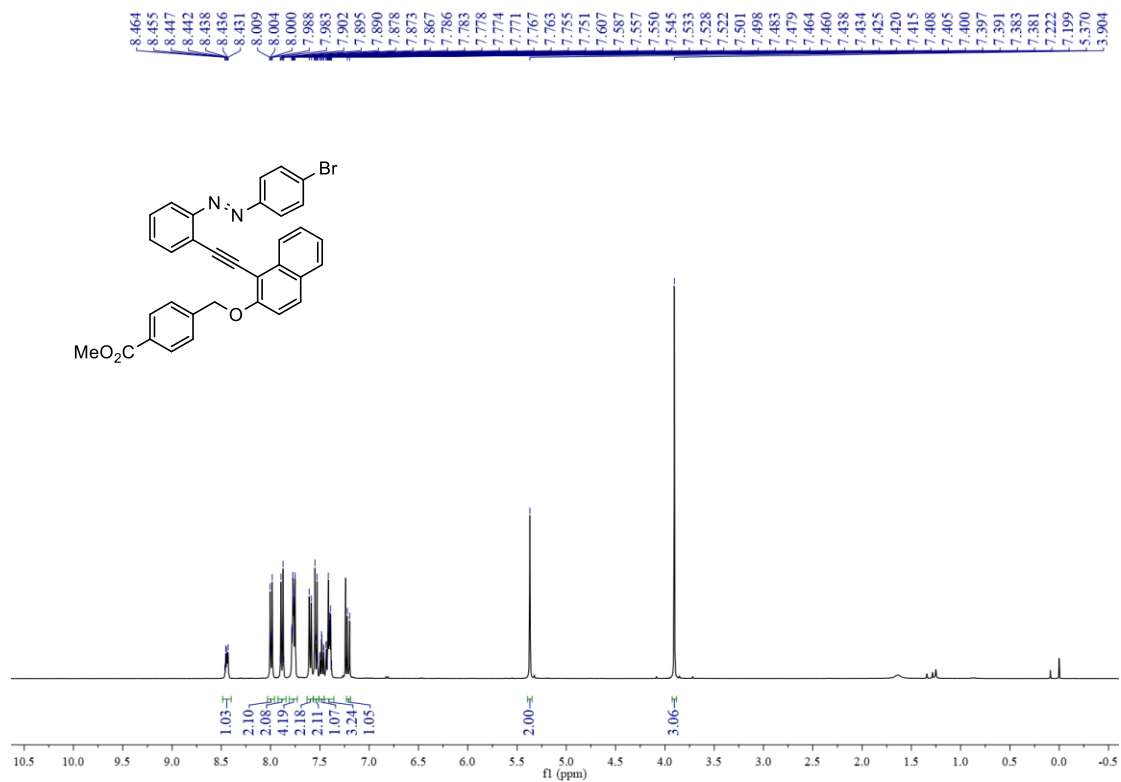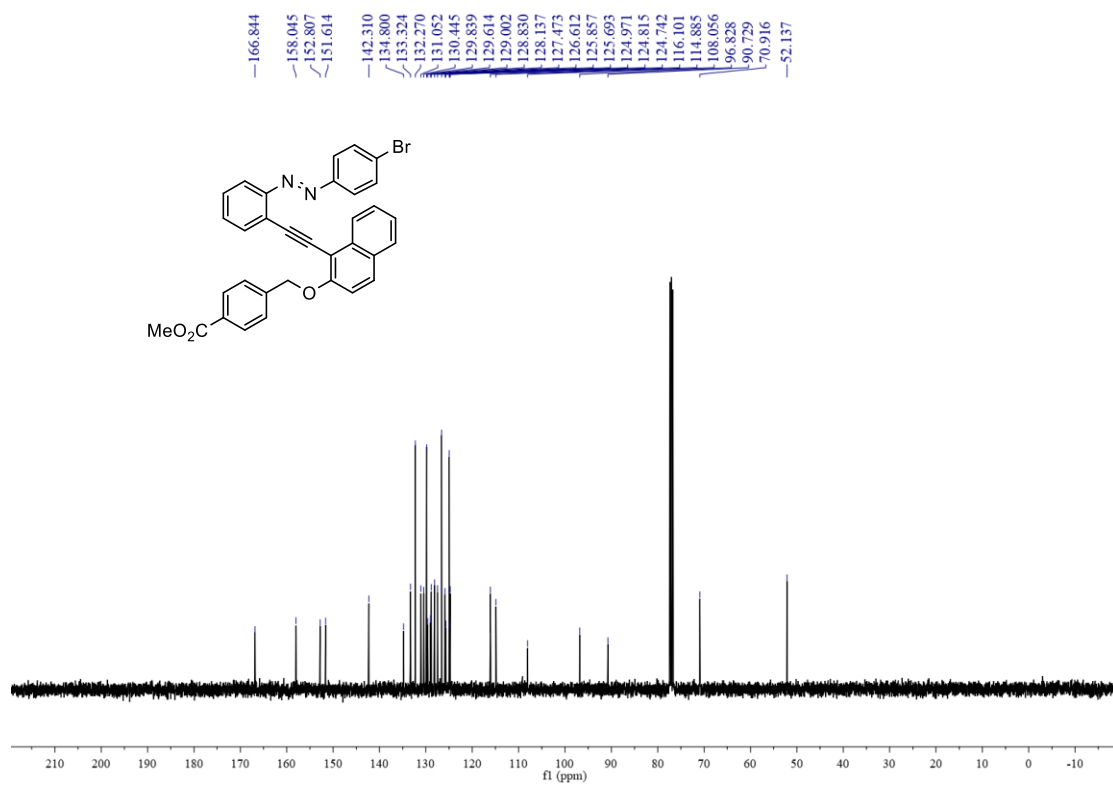

**(E)-1-(4-bromophenyl)-2-(2-((2-(naphthalen-2-ylmethoxy)naphthalen-1-yl)ethynyl)phenyl)diazene**  
**(3c)**

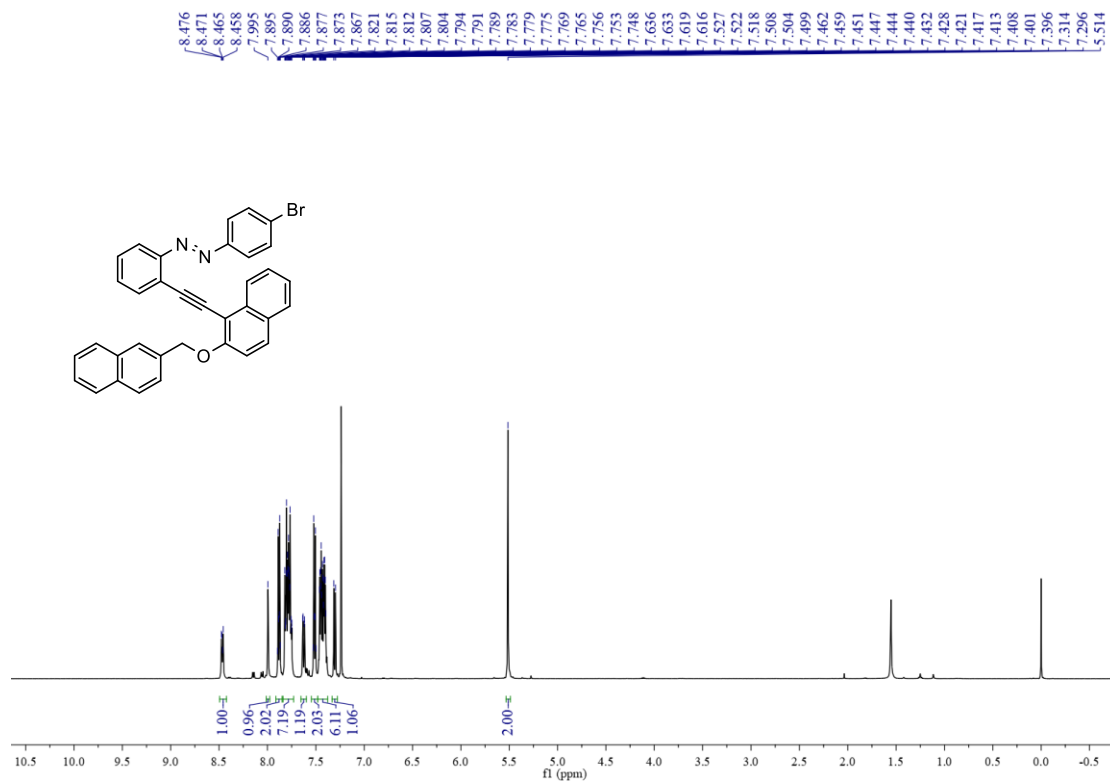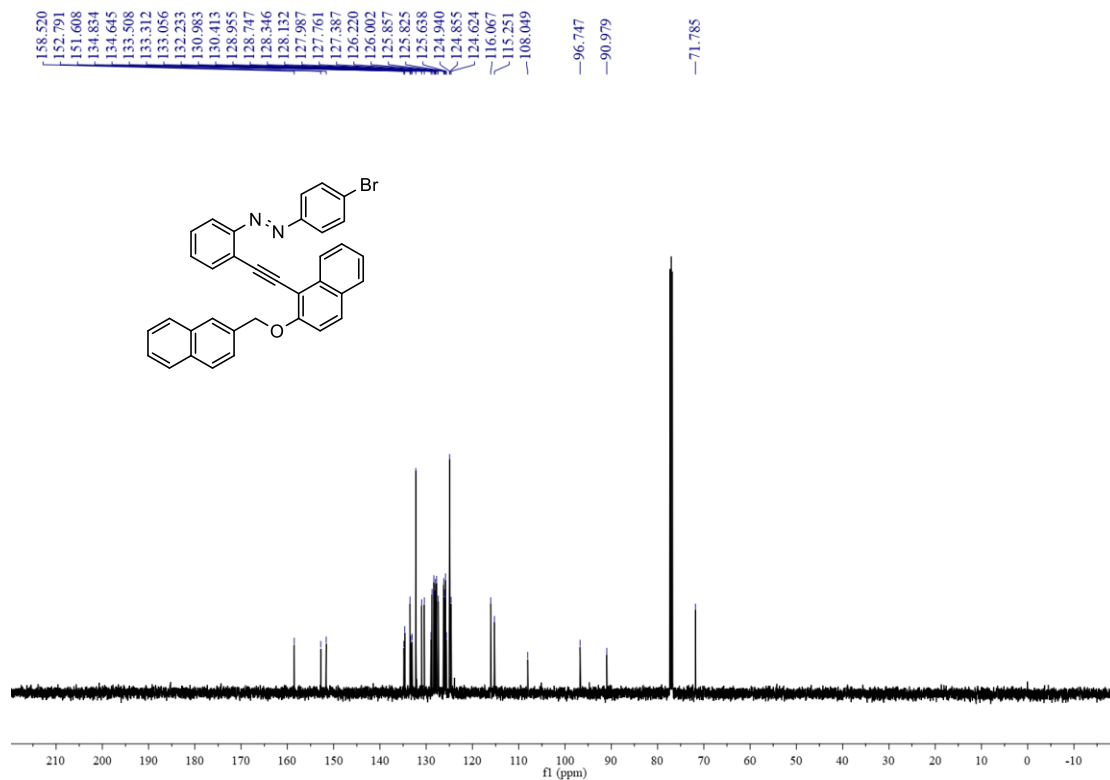

*(E)*-1-(4-chlorophenyl)-2-(2-((2-((3,5-dibromobenzyl)oxy)naphthalen-1-yl)ethynyl)phenyl)diazene  
**(3d)**

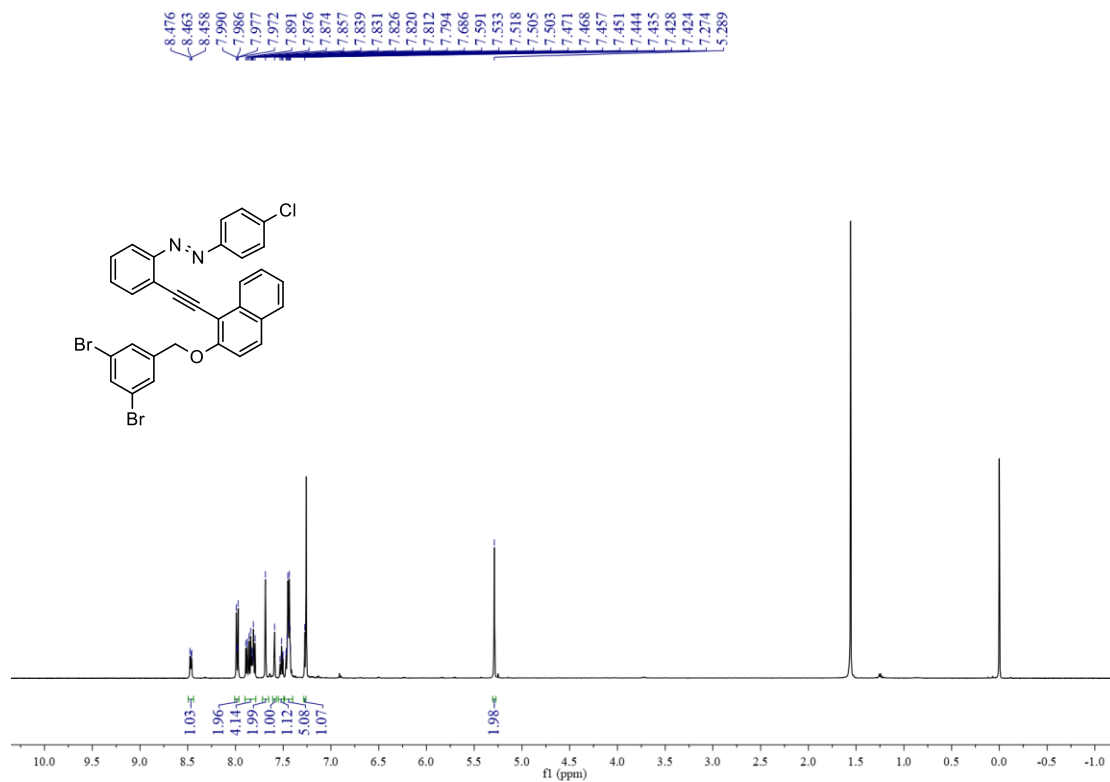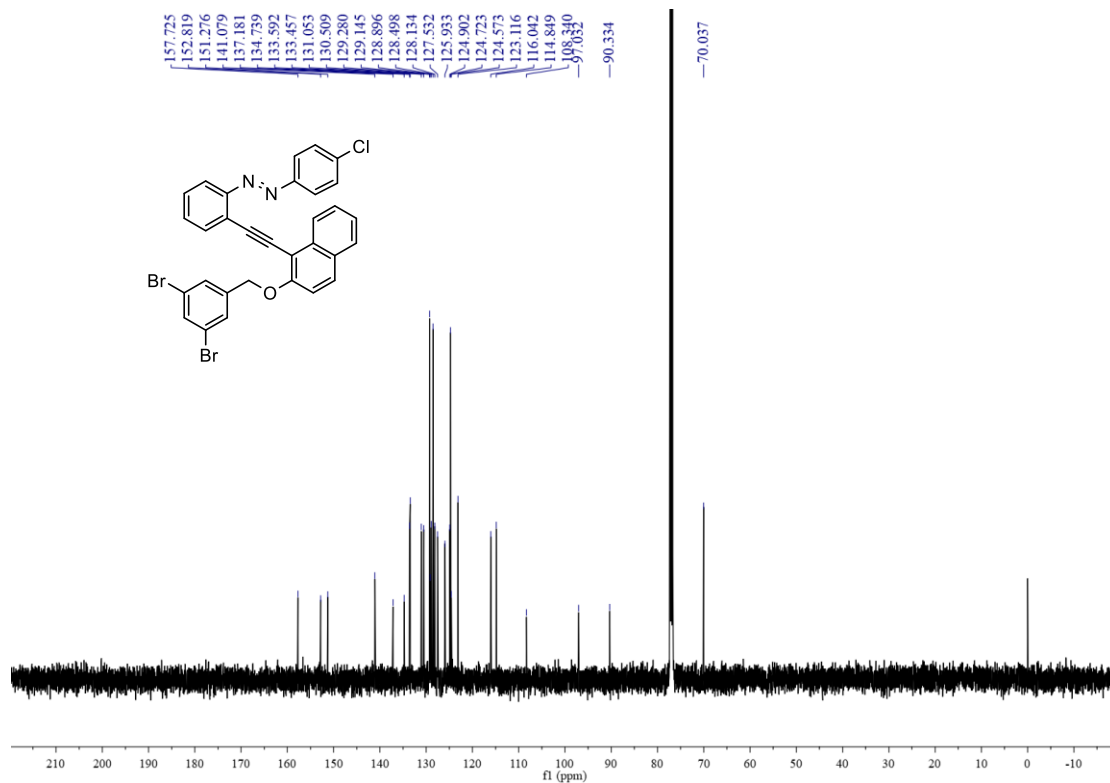

*(E)*-1-(4-bromophenyl)-2-(2-((2-((3,5-difluorobenzyl)oxy)naphthalen-1-yl)ethynyl)phenyl)diazene  
(3e)

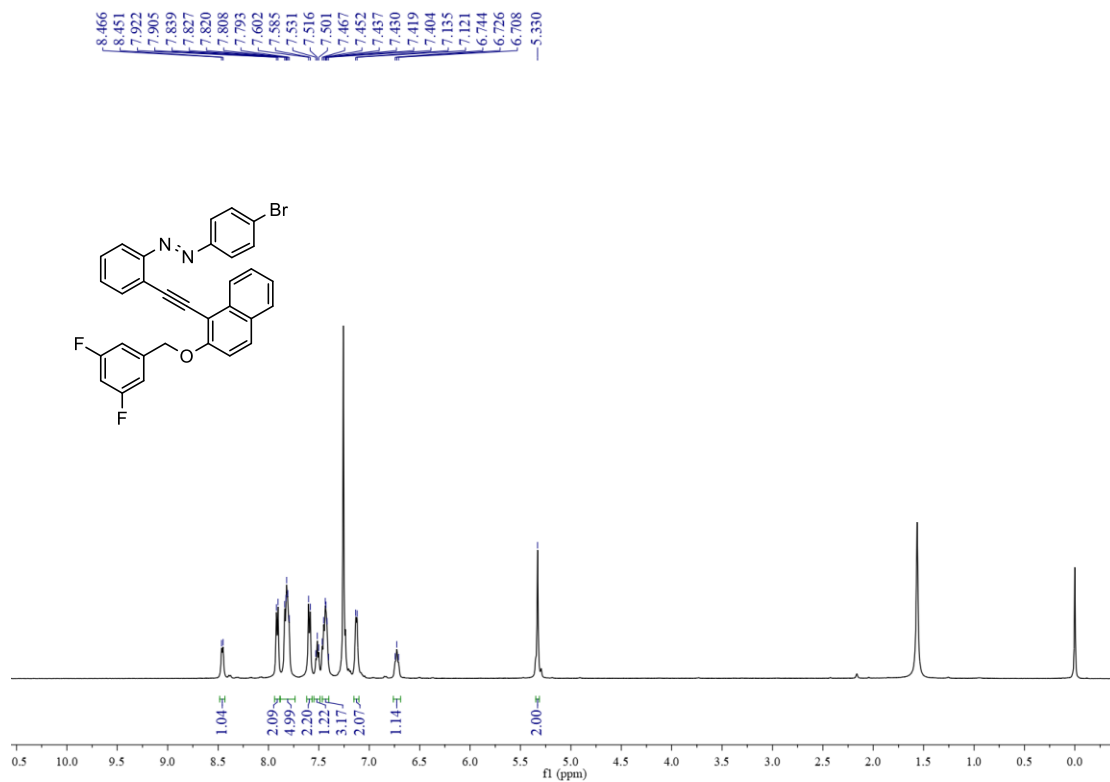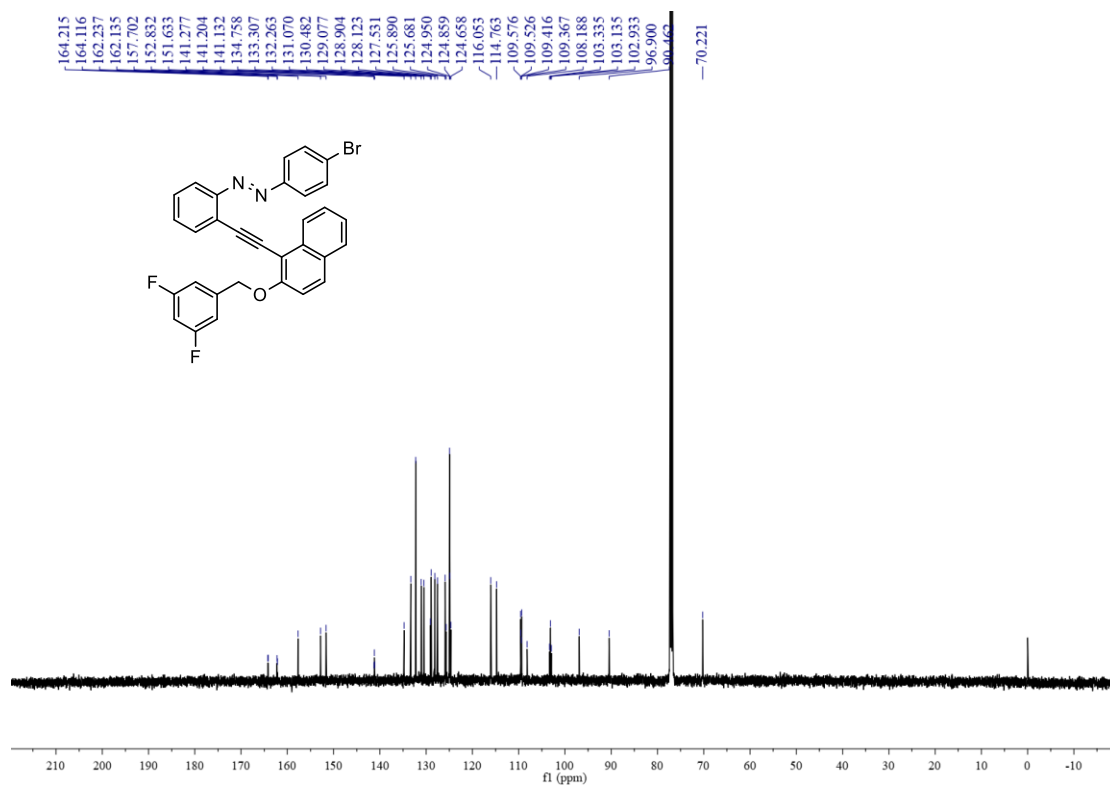

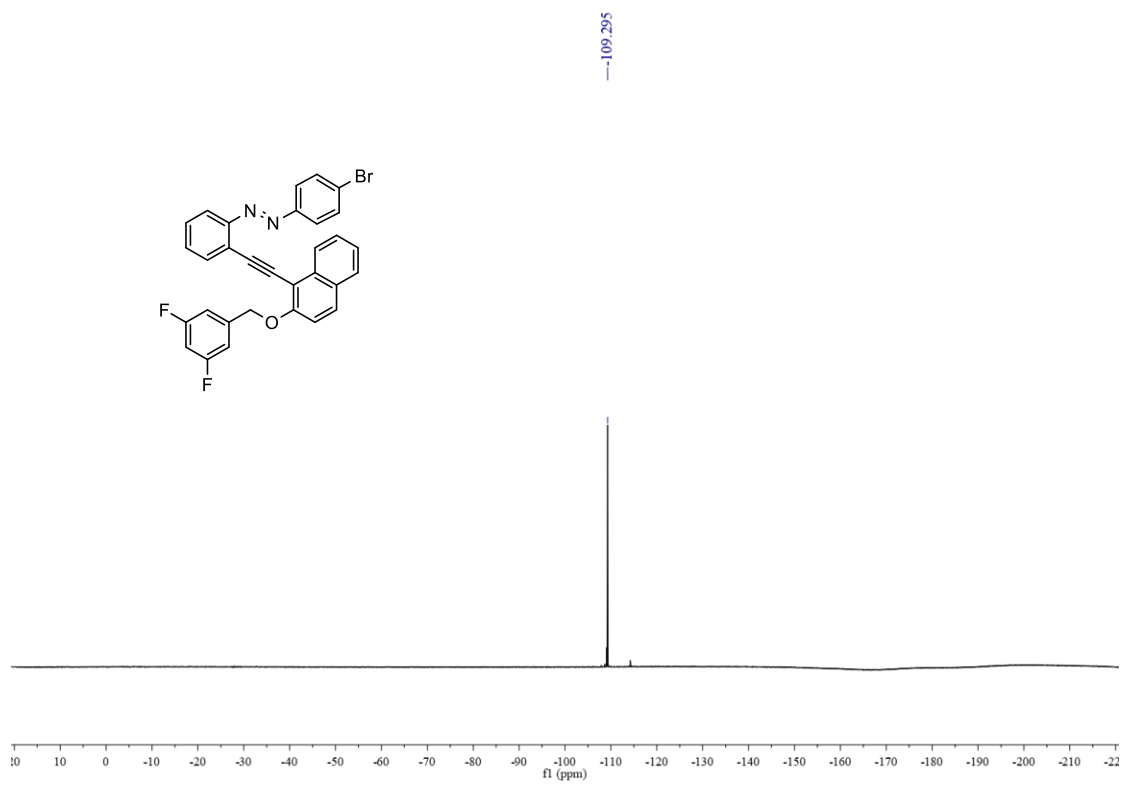



**(E)-1-(4-bromophenyl)-2-(2-((2-((3,5-dichlorobenzyl)oxy)naphthalen-1-yl)ethynyl)phenyl)diazene**  
**(3f)**

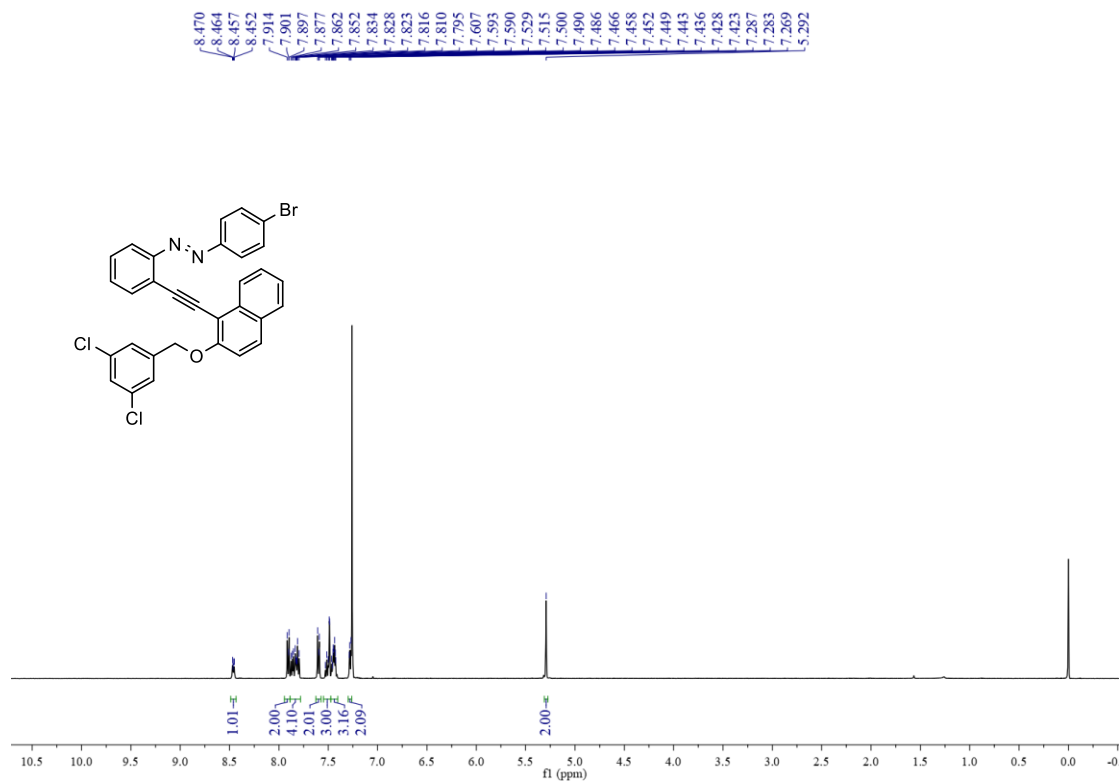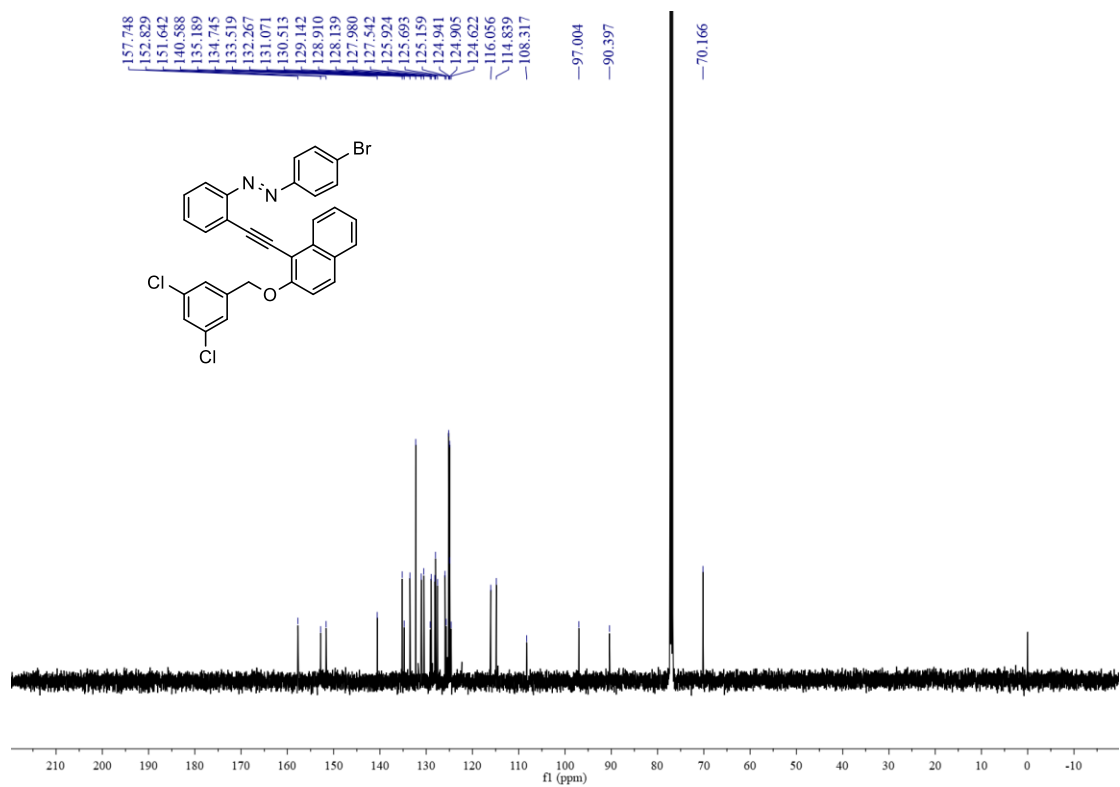

**dimethyl (E)-5-(((1-((2-((4-bromophenyl)diazenyl)phenyl)ethynyl)naphthalen-2-yl)oxy)methyl)-isophthalate (3g)**

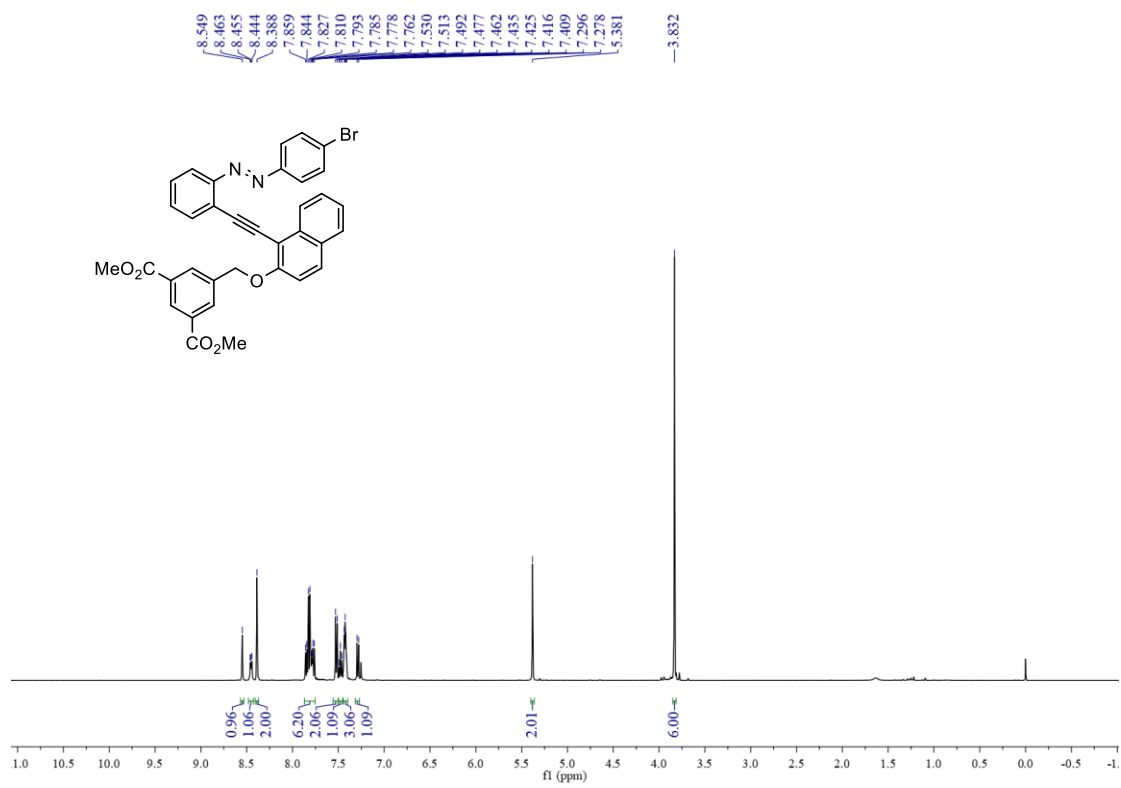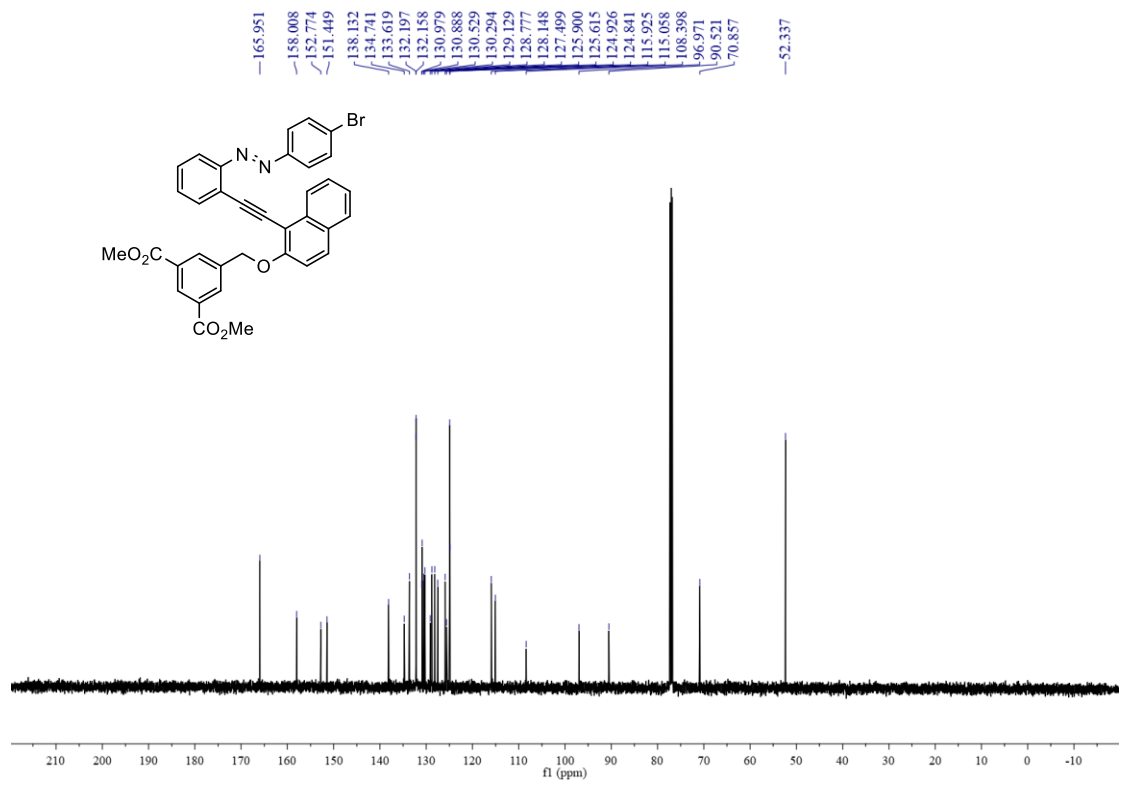

*(E)*-1-(4-bromophenyl)-2-((2-((3,5-dimethoxybenzyl)oxy)naphthalen-1-yl)ethynyl)phenyl)diazene  
**(3h)**

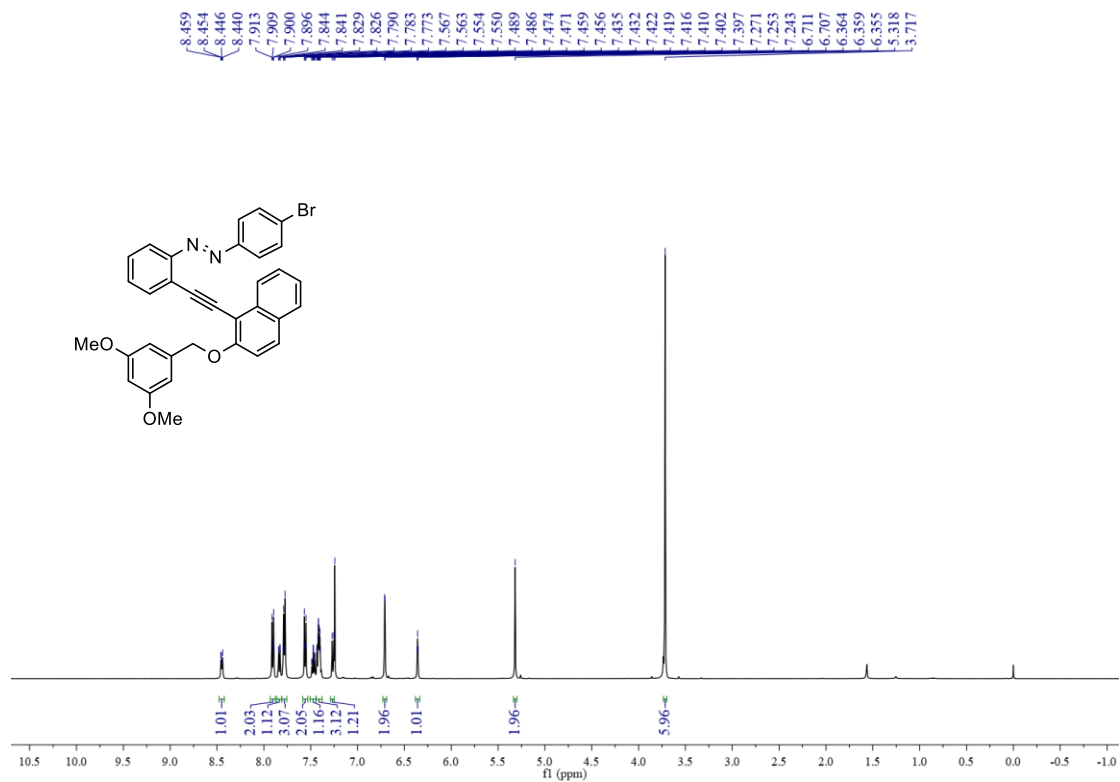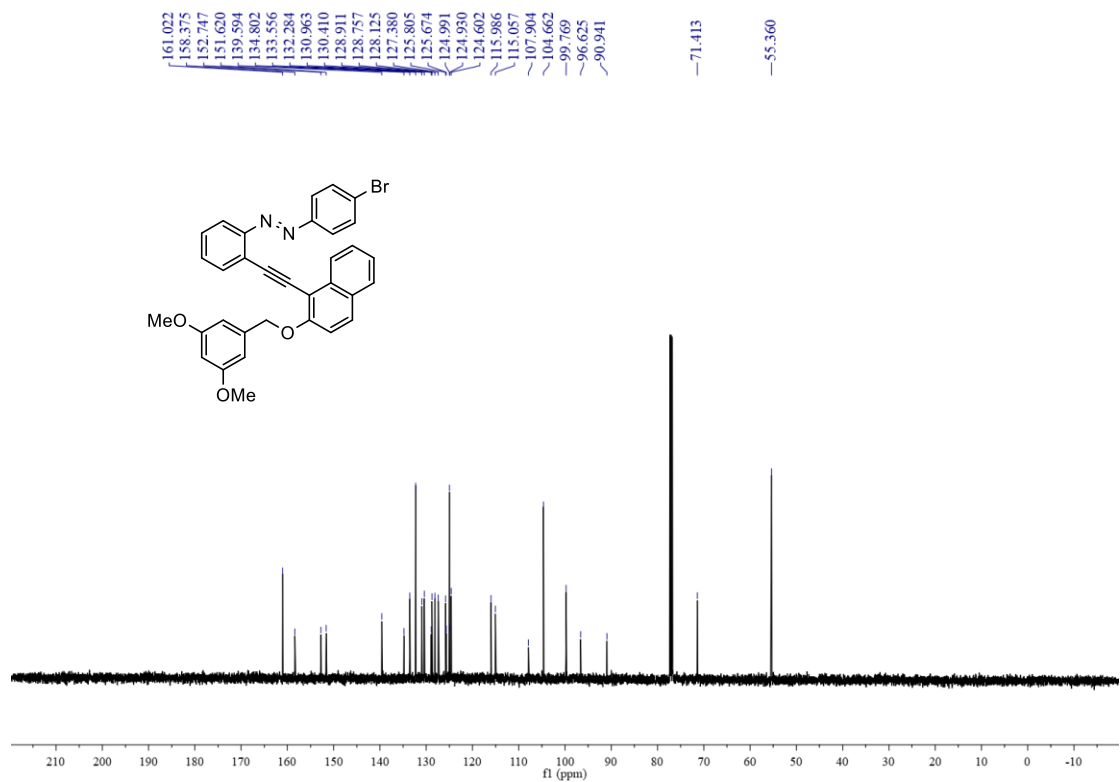

*(E)*-1-(2-((2-(benzyloxy)phenyl)ethynyl)phenyl)-*N*-(*tert*-butyl)methanimine

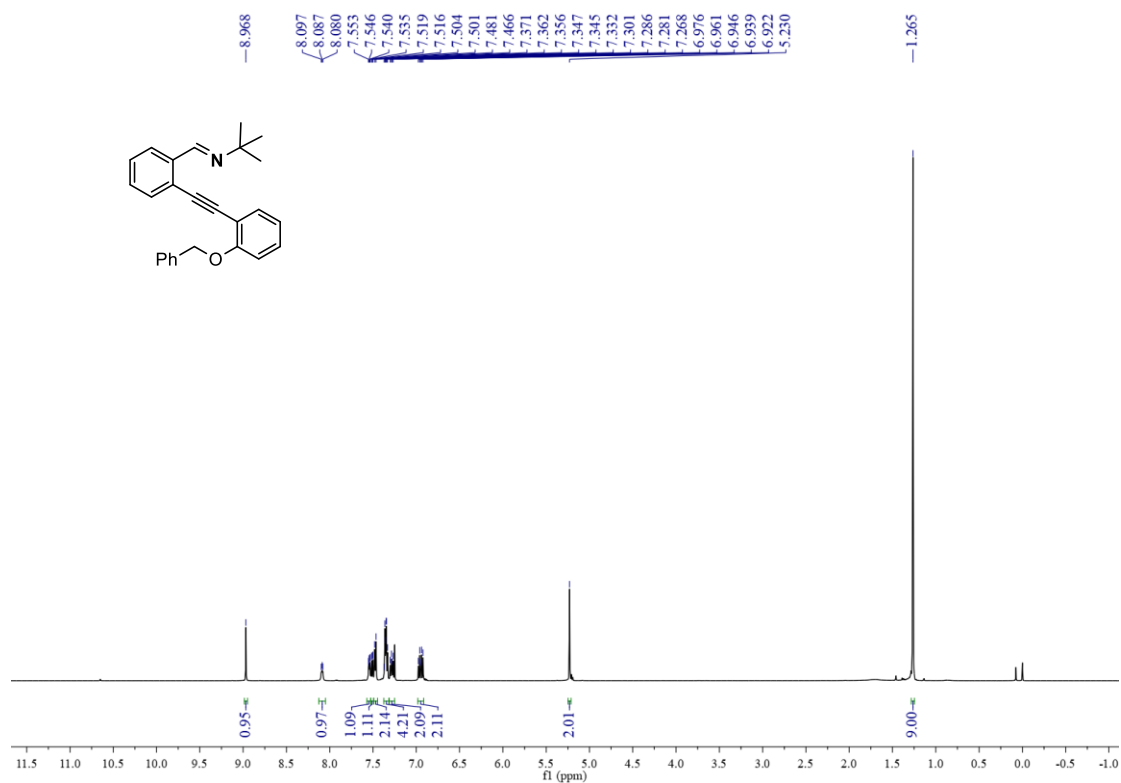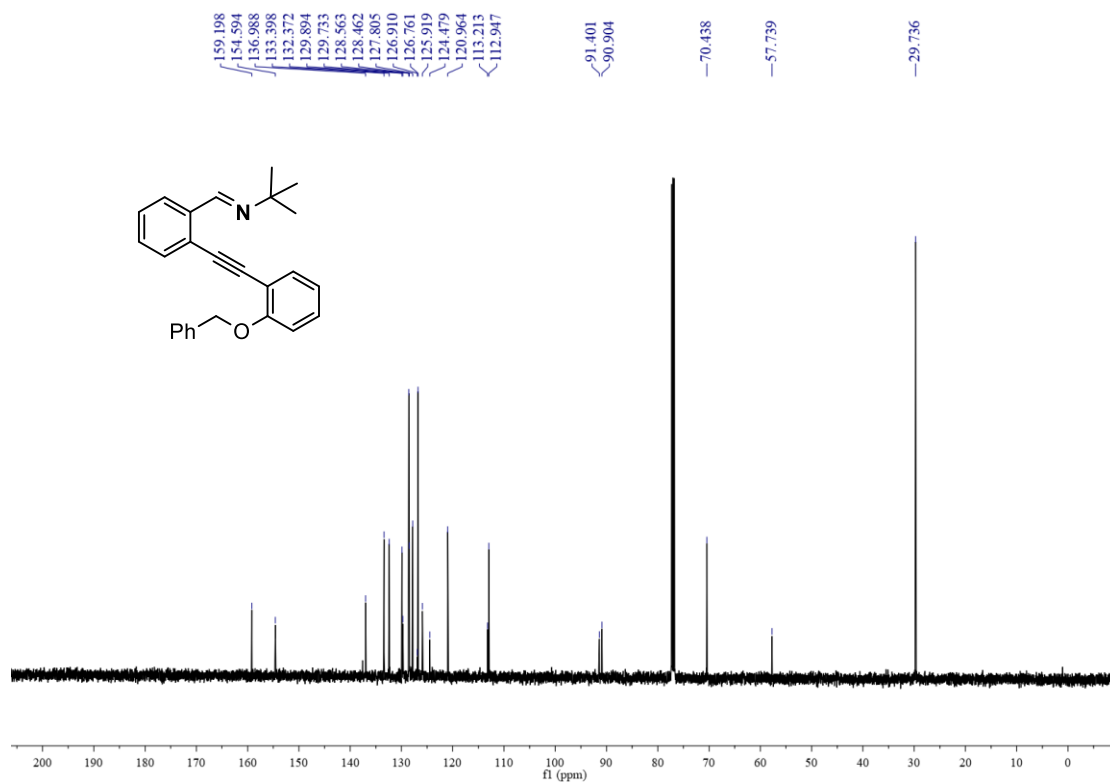

**(E)-1-((2-((2-(benzyloxy)phenyl)ethynyl)phenyl)diazenyl)piperidine**

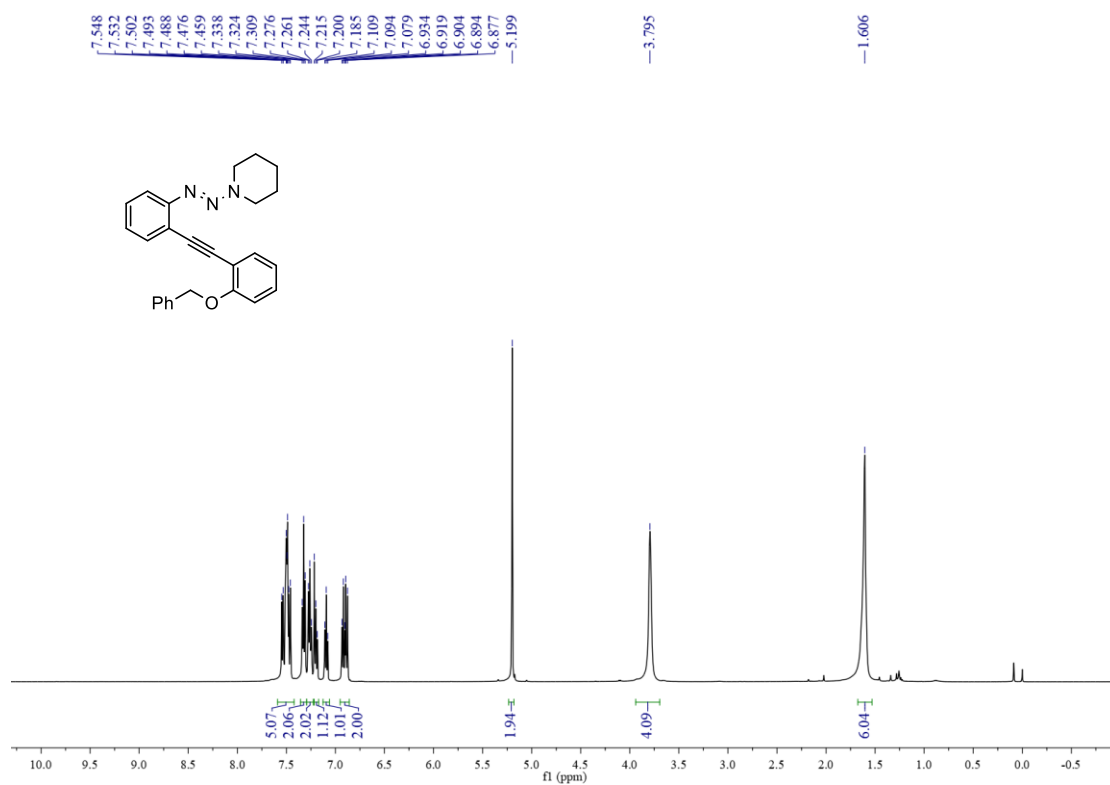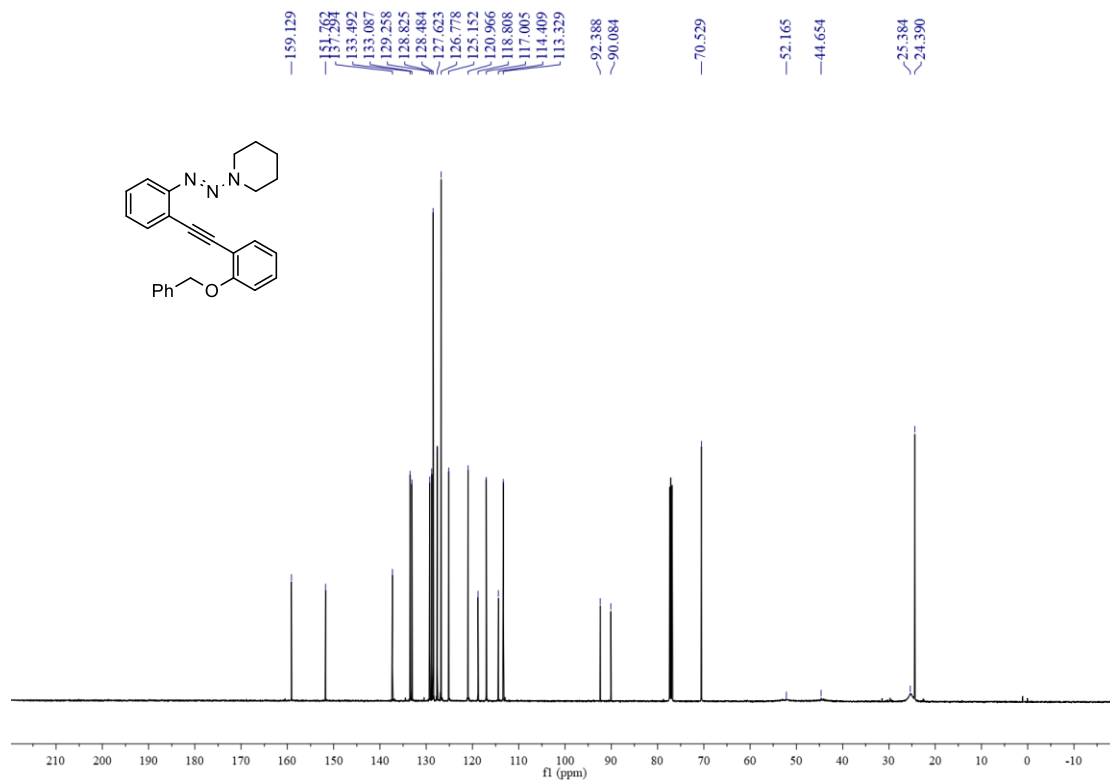

**3-(2-(benzyloxy)phenyl)isoquinoline**

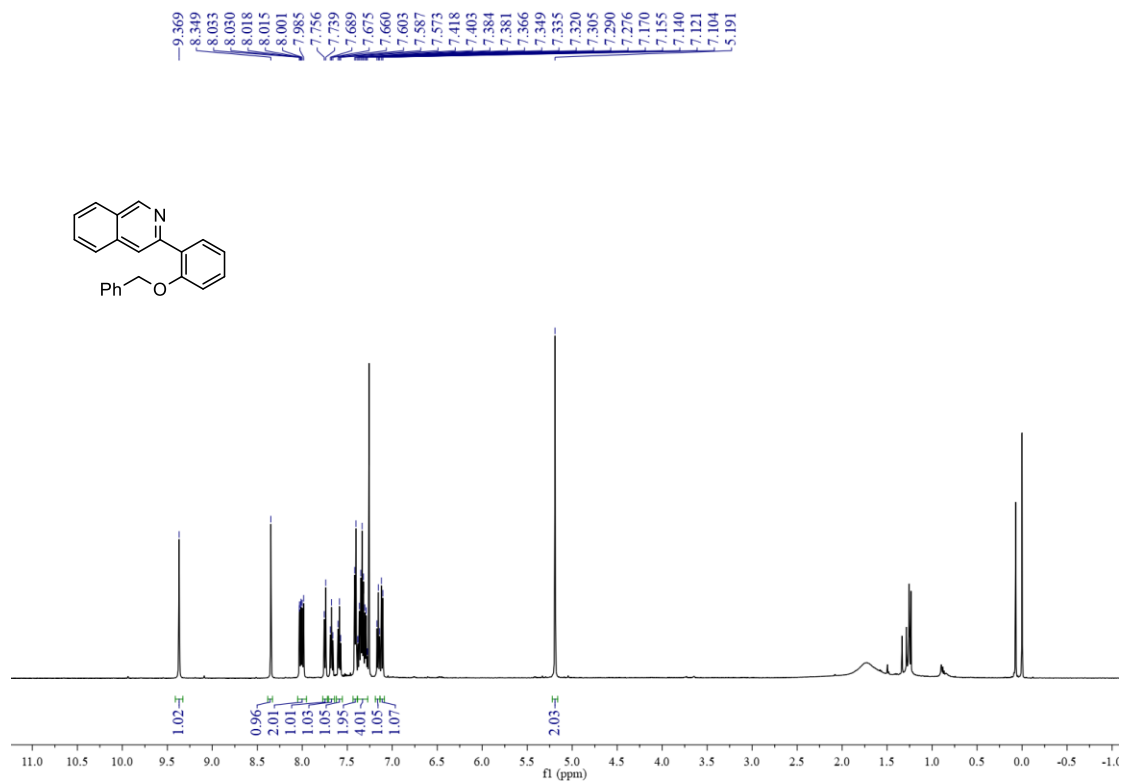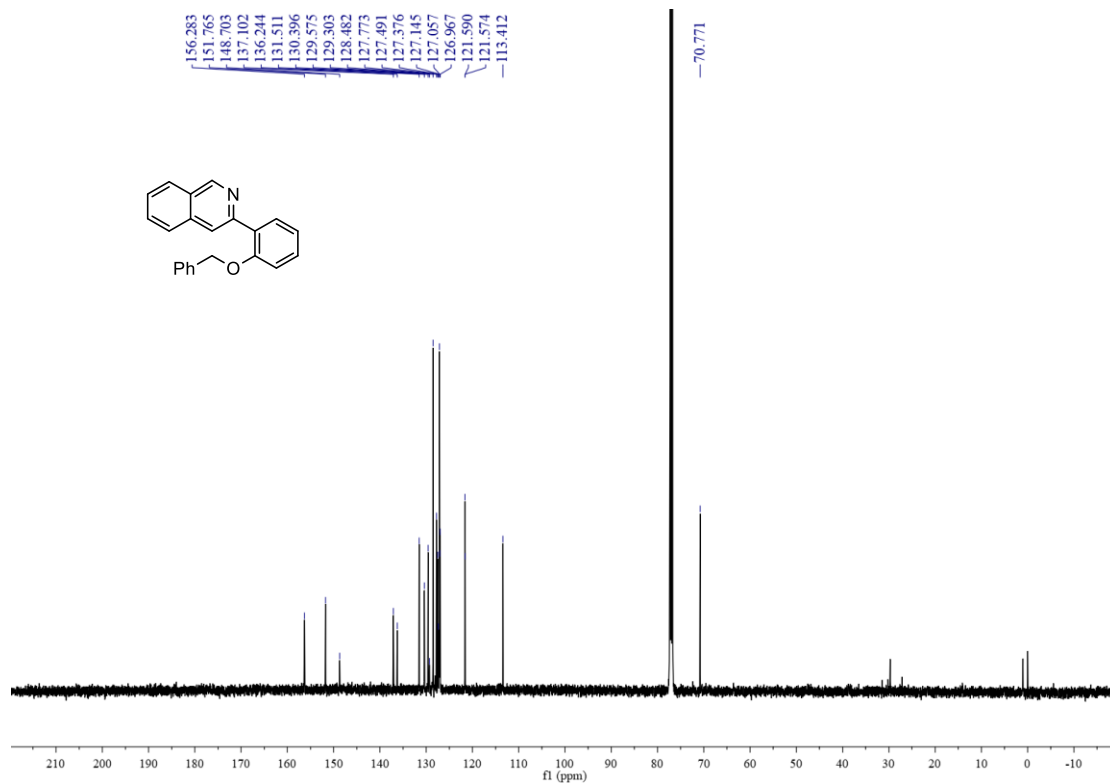

3-(2-phenyl-2,3-dihydrobenzofuran-3-yl)-2-(piperidin-1-yl)-2H-indazole

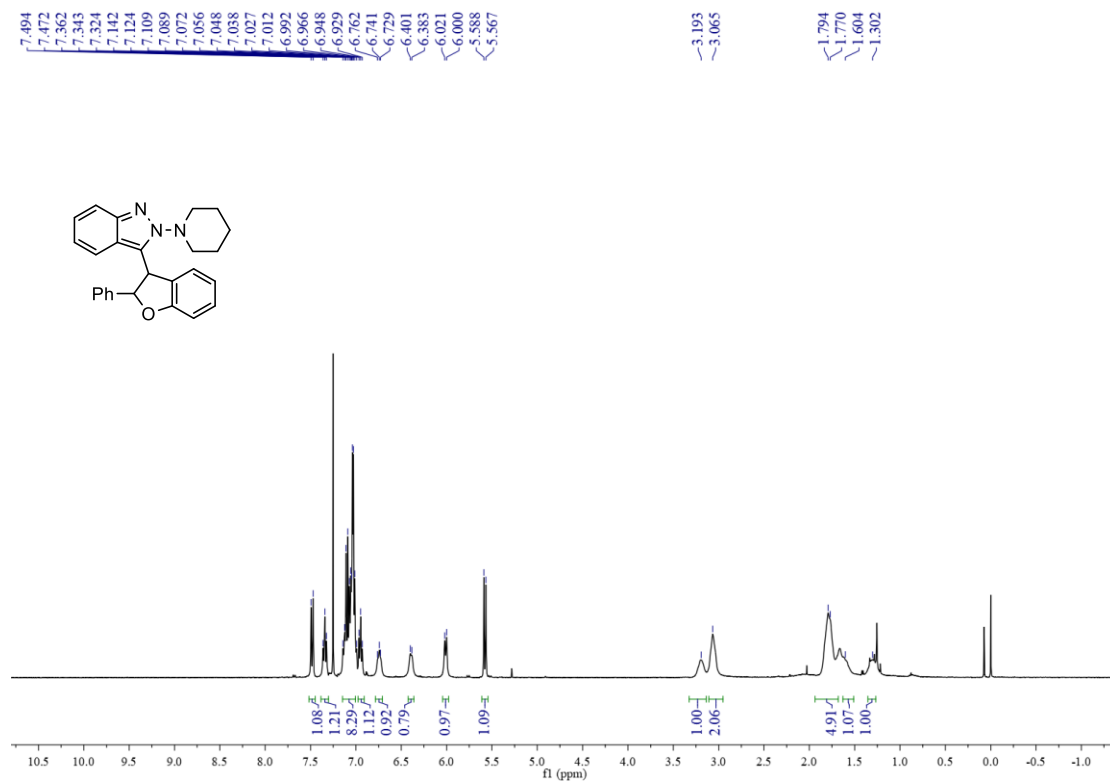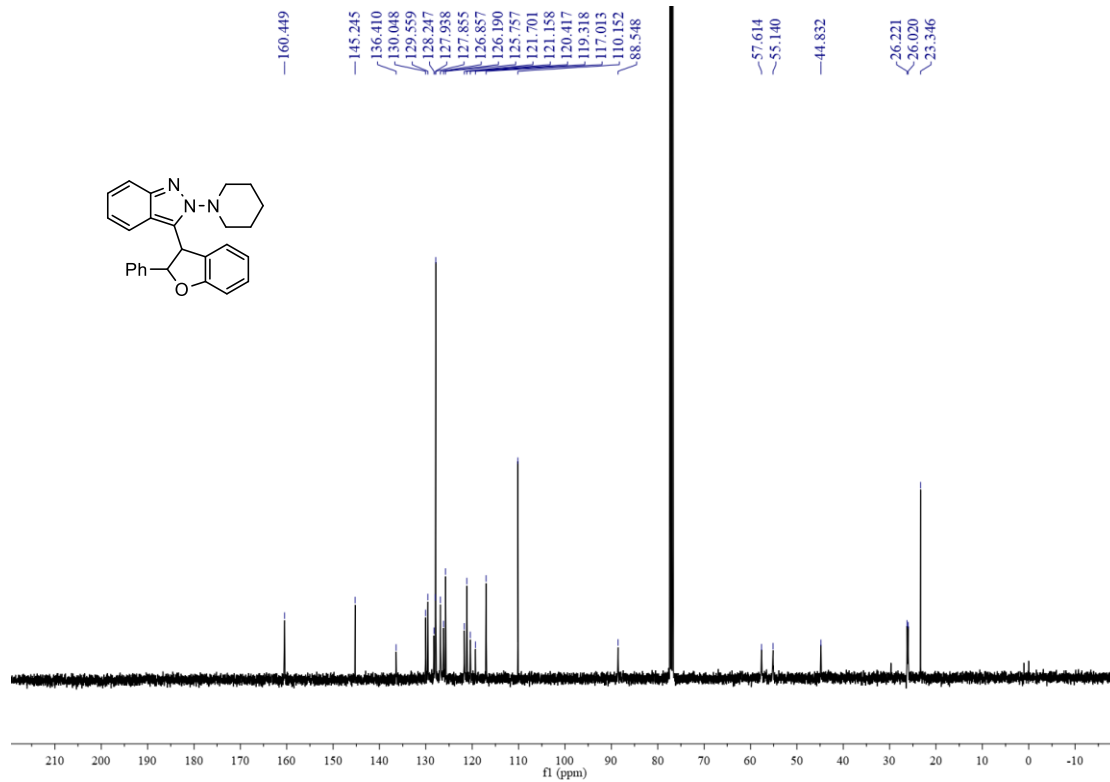

*1-(benzyloxy)-2-(phenylethynyl)benzene*

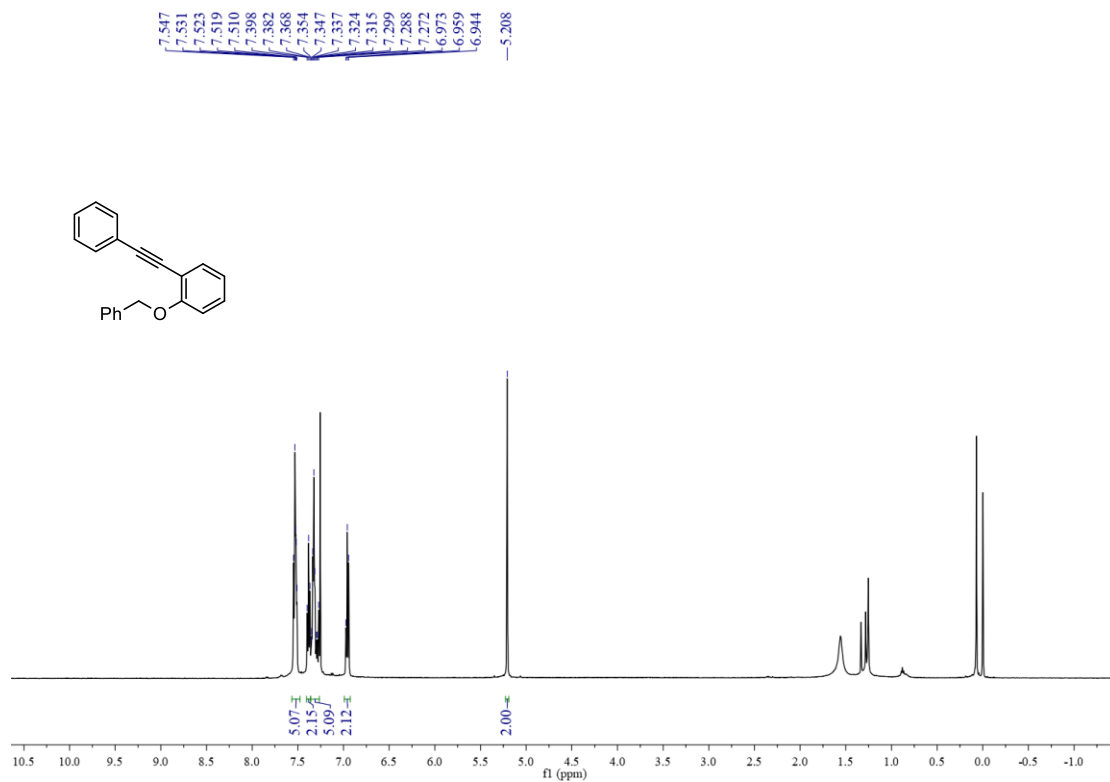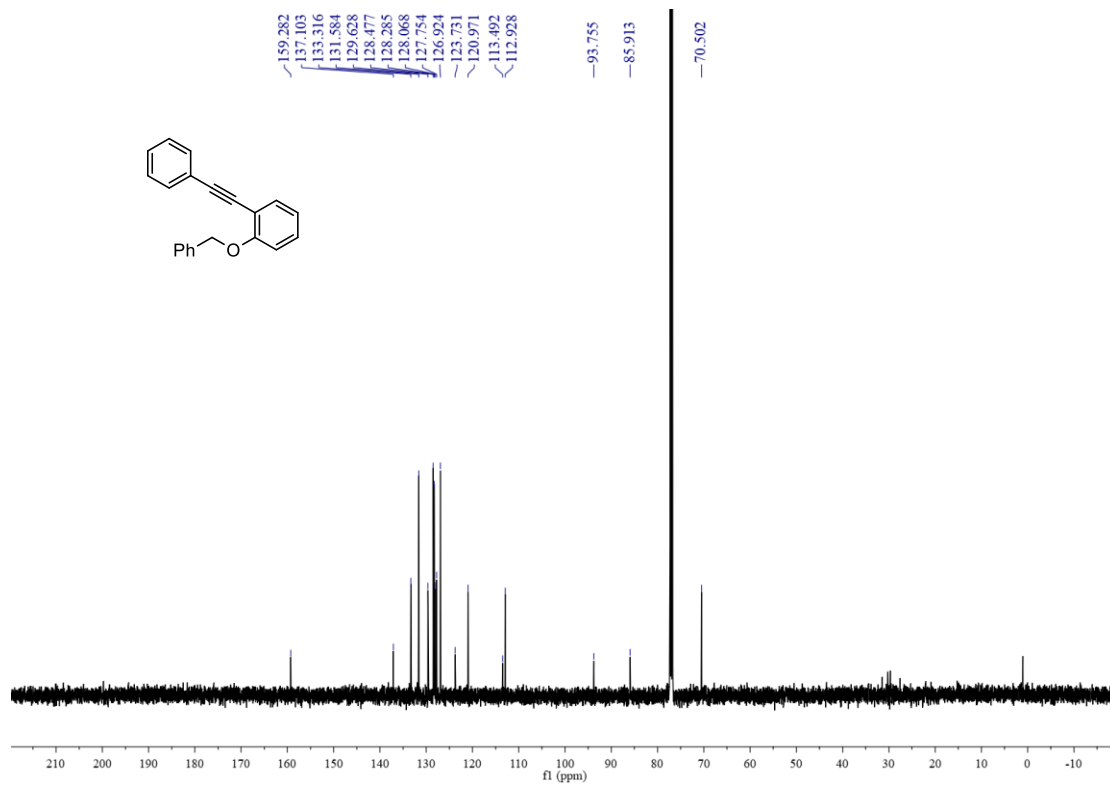



**2-(4-bromophenyl)-3-((2R,3R)-2-phenyl-2,3-dihydrobenzofuran-3-yl)-2H-indazole (2a)**

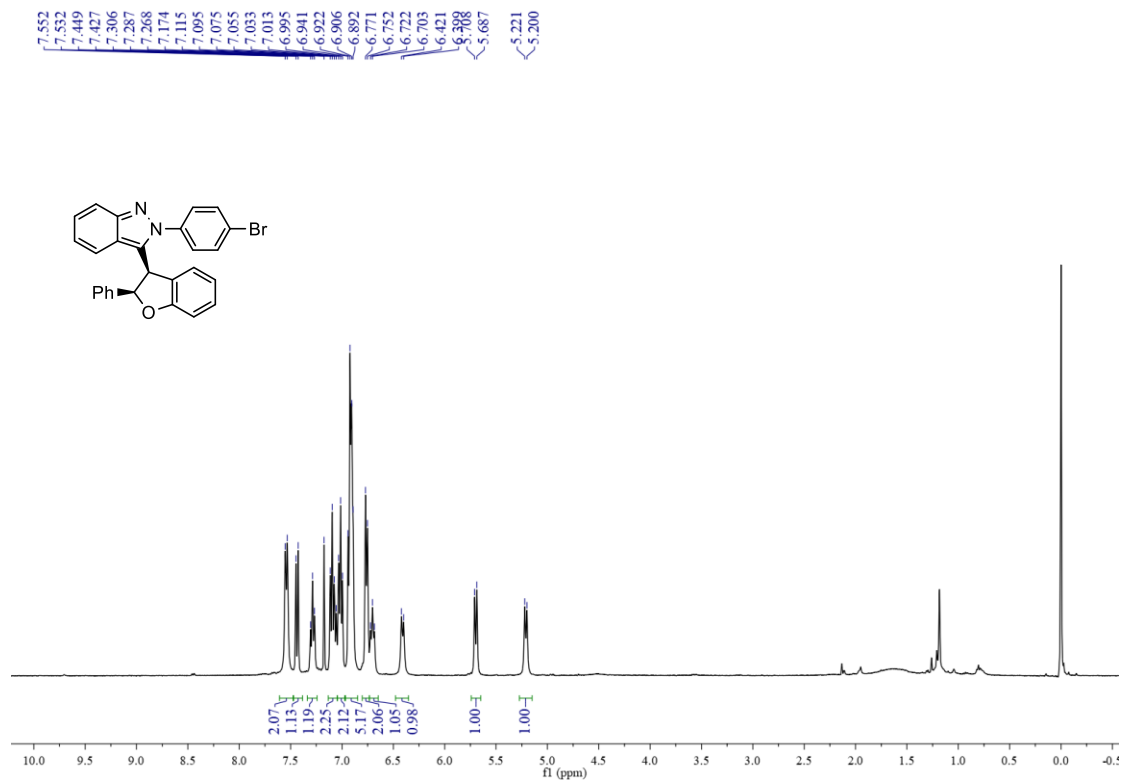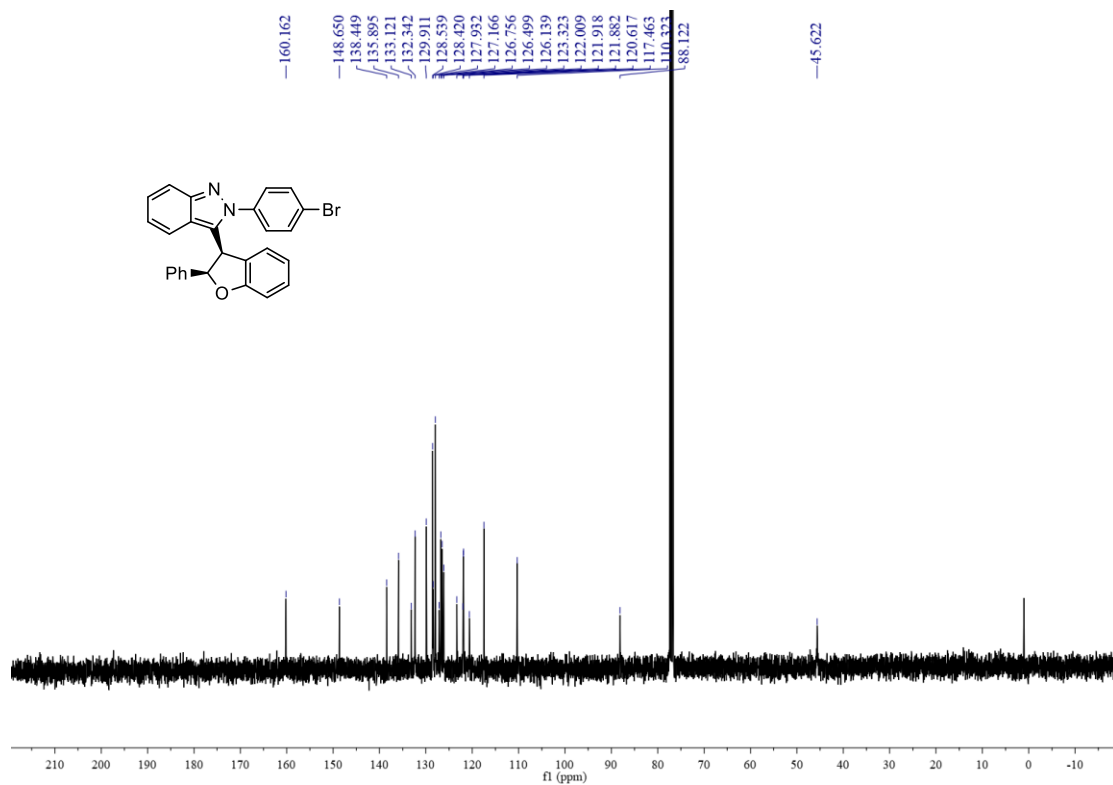

**2-(4-bromophenyl)-3-((2R,3R)-2-(p-tolyl)-2,3-dihydrobenzofuran-3-yl)-2H-indazole (2b)**

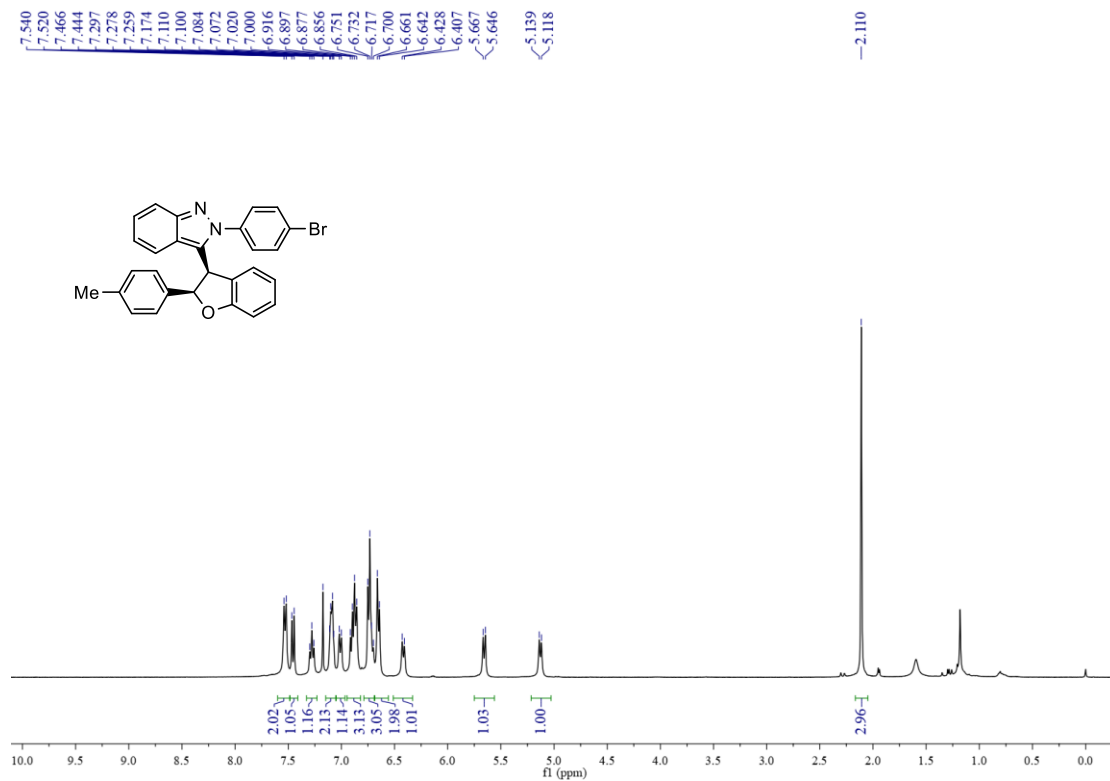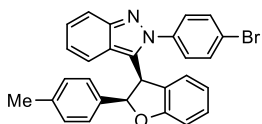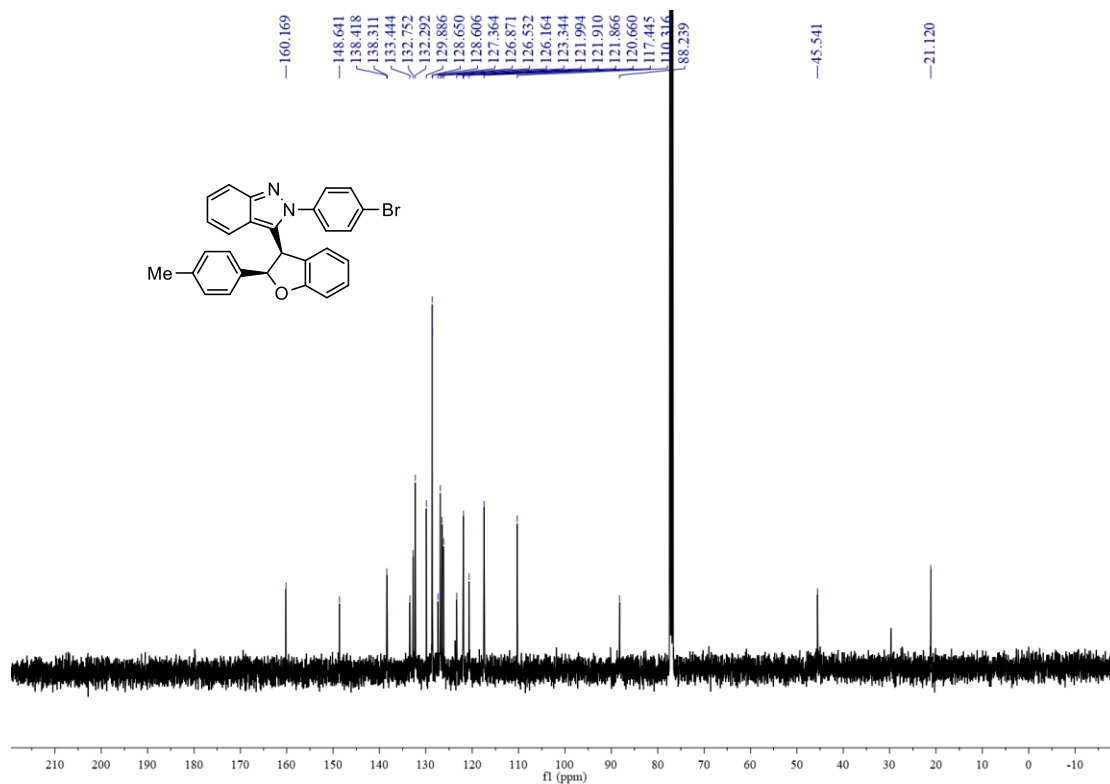

**2-(4-bromophenyl)-3-((2R,3R)-2-(4-methoxyphenyl)-2,3-dihydrobenzofuran-3-yl)-2H-indazole (2c)**

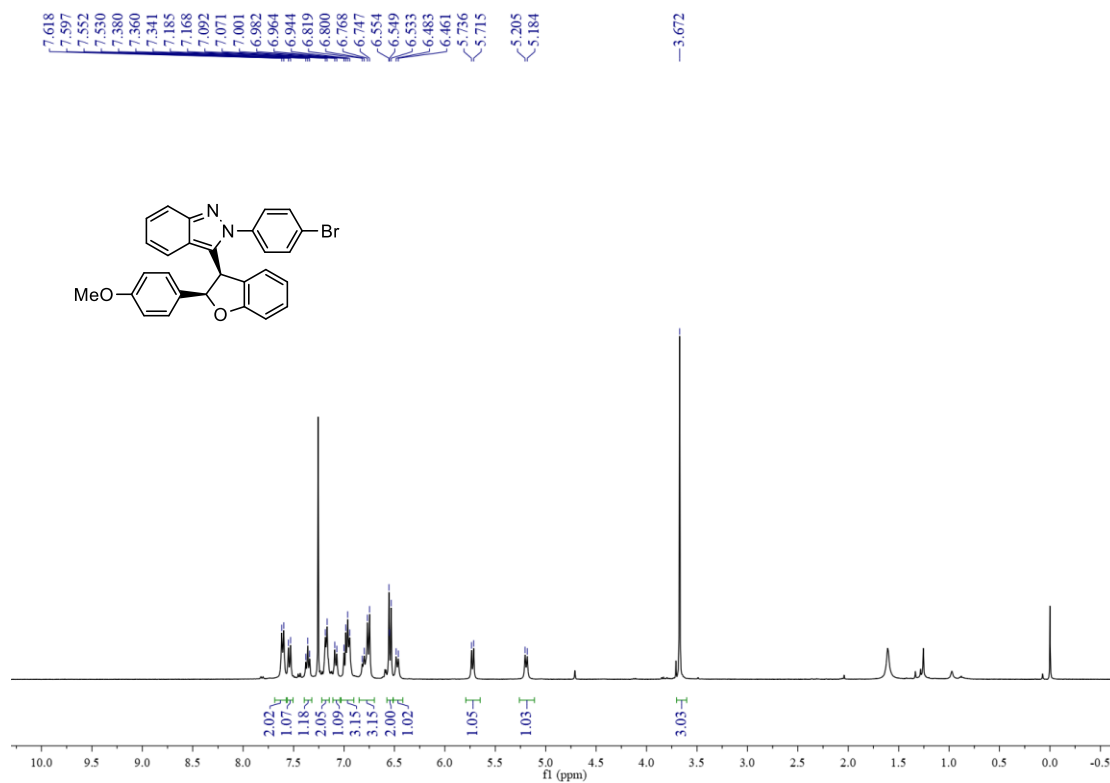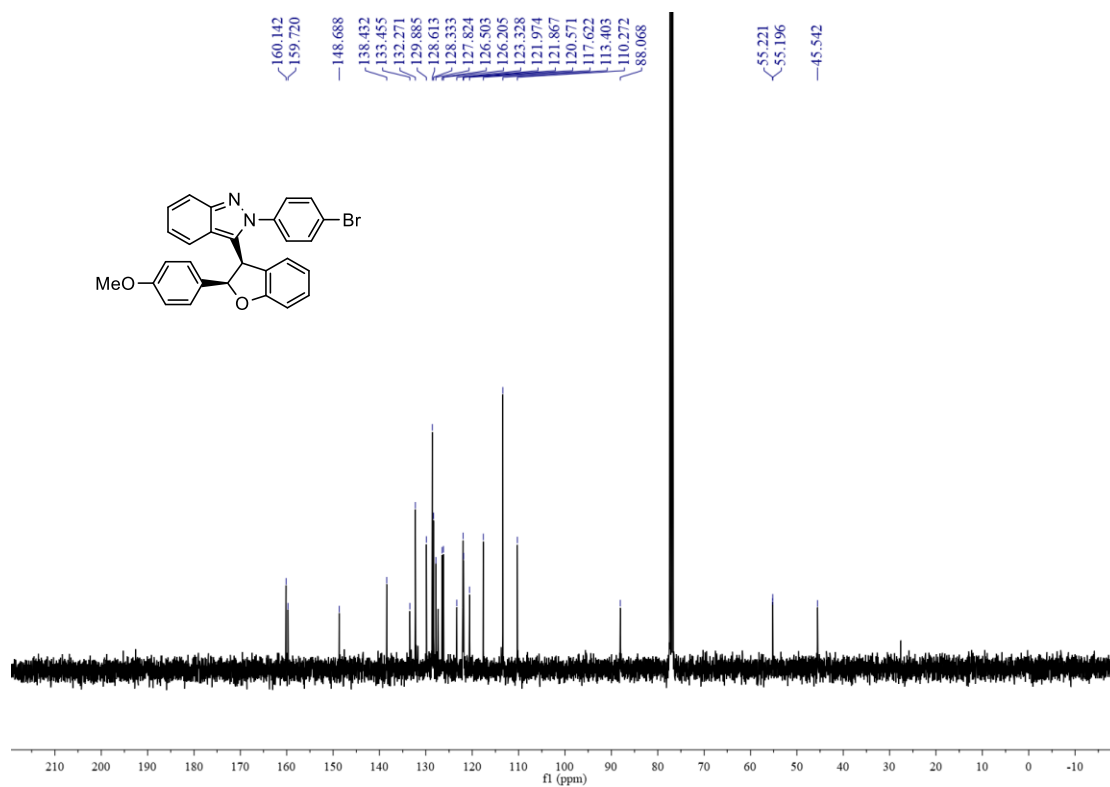

**2-(4-bromophenyl)-3-((2R,3R)-2-(4-fluorophenyl)-2,3-dihydrobenzofuran-3-yl)-2H-indazole (2d)**

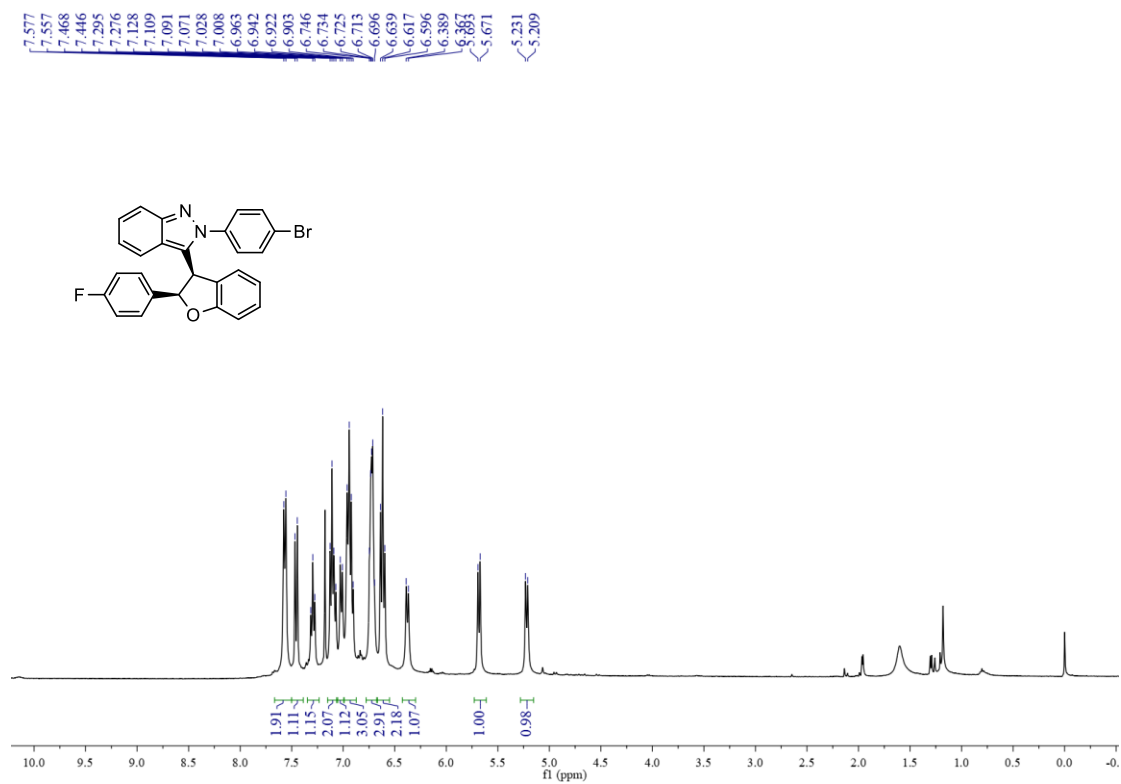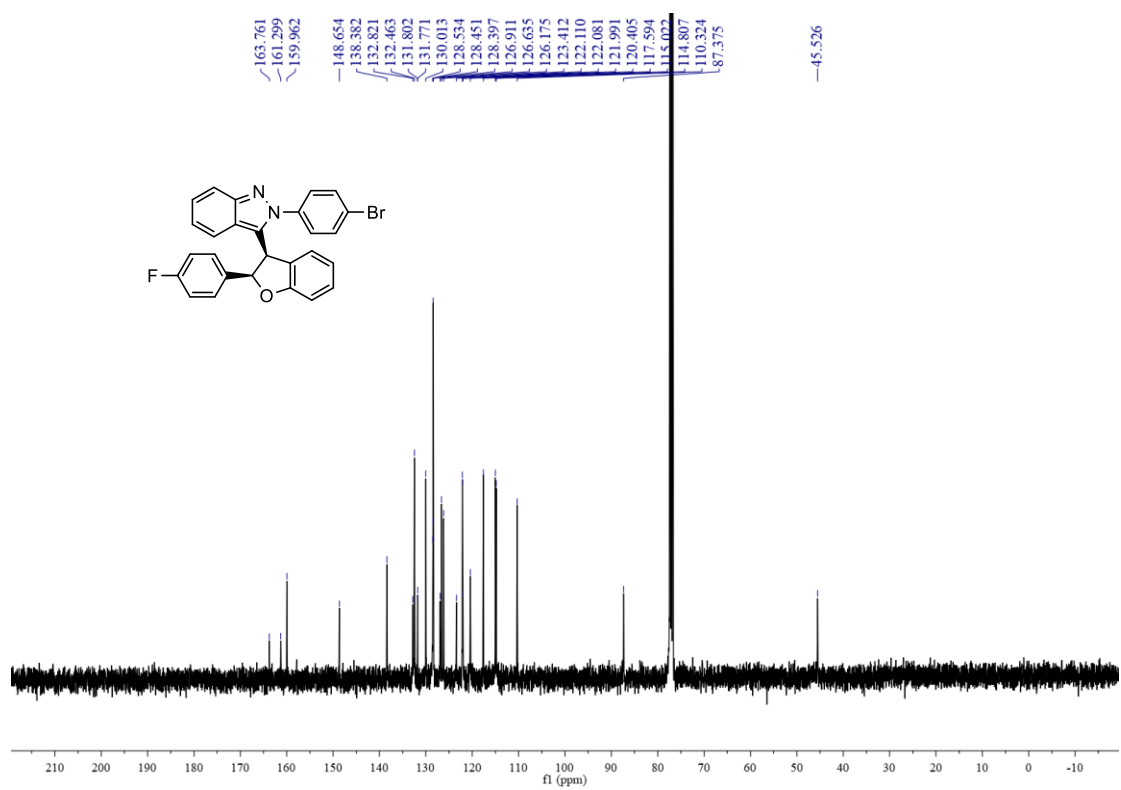

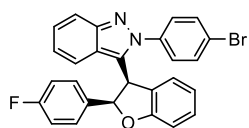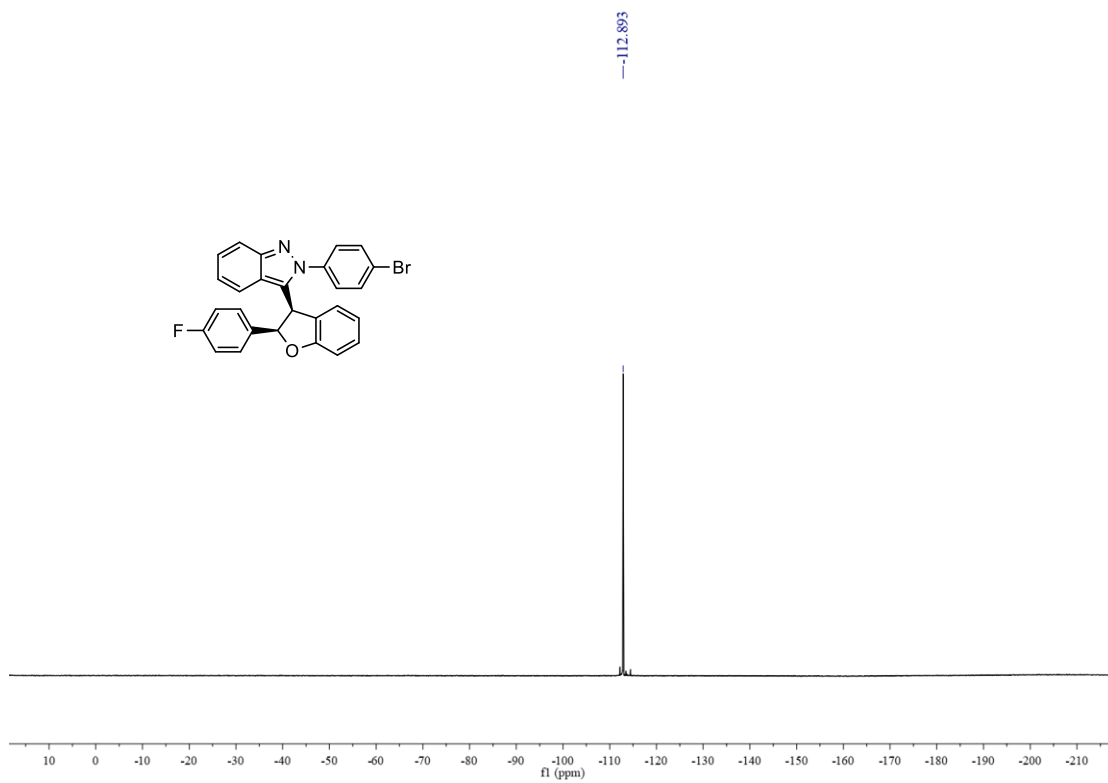

**2-(4-bromophenyl)-3-((2R,3R)-2-(4-chlorophenyl)-2,3-dihydrobenzofuran-3-yl)-2H-indazole (2e)**

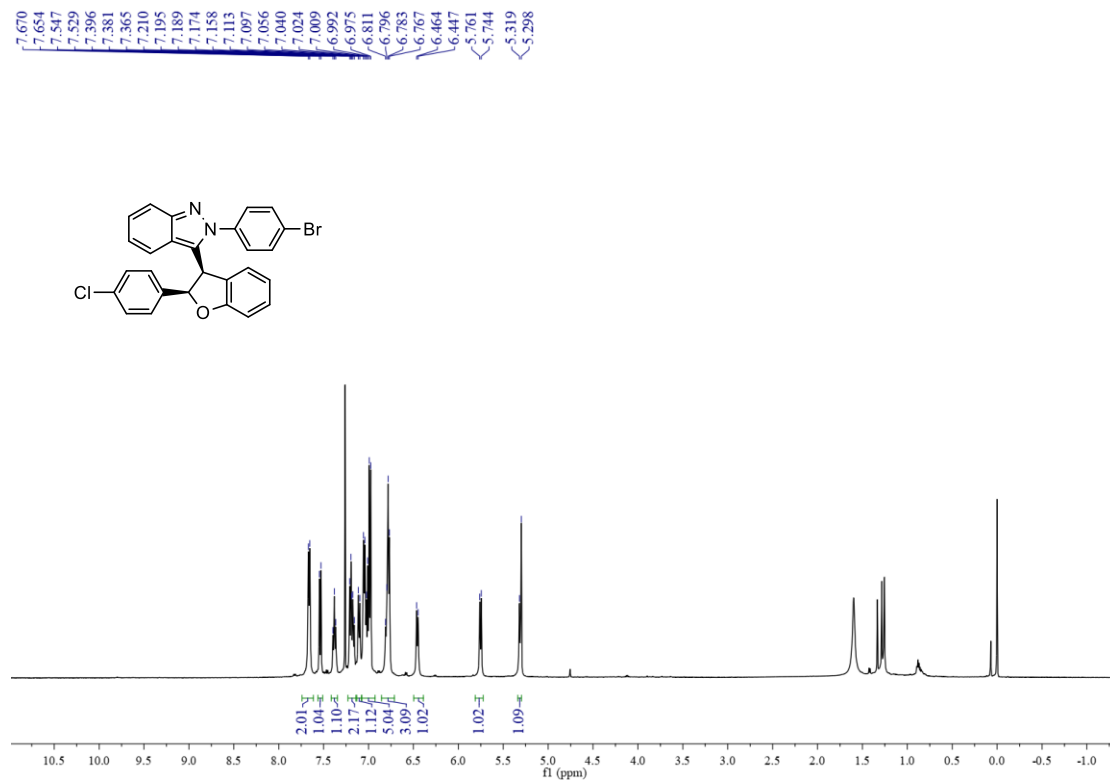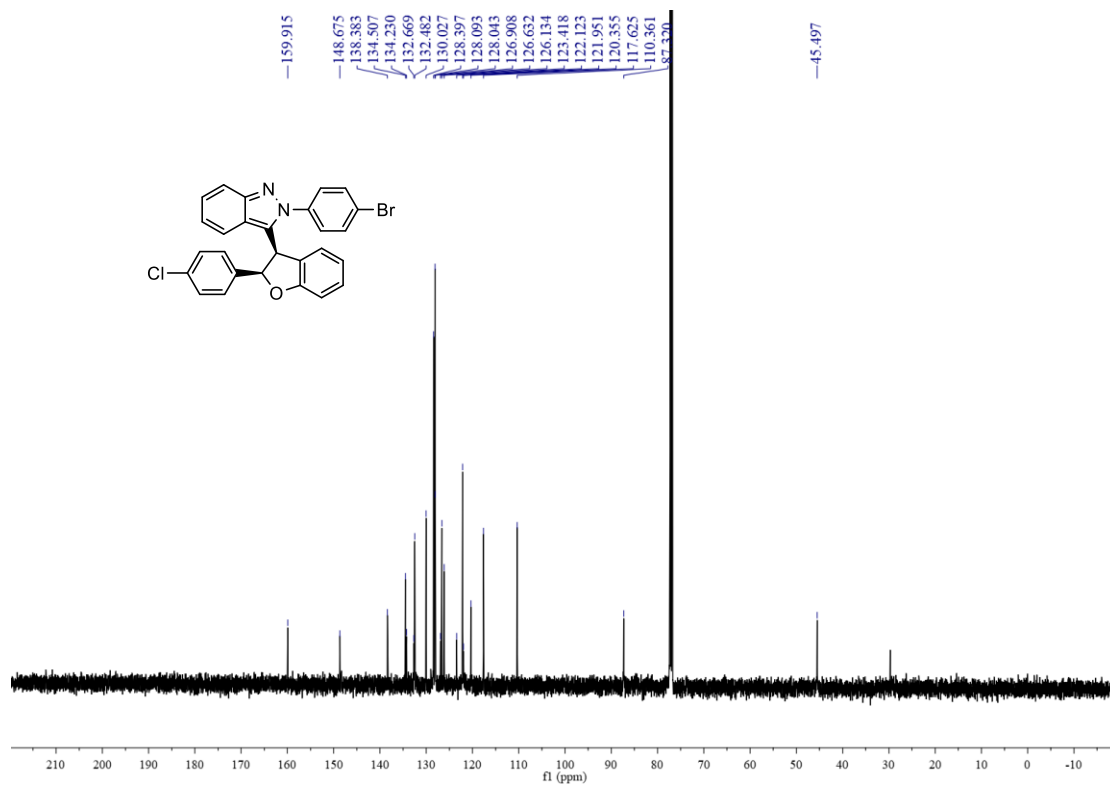

**2-(4-bromophenyl)-3-((2R,3R)-2-(4-bromophenyl)-2,3-dihydrobenzofuran-3-yl)-2H-indazole (2f)**

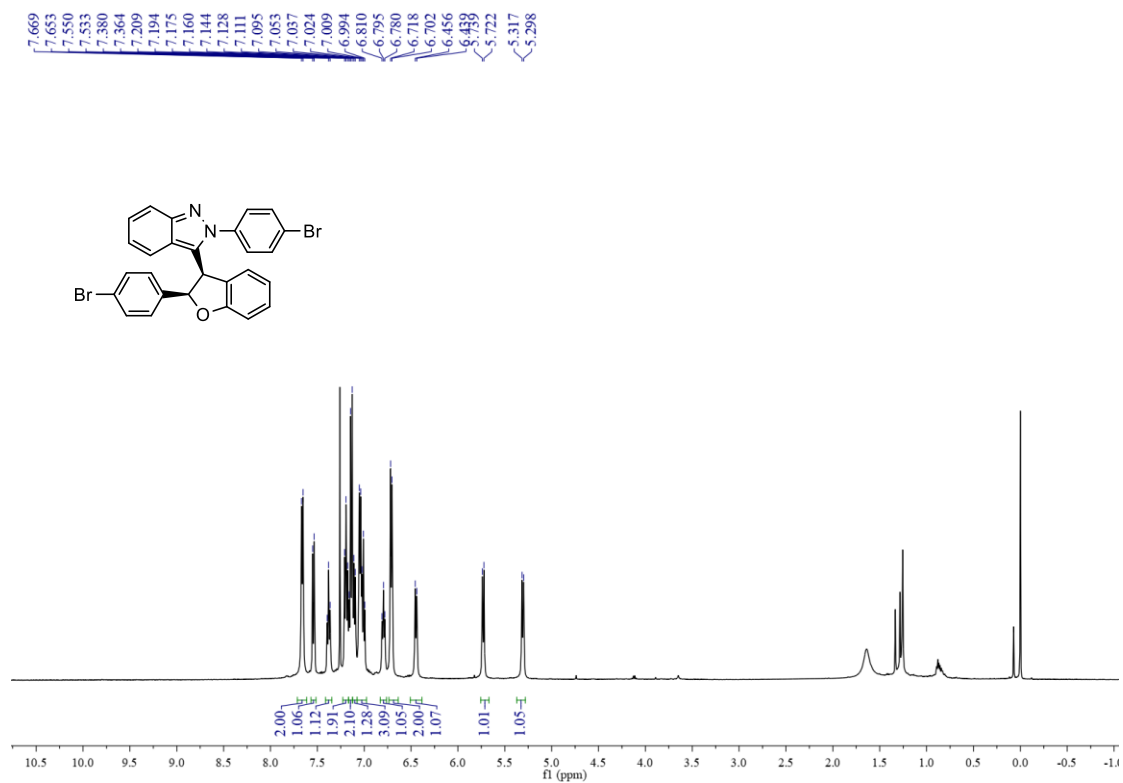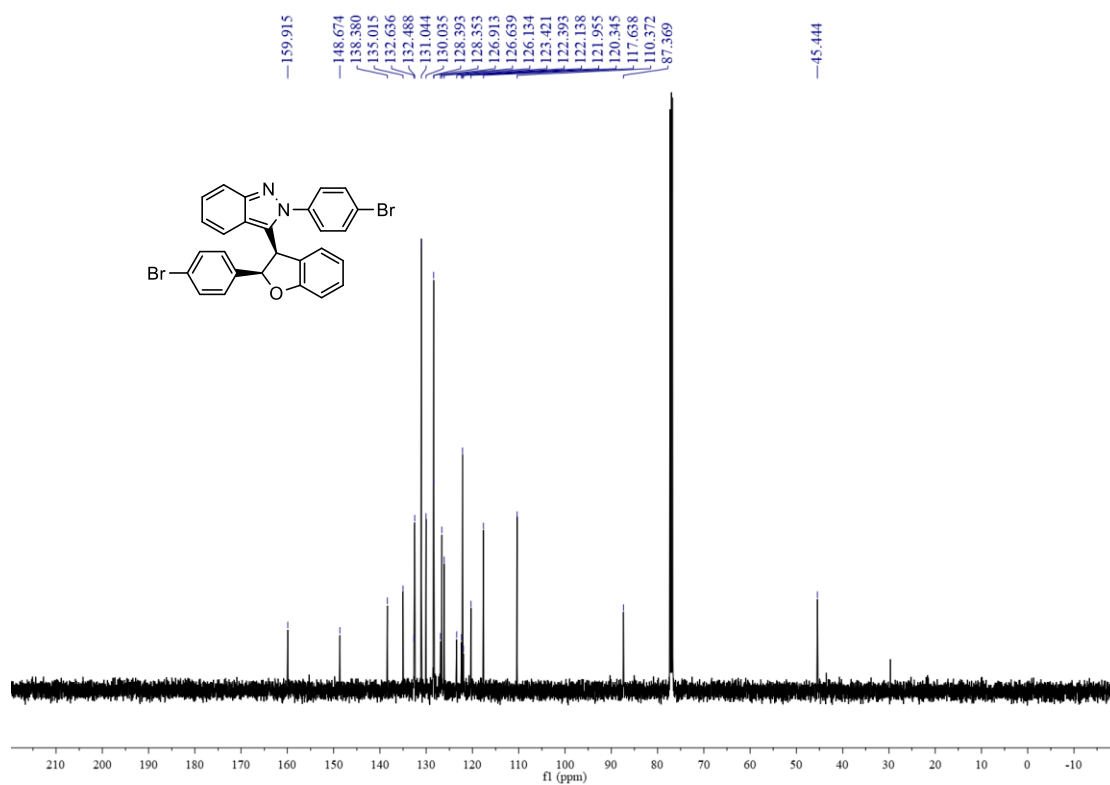

**2-(4-bromophenyl)-3-((2R,3R)-2-(4-(trifluoromethyl)phenyl)-2,3-dihydrobenzofuran-3-yl)-2H-indazole (2g)**

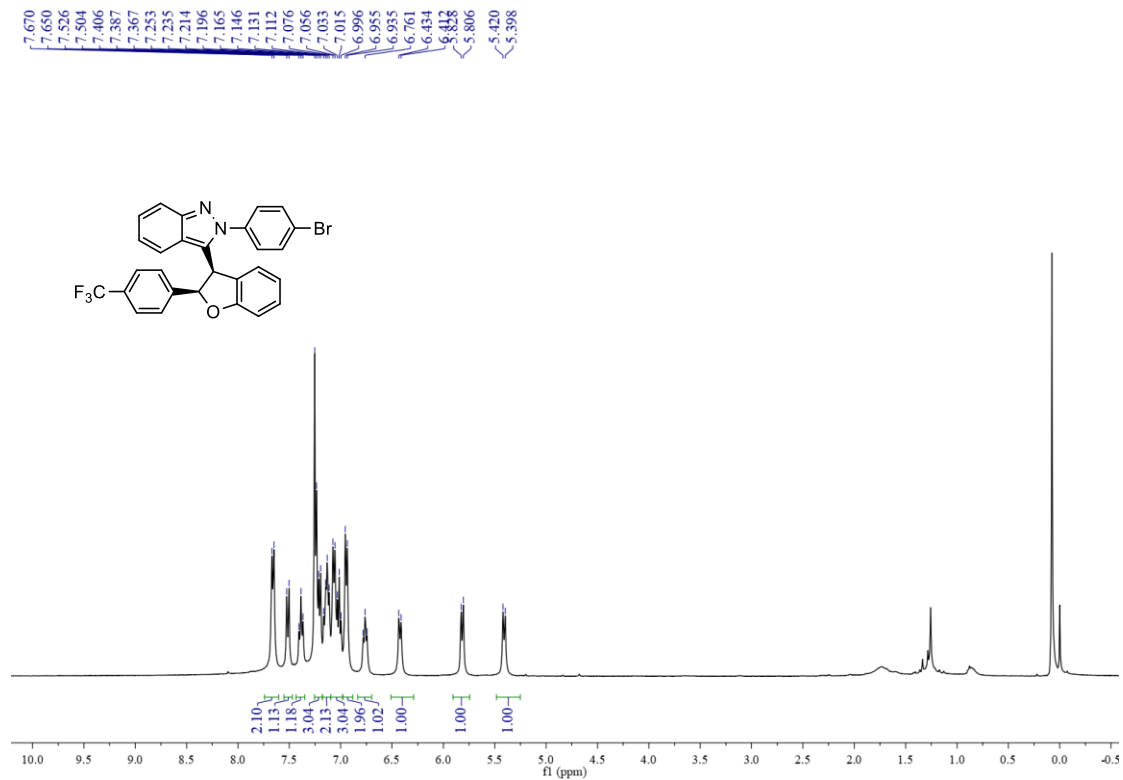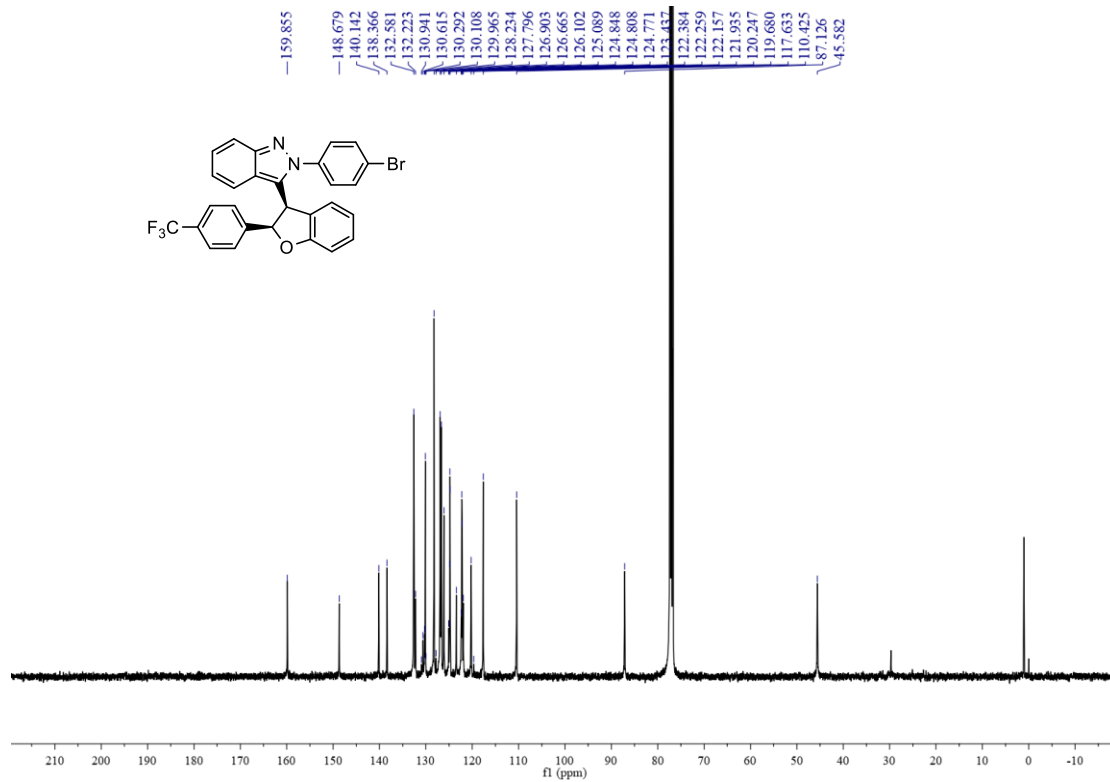



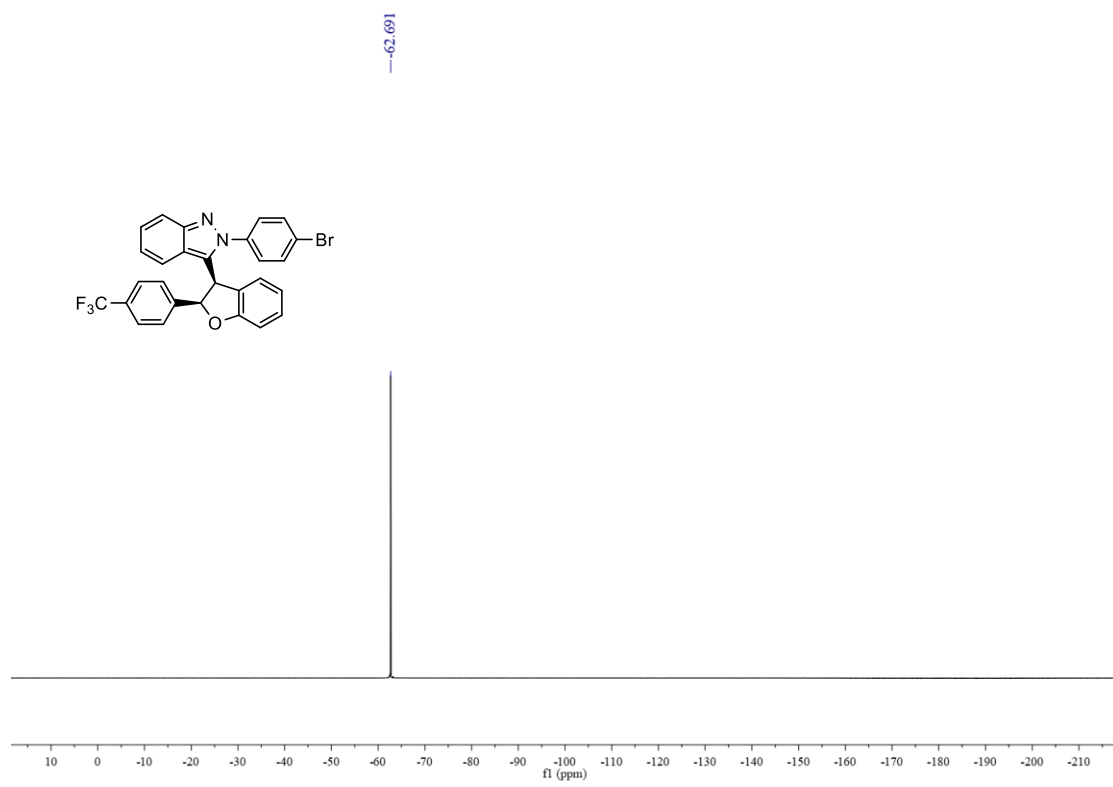

4-((2R,3R)-3-(2-(4-bromophenyl)-2H-indazol-3-yl)-2,3-dihydrobenzofuran-2-yl)benzonitrile (2h)

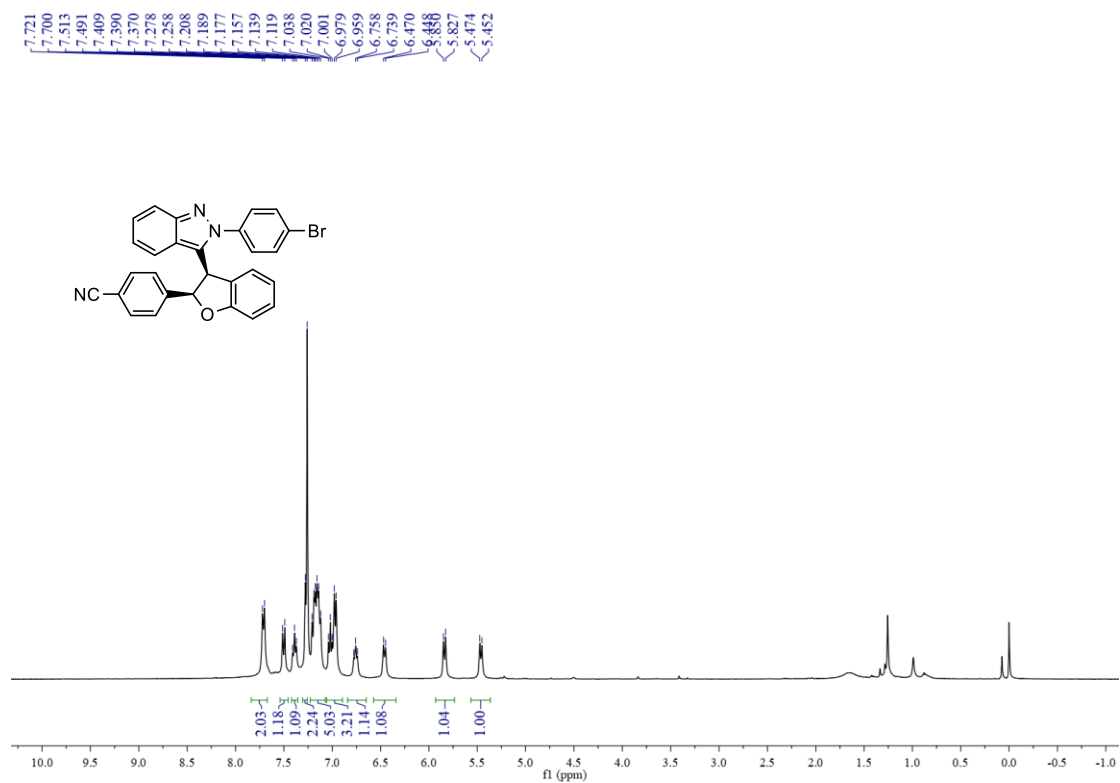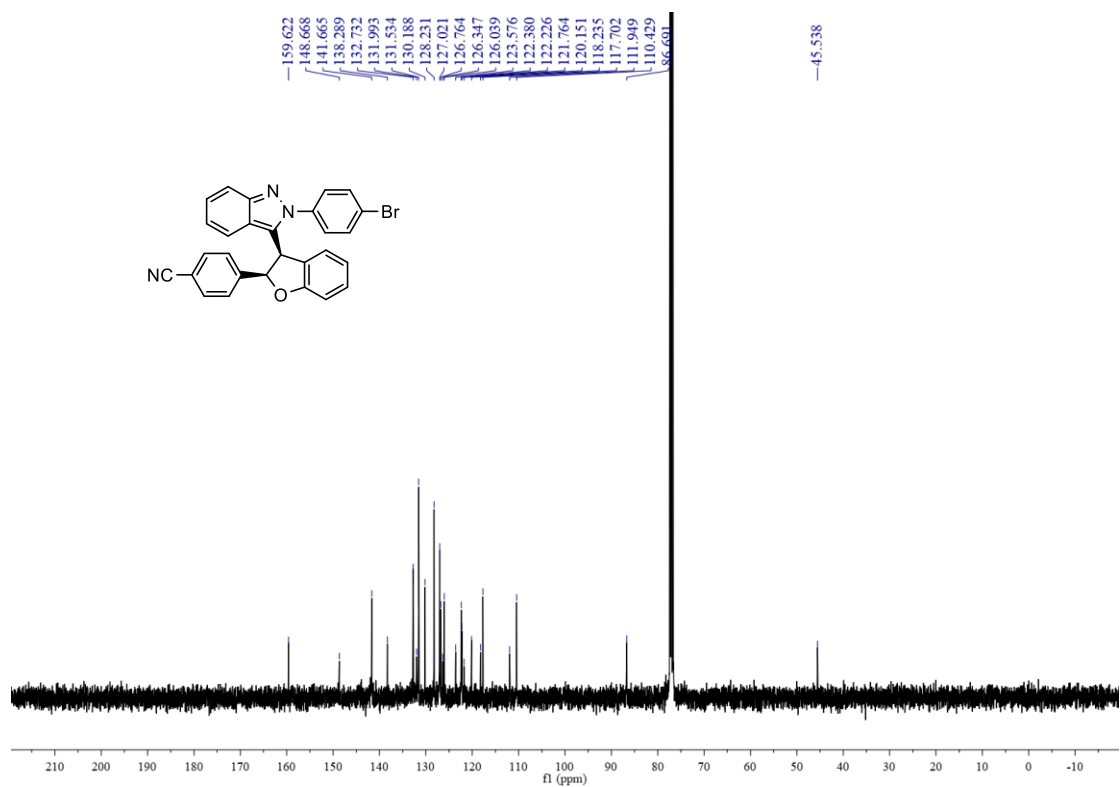

**2-(4-bromophenyl)-3-((2R,3R)-2-(3-bromophenyl)-2,3-dihydrobenzofuran-3-yl)-2H-indazole (2i)**

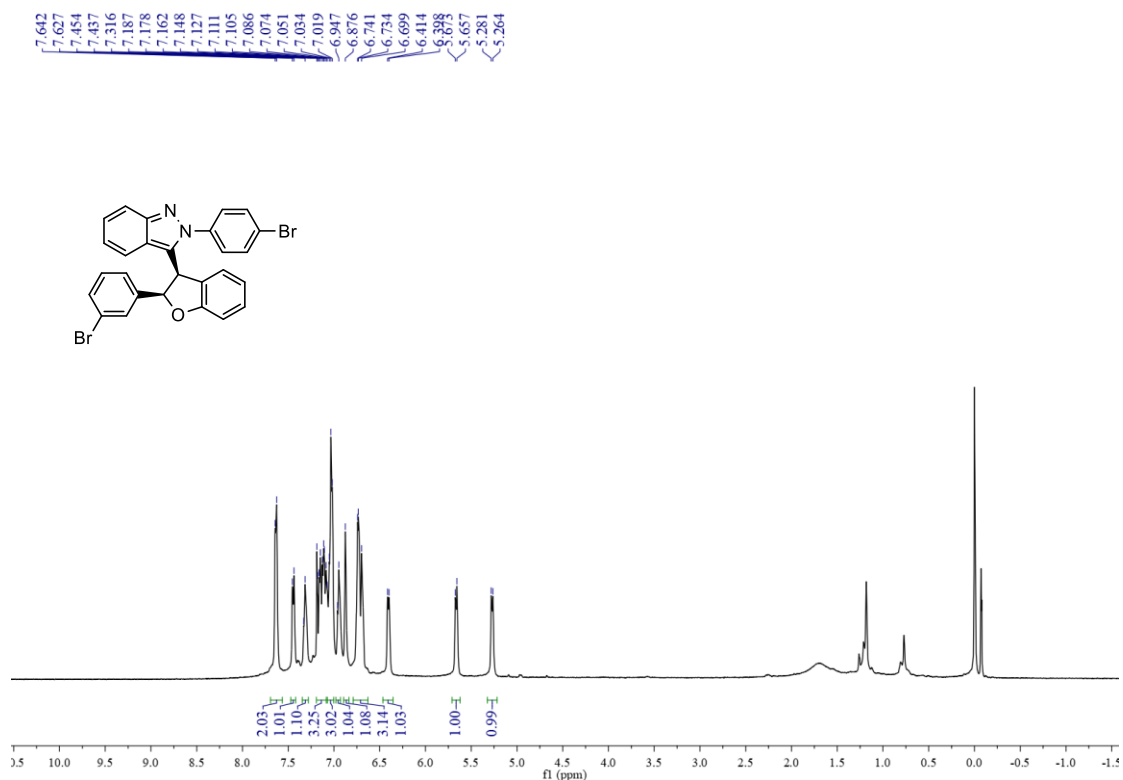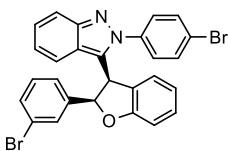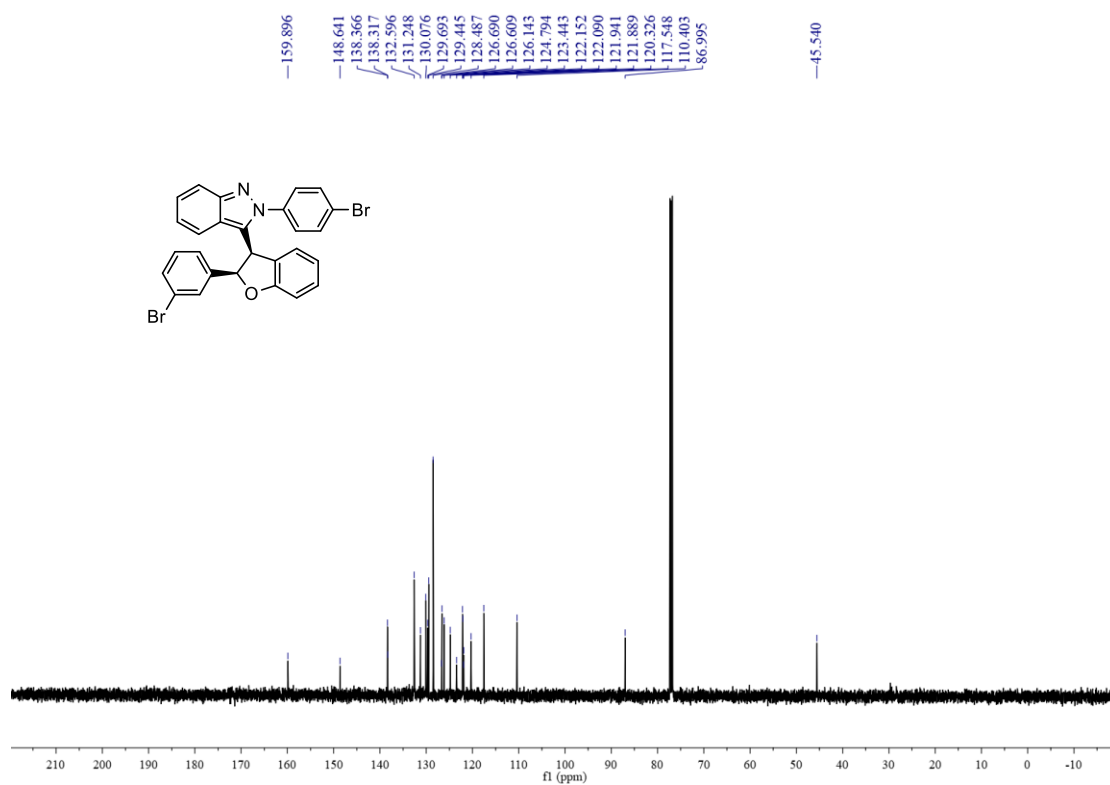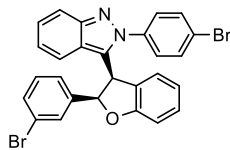

**2-(4-bromophenyl)-3-((2R,3R)-2-(2-bromophenyl)-2,3-dihydrobenzofuran-3-yl)-2H-indazole (2j)**

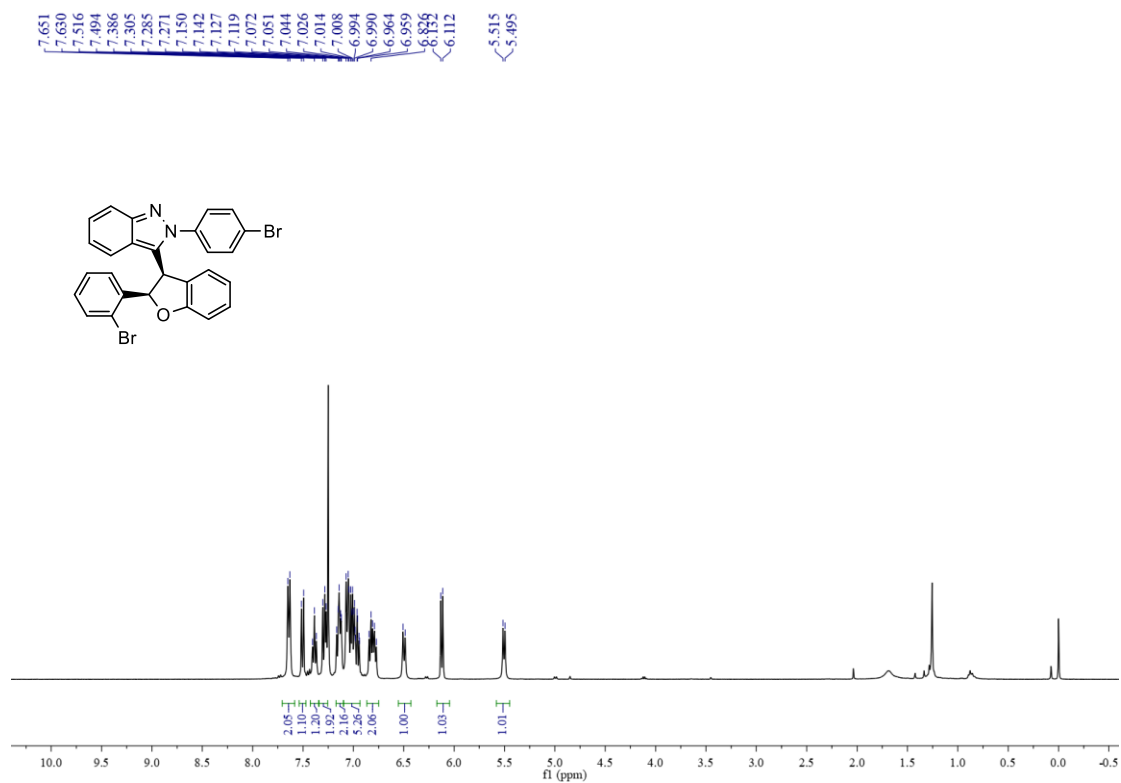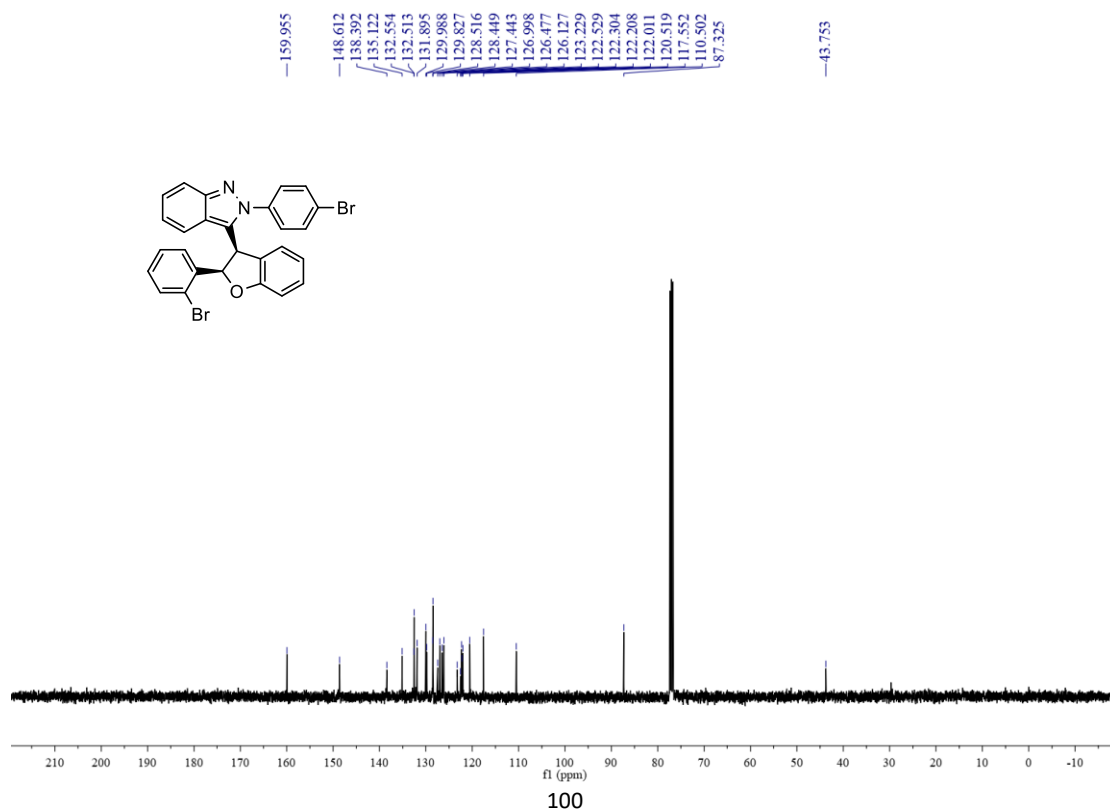

**2-(4-bromophenyl)-3-((2R,3R)-2-(2-methoxyphenyl)-2,3-dihydrobenzofuran-3-yl)-2H-indazole (2k)**

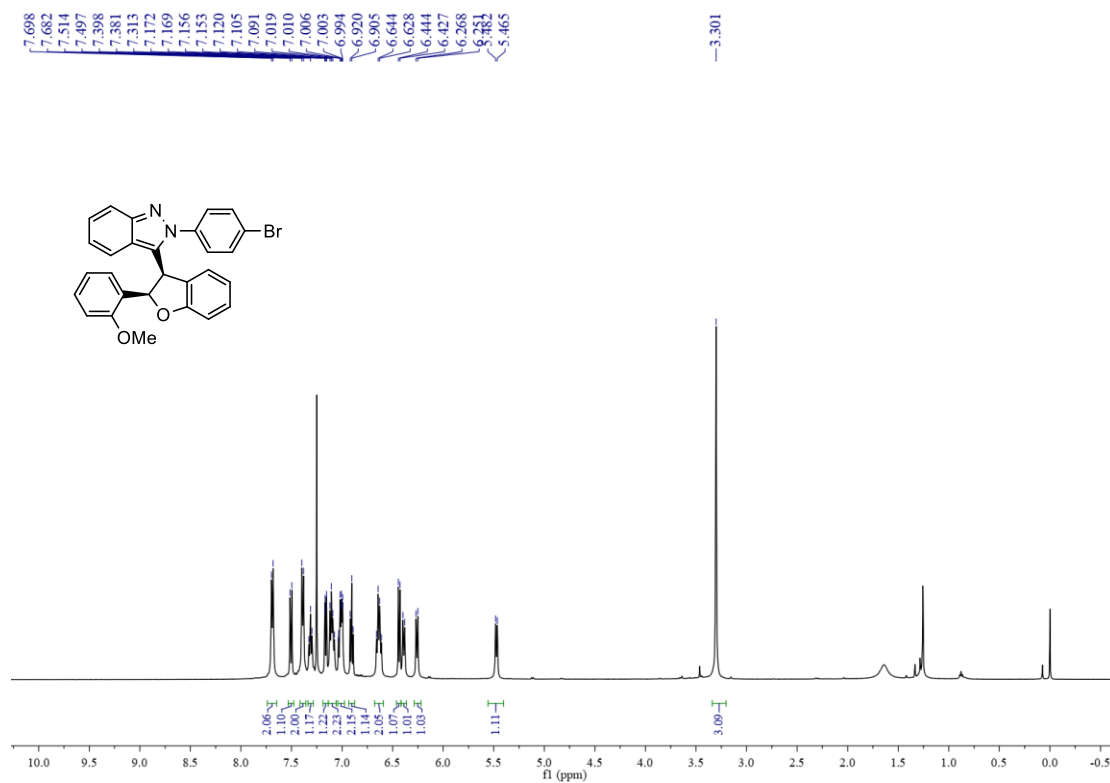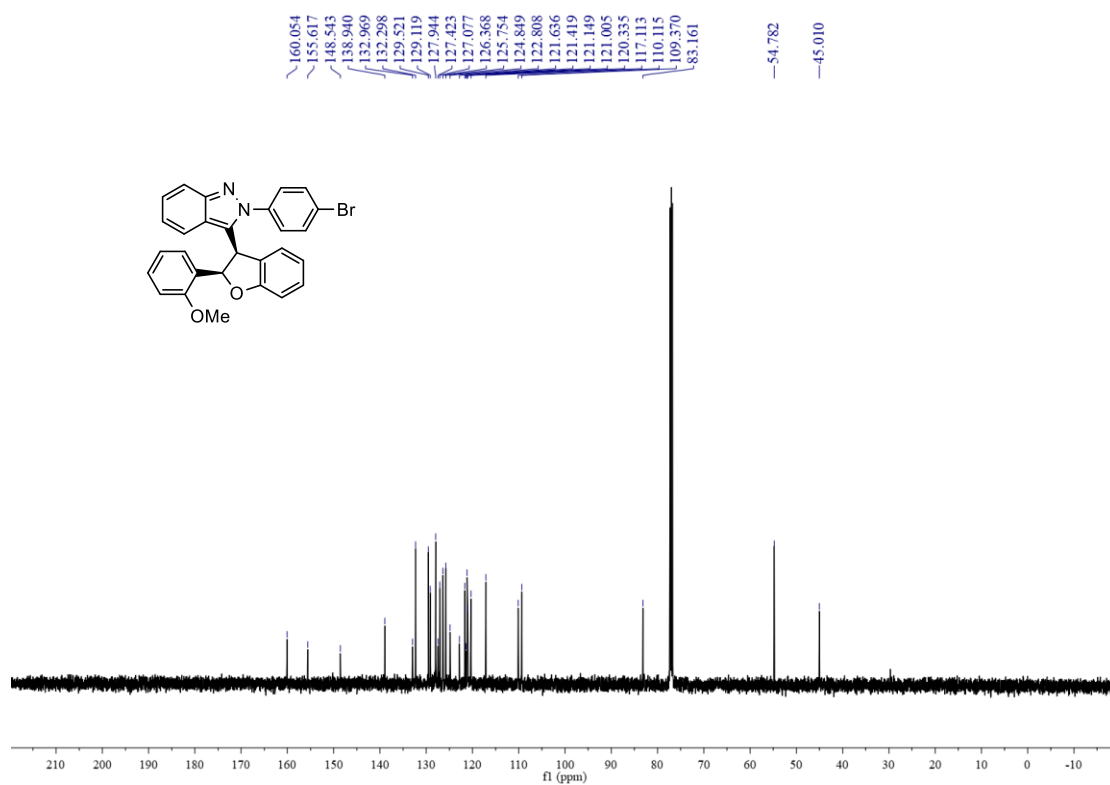

**2-(4-bromophenyl)-3-((2R,3R)-2-(naphthalen-1-yl)-2,3-dihydrobenzofuran-3-yl)-2H-indazole (2l)**

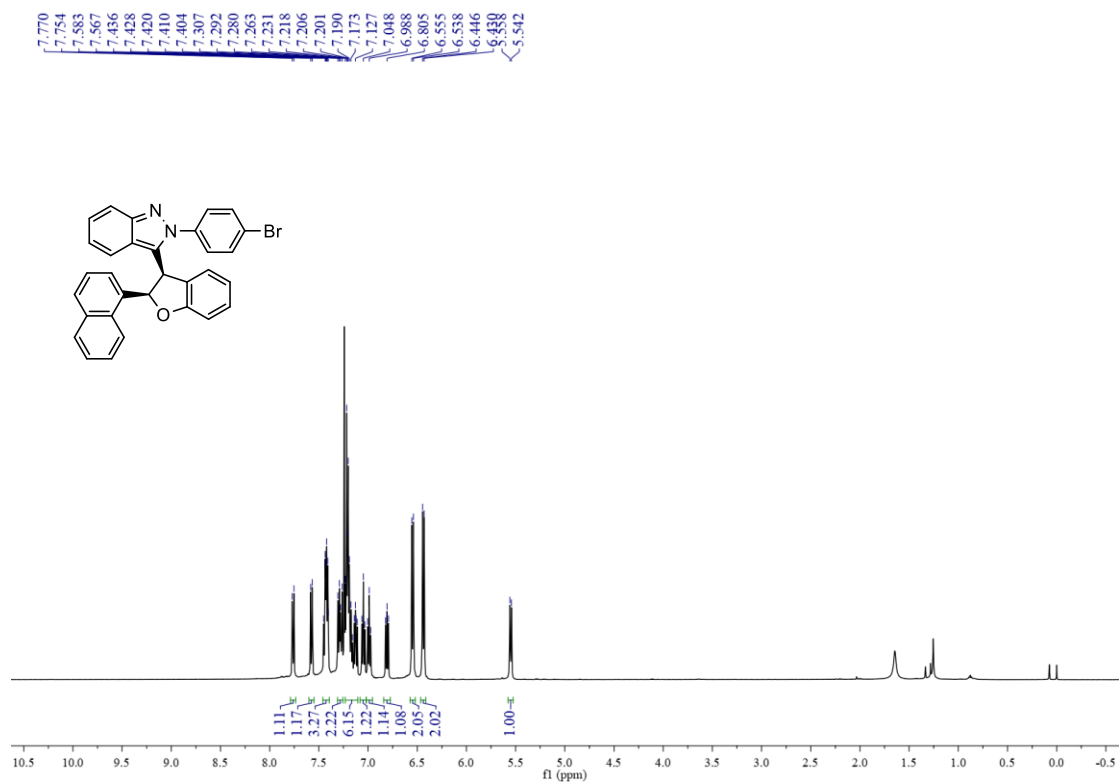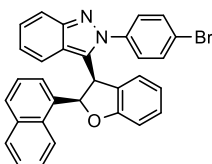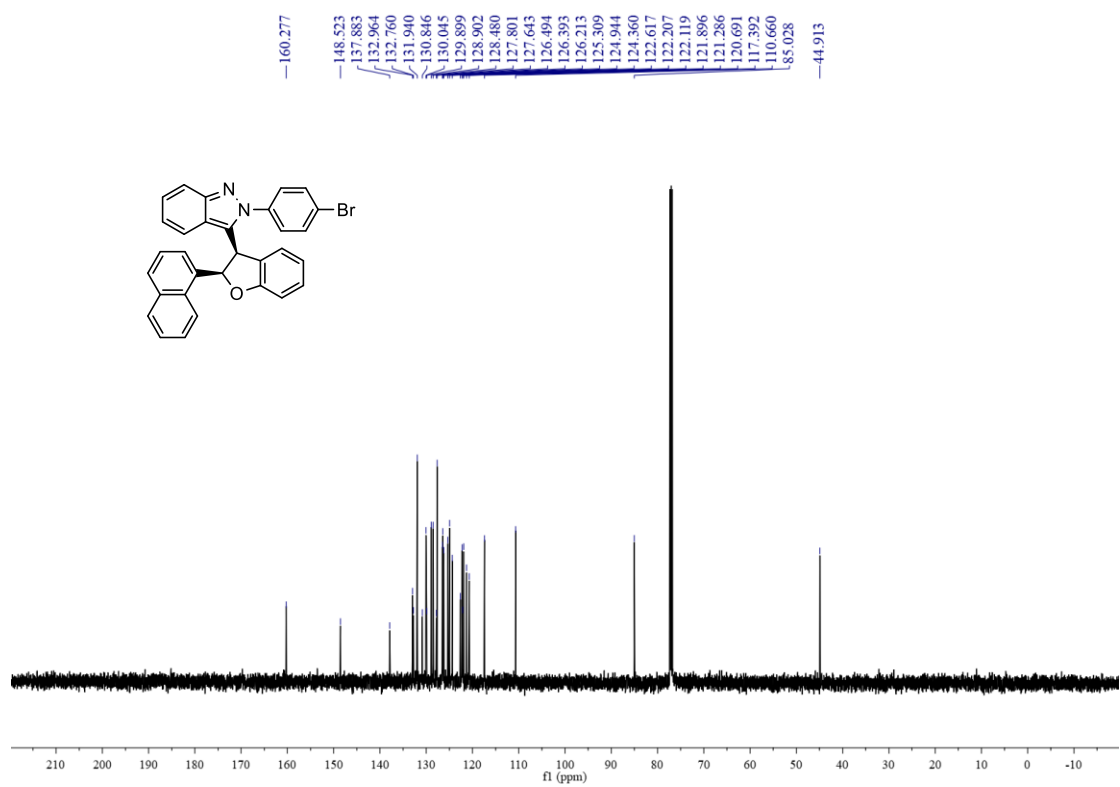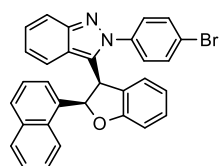

**2-(4-bromophenyl)-3-((2R,3R)-2-(naphthalen-2-yl)-2,3-dihydrobenzofuran-3-yl)-2H-indazole (2m)**

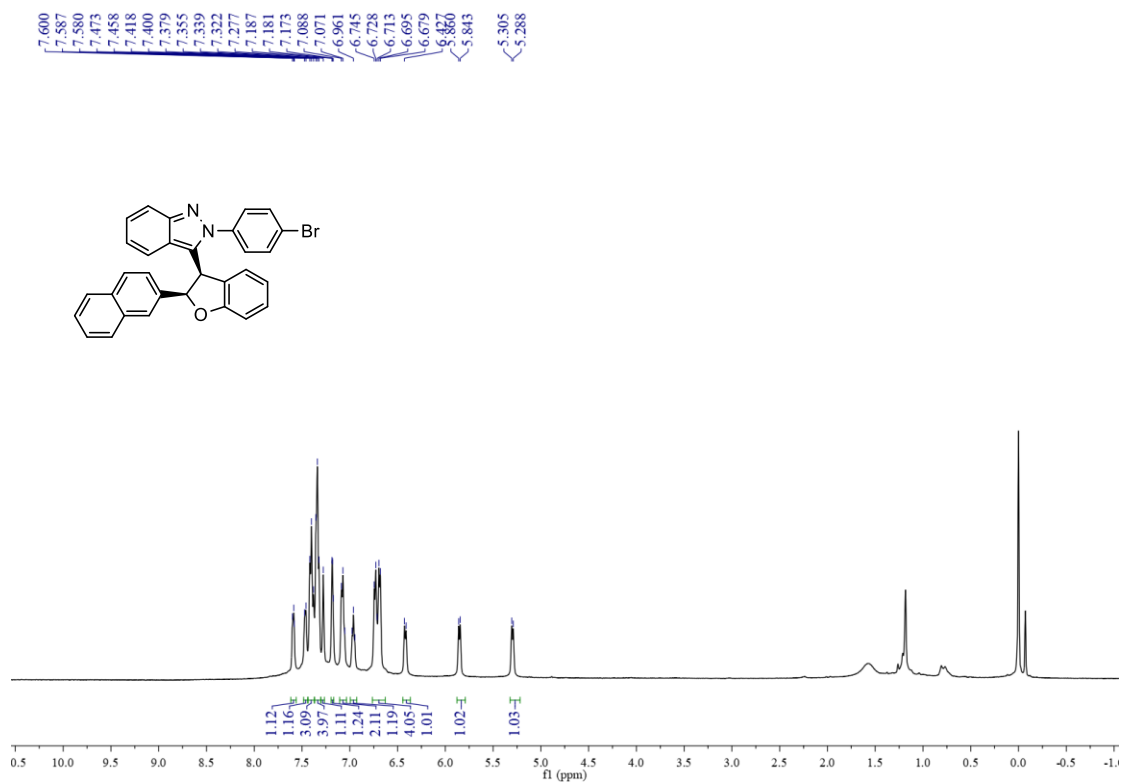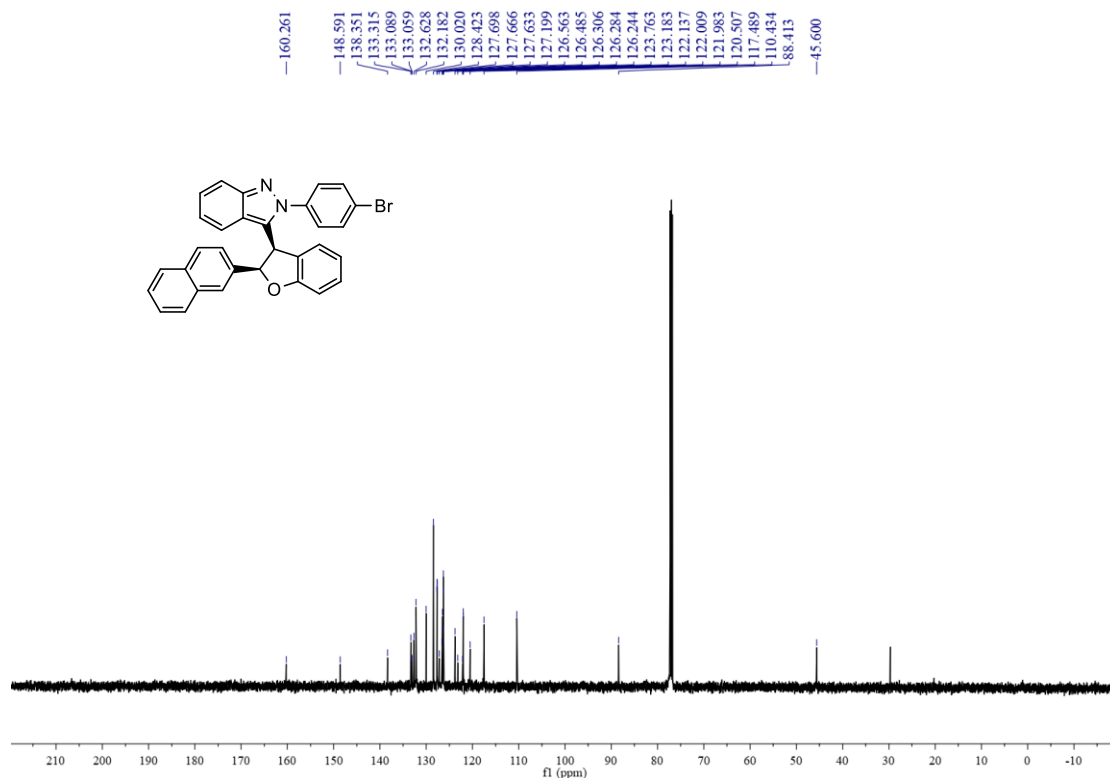

**2-(4-bromophenyl)-3-((2S,3R)-2-vinyl-2,3-dihydrobenzofuran-3-yl)-2H-indazole (2n)**

7.723  
7.707  
7.682  
7.665  
7.432  
7.418  
7.412  
7.277  
7.262  
7.257  
7.246  
7.231  
6.990  
6.975  
6.882  
6.867  
6.852  
6.812  
6.795  
5.636  
5.620  
5.616  
5.601  
5.586  
5.582  
5.566  
5.566  
5.552  
5.537  
5.520  
5.290  
5.273  
5.134  
5.123  
5.114  
5.103

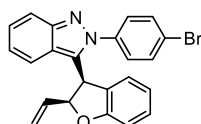

97:3 d.r.

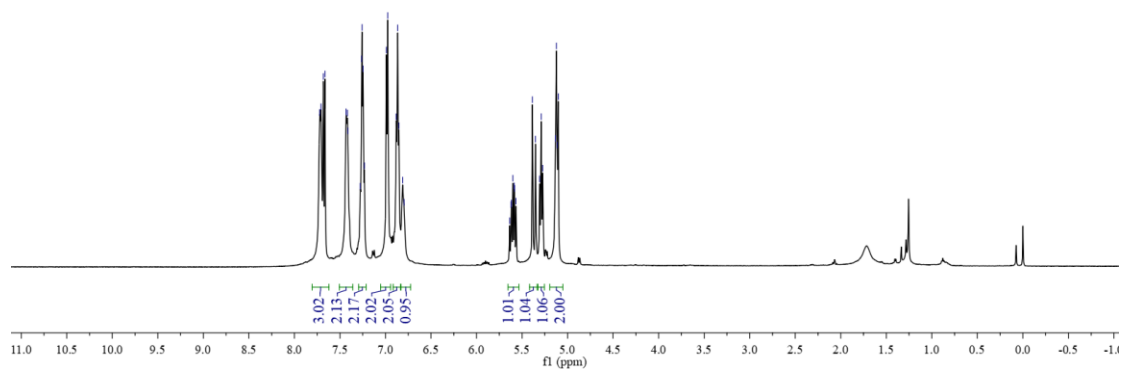

159.390  
148.981  
138.612  
133.770  
133.443  
132.632  
129.694  
128.301  
127.050  
126.906  
125.702  
123.541  
122.143  
121.476  
120.832  
120.377  
117.638  
110.115  
86.809  
44.122

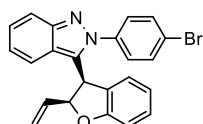

97:3 d.r.

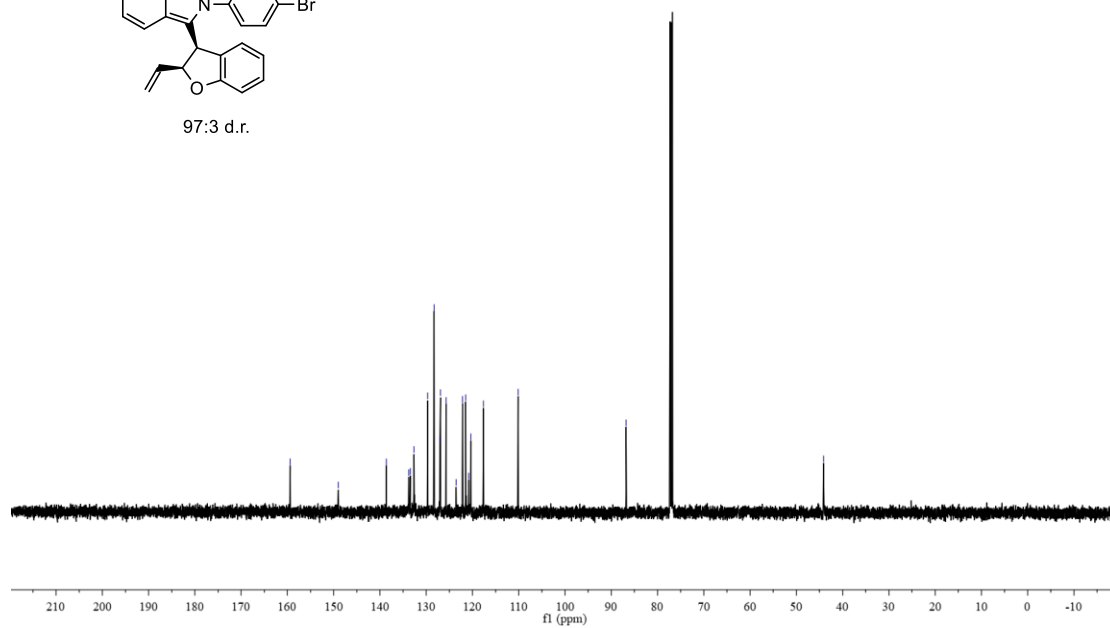



2-(4-bromophenyl)-3-((2R,3R)-2-(prop-1-yn-1-yl)-2,3-dihydrobenzofuran-3-yl)-2H-indazole (2o)

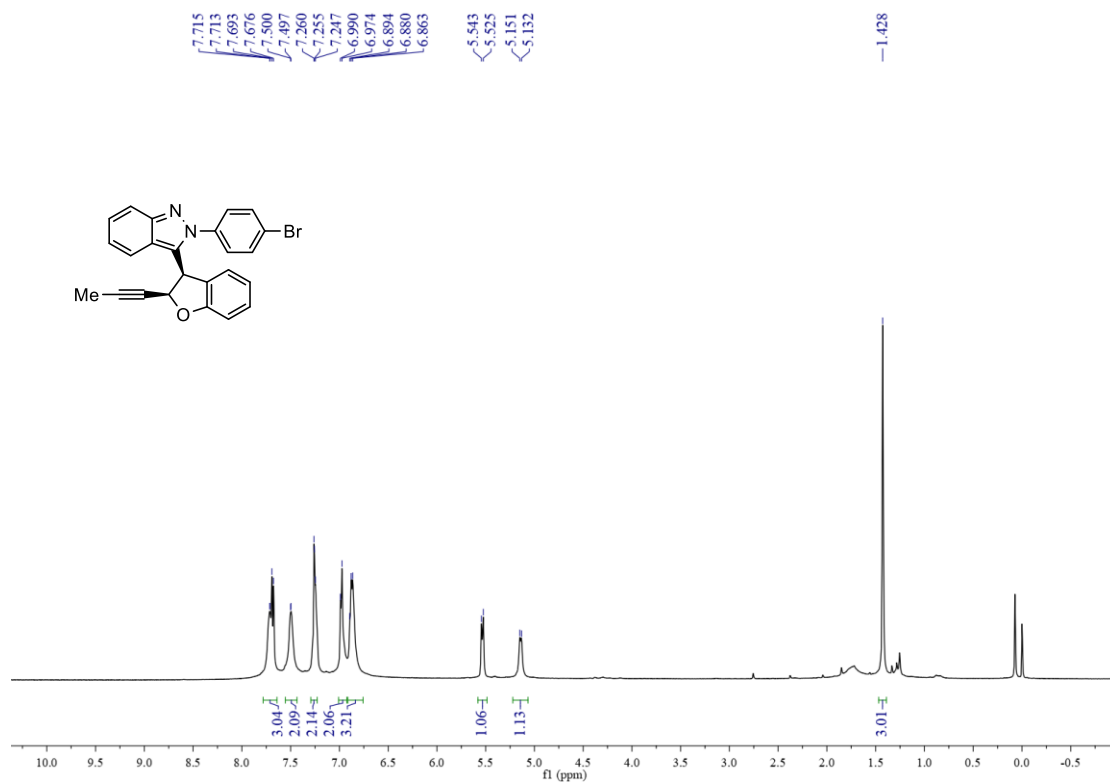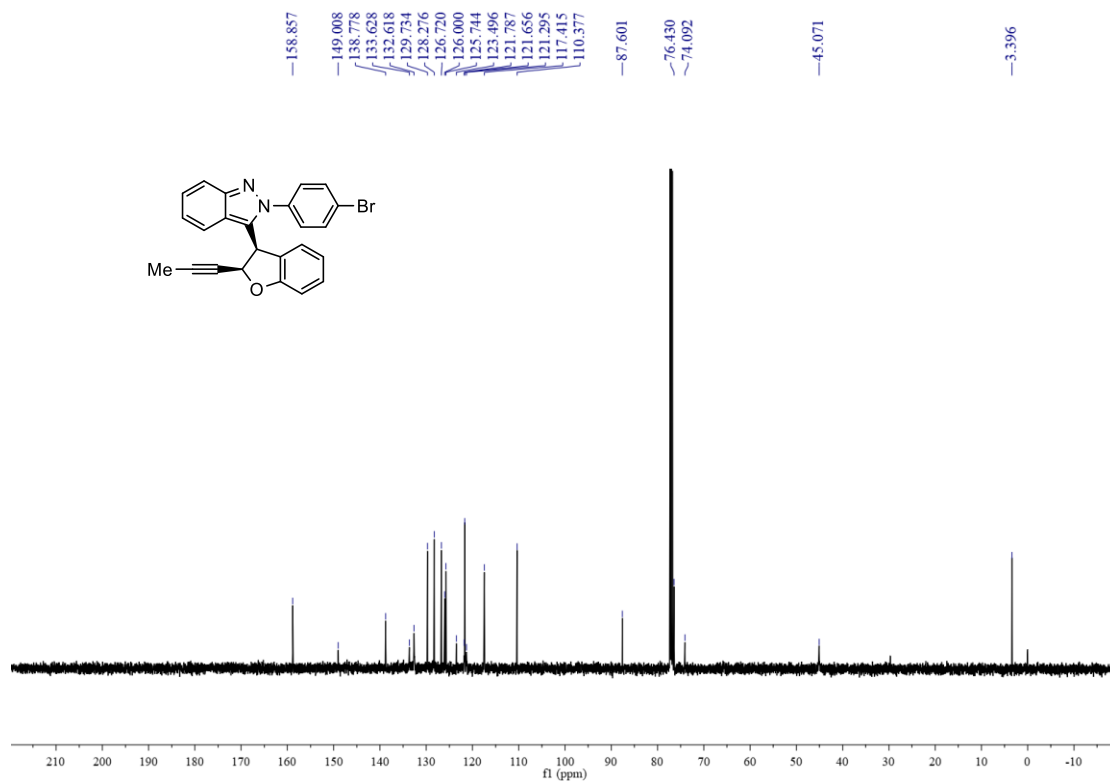

**2-(4-bromophenyl)-3-((2R,3R)-2-((trimethylsilyl)ethynyl)-2,3-dihydrobenzofuran-3-yl)-2H-indazole**  
(2p)

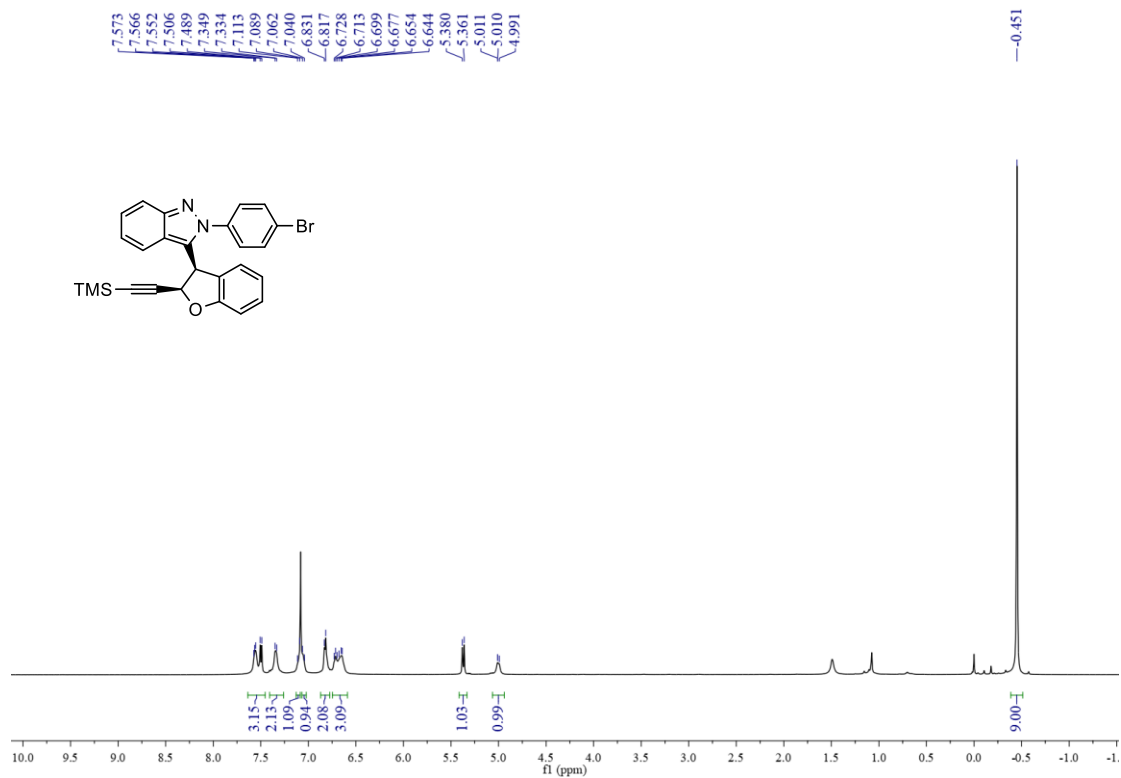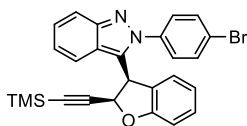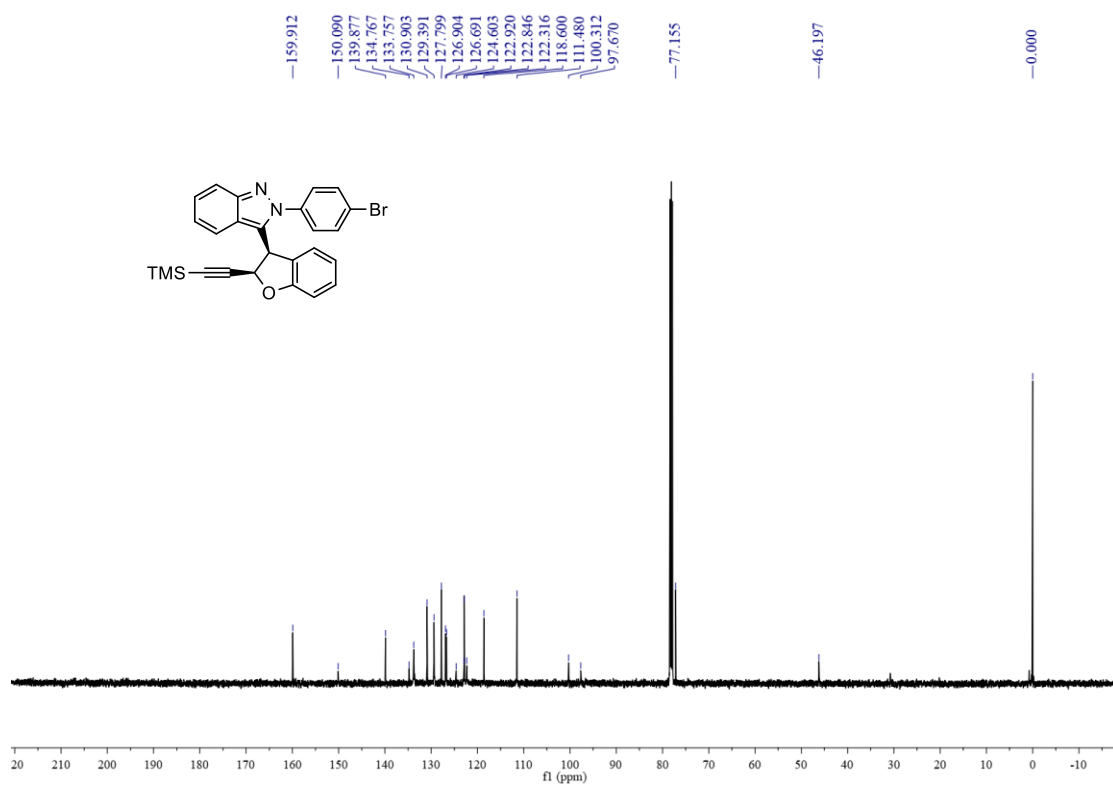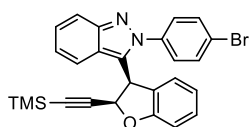

**2-(4-bromophenyl)-3-((2S,3R)-2-phenethyl-2,3-dihydrobenzofuran-3-yl)-2H-indazole (2q)**

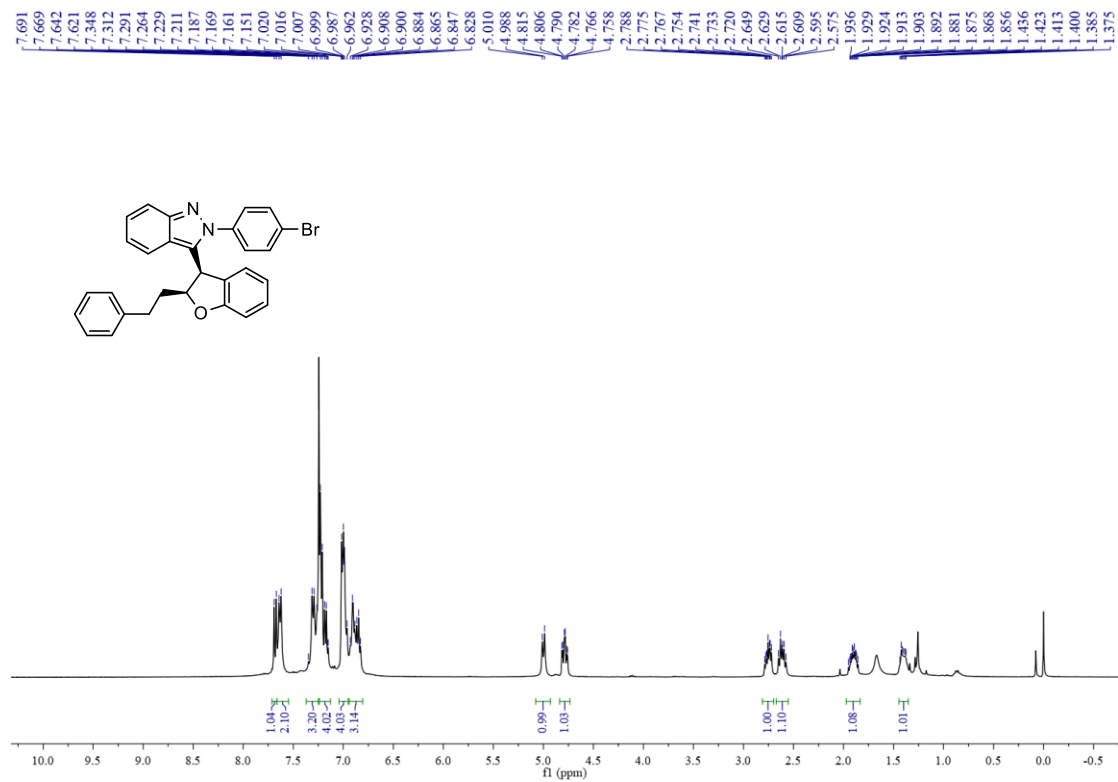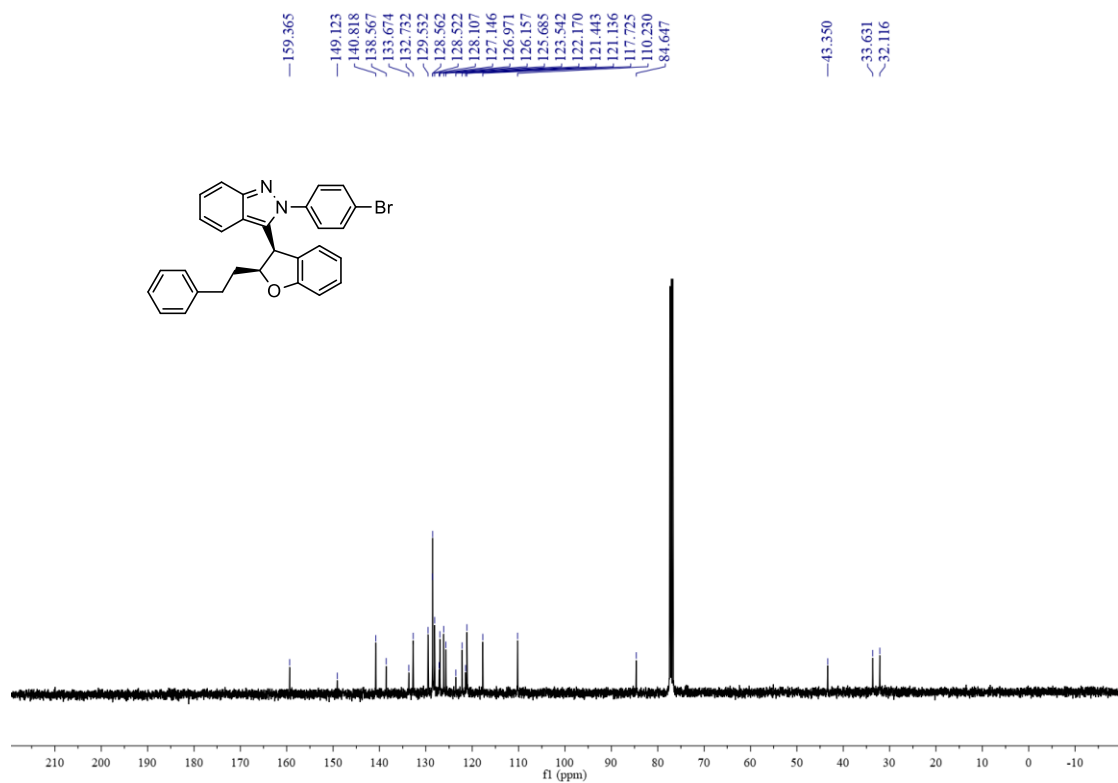

**2-(4-bromophenyl)-3-((2S,3R)-2-isobutyl-2,3-dihydrobenzofuran-3-yl)-2H-indazole (2r)**

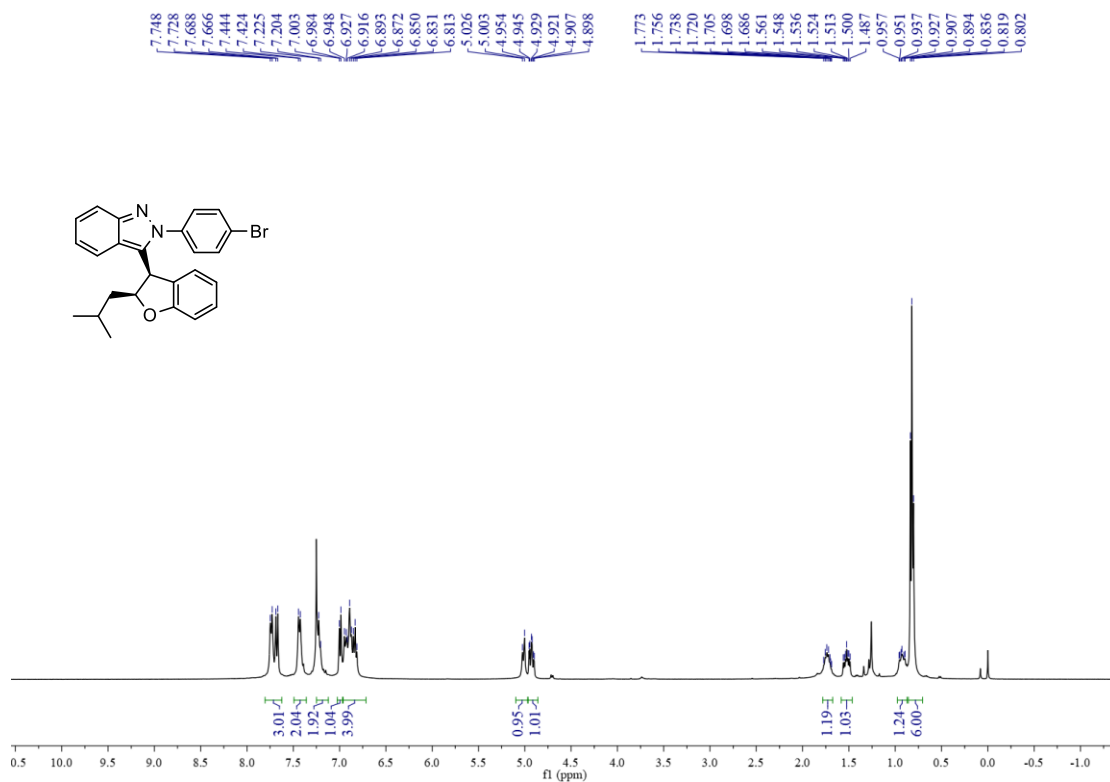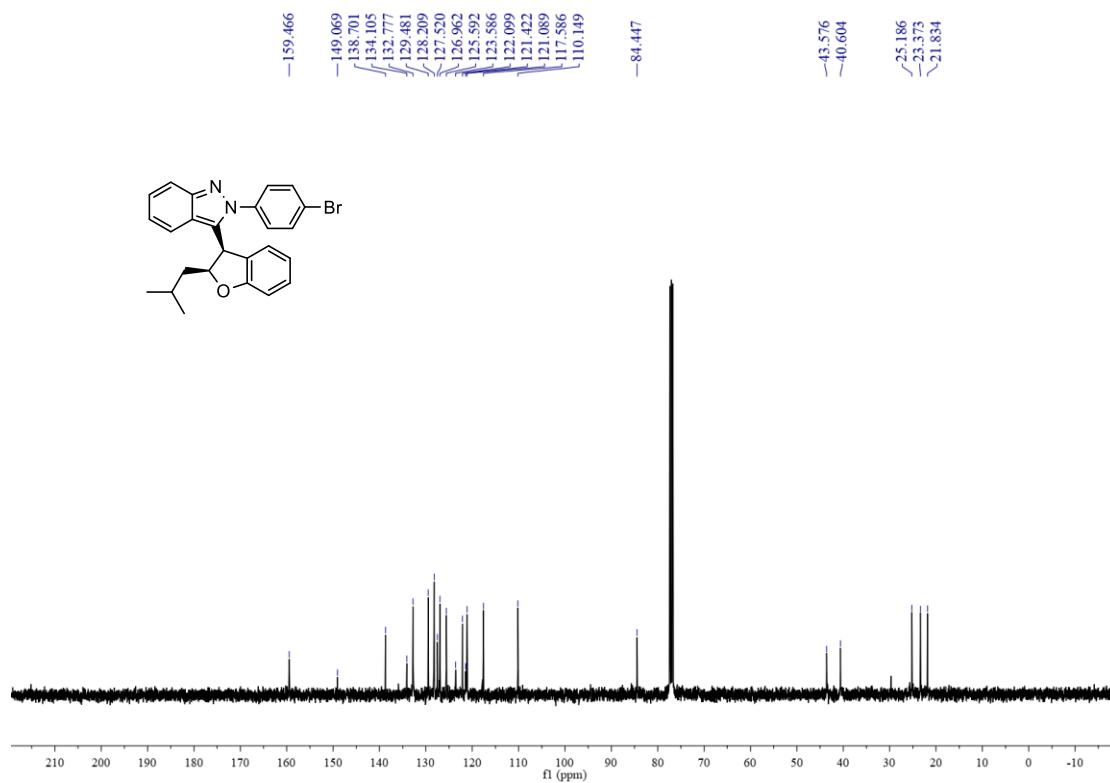

**2-(4-bromophenyl)-3-((2S,3R)-2-isopropyl-2,3-dihydrobenzofuran-3-yl)-2H-indazole (2s)**

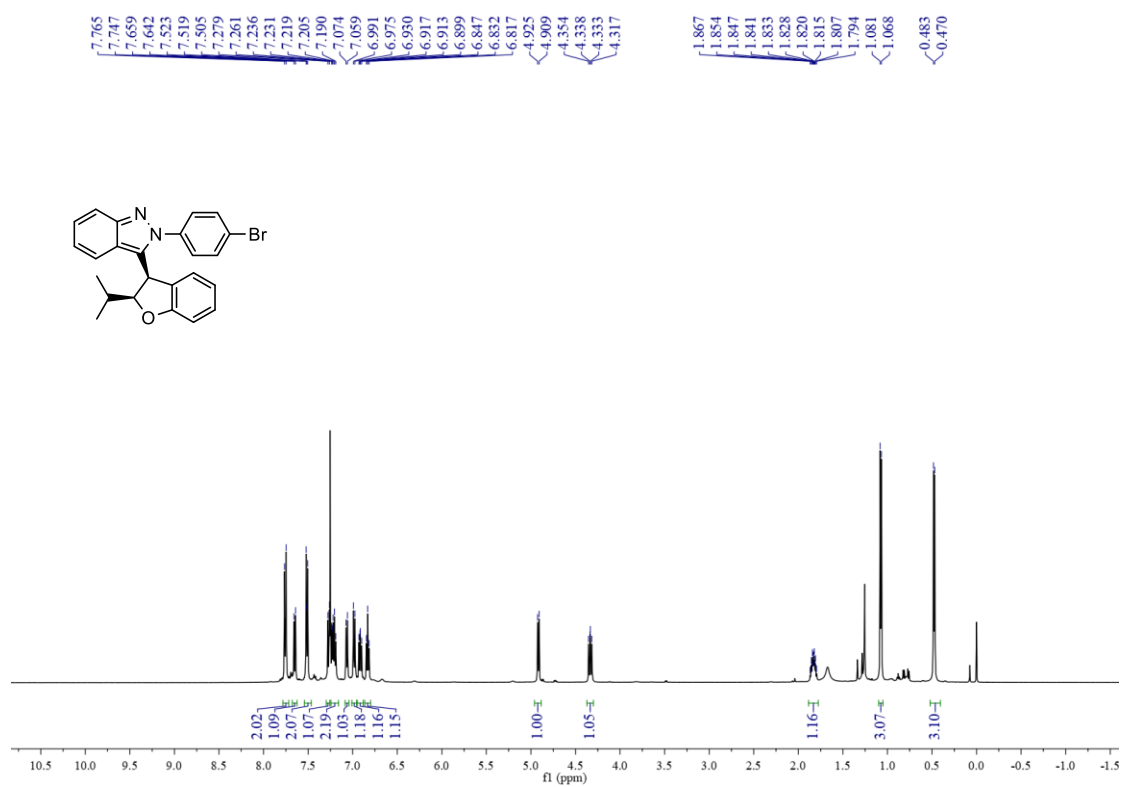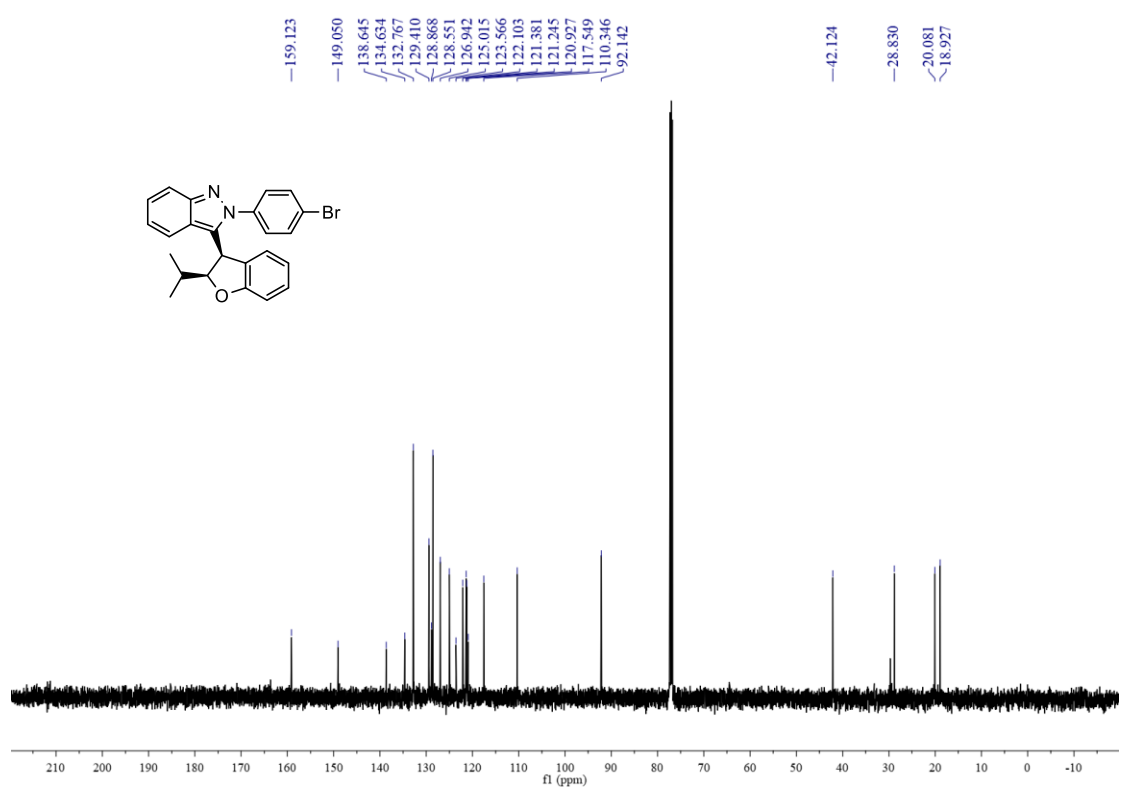

**2-(4-bromophenyl)-3-((2S,3R)-2-cyclopropyl-2,3-dihydrobenzofuran-3-yl)-2H-indazole (2t)**

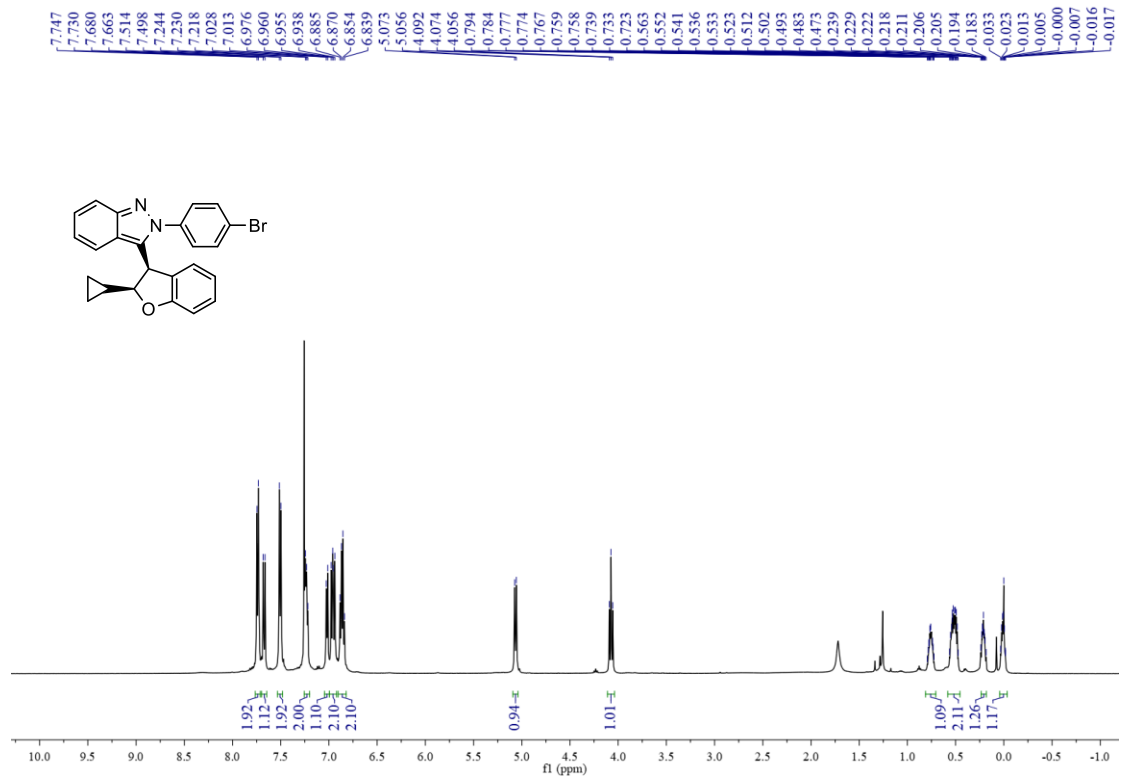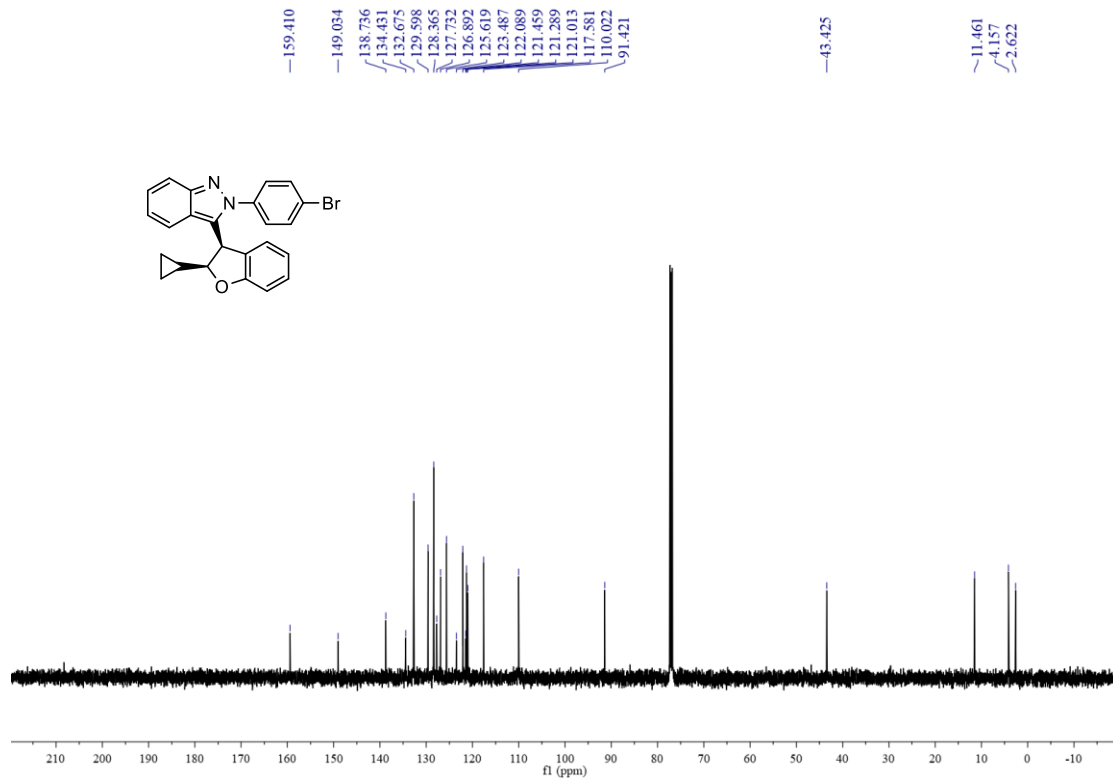

**2-(4-bromophenyl)-3-((2S,3R)-2-(2-methoxyethyl)-2,3-dihydrobenzofuran-3-yl)-2H-indazole (2u)**

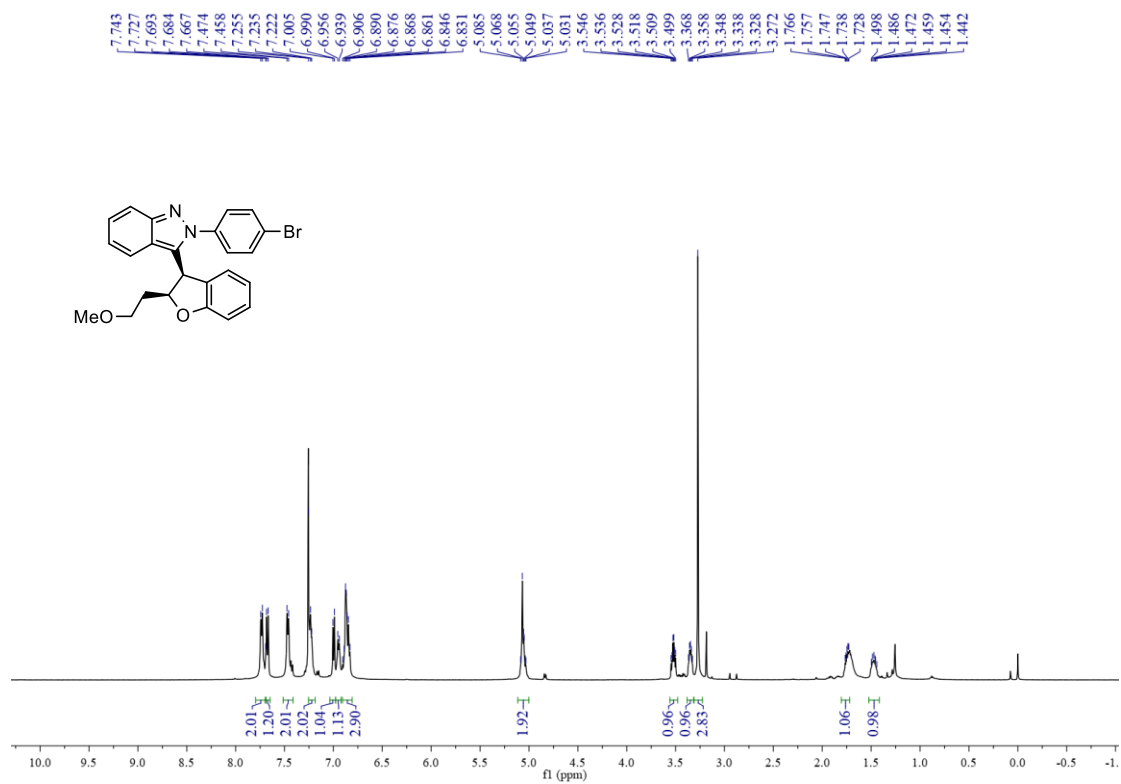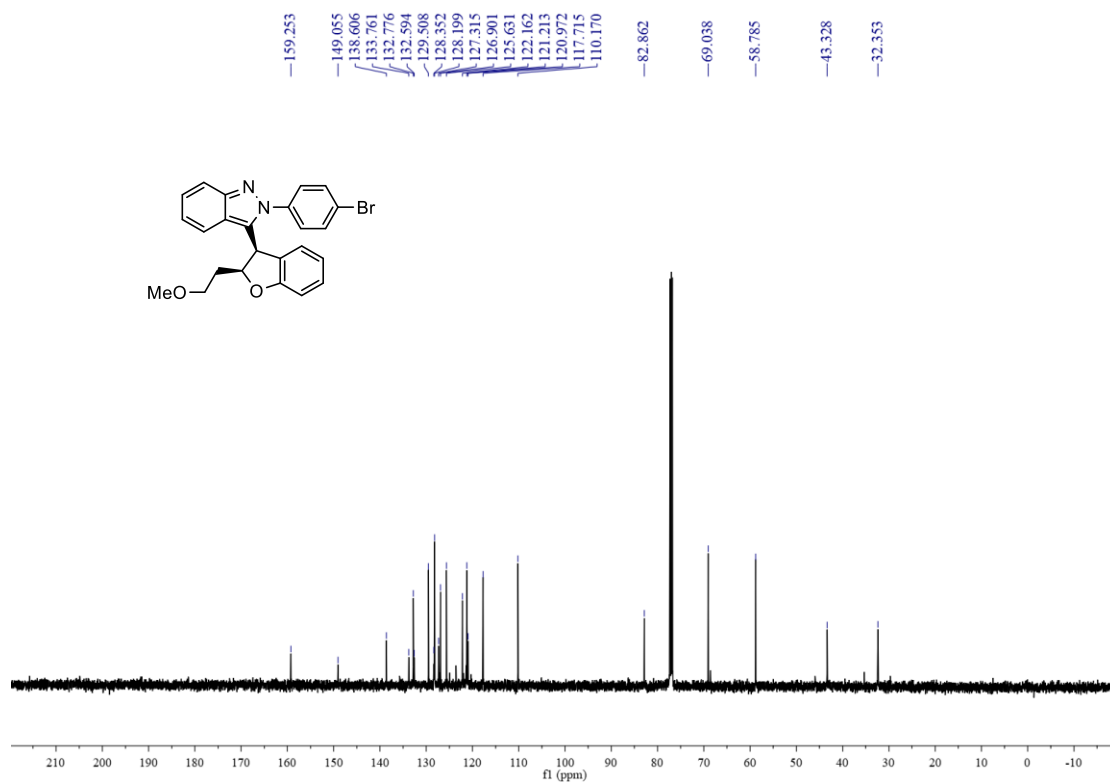

**2-phenyl-3-((2R,3R)-2-phenyl-2,3-dihydrobenzofuran-3-yl)-2H-indazole (2v)**

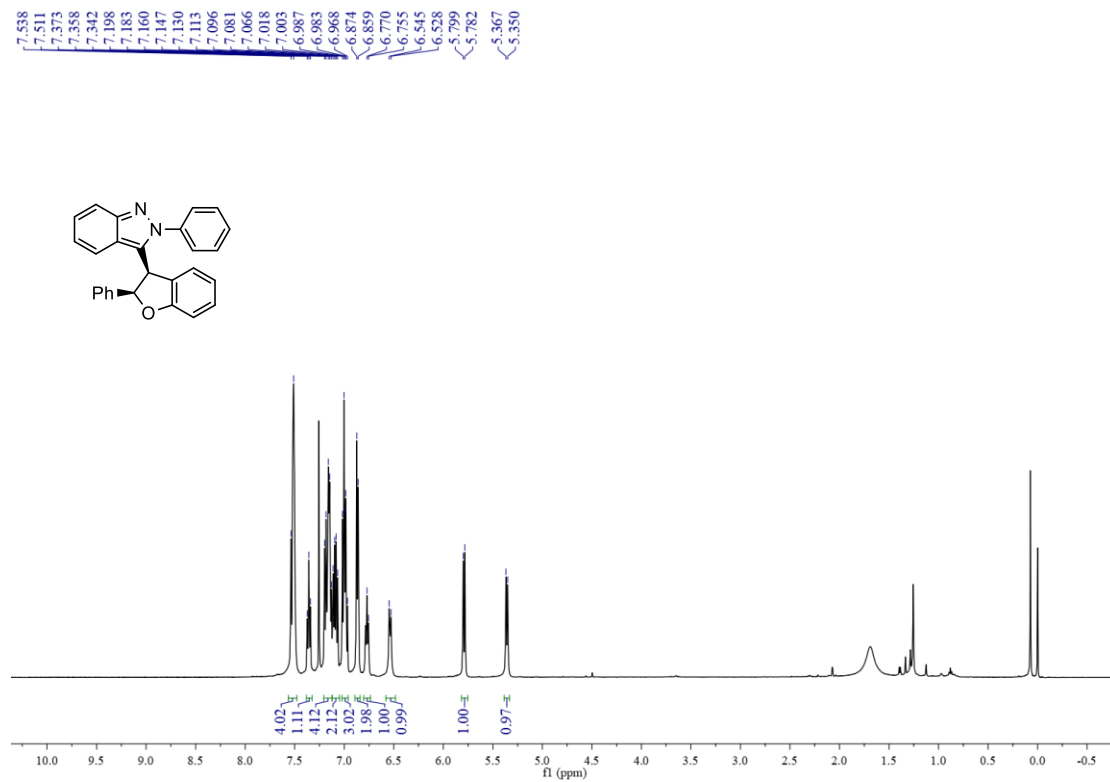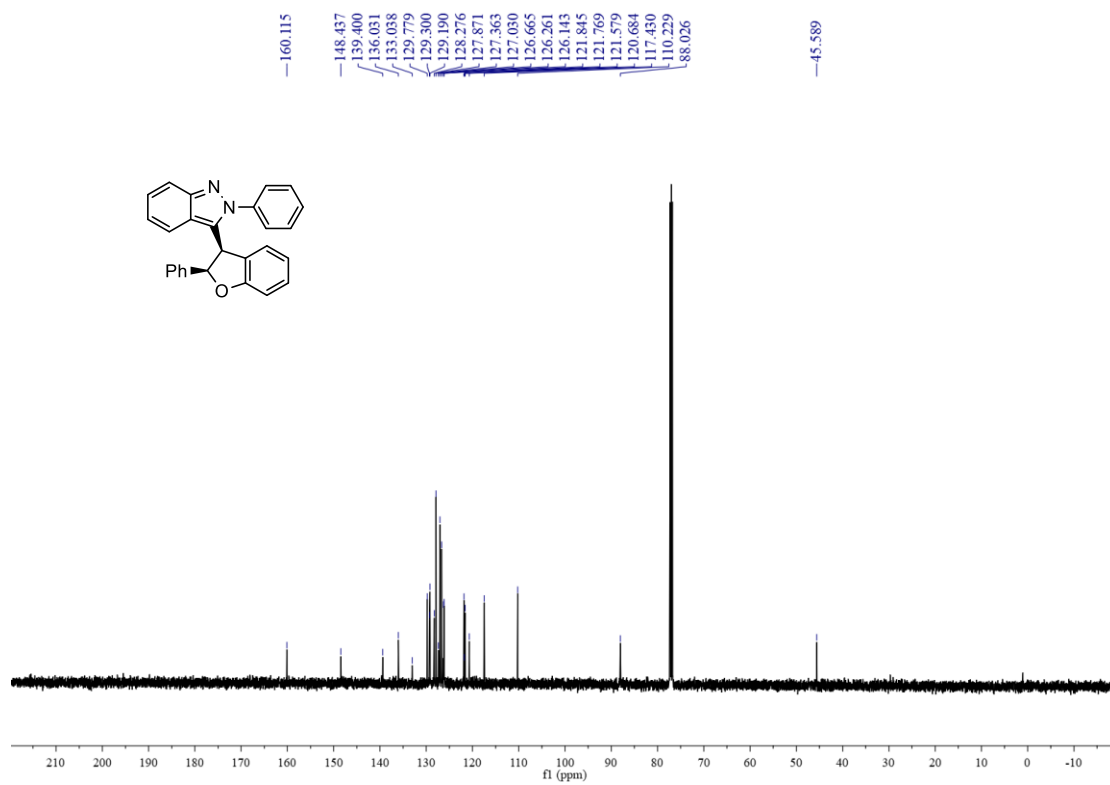



**2-(4-methoxyphenyl)-3-((2R,3R)-2-phenyl-2,3-dihydrobenzofuran-3-yl)-2H-indazole (2w)**

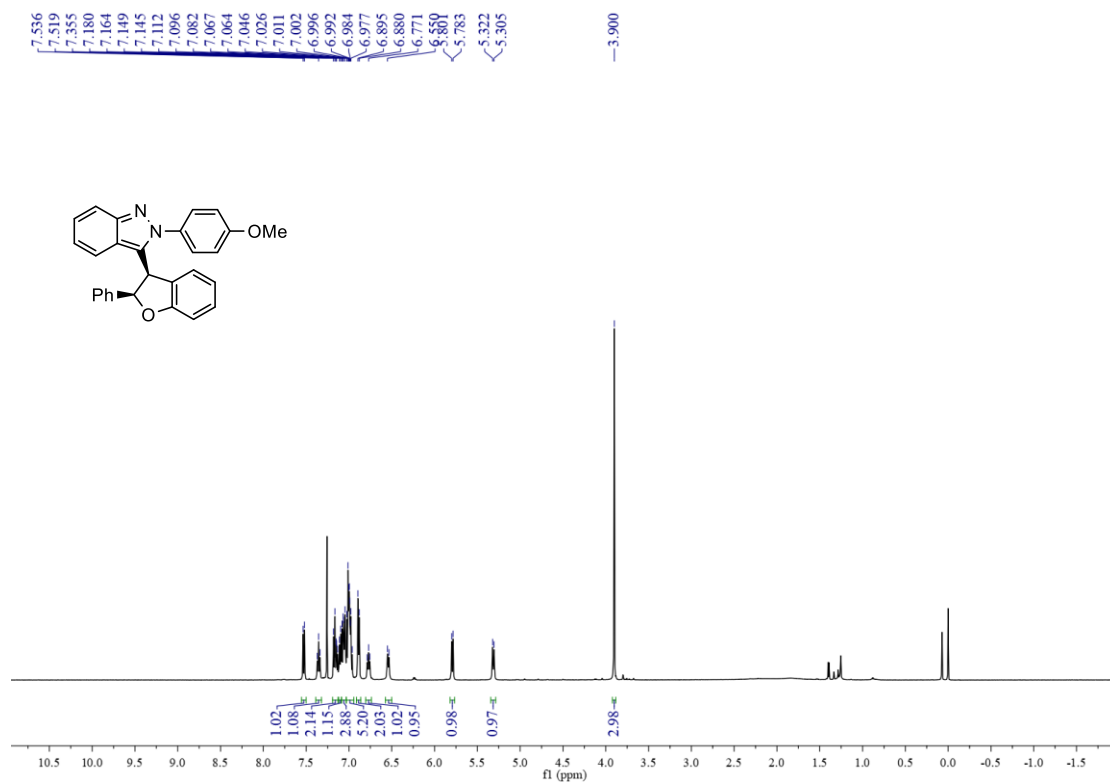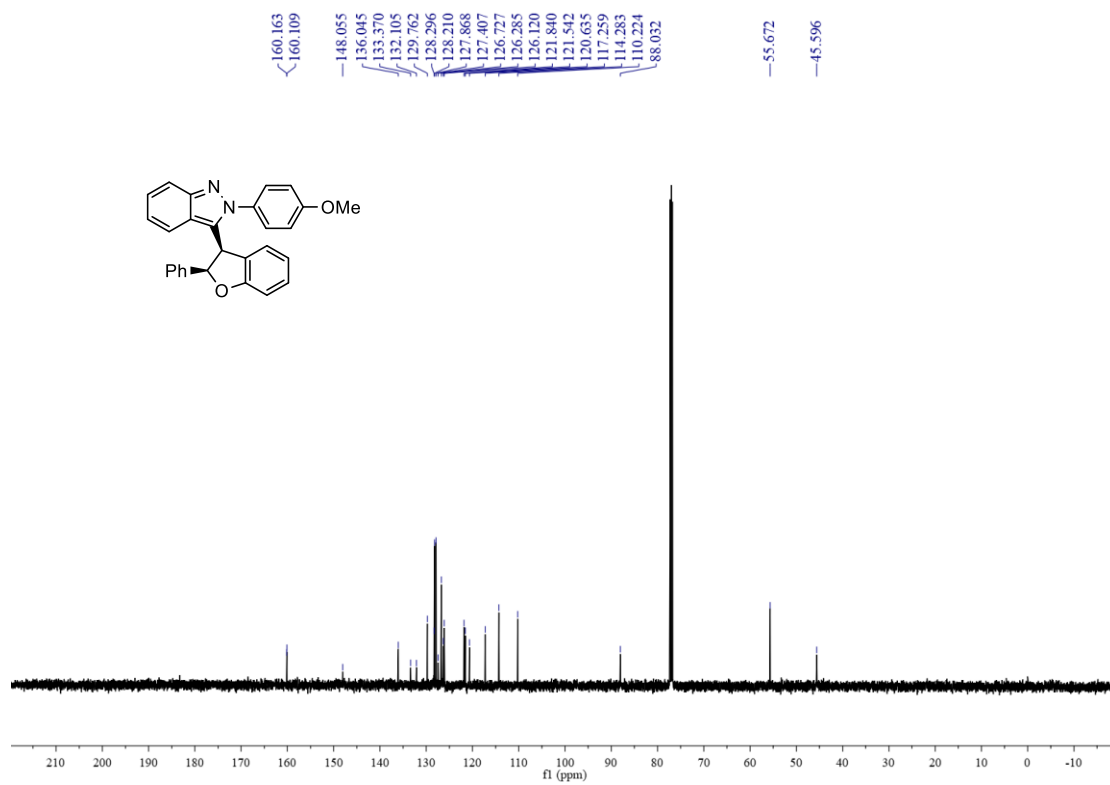

2-(4-bromophenyl)-5-fluoro-3-((2R,3R)-2-phenyl-2,3-dihydrobenzofuran-3-yl)-2H-indazole (2x)

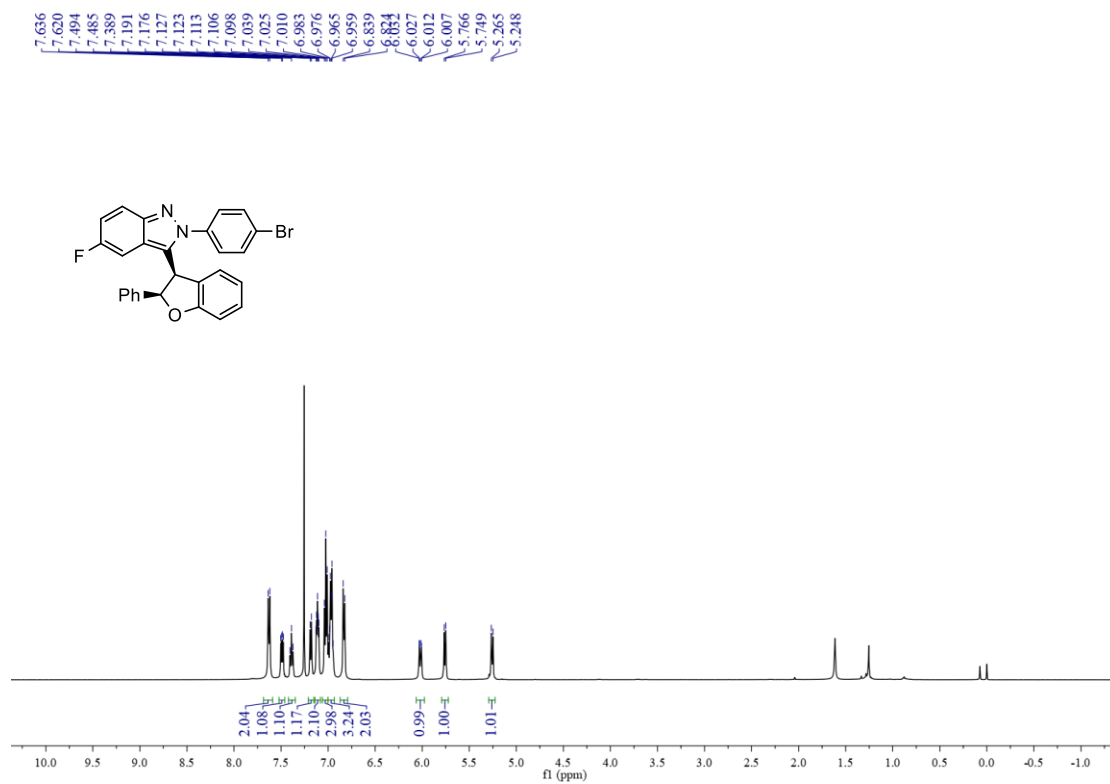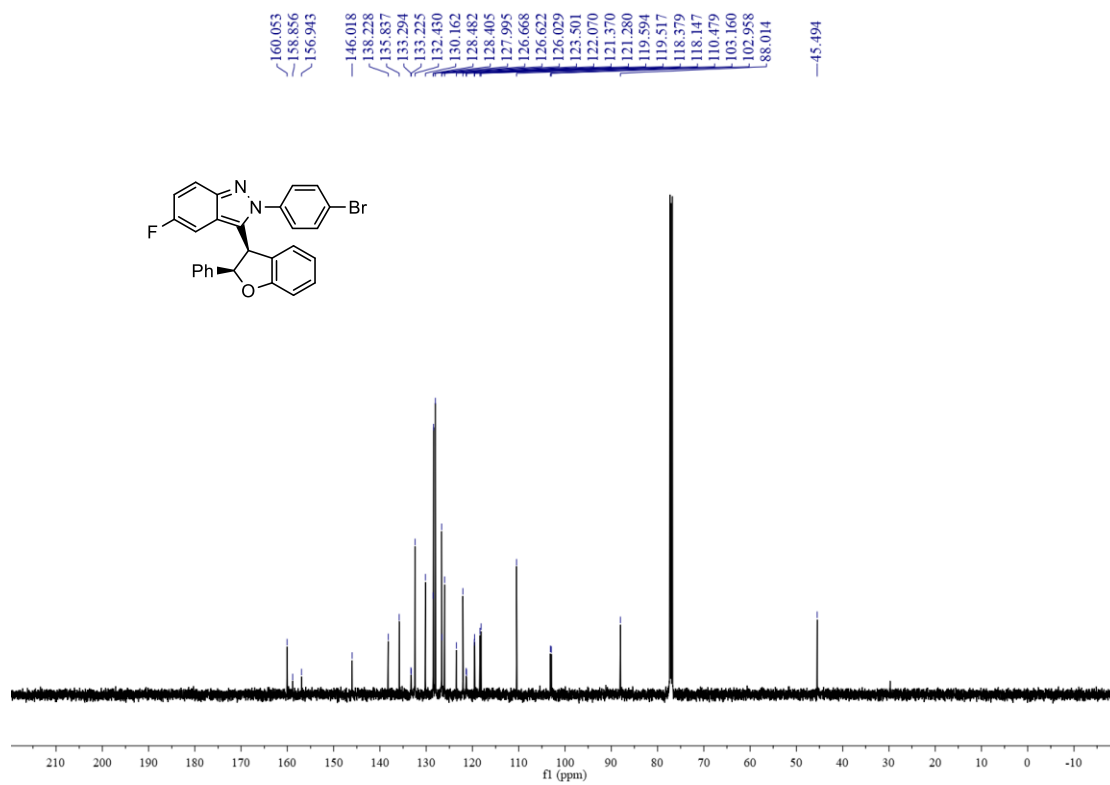

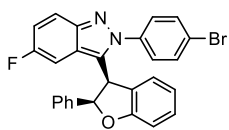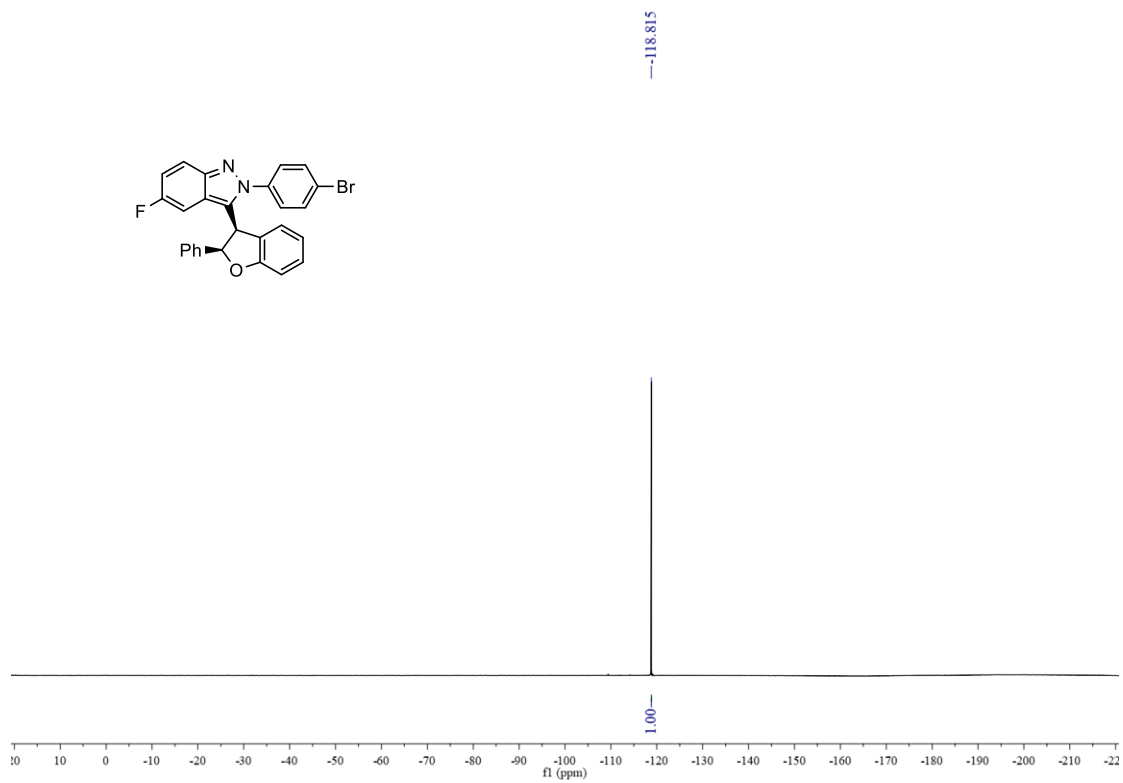

2-(4-bromophenyl)-5-methoxy-3-((2R,3R)-2-phenyl-2,3-dihydrobenzofuran-3-yl)-2H-indazole (2y)

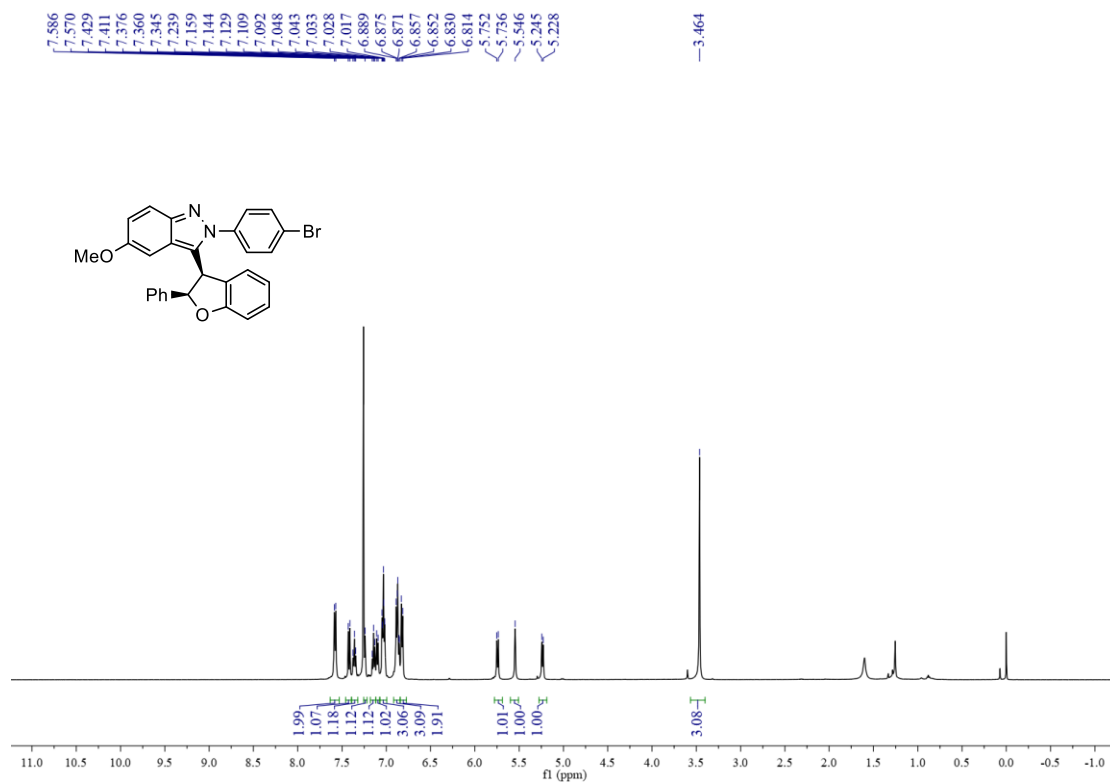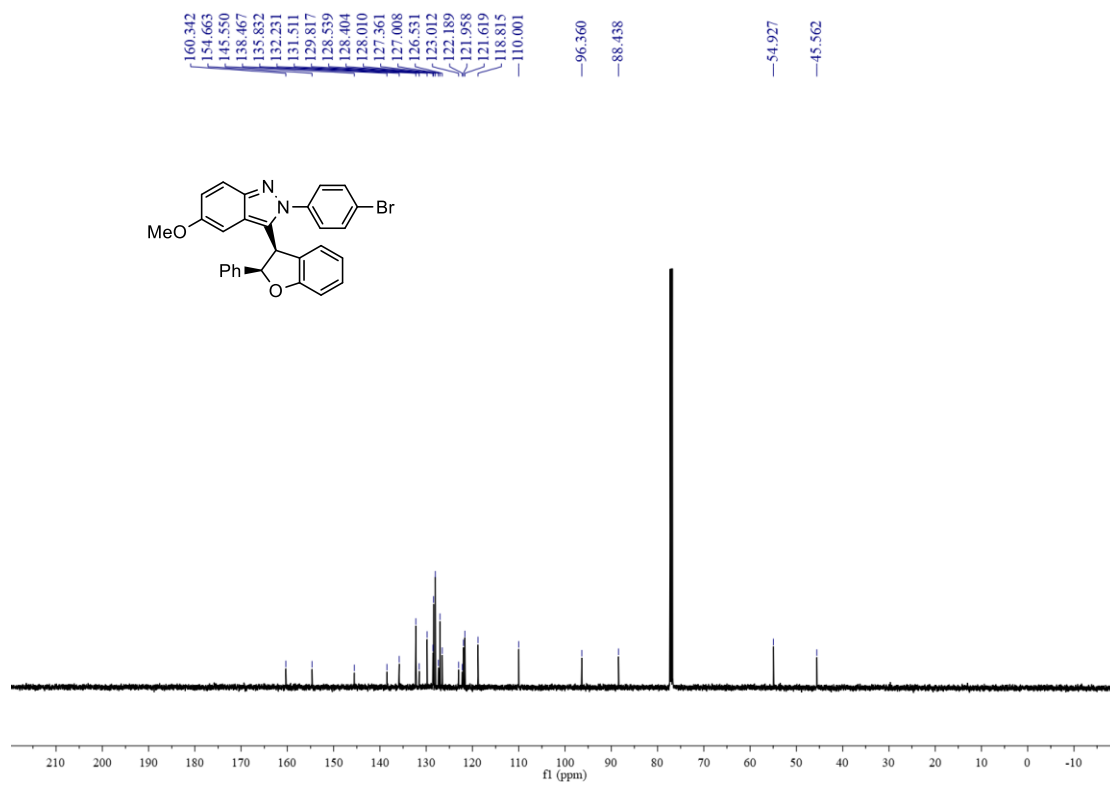

**5-methyl-2-phenyl-3-((2R,3R)-2-phenyl-2,3-dihydrobenzofuran-3-yl)-2H-indazole (2z)**

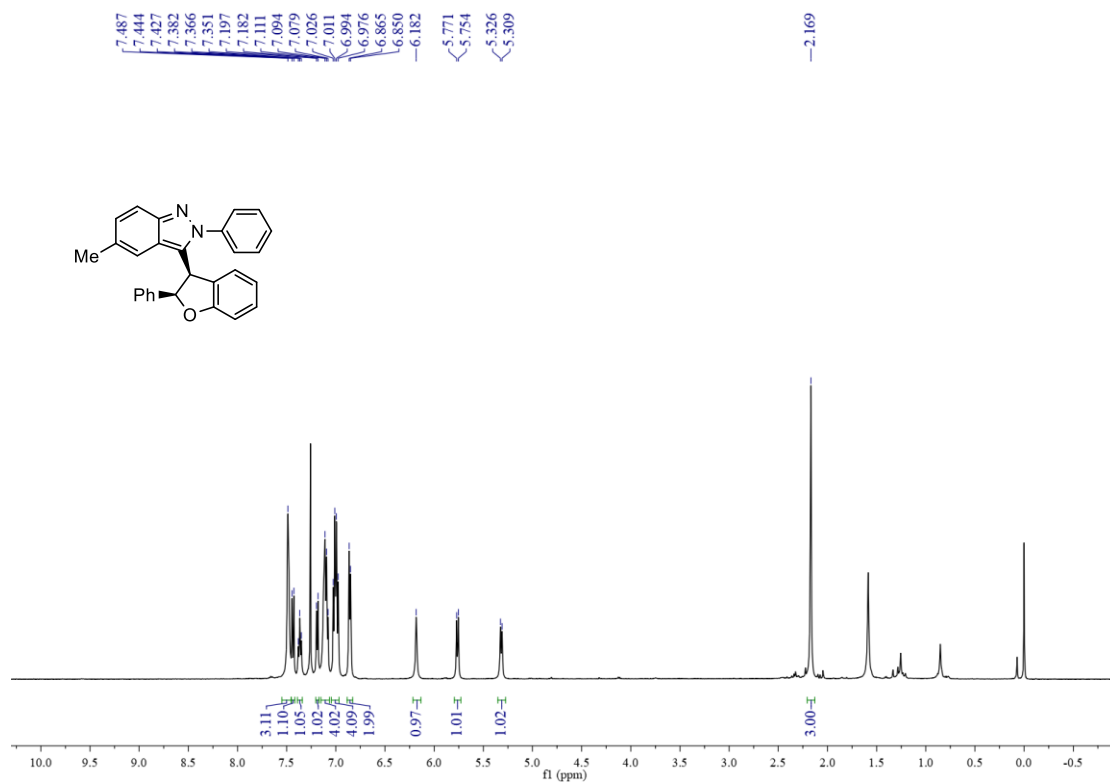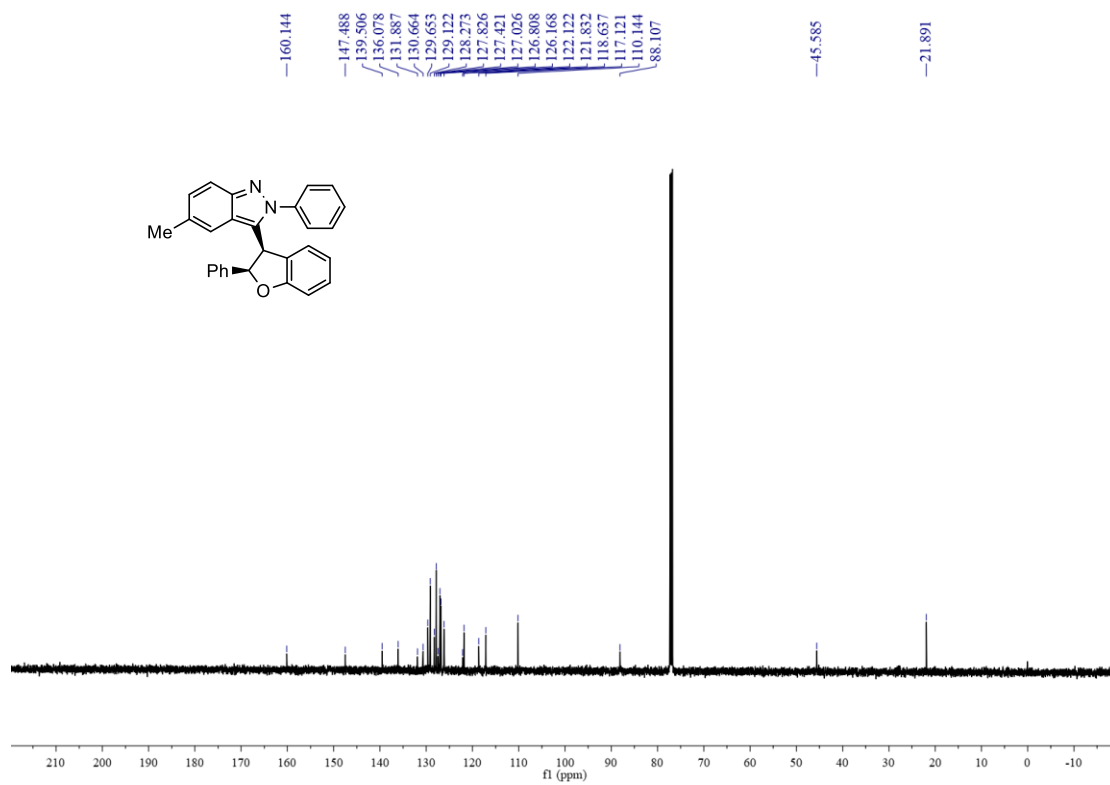

**2-(4-bromophenyl)-3-((2R,3R)-2-phenyltetrahydrofuran-3-yl)-2H-indazole (2aa)**

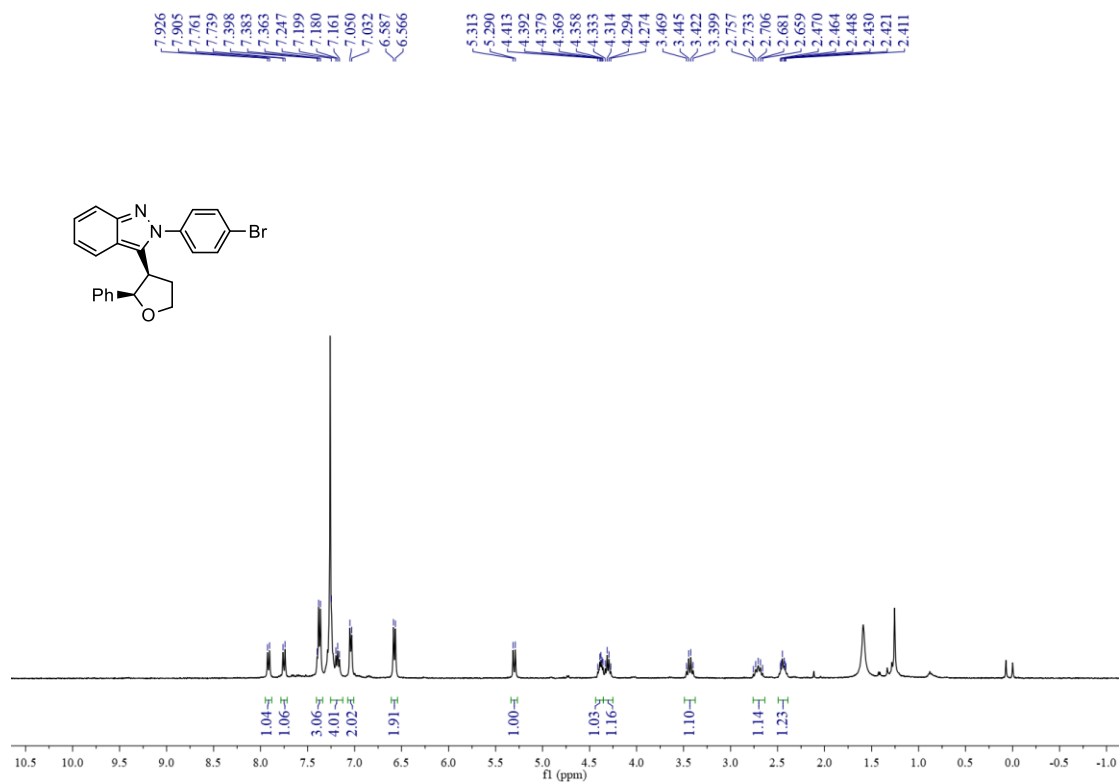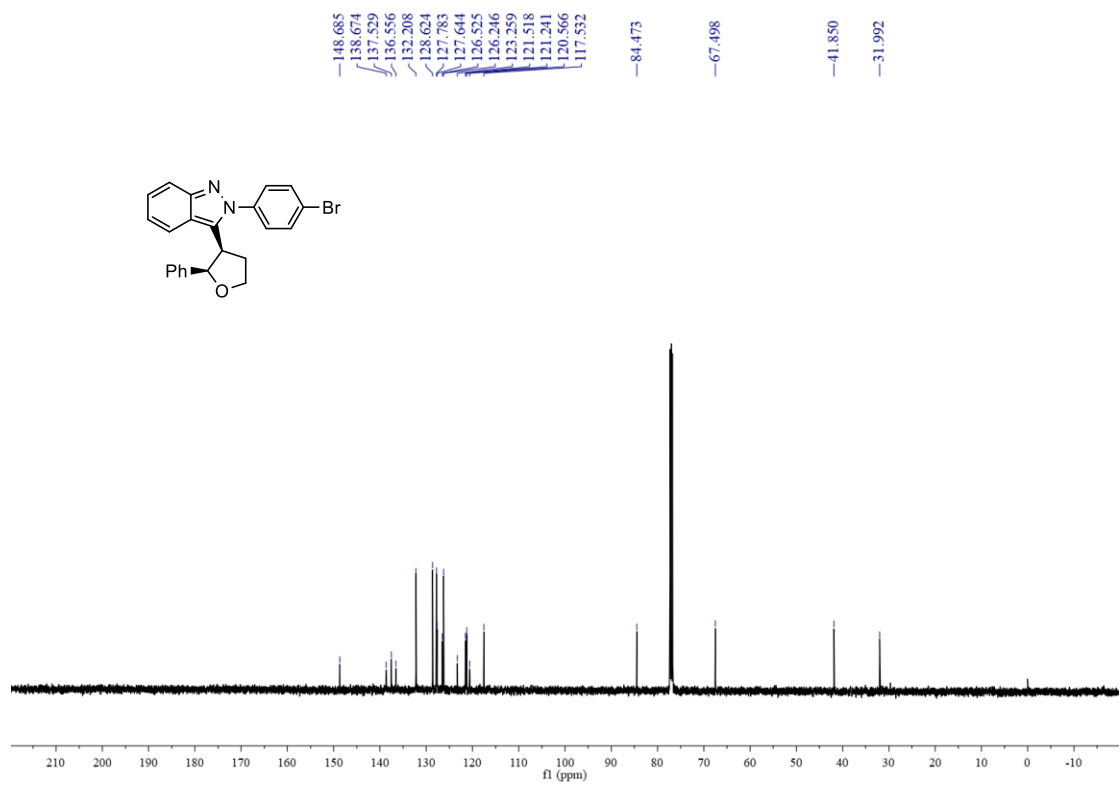

**(9a*S*,10*S*)-10-(2-(4-bromophenyl)-2*H*-indazol-3-yl)-6,7,8,9*a*,10-hexahydropyrido[1,2-*a*]indole  
(2ab)**

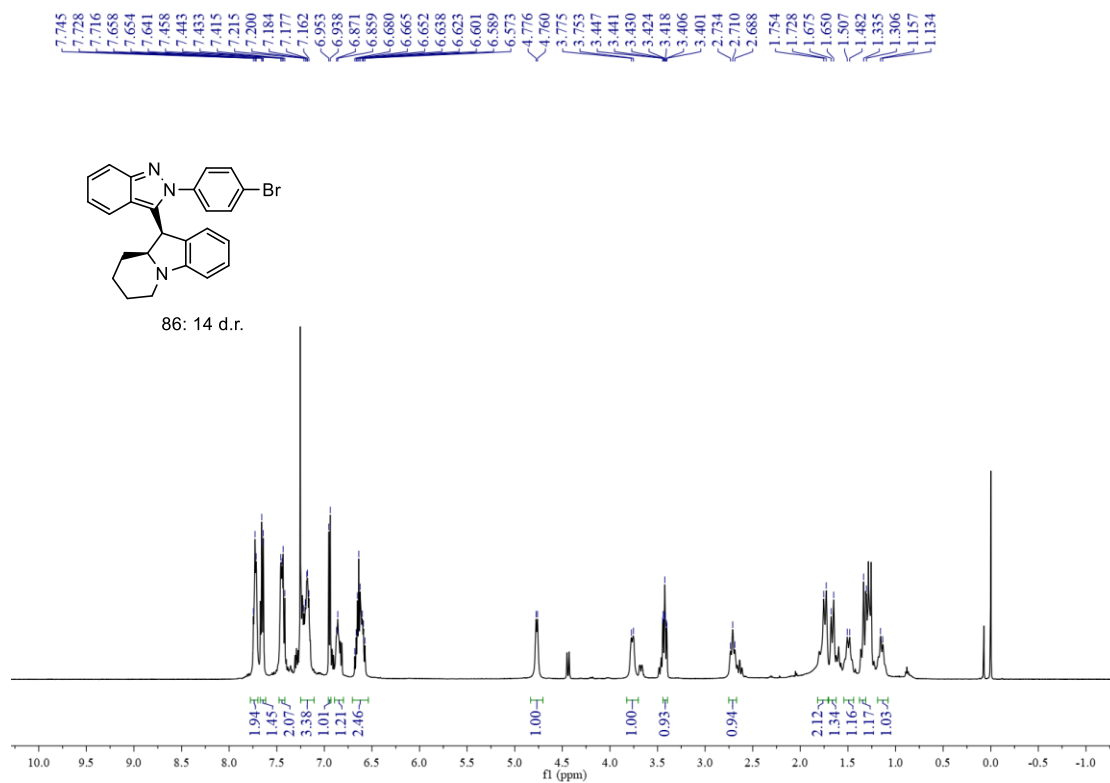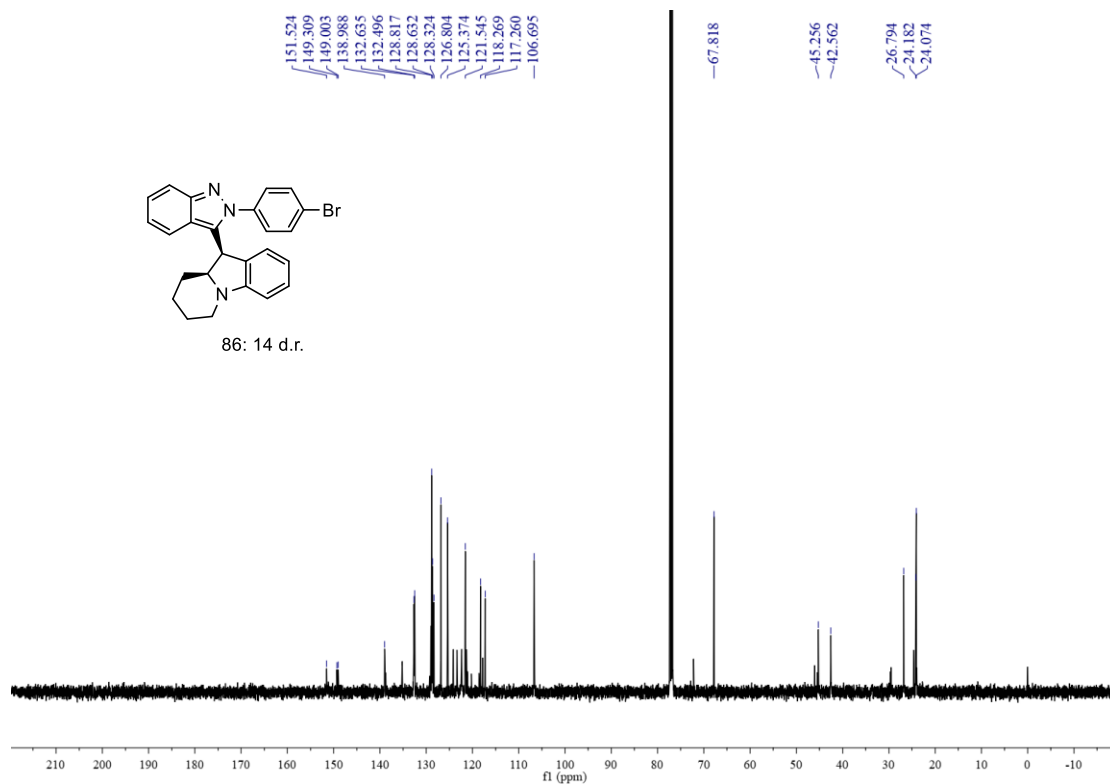

**2-(4-bromophenyl)-3-((2R,3R)-2-phenyl-2,3-dihydrobenzo[b]thiophen-3-yl)-2H-indazole(2ac)**

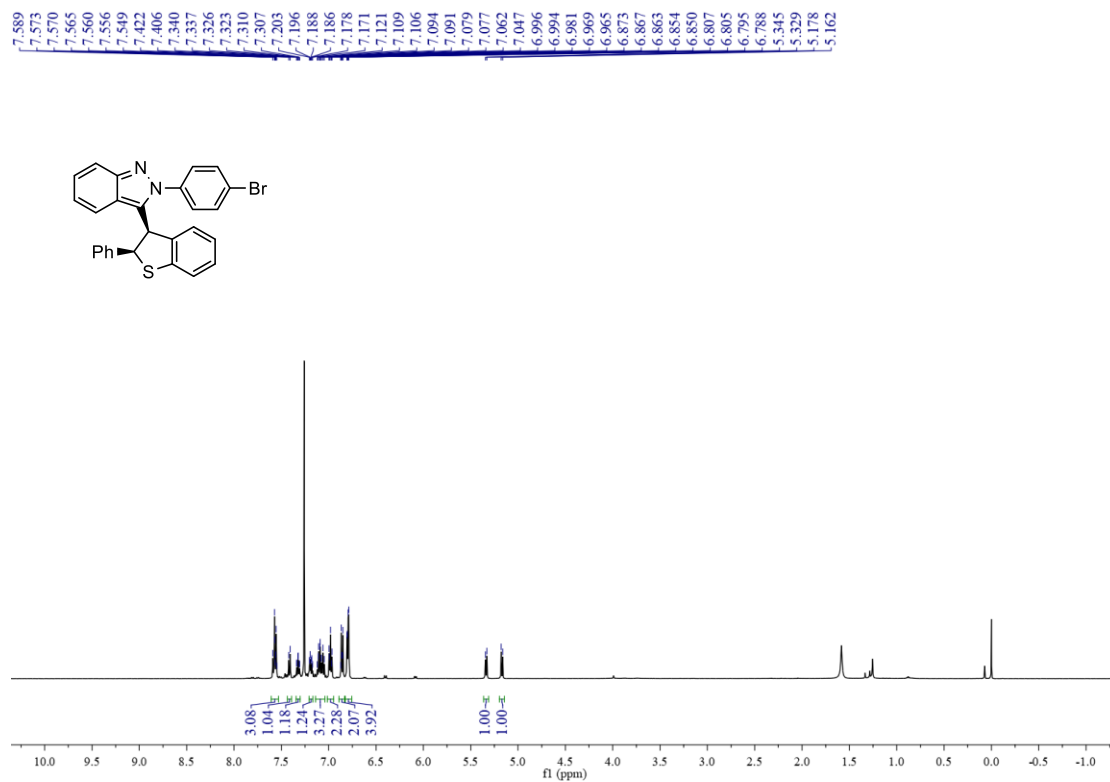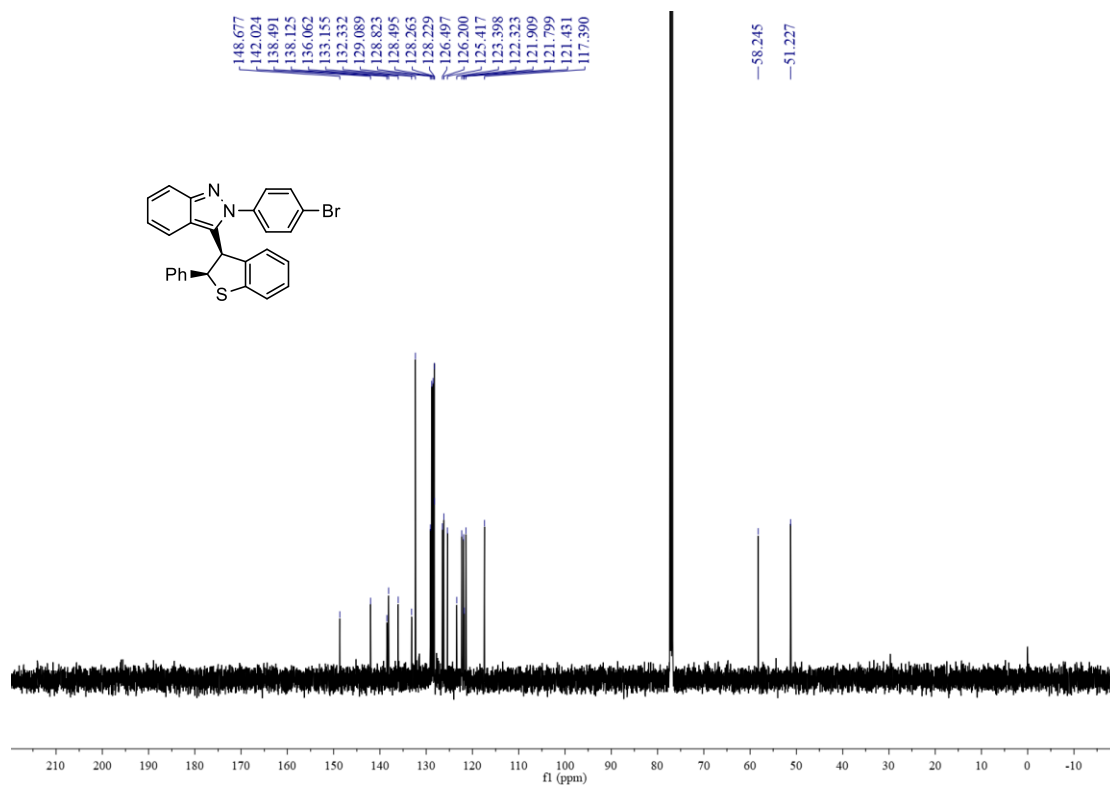



**2-(4-bromophenyl)-3-((1R,2R)-2-phenyl-1,2-dihydronaphtho[2,1-b]furan-1-yl)-2H-indazole (4a)**

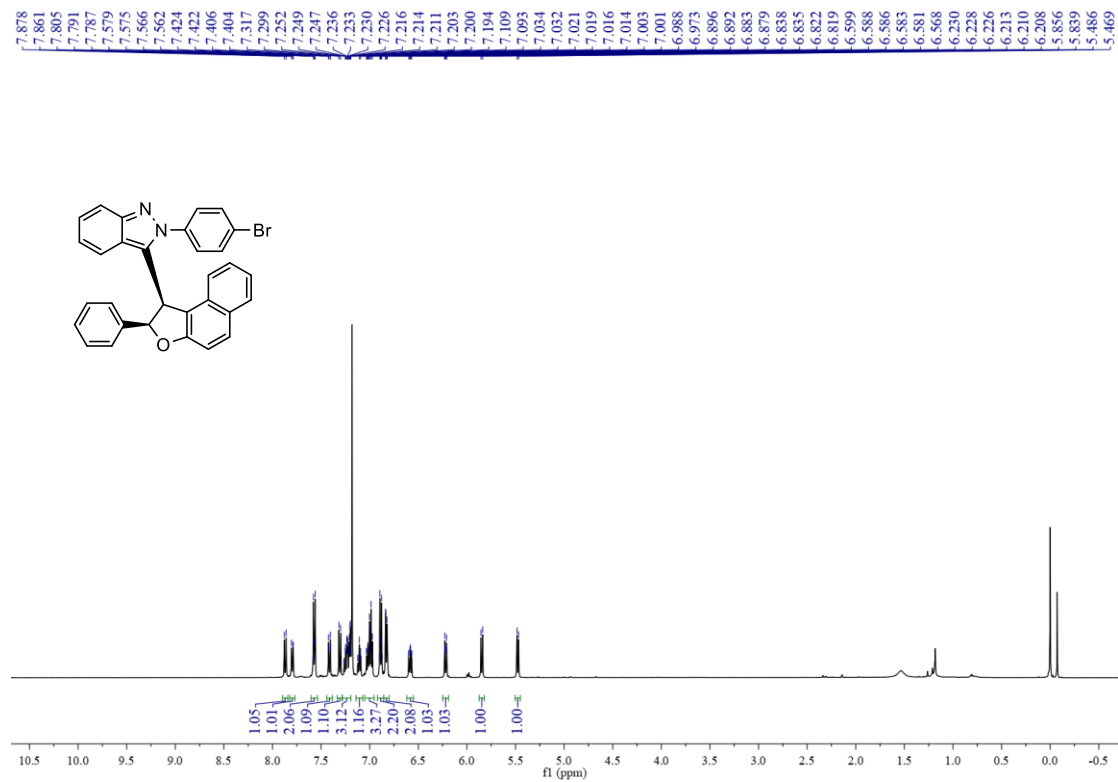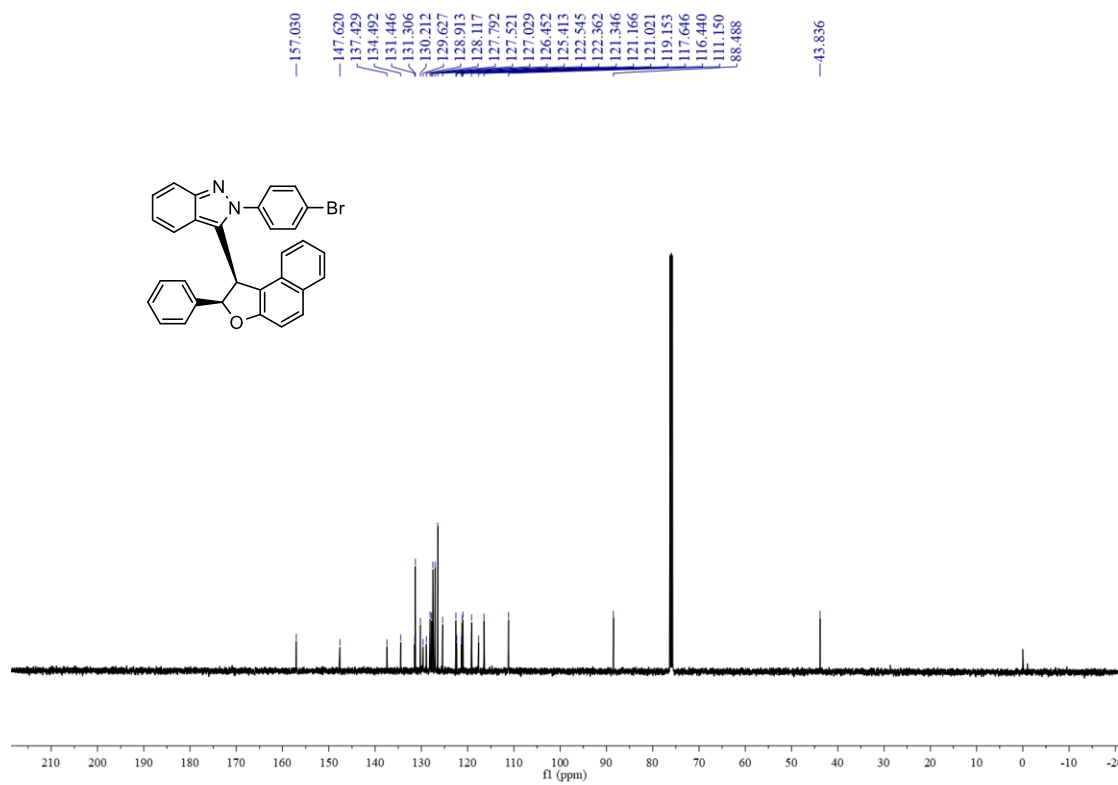

**methyl 4-((1R,2R)-1-(2-(4-bromophenyl)-2H-indazol-3-yl)-1,2-dihydronaphtho[2,1-b]furan-2-yl)-benzoate (4b)**

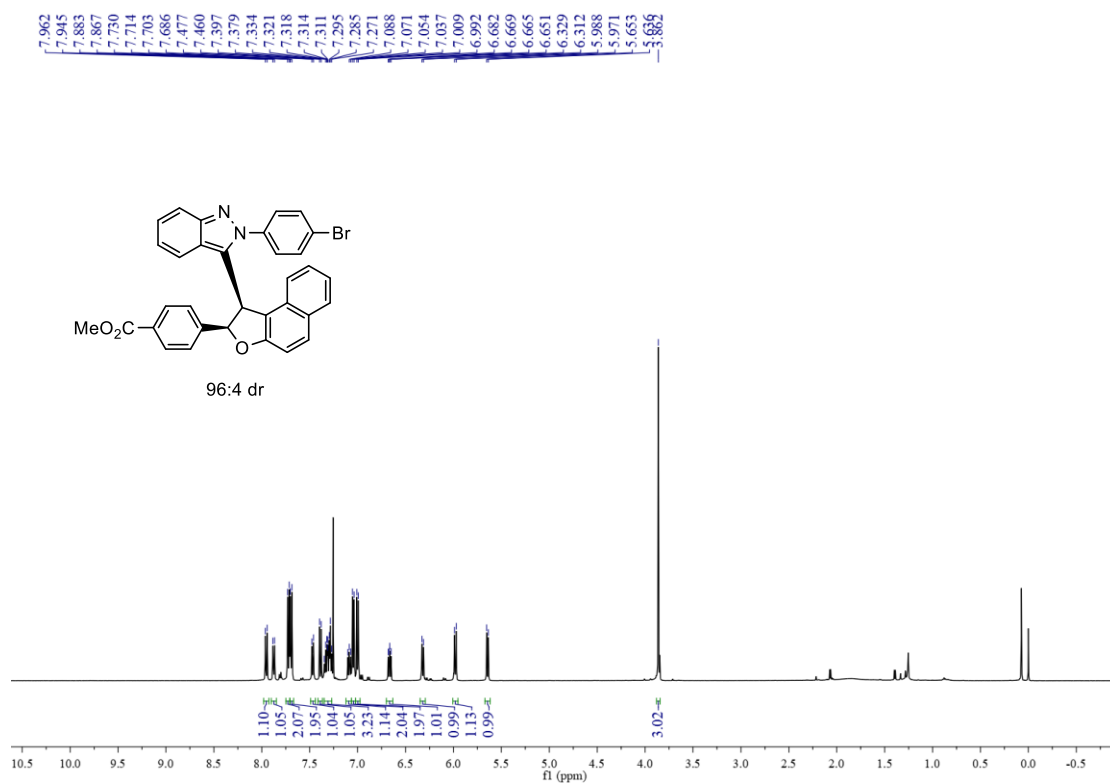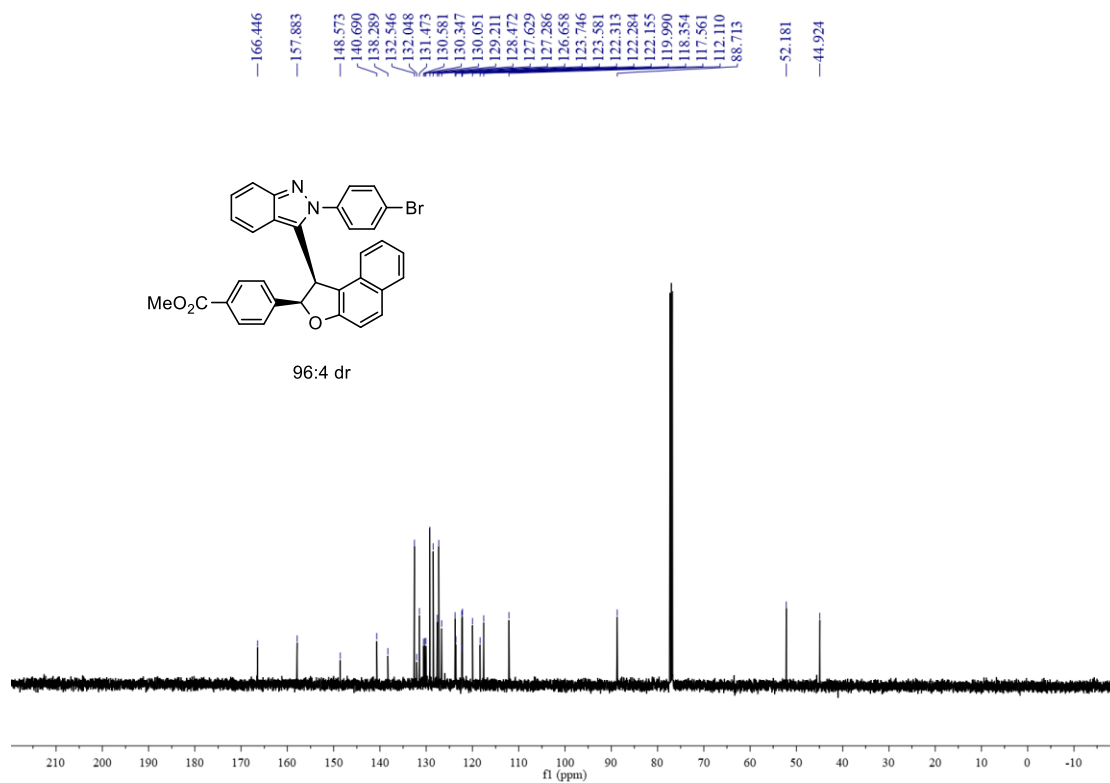

**2-(4-bromophenyl)-3-((1R,2R)-2-(naphthalen-2-yl)-1,2-dihydronaphtho[2,1-b]furan-1-yl)-2H-indazole (4c)**

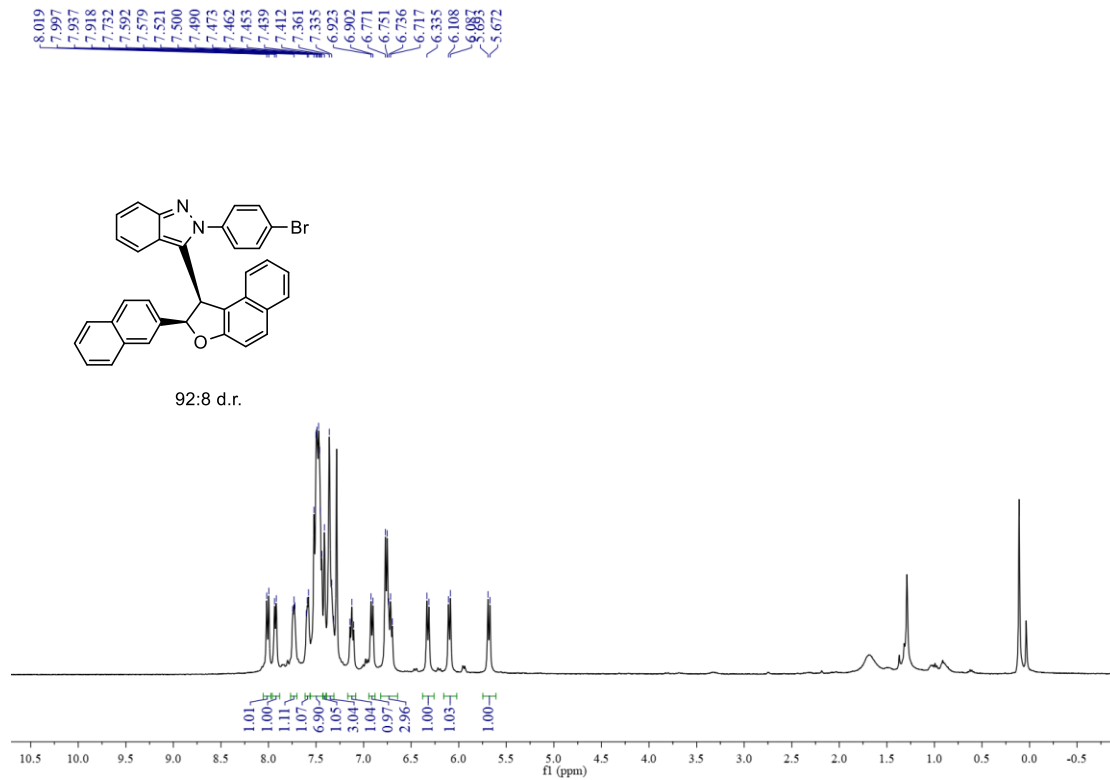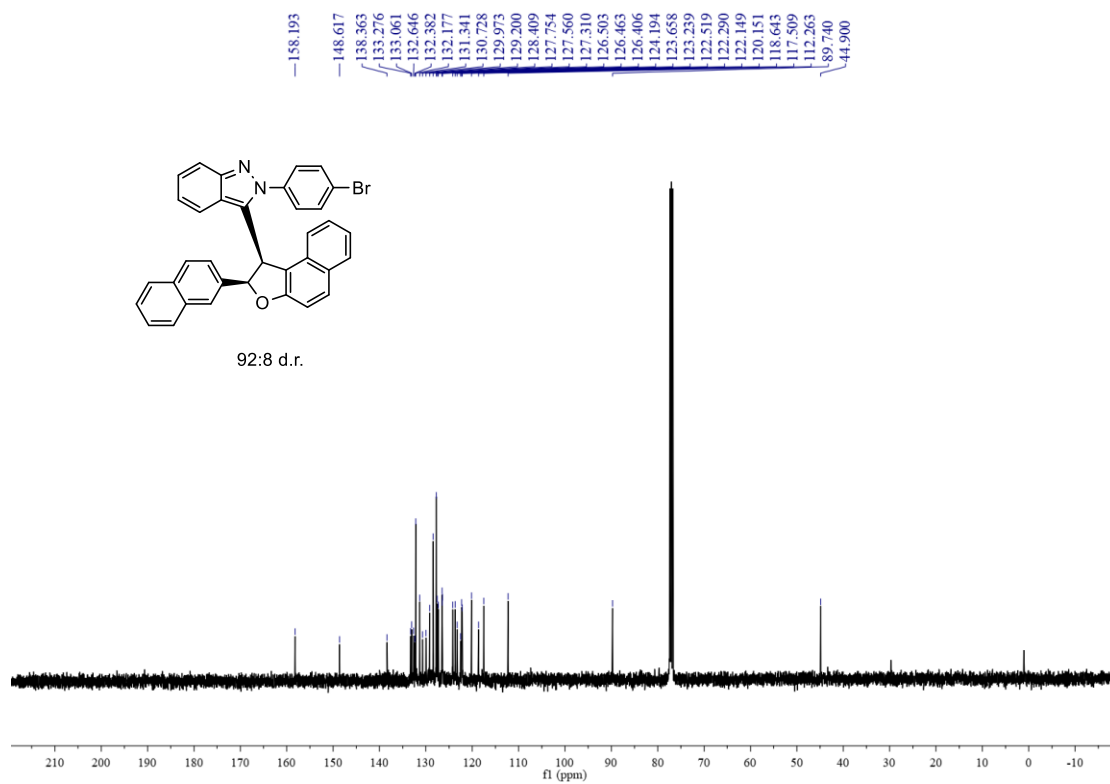

**2-(4-chlorophenyl)-3-((1R,2R)-2-(3,5-dibromophenyl)-1,2-dihydronaphtho[2,1-b]furan-1-yl)-2H-indazole (4d)**

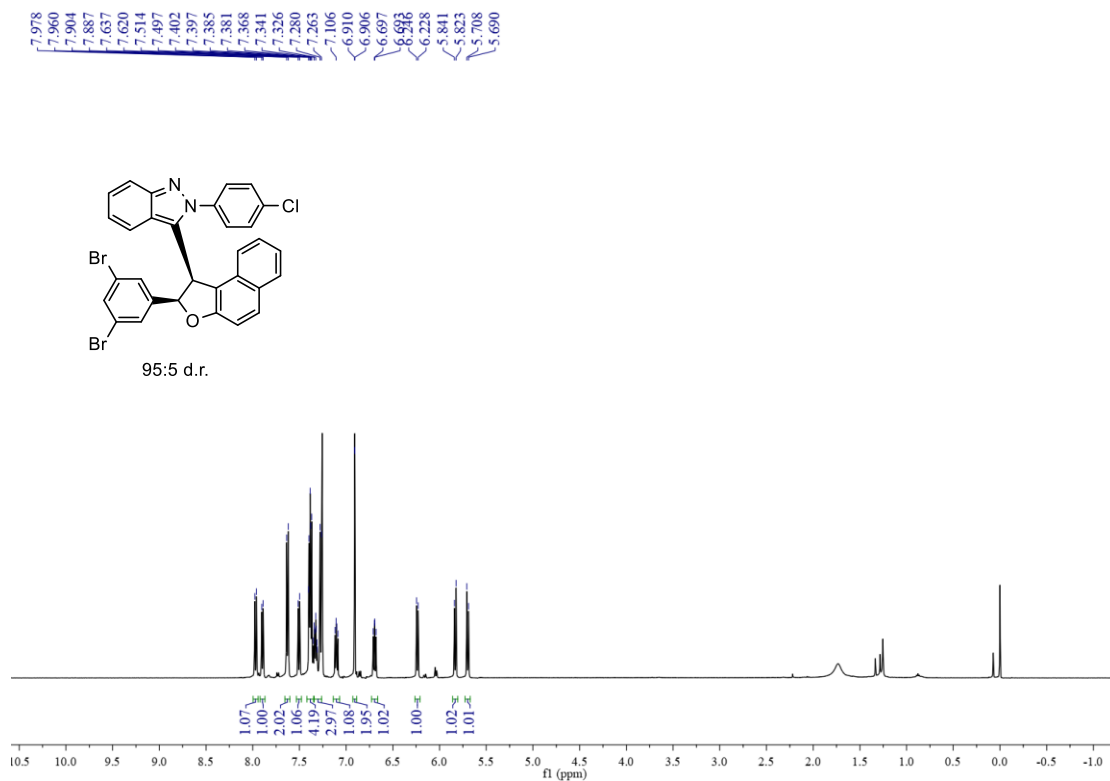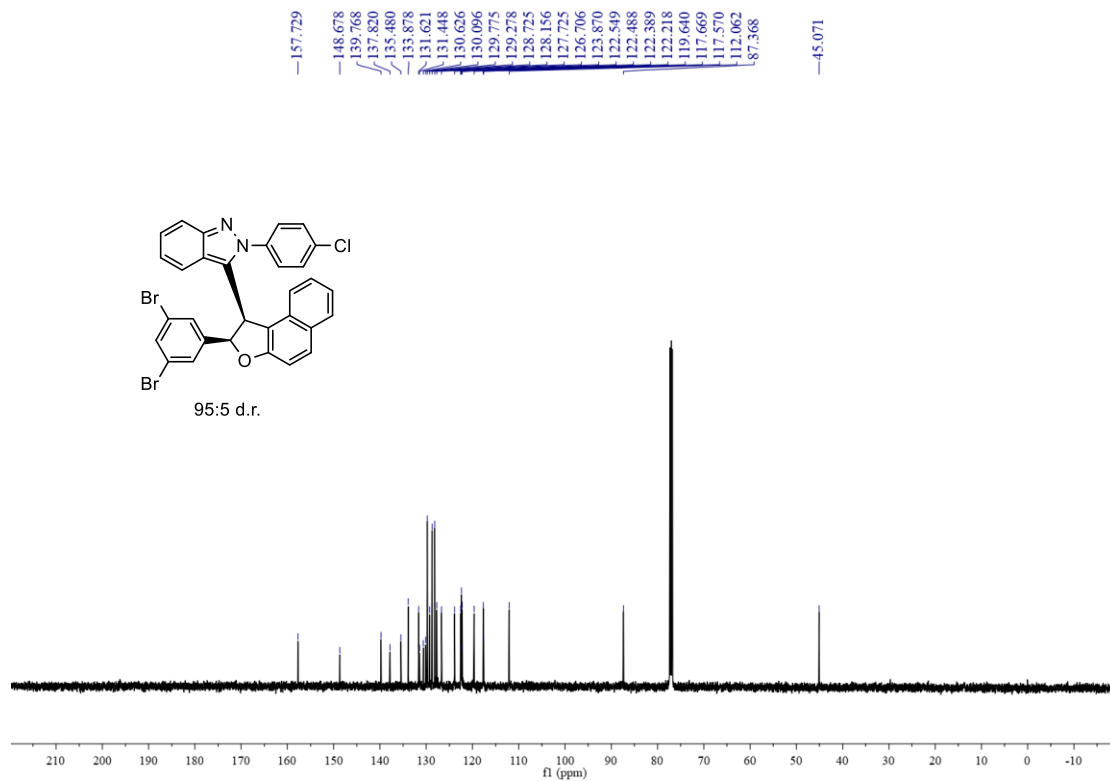

**2-(4-bromophenyl)-3-((1R,2R)-2-(3,5-difluorophenyl)-1,2-dihydronaphtho[2,1-b]furan-1-yl)-2H-indazole (4e)**

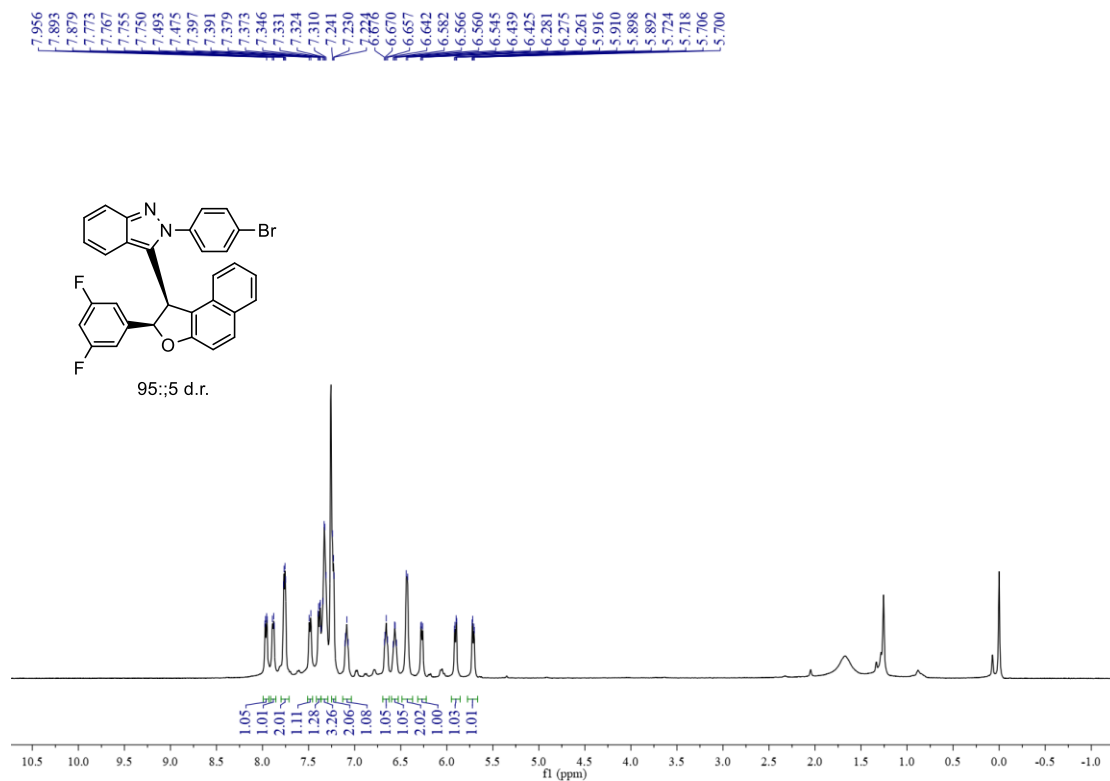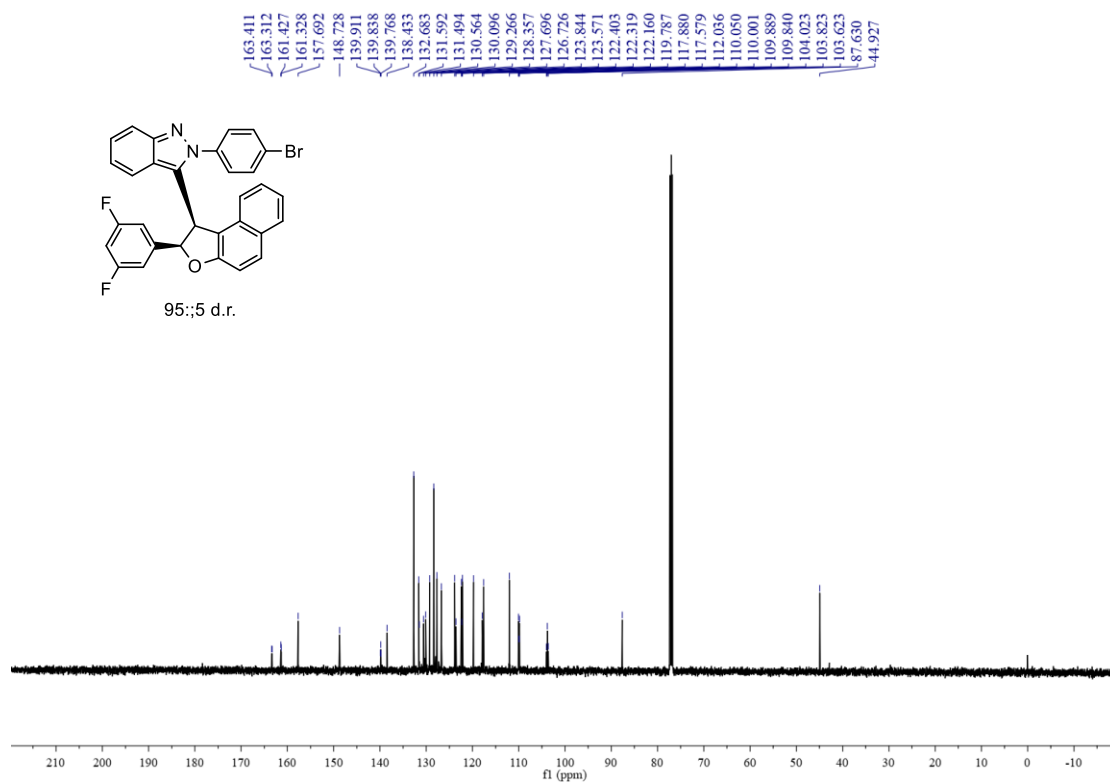

-109.203

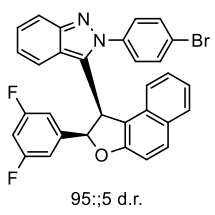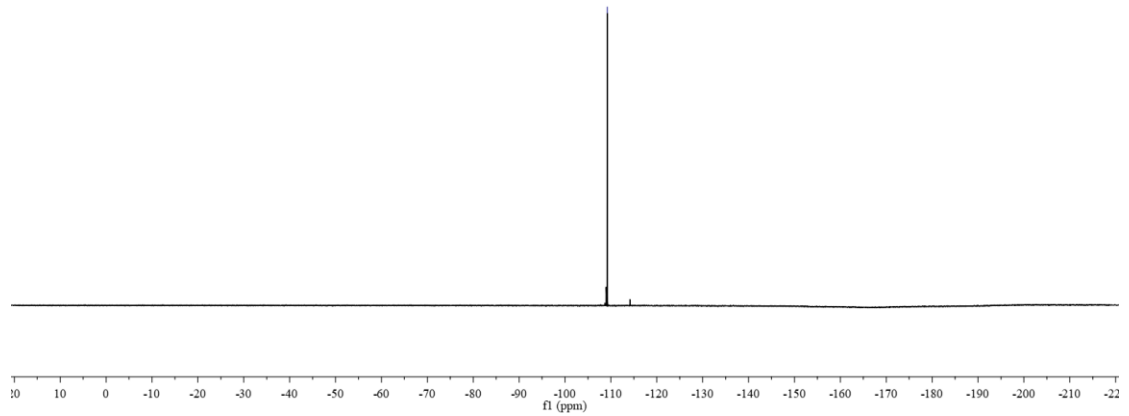

**2-(4-bromophenyl)-3-((1R,2R)-2-(3,5-dichlorophenyl)-1,2-dihydronaphtho[2,1-b]furan-1-yl)-2H-indazole (4f)**

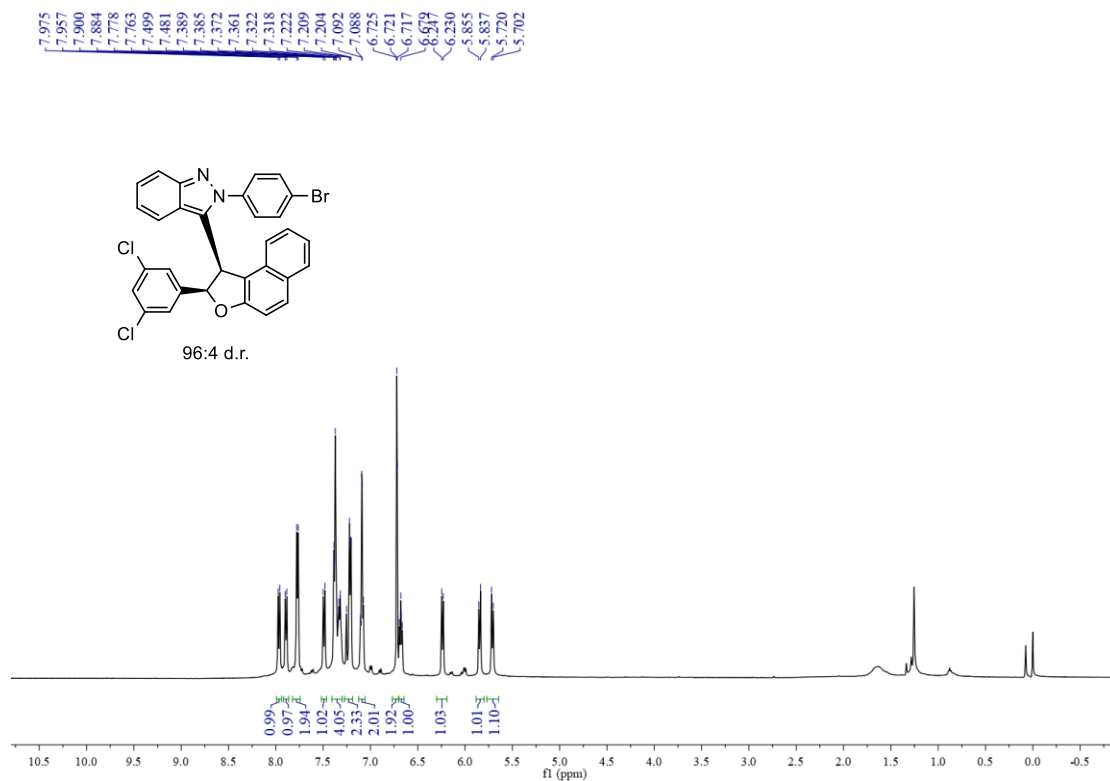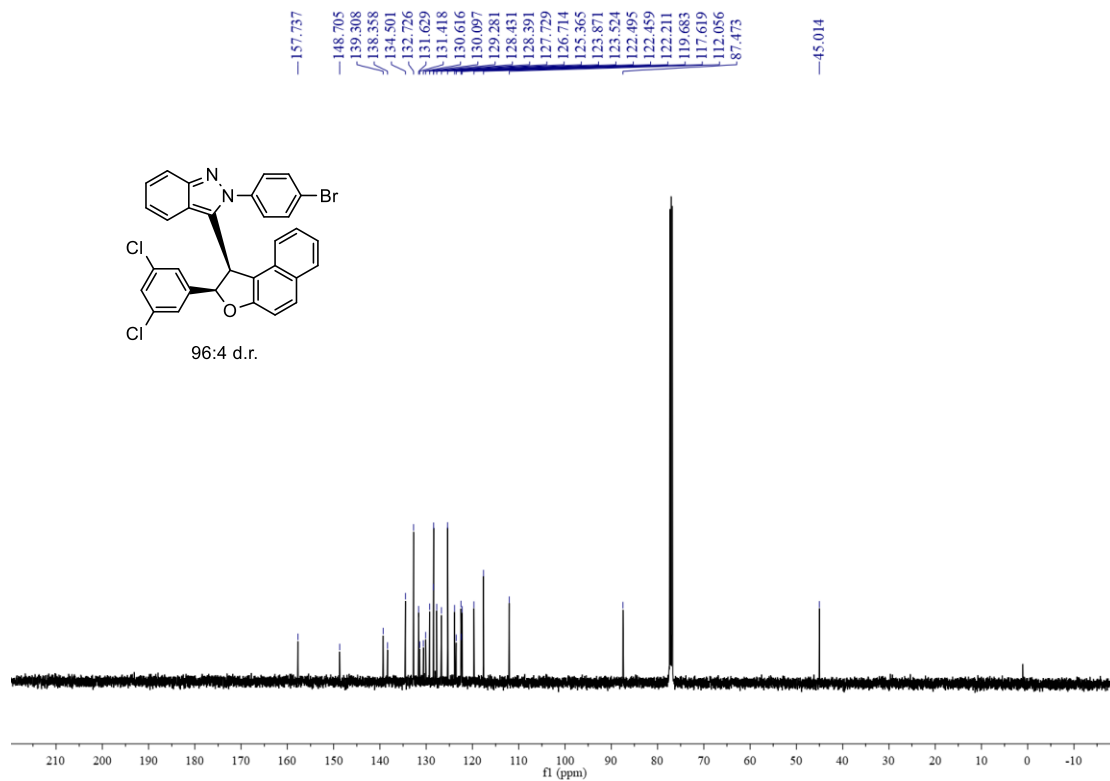

**dimethyl 5-((1*R*,2*R*)-1-(2-(4-bromophenyl)-2*H*-indazol-3-yl)-1,2-dihydronaphtho[2,1-*b*]furan-2-yl)-isophthalate (4g)**

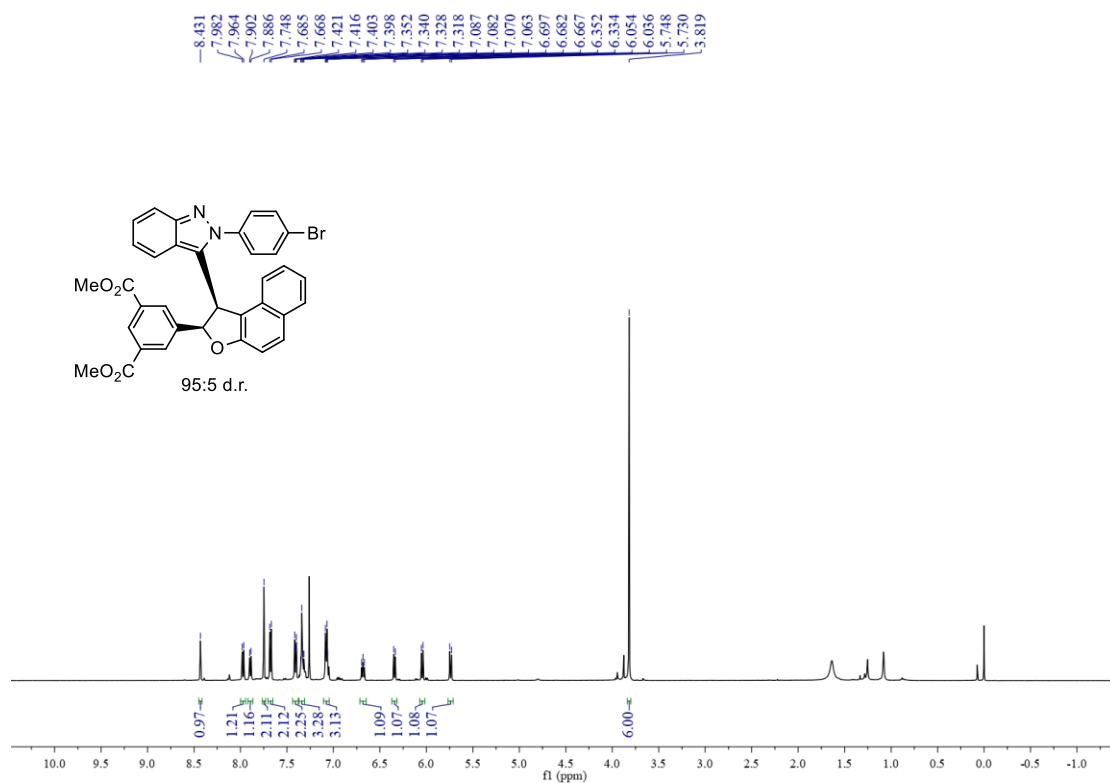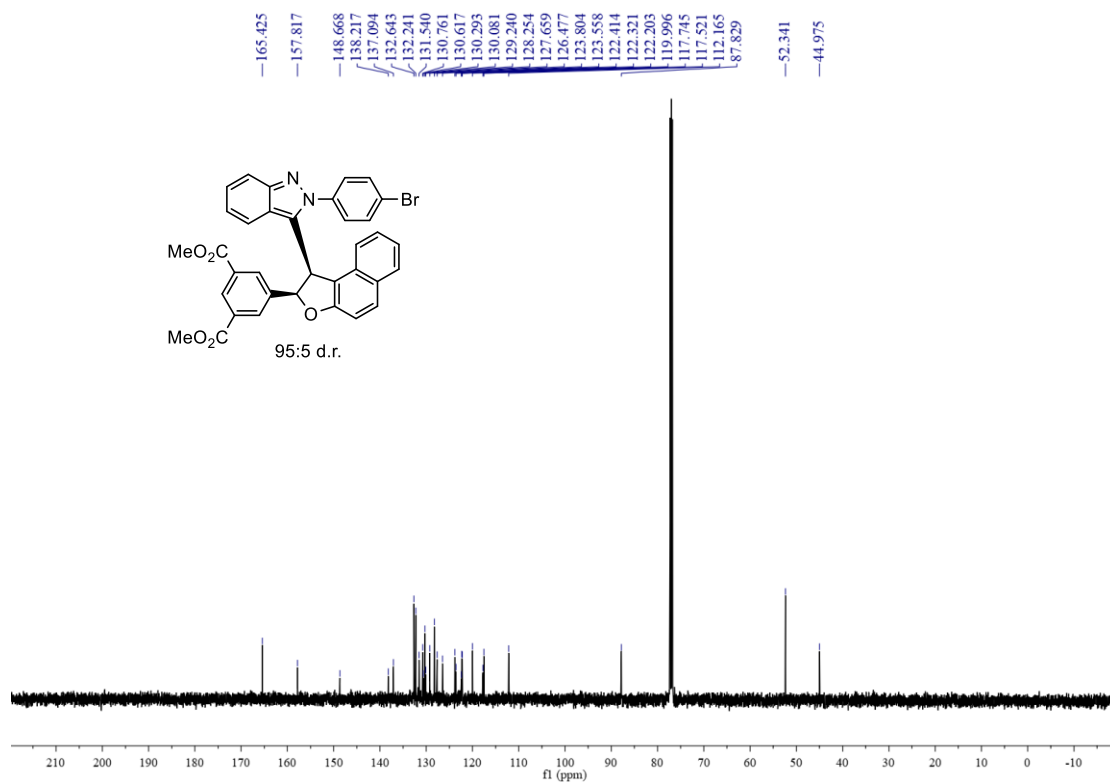



**2-(4-bromophenyl)-3-((1R,2R)-2-(3,5-dimethoxyphenyl)-1,2-dihydronaphtho[2,1-b]furan-1-yl)-2H-indazole (4h)**

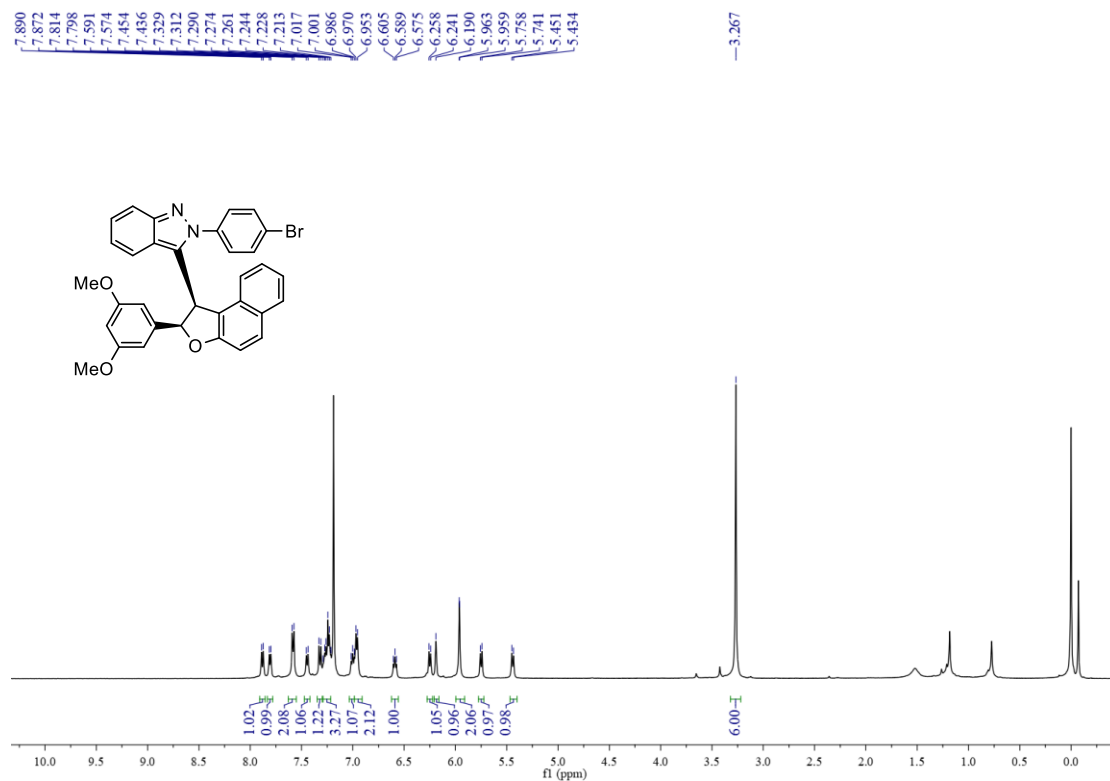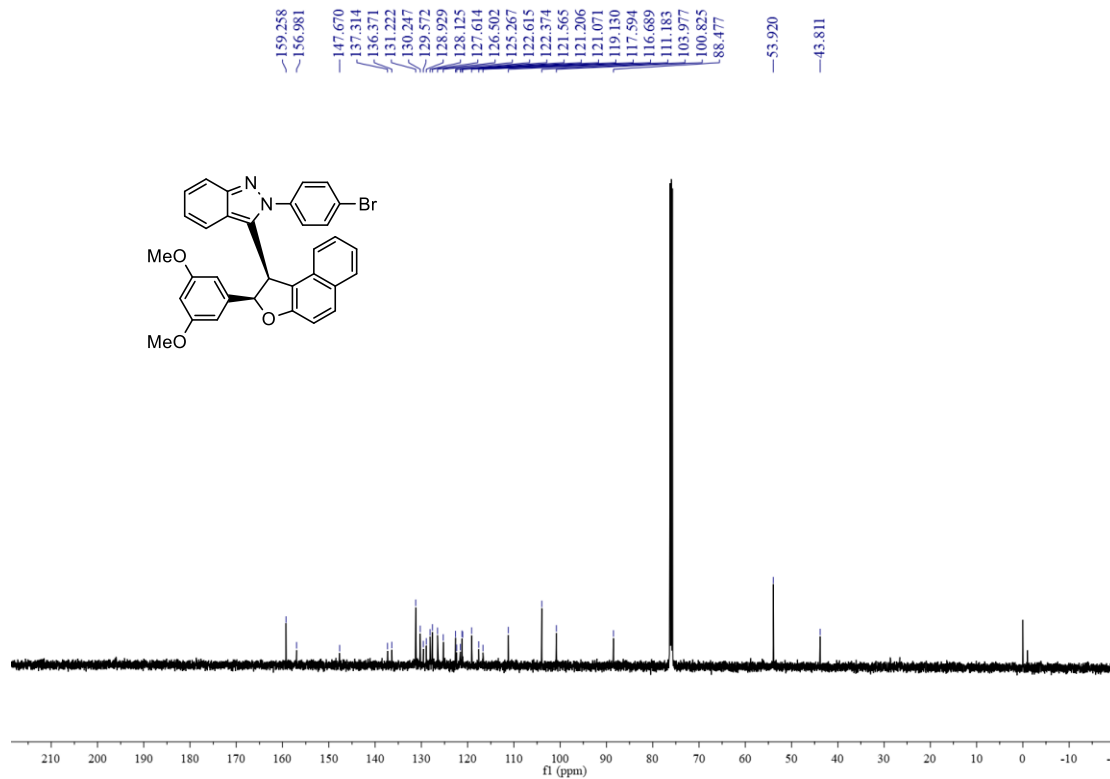

**2-(4-bromophenyl)-3-(2-(naphthalen-2-yl)benzofuran-3-yl)-2H-indazole**

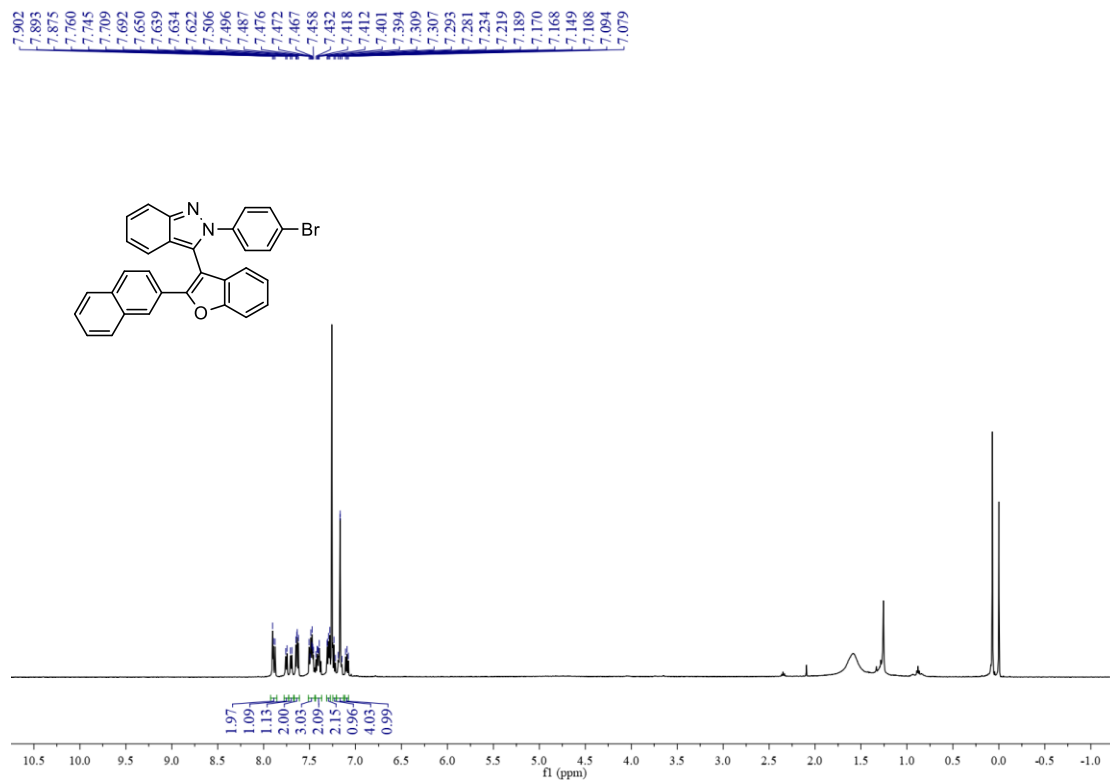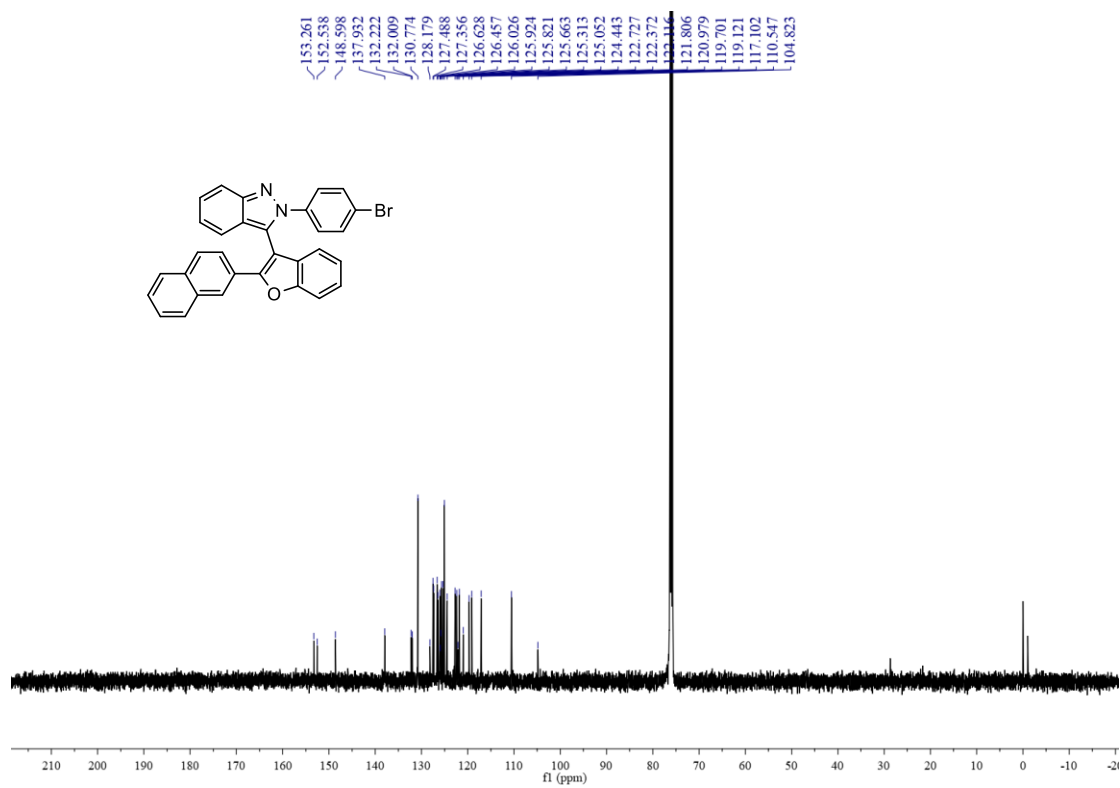

2-(4-bromophenyl)-3-(2-phenylnaphtho[2,1-b]furan-1-yl)-2H-indazole (5a)

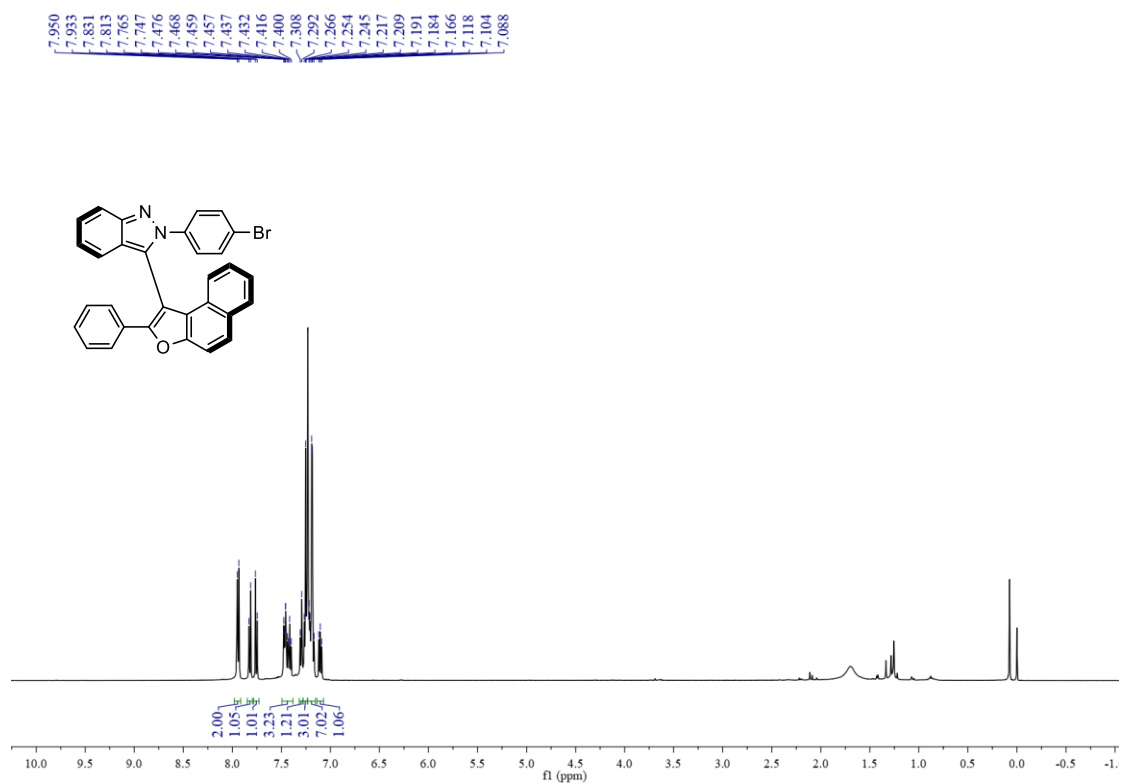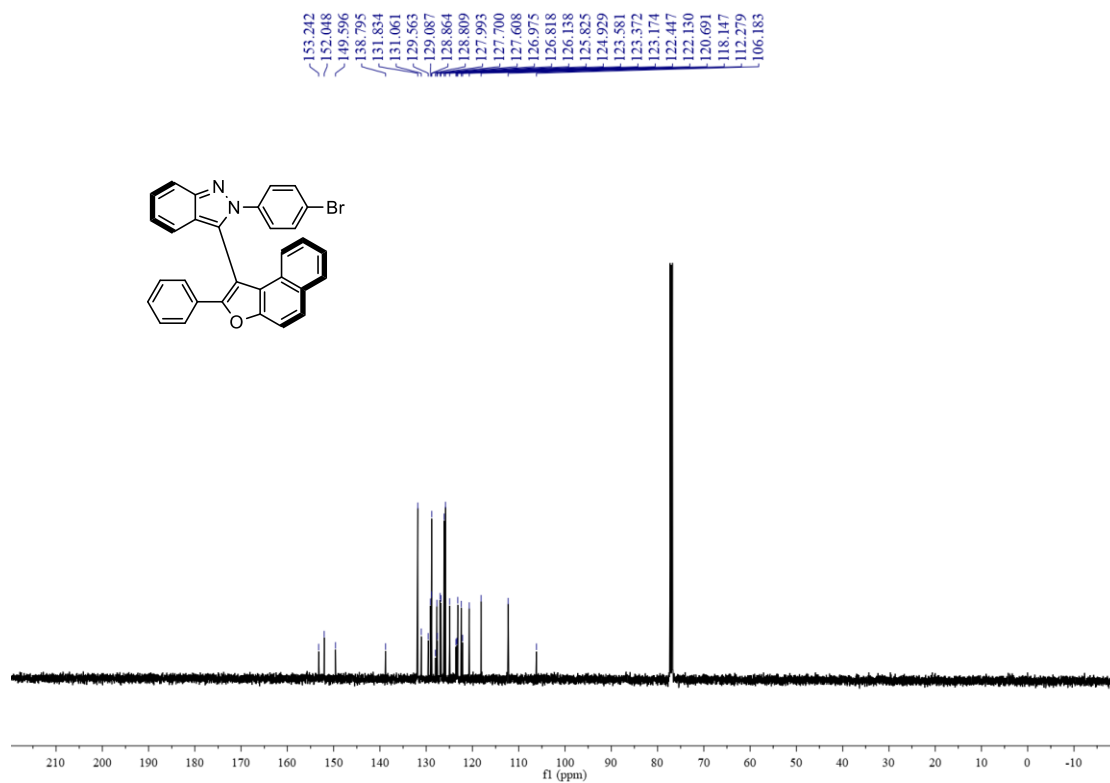

*methyl 4-(1-(2-(4-bromophenyl)-2H-indazol-3-yl)naphtho[2,1-b]furan-2-yl)benzoate (5b)*

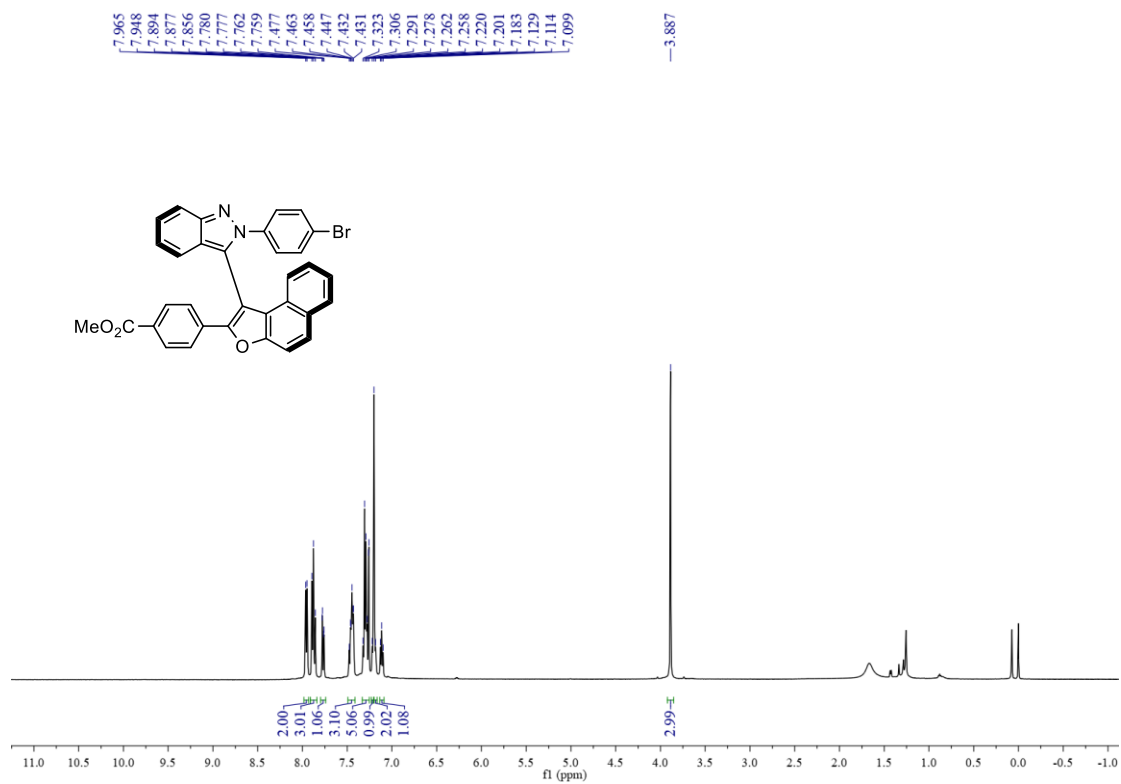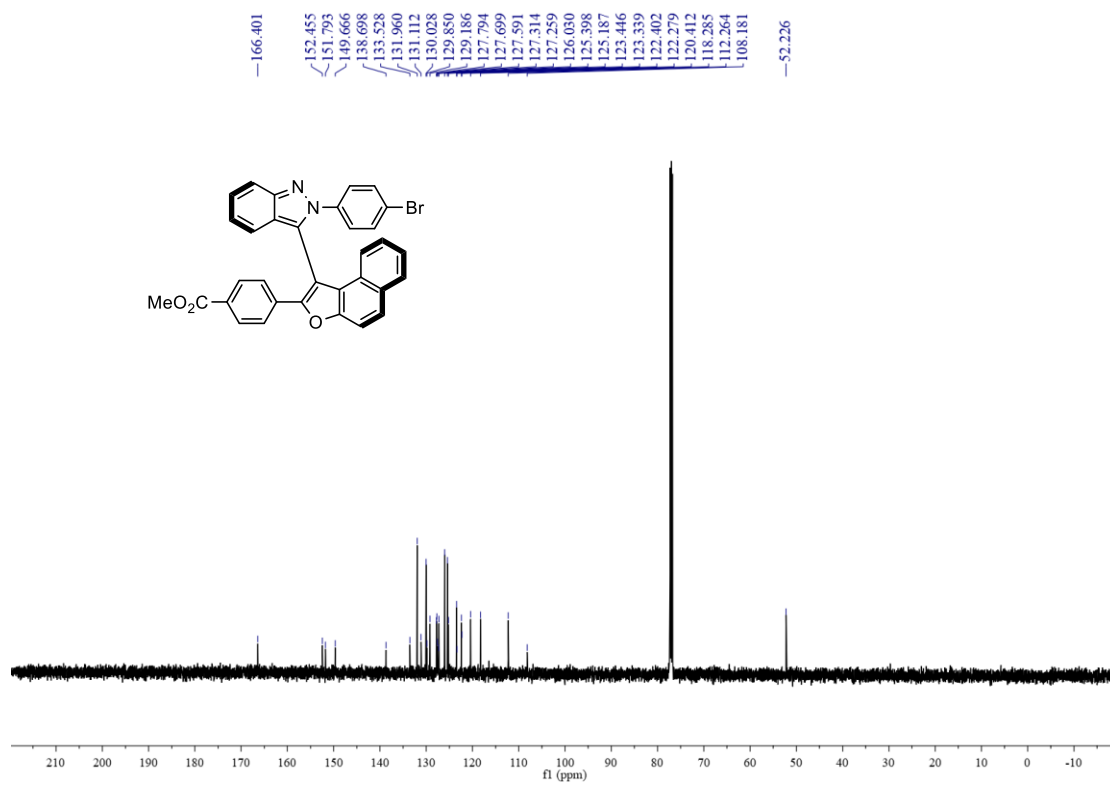

**2-(4-bromophenyl)-3-(2-(naphthalen-2-yl)naphtho[2,1-b]furan-1-yl)-2H-indazole (5c)**

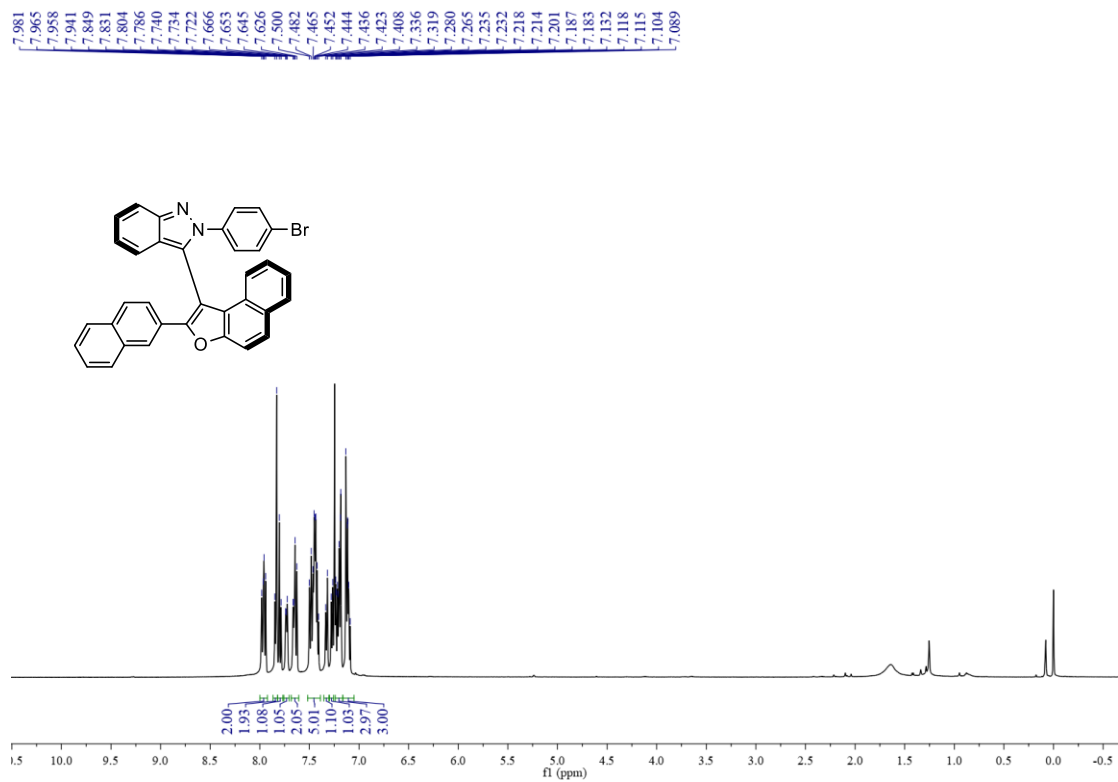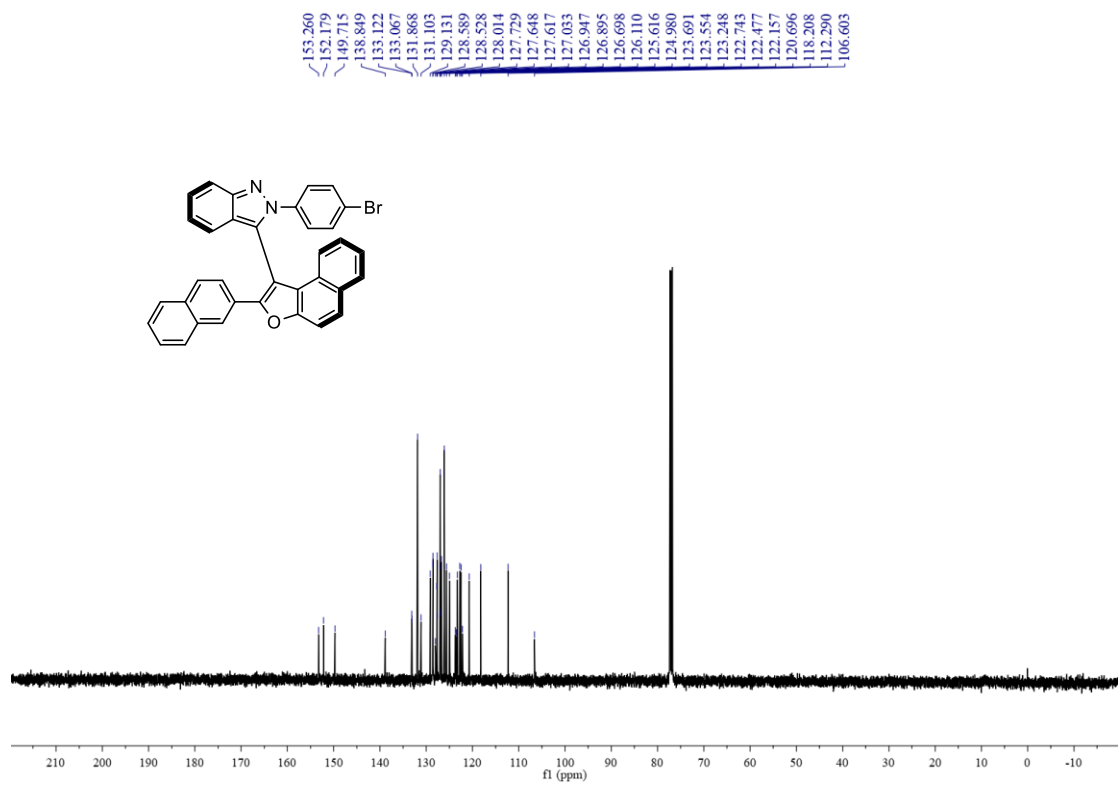

2-(4-chlorophenyl)-3-(2-(3,5-dibromophenyl)naphtho[2,1-b]furan-1-yl)-2H-indazole (5d)

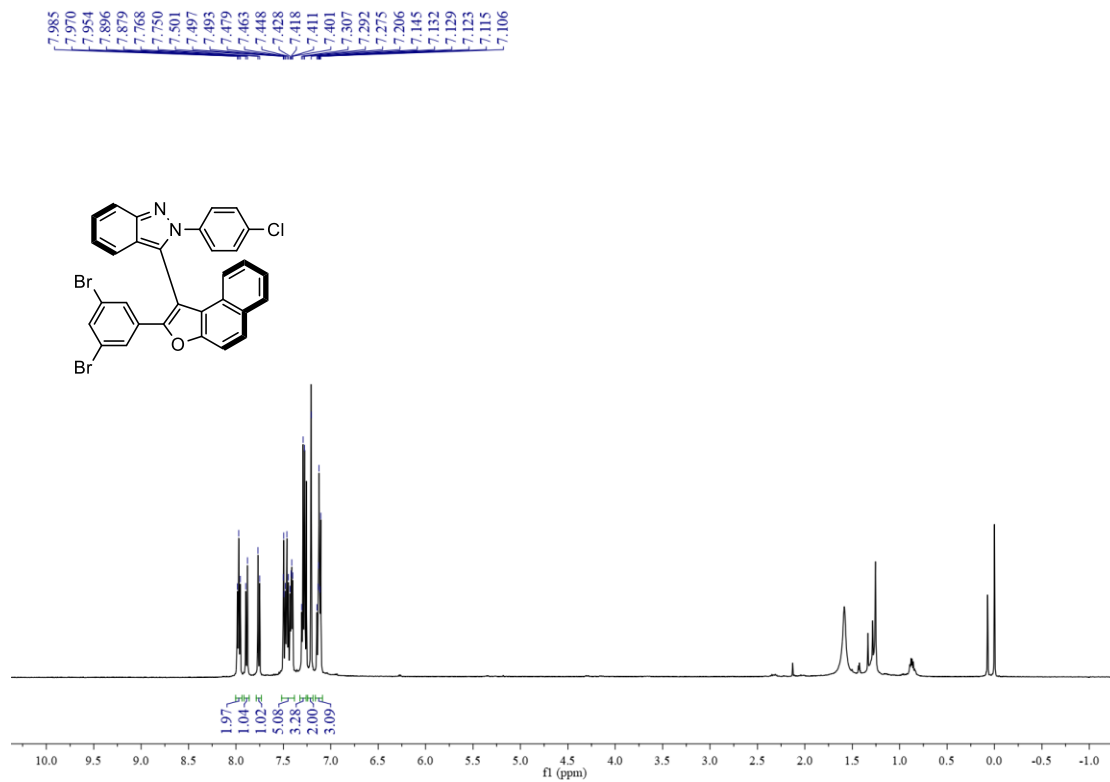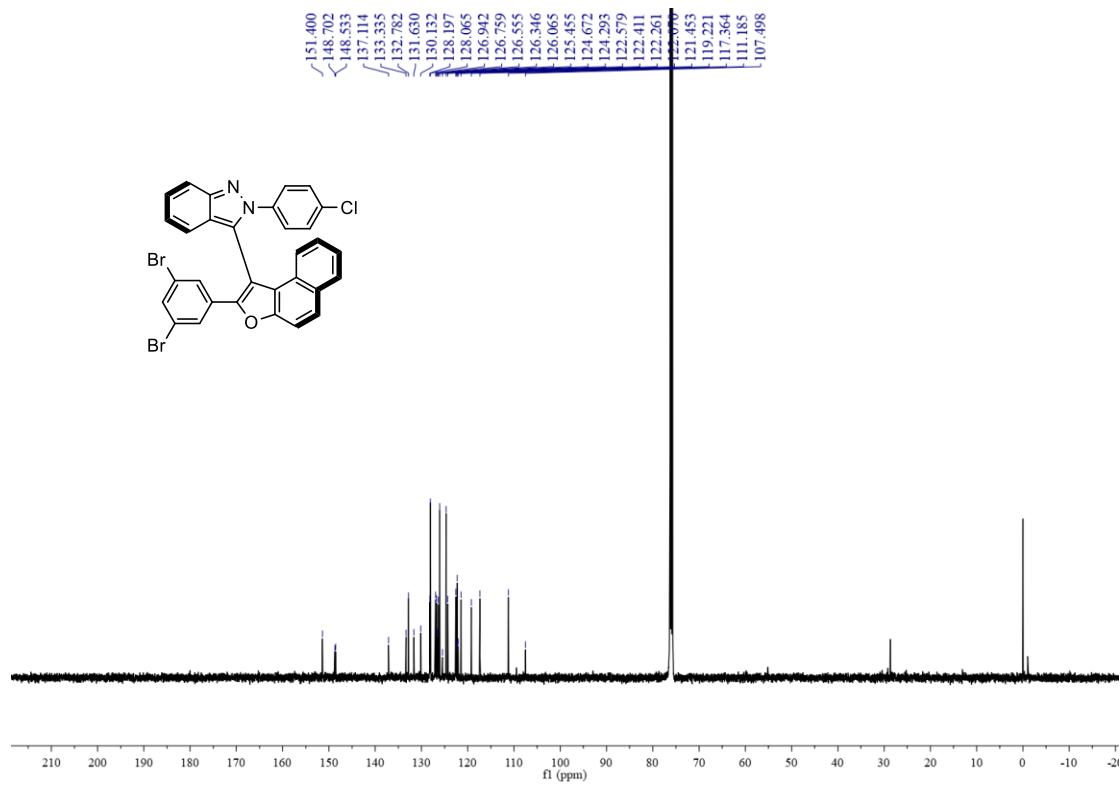

2-(4-bromophenyl)-3-(2-(3,5-difluorophenyl)naphtho[2,1-b]furan-1-yl)-2H-indazole (5e)

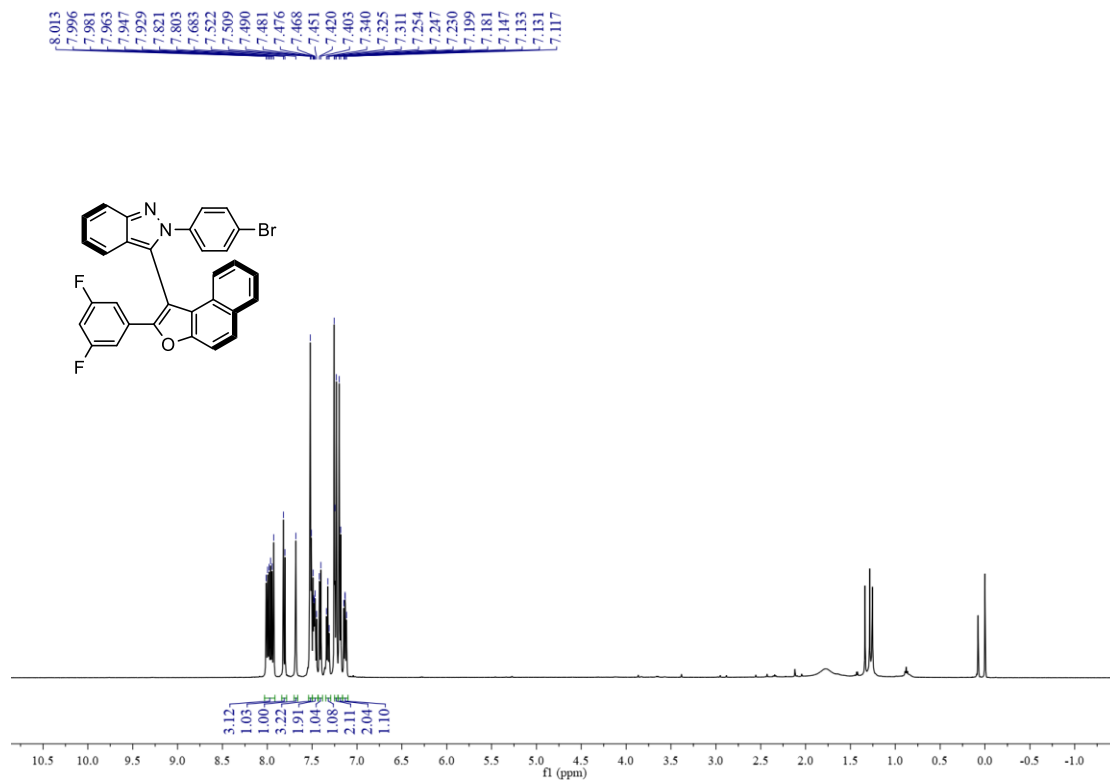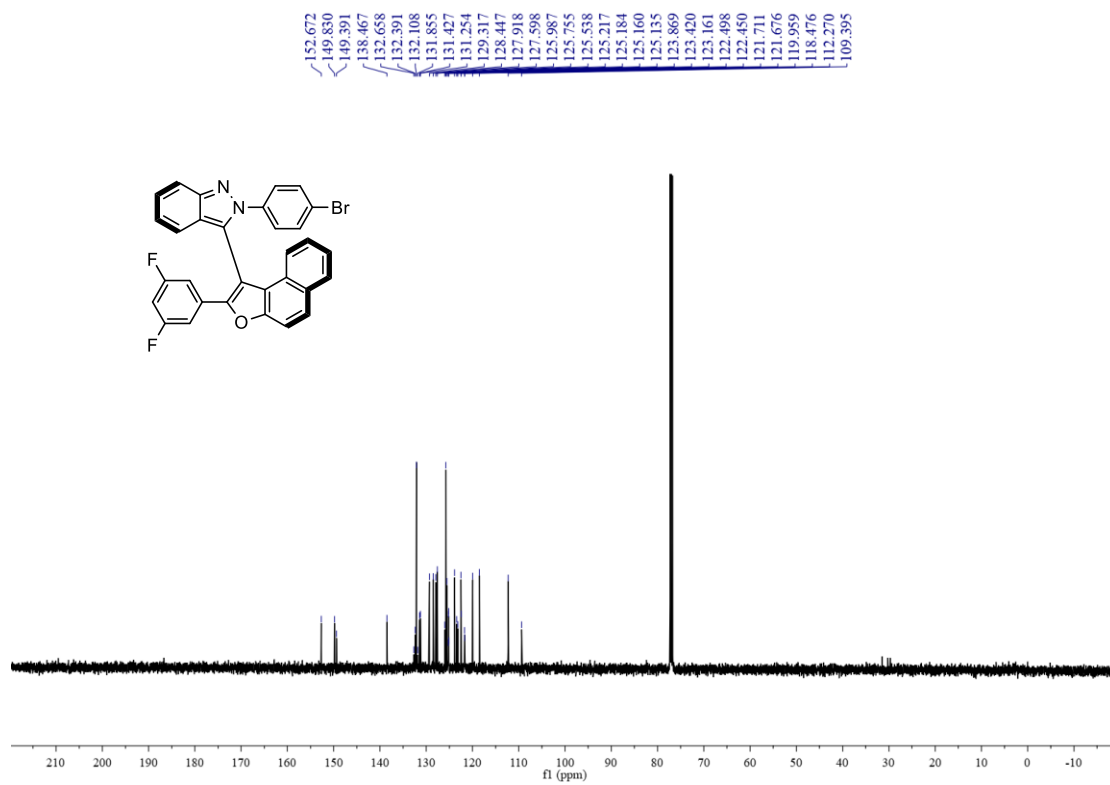

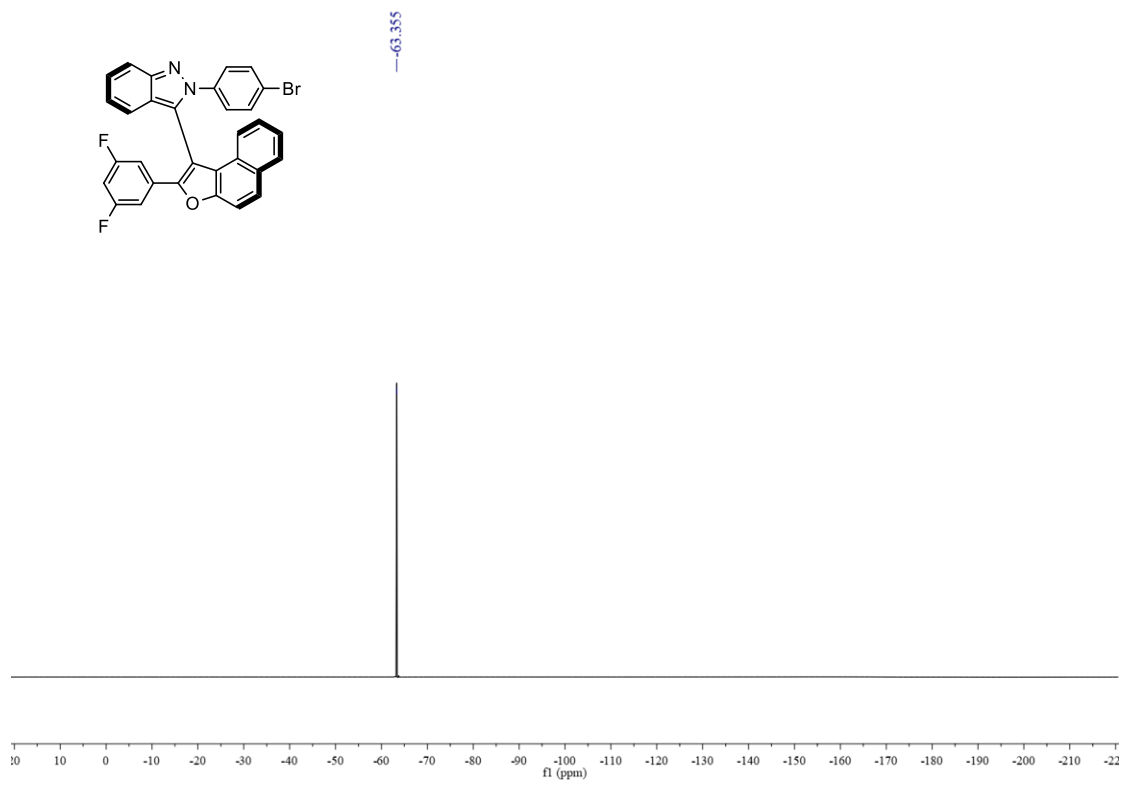



2-(4-bromophenyl)-3-(2-(3,5-dichlorophenyl)naphtho[2,1-b]furan-1-yl)-2H-indazole (5f)

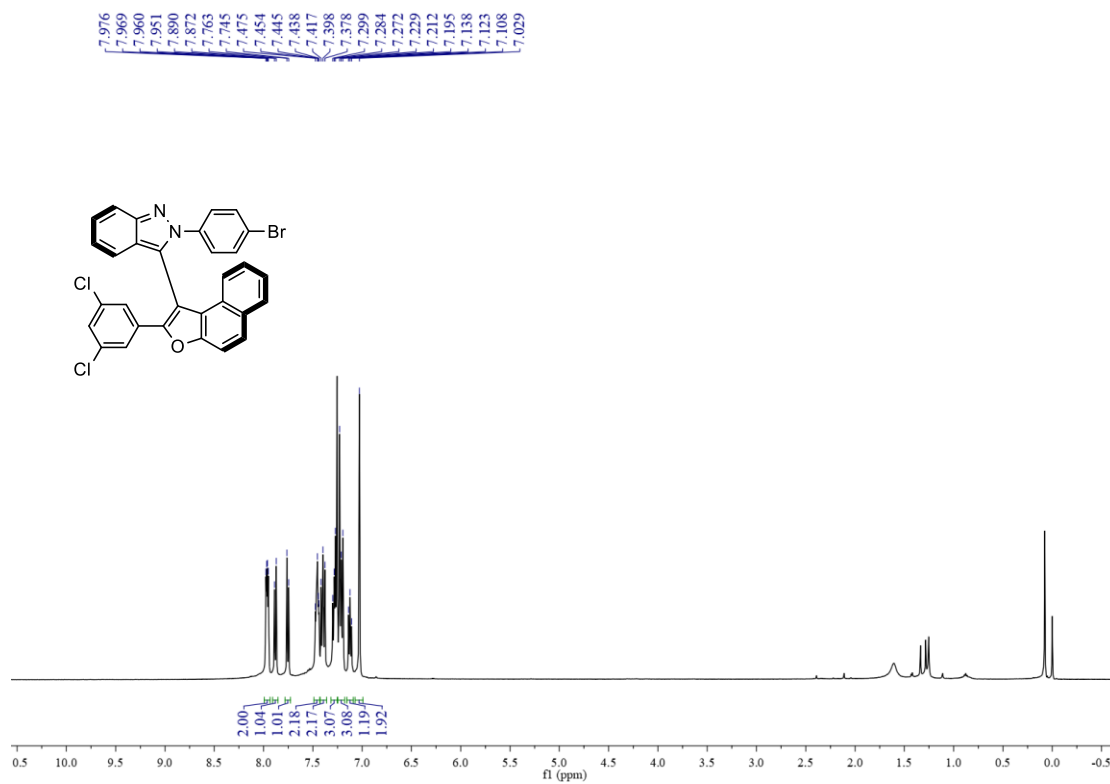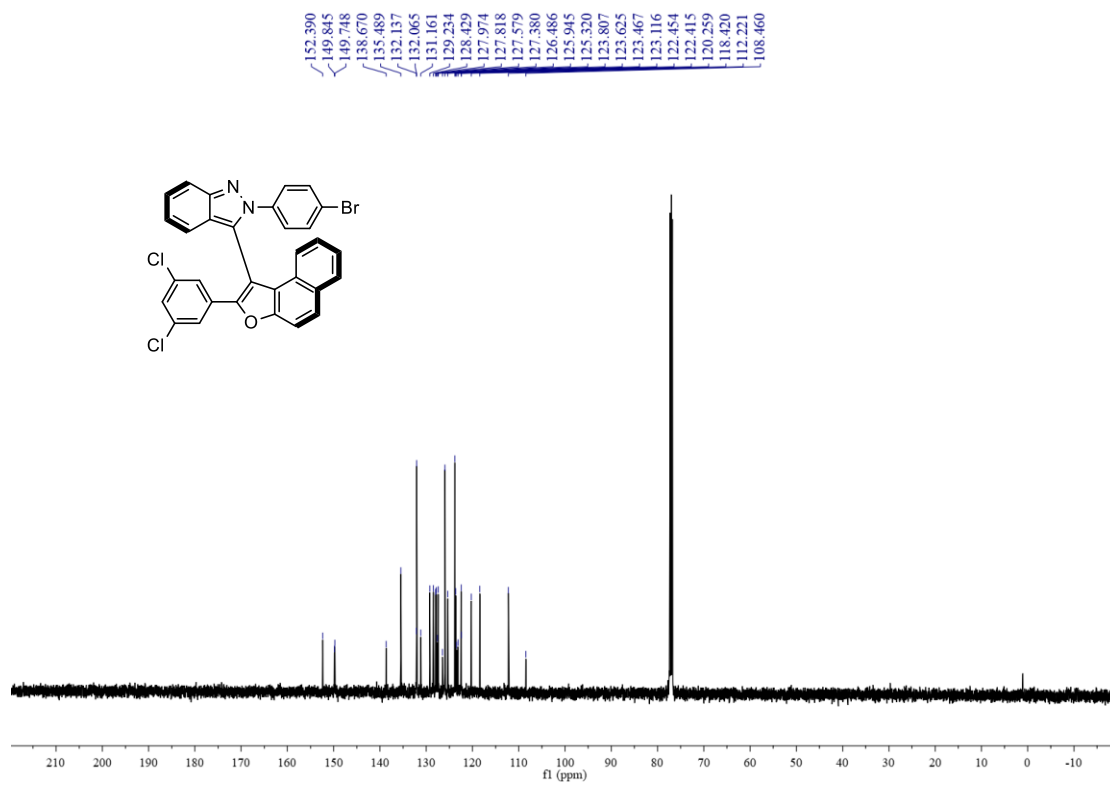

*dimethyl 5-(1-(2-(4-bromophenyl)-2H-indazol-3-yl)naphtho[2,1-b]furan-2-yl)isophthalate (5g)*

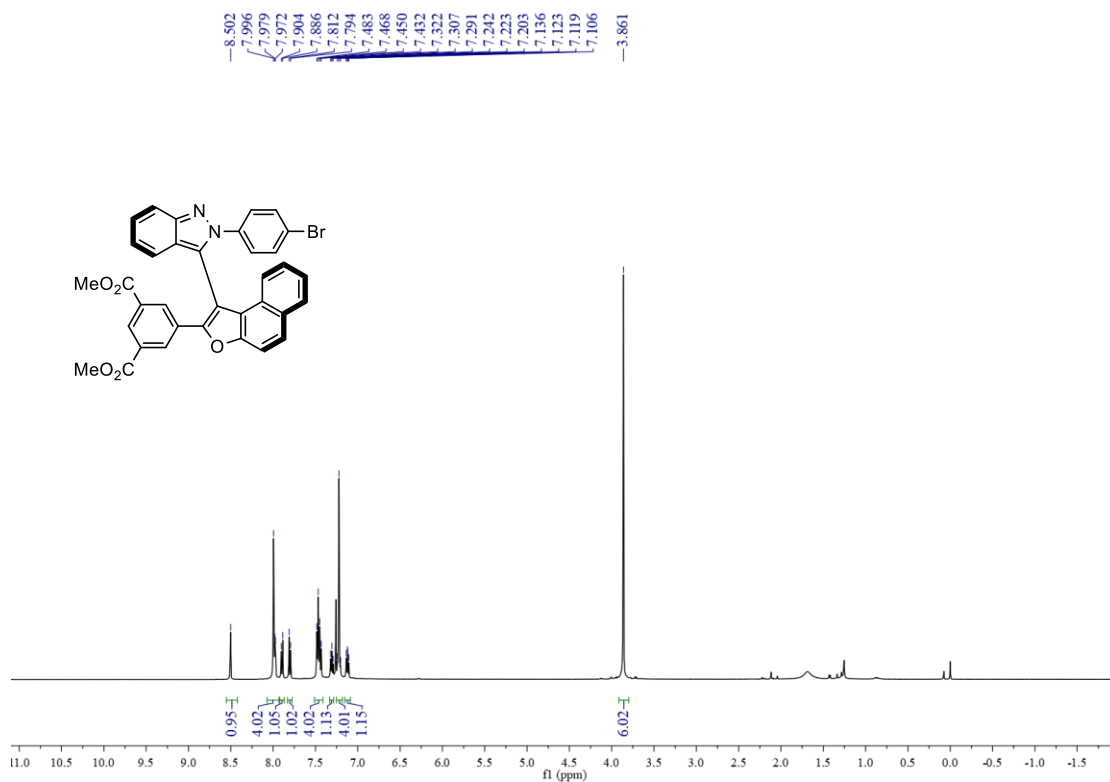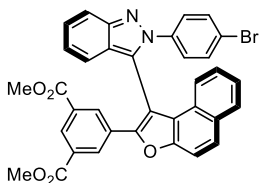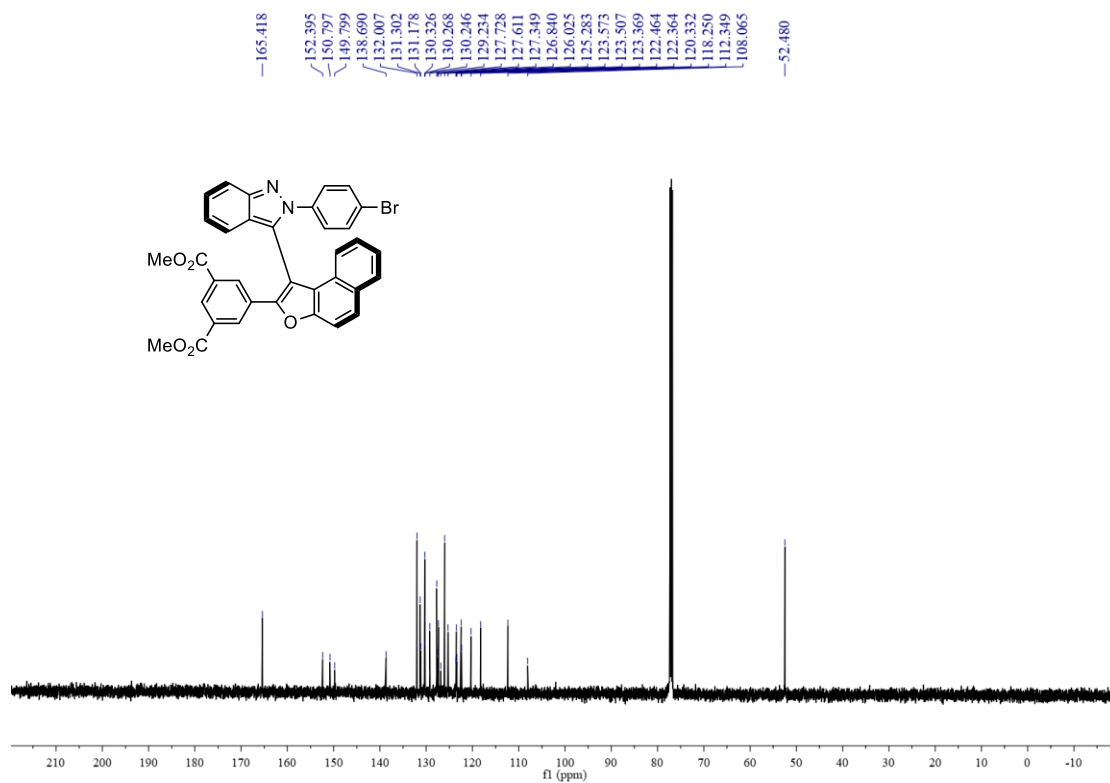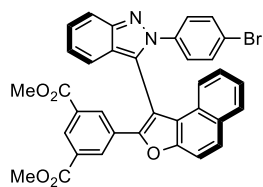

**2-(4-bromophenyl)-3-(2-(3,5-dimethoxyphenyl)naphtho[2,1-b]furan-1-yl)-2H-indazole (5h)**

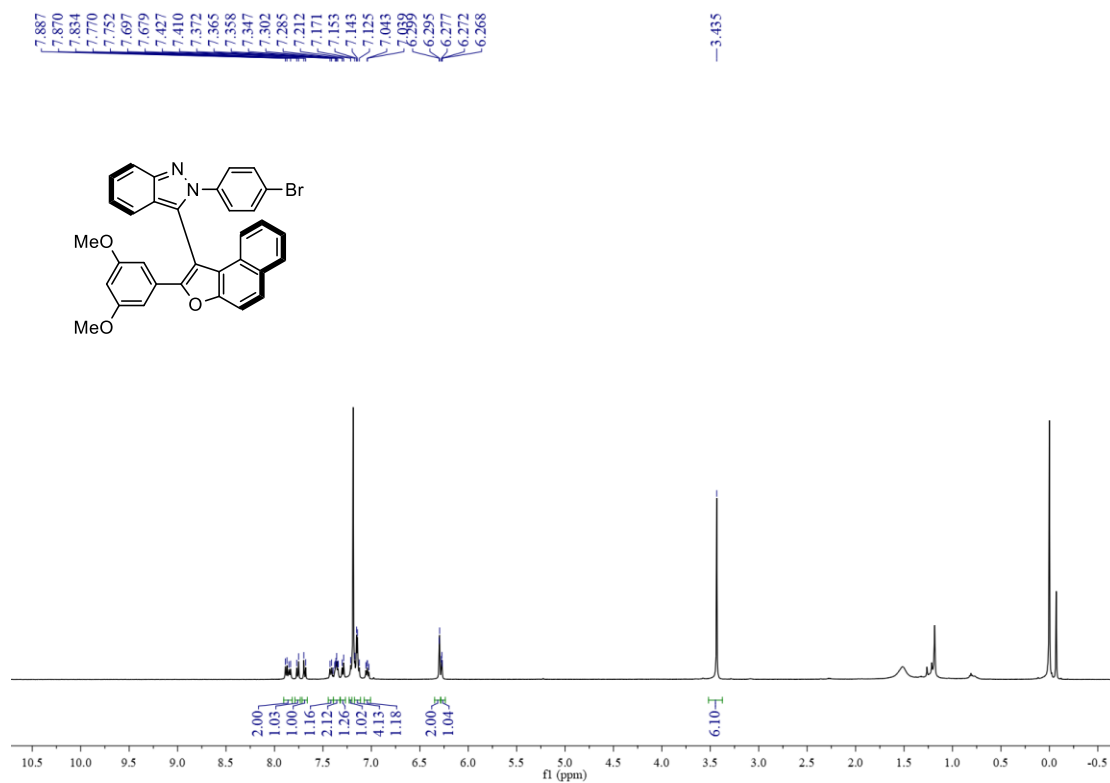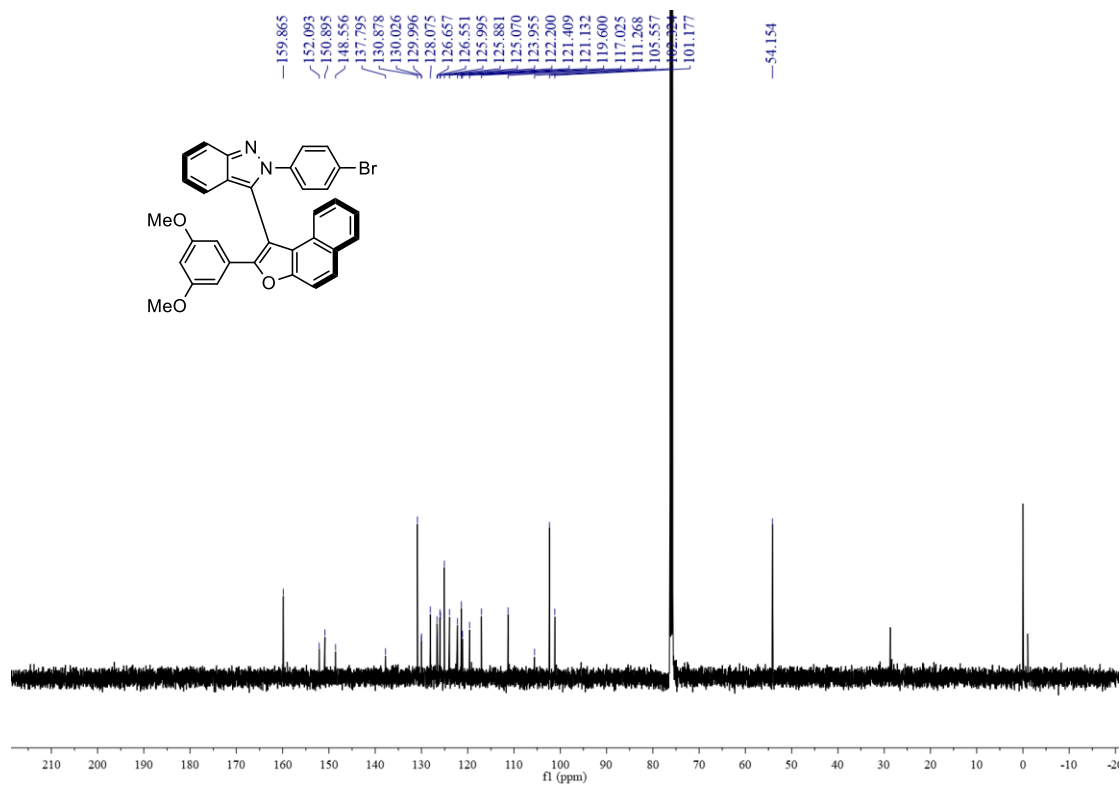

2-((*E*)-oct-4-en-4-yl)phenyl-3-((2*R*,3*R*)-2-phenyl-2,3-dihydrobenzofuran-3-yl)-2*H*-indazole (6a)

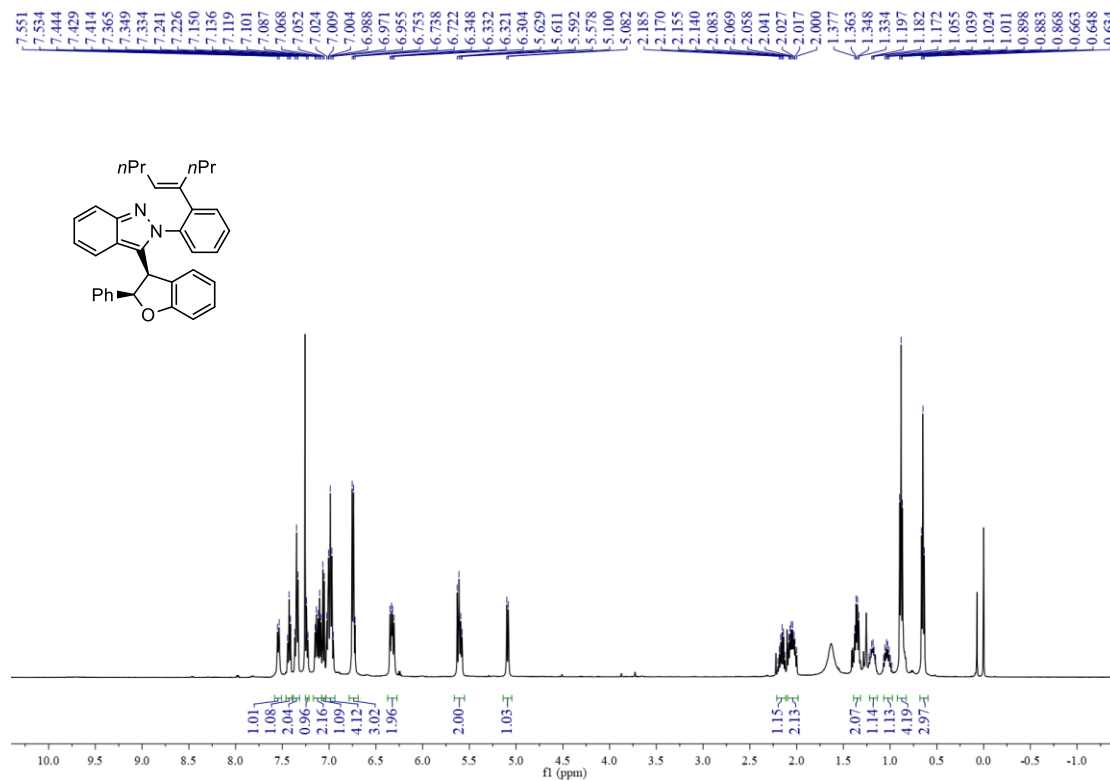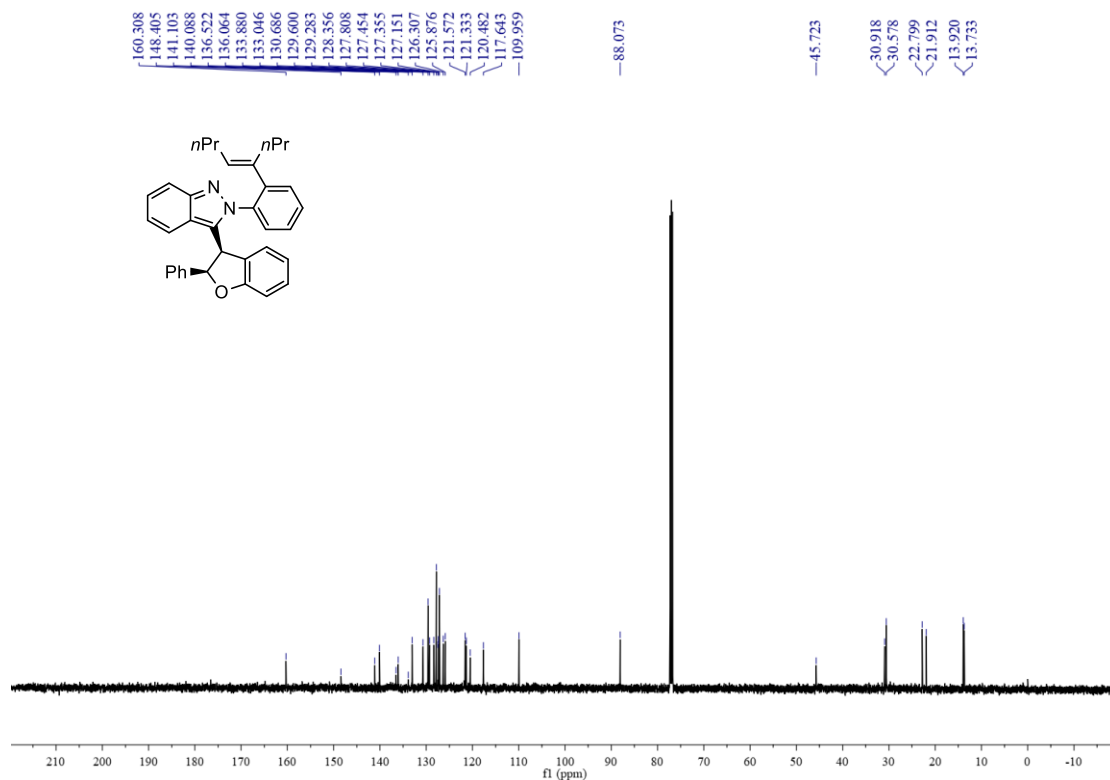

2-(2-allylphenyl)-3-((2R,3R)-2-phenyl-2,3-dihydrobenzofuran-3-yl)-2H-indazole (6b)

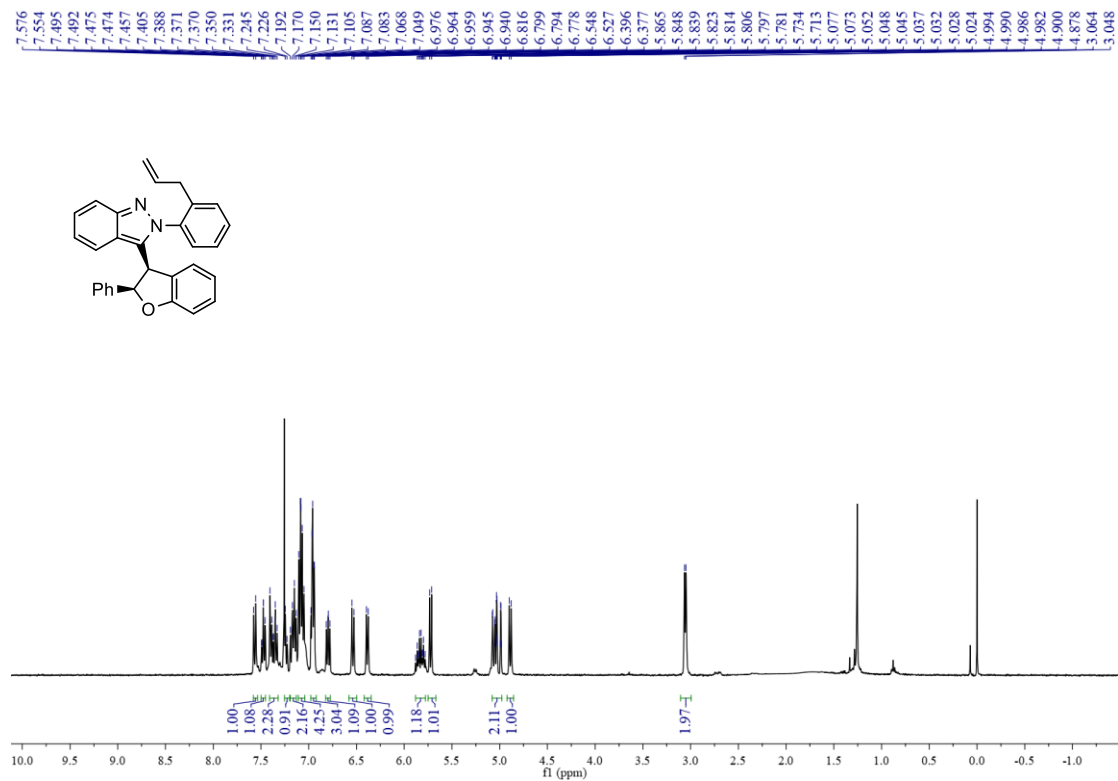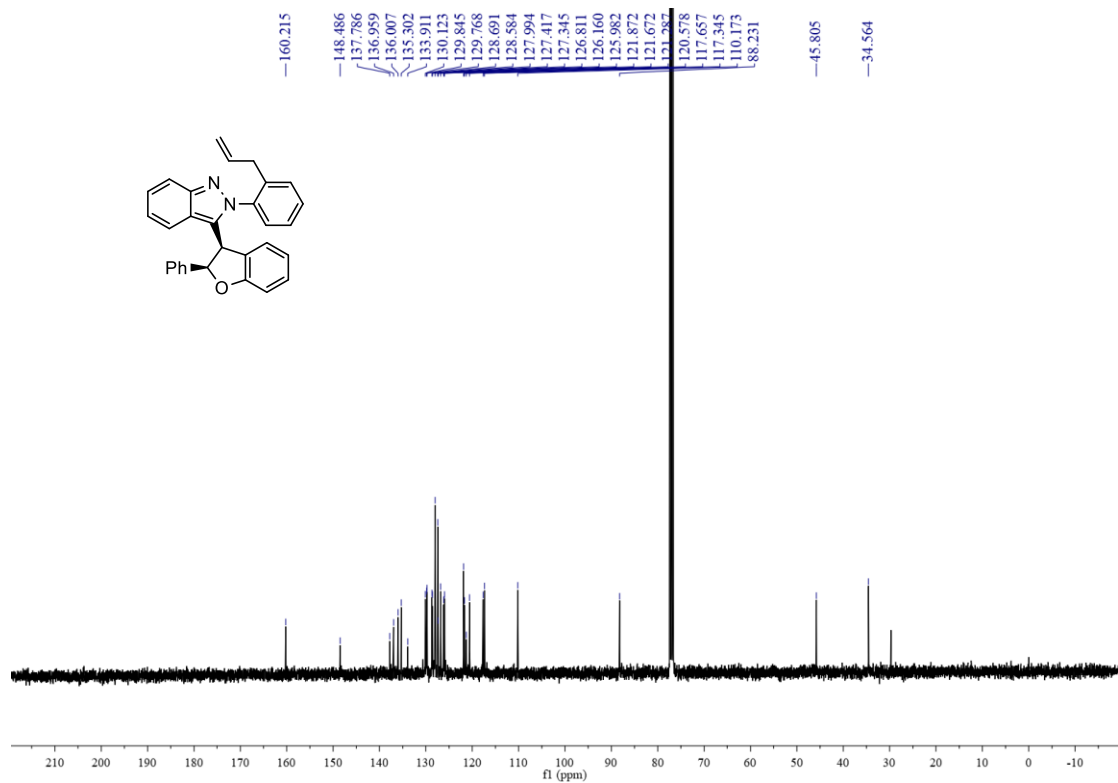

**3-((2R,3R)-2-phenyl-2,3-dihydrobenzofuran-3-yl)-2-((triisopropylsilyl)ethynyl)phenyl)-2H-indazole (6c)**

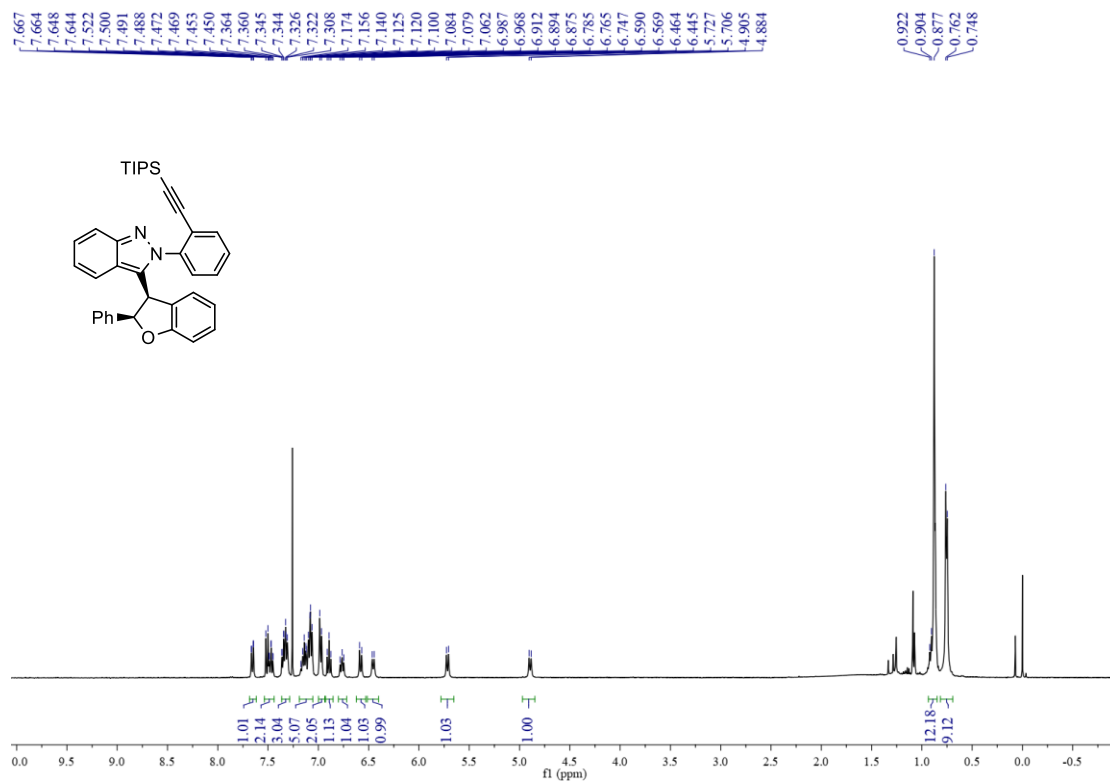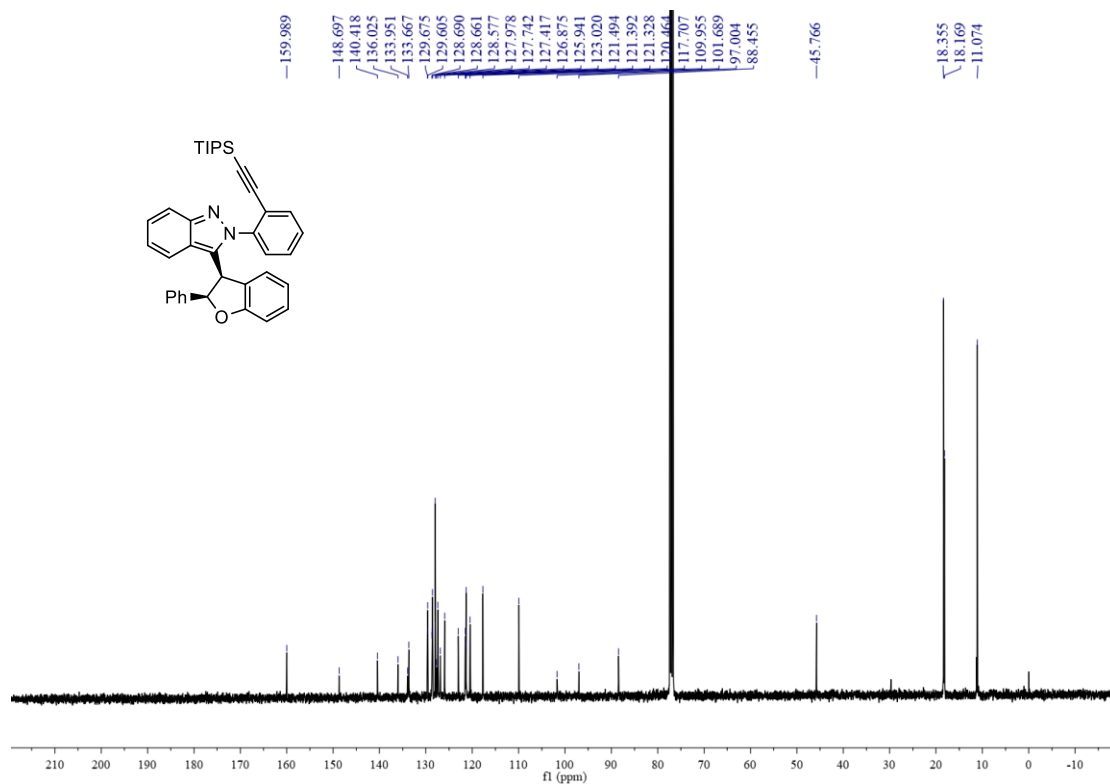

**1-phenyl-3-(2-(3-((2R,3R)-2-phenyl-2,3-dihydrobenzofuran-3-yl)-2H-indazol-2-yl)phenyl)propan-1-one (6d)**

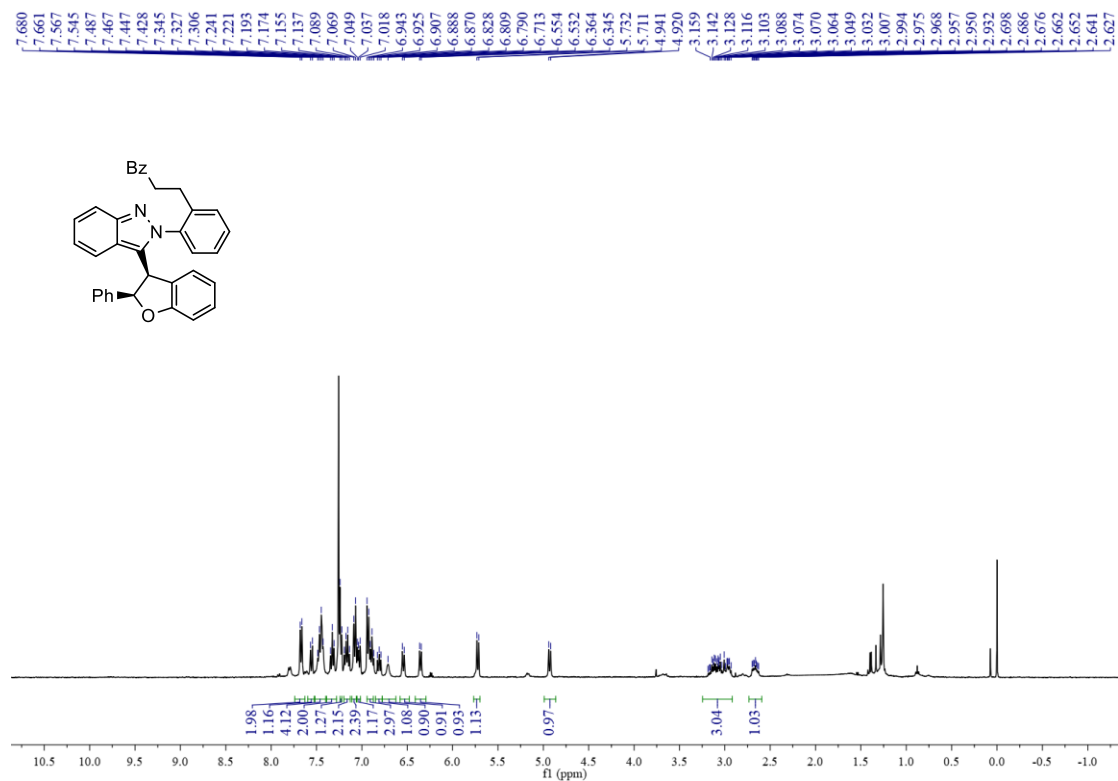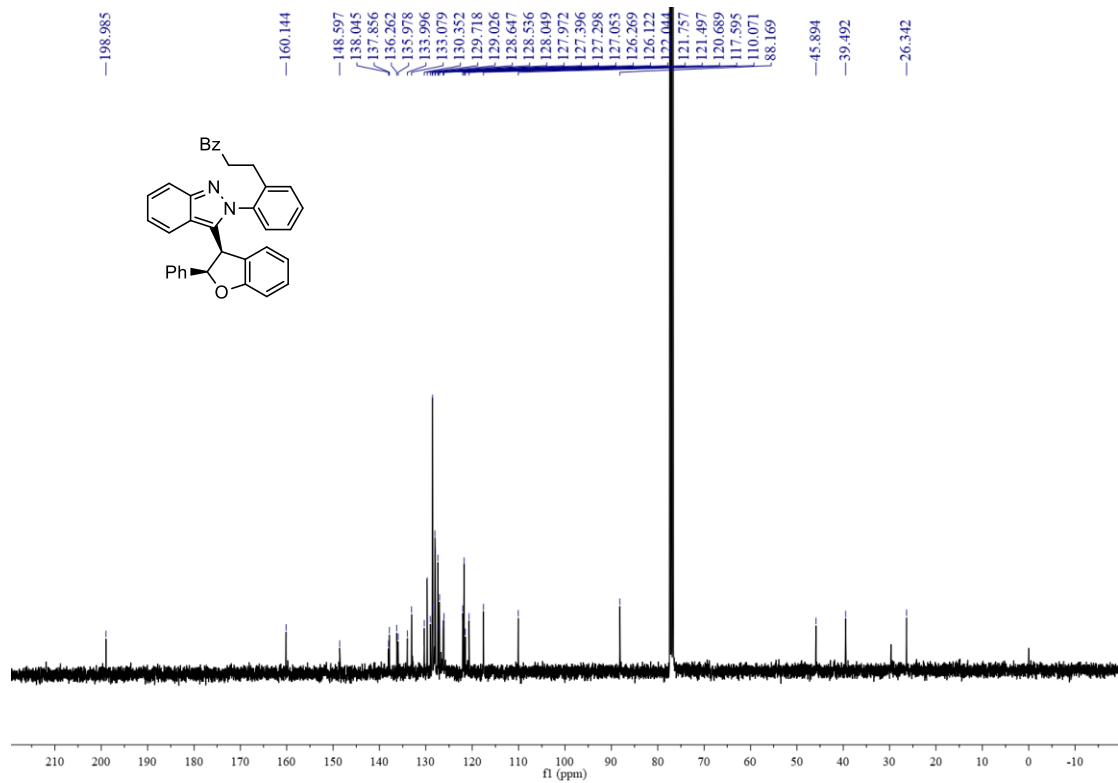

*N*-(2-(3-((2*R*,3*R*)-2-phenyl-2,3-dihydrobenzofuran-3-yl)-2*H*-indazol-2-yl)phenyl)benzamide (6e)

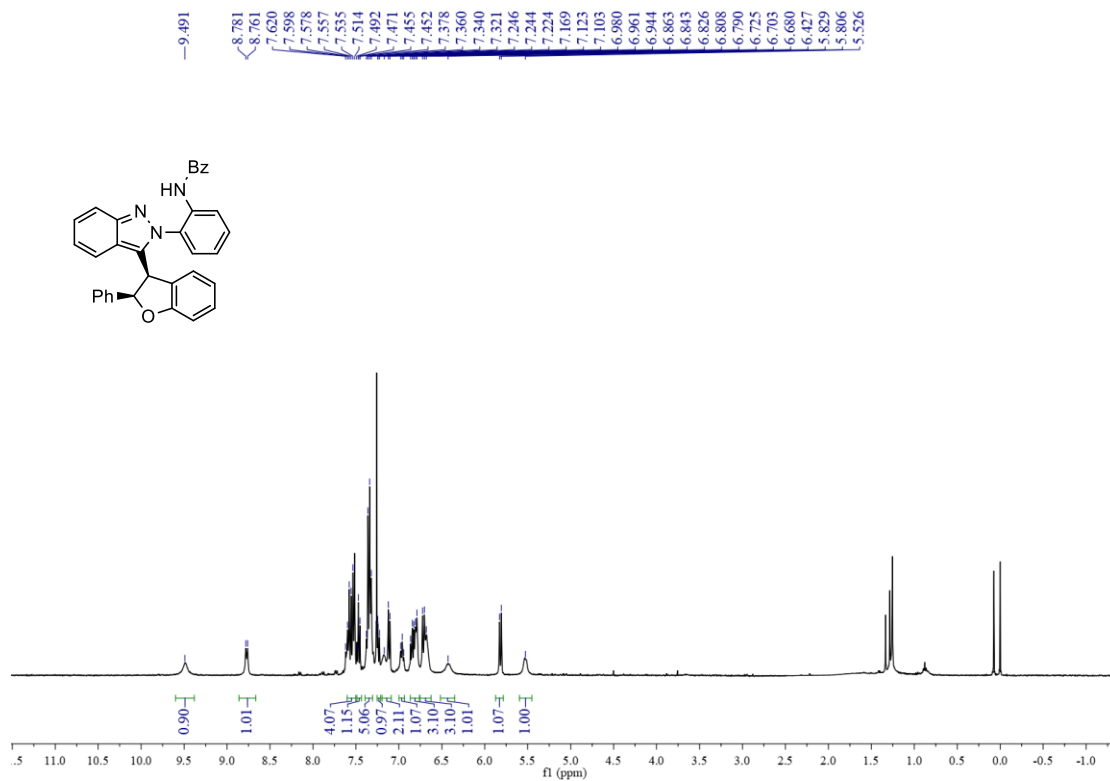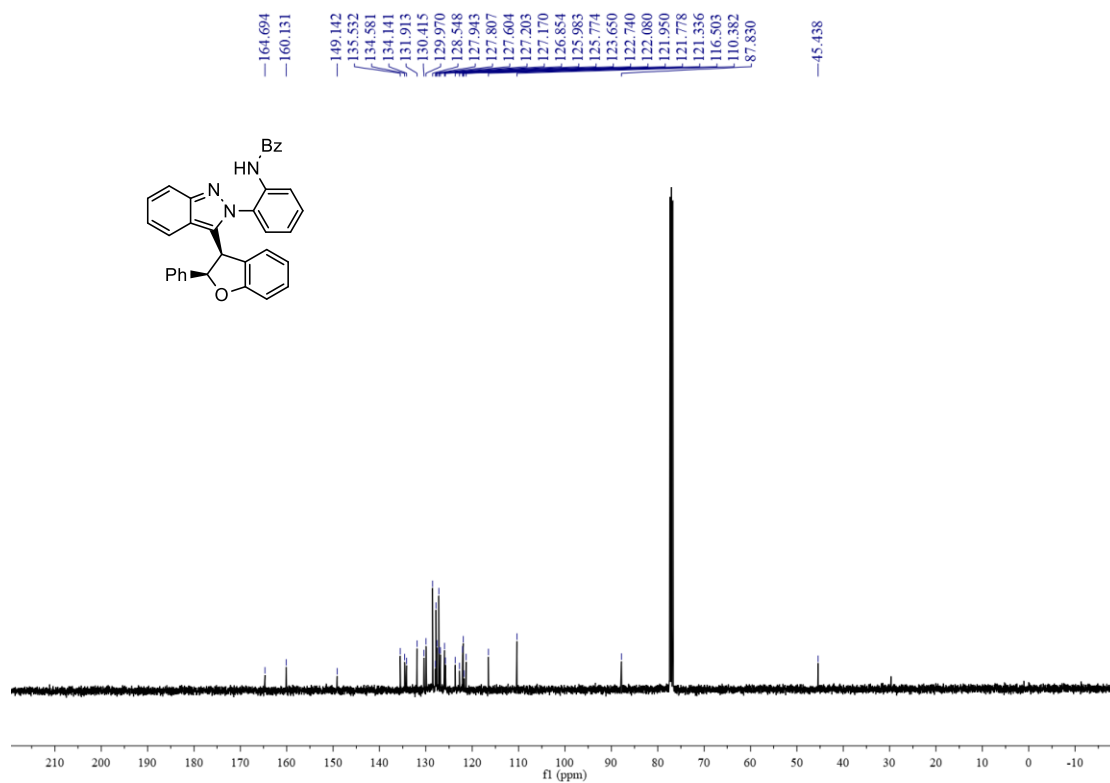



3-((2*R*,3*R*)-2-phenyl-2,3-dihydrobenzofuran-3-yl)-2-(2-(phenylselanyl)phenyl)-2*H*-indazole (6f)

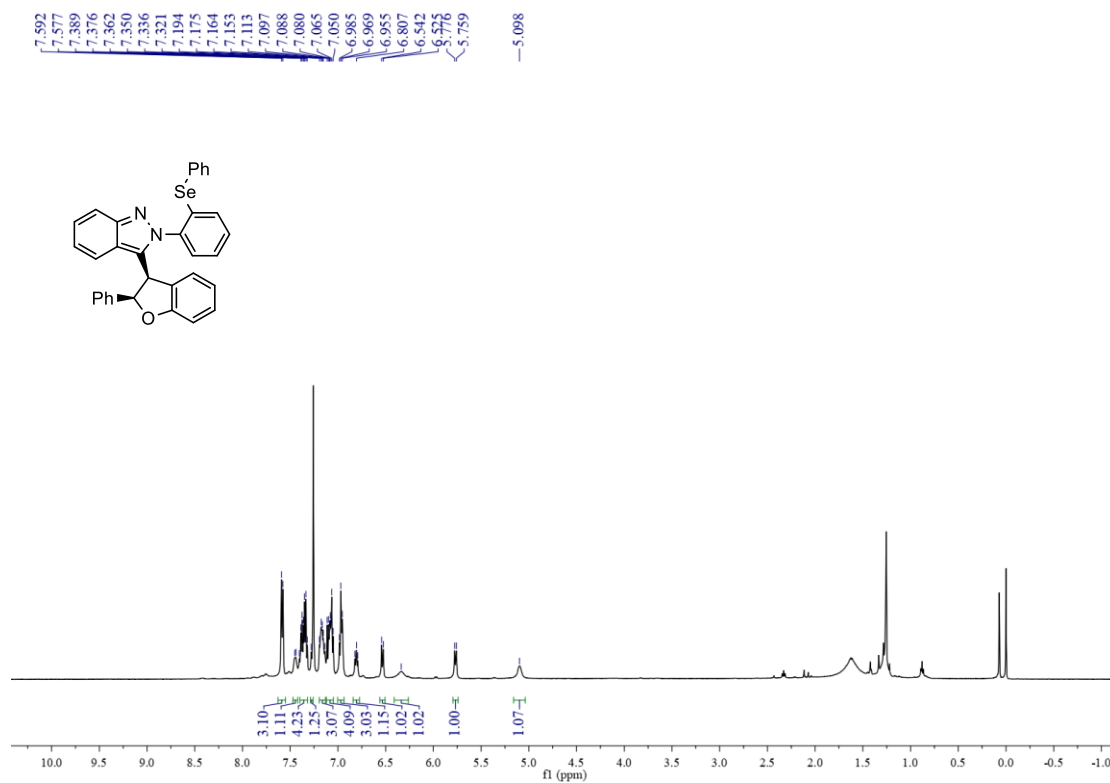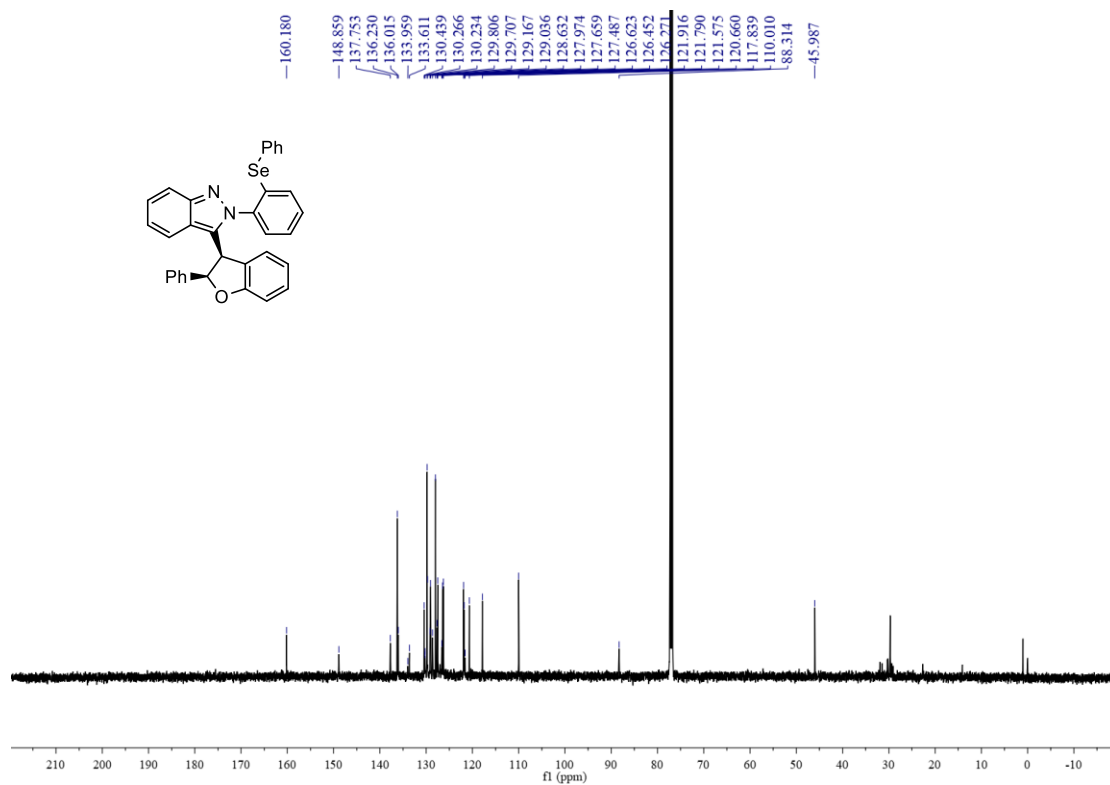

***N*-(5-bromo-2-(3-((1*R*,2*R*)-2-phenyl-1,2-dihydro-naphtho[2,1-*b*]furan-1-yl)-2*H*-indazol-2-yl)phenyl)-benzamide (6g)**

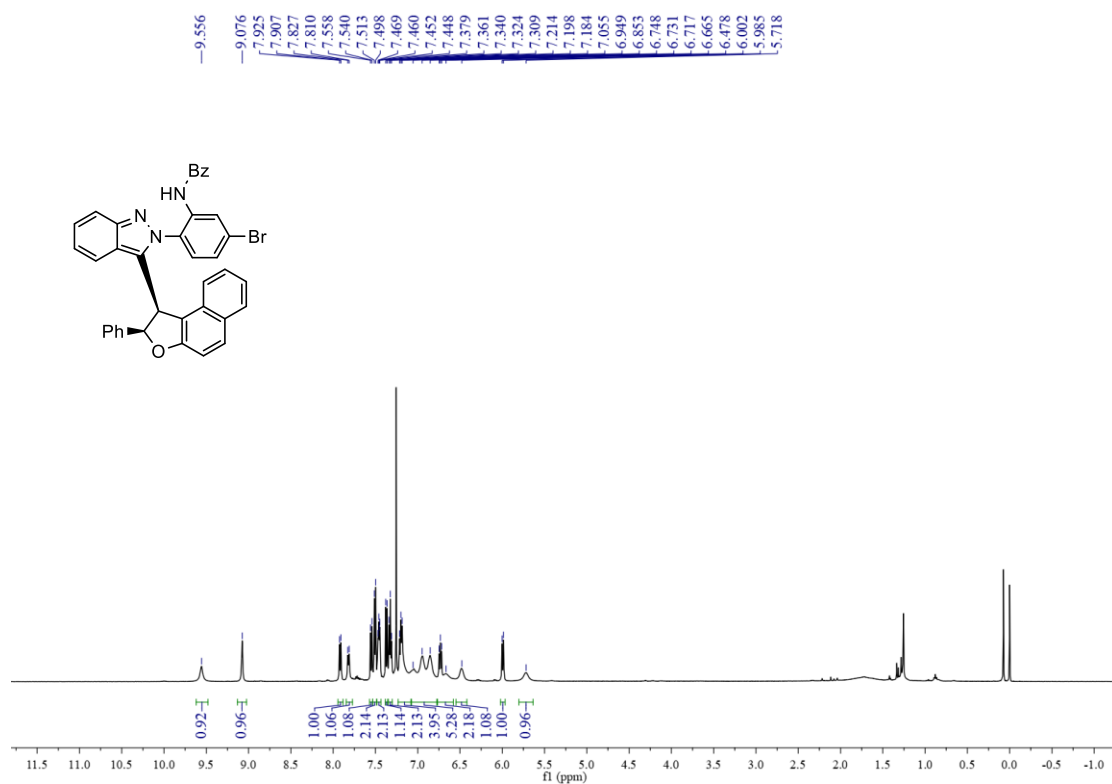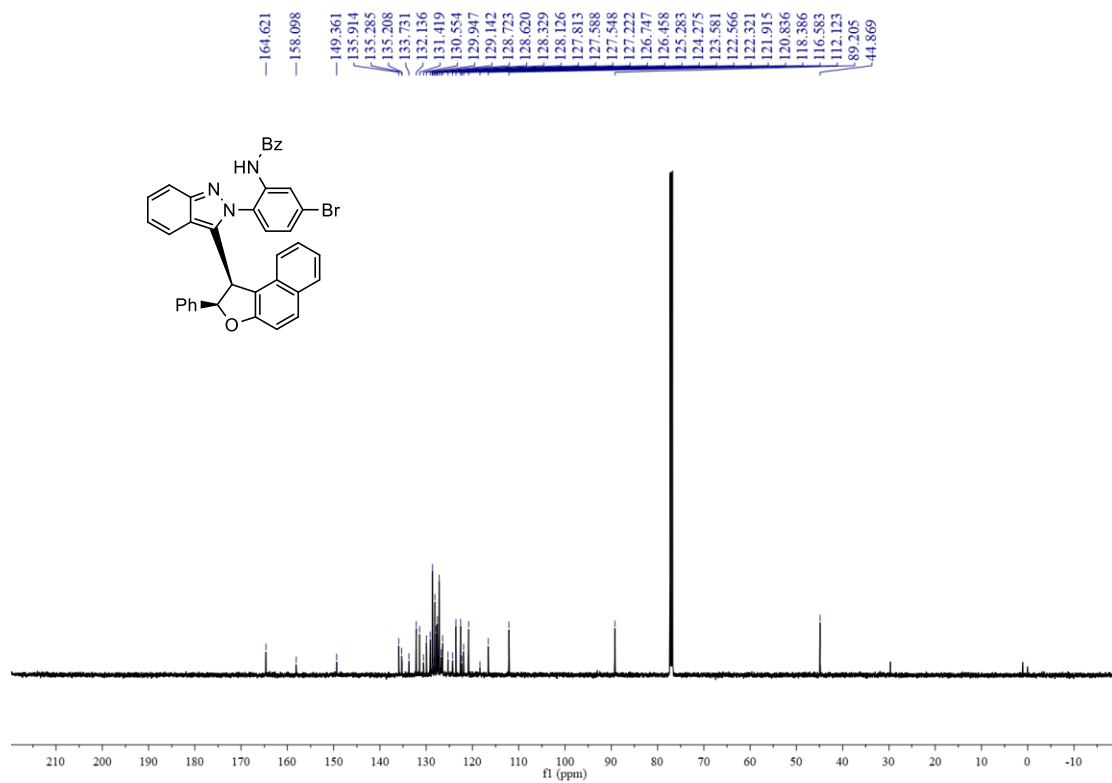

**3-(5-bromo-2-(3-(2-phenylnaphtho[2,1-b]furan-1-yl)-2H-indazol-2-yl)phenyl)-1-phenylpropan-1-one**  
**(6h)**

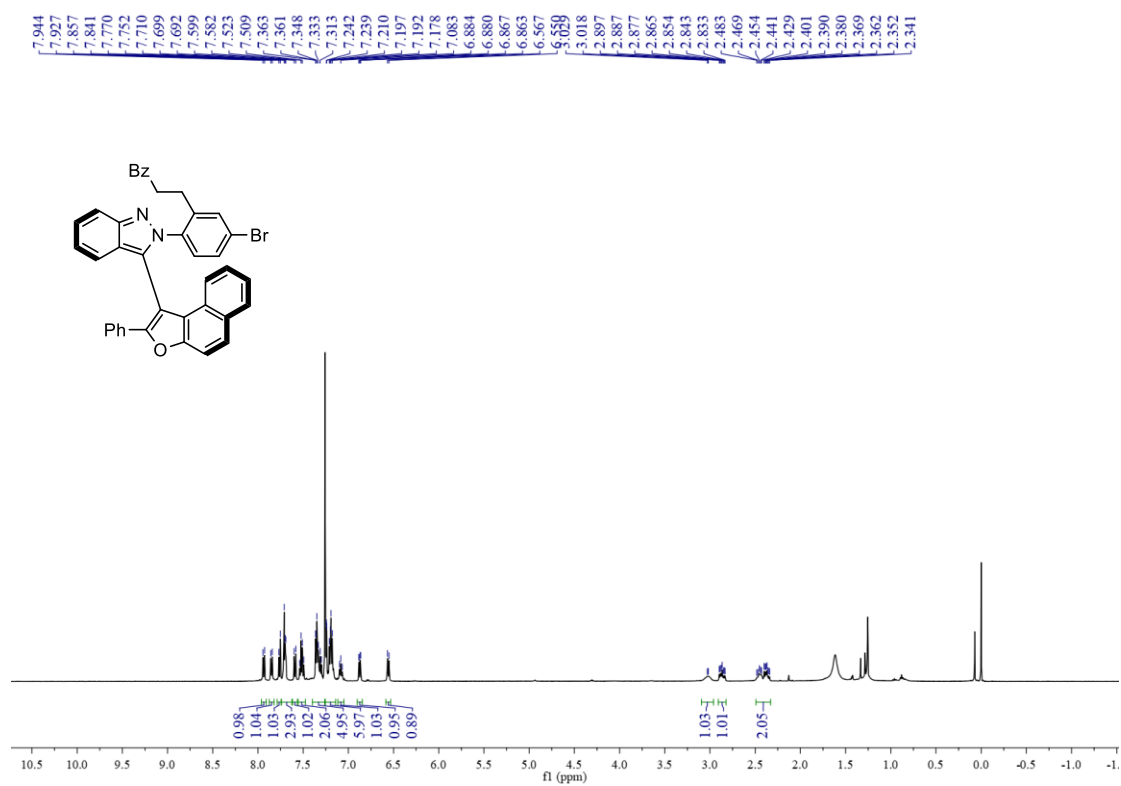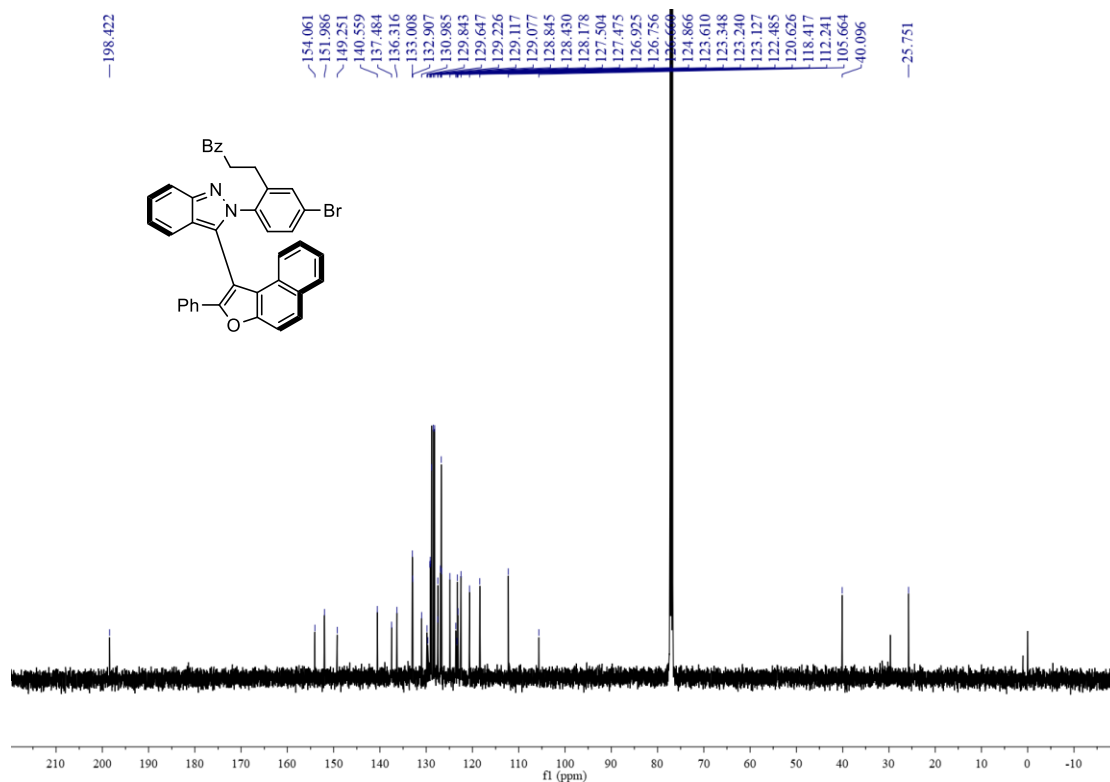

2-(2-allyl-4-bromophenyl)-3-(2-phenylnaphtho[2,1-b]furan-1-yl)-2H-indazole (6i)

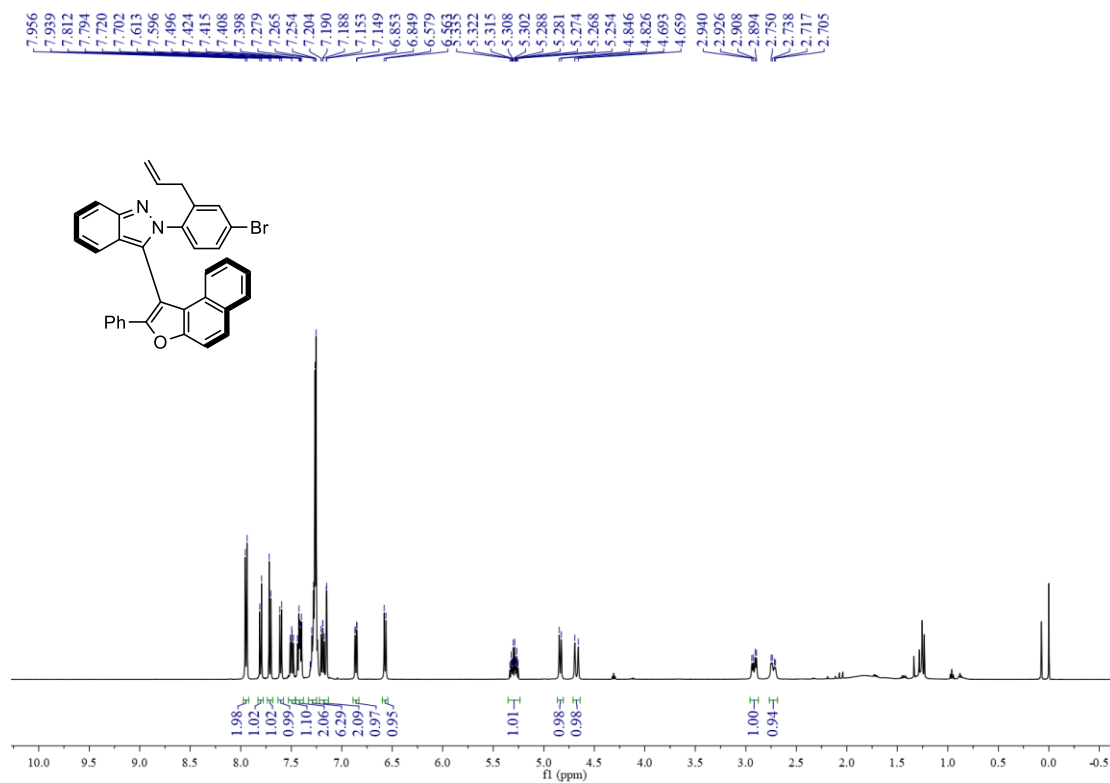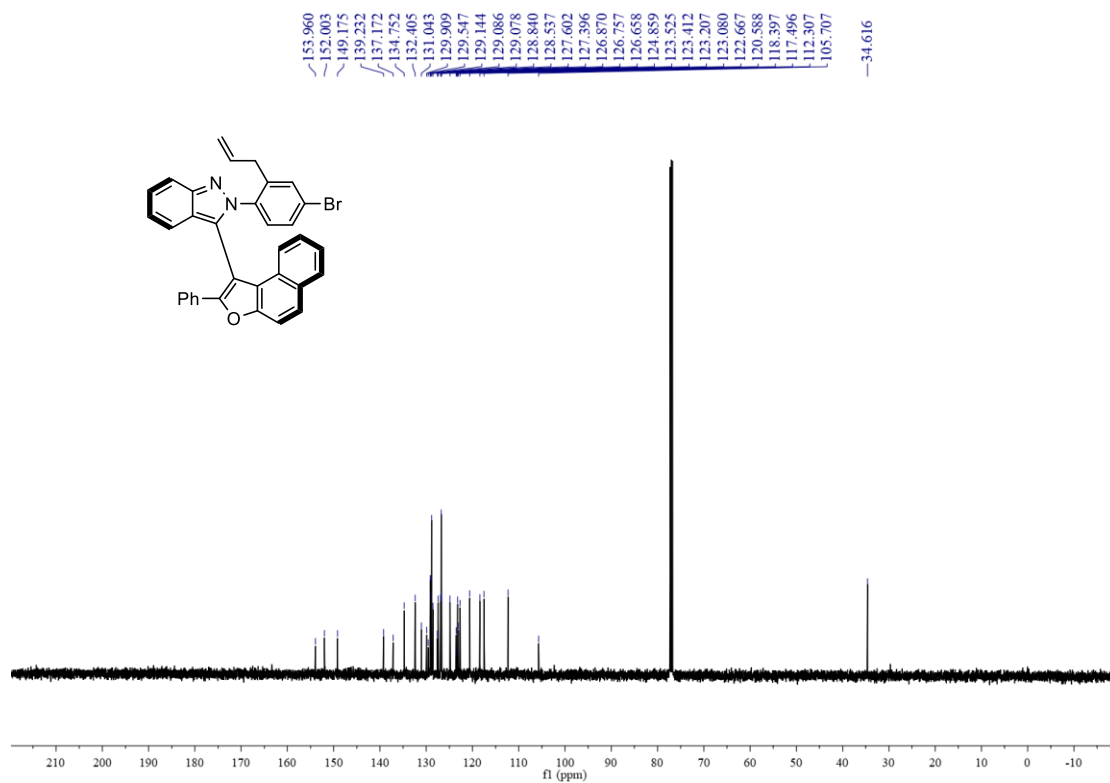

## 6. Data of HPLC

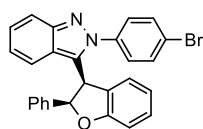

**3a**

<色谱图>

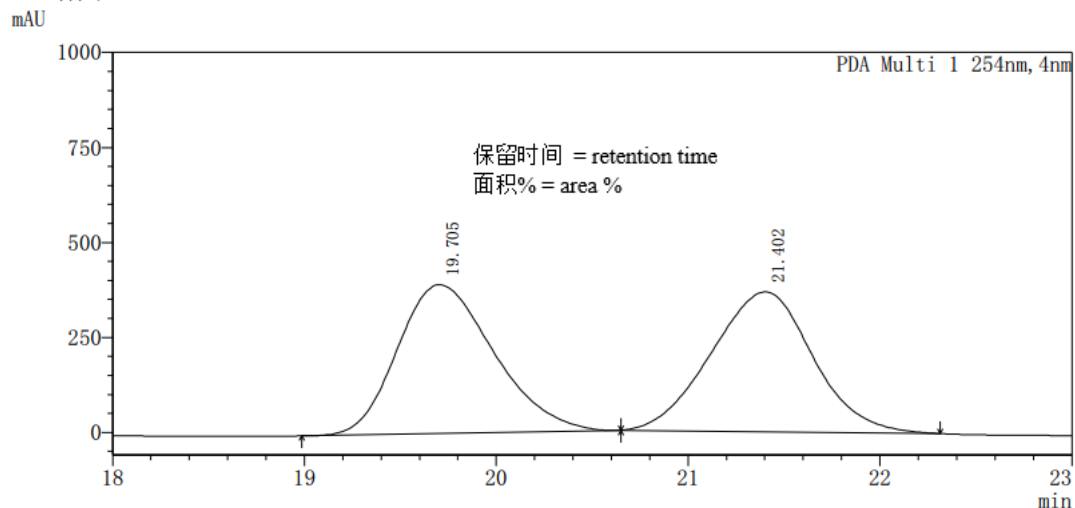

<峰表>

PDA Ch1 254nm

| 峰号 | 保留时间   | 面积       | 高度     | 化合物名 | 高度%     | 面积%     |
|----|--------|----------|--------|------|---------|---------|
| 1  | 19.705 | 13671576 | 391701 |      | 51.558  | 50.174  |
| 2  | 21.402 | 13576772 | 368033 |      | 48.442  | 49.826  |
| 总计 |        | 27248349 | 759734 |      | 100.000 | 100.000 |

<色谱图>

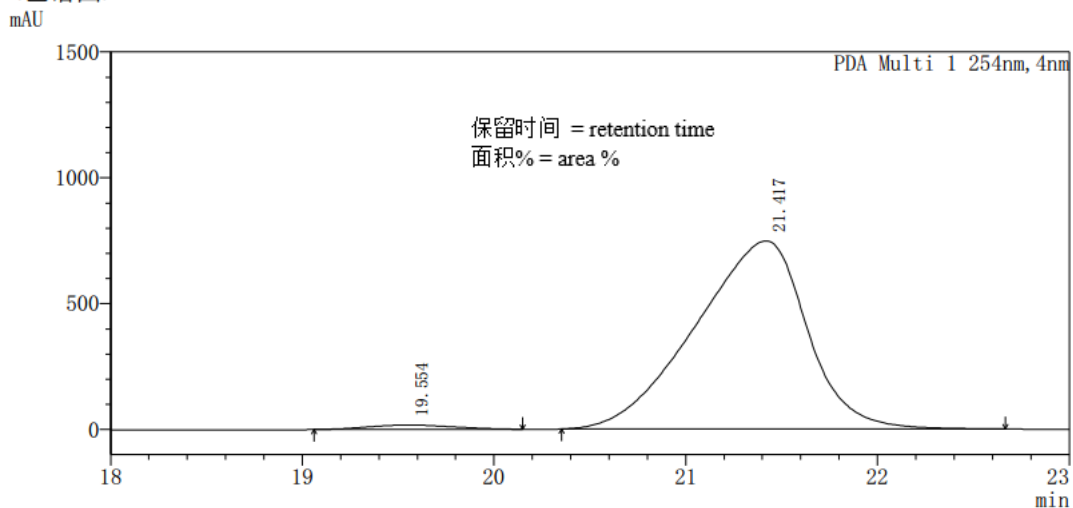

<峰表>

PDA Ch1 254nm

| 峰号 | 保留时间   | 面积       | 高度     | 化合物名 | 高度%     | 面积%     |
|----|--------|----------|--------|------|---------|---------|
| 1  | 19.554 | 545481   | 17332  |      | 2.266   | 1.766   |
| 2  | 21.417 | 30335364 | 747585 |      | 97.734  | 98.234  |
| 总计 |        | 30880845 | 764917 |      | 100.000 | 100.000 |

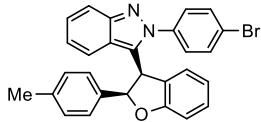

2b

<色谱图>

mAU

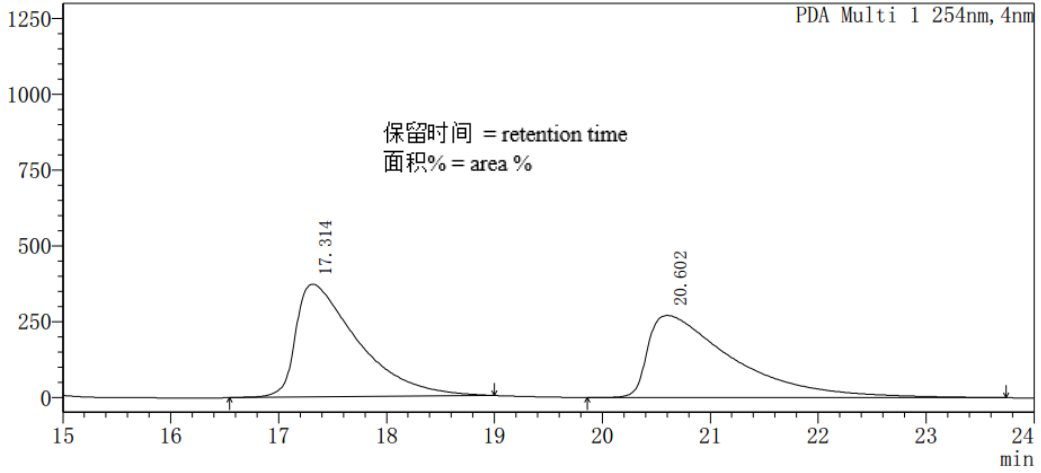

<峰表>

PDA Ch1 254nm

| 峰号 | 保留时间   | 面积       | 高度     | 化合物名 | 高度%     | 面积%     |
|----|--------|----------|--------|------|---------|---------|
| 1  | 17.314 | 14900818 | 372436 |      | 57.841  | 49.934  |
| 2  | 20.602 | 14939986 | 271458 |      | 42.159  | 50.066  |
| 总计 |        | 29840805 | 643894 |      | 100.000 | 100.000 |

<色谱图>

mAU

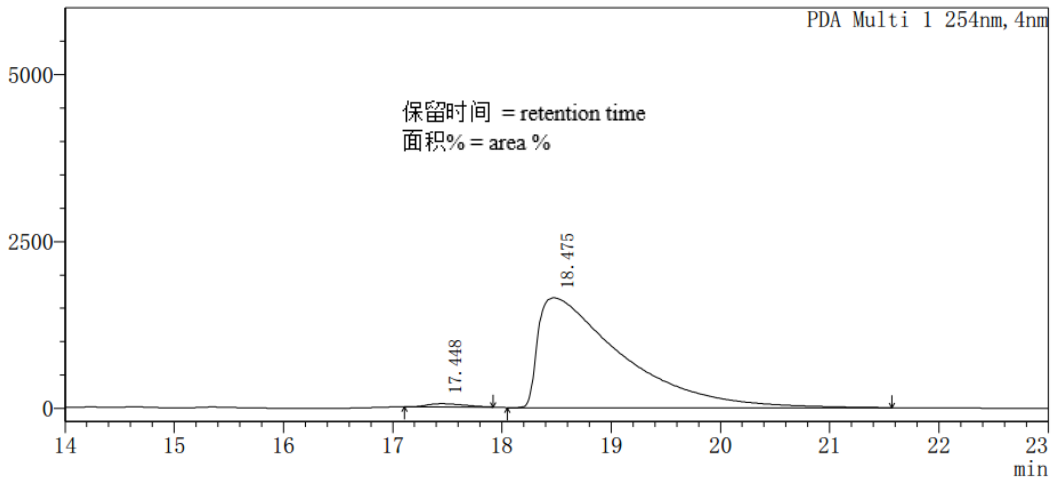

<峰表>

PDA Ch1 254nm

| 峰号 | 保留时间   | 面积       | 高度      | 化合物名 | 高度%     | 面积%     |
|----|--------|----------|---------|------|---------|---------|
| 1  | 17.448 | 1202346  | 50033   |      | 2.952   | 1.352   |
| 2  | 18.475 | 87729287 | 1644596 |      | 97.048  | 98.648  |
| 总计 |        | 88931633 | 1694629 |      | 100.000 | 100.000 |

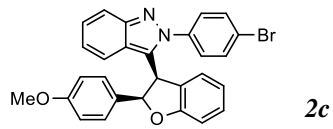

<色谱图>

mAU

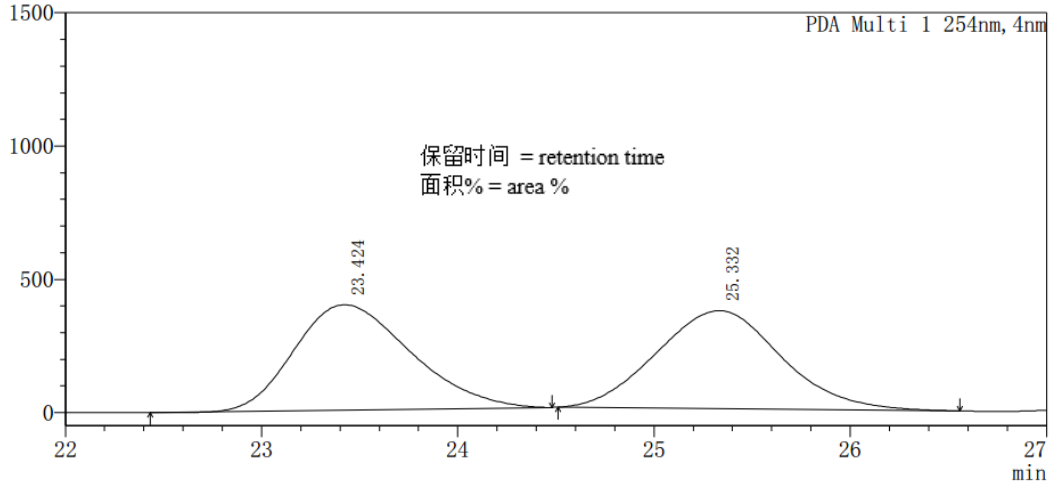

<峰表>

PDA Ch1 254nm

| 峰号 | 保留时间   | 面积       | 高度     | 化合物名 | 高度%     | 面积%     |
|----|--------|----------|--------|------|---------|---------|
| 1  | 23.424 | 16304655 | 395324 |      | 51.824  | 50.103  |
| 2  | 25.332 | 16237423 | 367503 |      | 48.176  | 49.897  |
| 总计 |        | 32542078 | 762827 |      | 100.000 | 100.000 |

<色谱图>

mAU

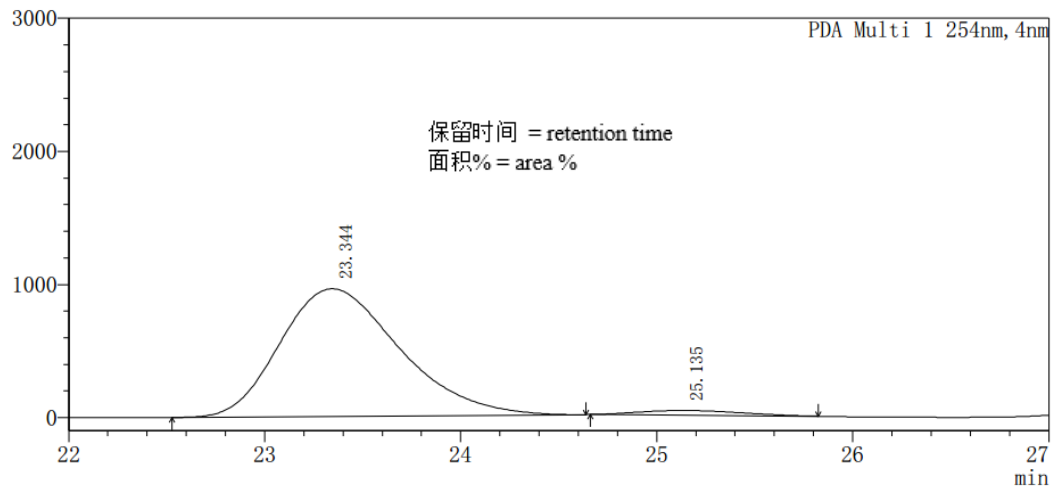

<峰表>

PDA Ch1 254nm

| 峰号 | 保留时间   | 面积       | 高度     | 化合物名 | 高度%     | 面积%     |
|----|--------|----------|--------|------|---------|---------|
| 1  | 23.344 | 40727343 | 958783 |      | 96.413  | 96.912  |
| 2  | 25.135 | 1297916  | 35673  |      | 3.587   | 3.088   |
| 总计 |        | 42025259 | 994457 |      | 100.000 | 100.000 |

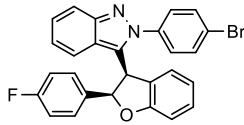

2d

<色谱图>

mAU

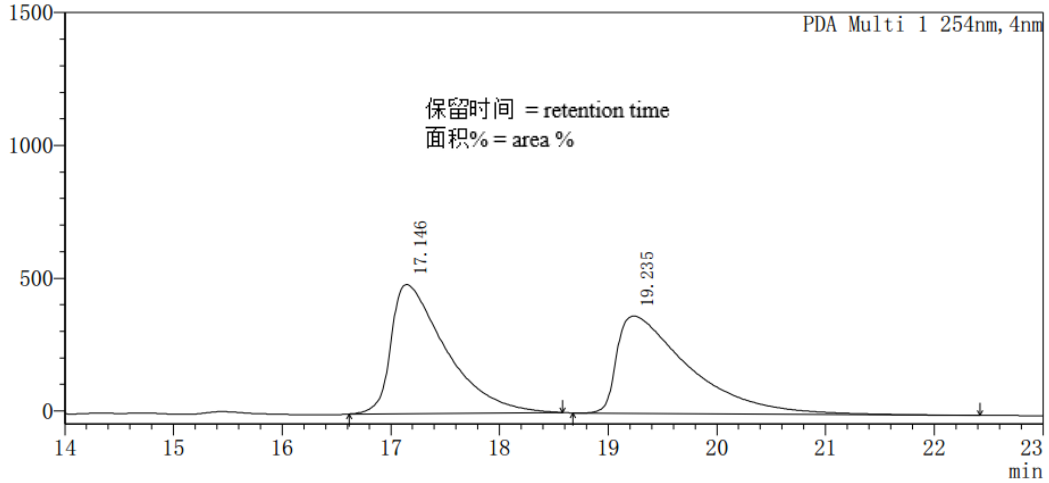

<峰表>

PDA Ch1 254nm

| 峰号 | 保留时间   | 面积       | 高度     | 化合物名 | 高度%     | 面积%     |
|----|--------|----------|--------|------|---------|---------|
| 1  | 17.146 | 17086781 | 486420 |      | 57.028  | 50.280  |
| 2  | 19.235 | 16896656 | 366534 |      | 42.972  | 49.720  |
| 总计 |        | 33983437 | 852955 |      | 100.000 | 100.000 |

<色谱图>

mAU

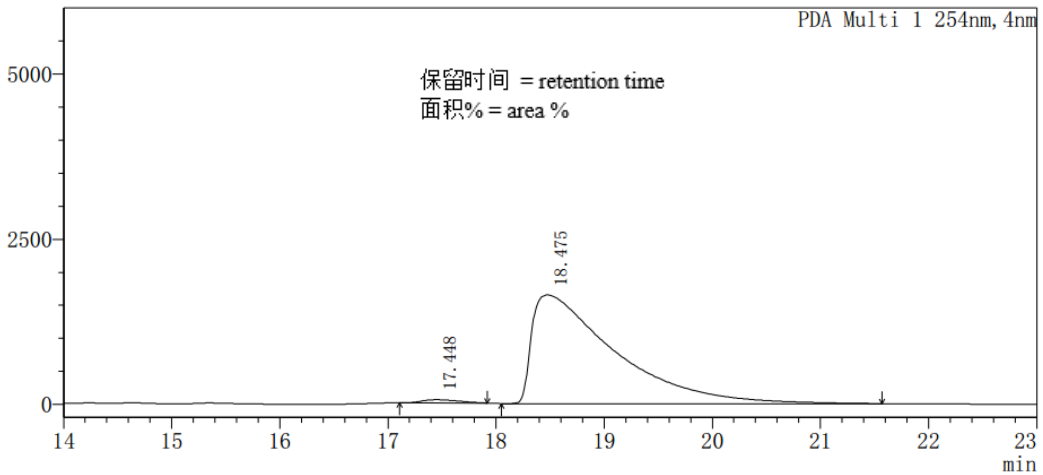

<峰表>

PDA Ch1 254nm

| 峰号 | 保留时间   | 面积       | 高度      | 化合物名 | 高度%     | 面积%     |
|----|--------|----------|---------|------|---------|---------|
| 1  | 17.448 | 1202346  | 50033   |      | 2.952   | 1.352   |
| 2  | 18.475 | 87729287 | 1644596 |      | 97.048  | 98.648  |
| 总计 |        | 88931633 | 1694629 |      | 100.000 | 100.000 |



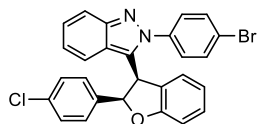

2e

<色谱图>

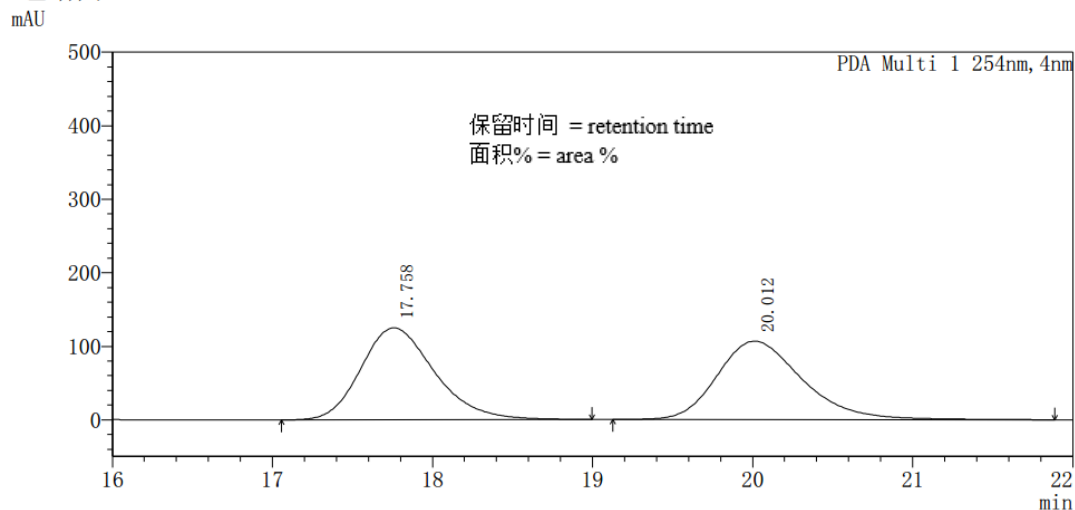

<峰表>

PDA Ch1 254nm

| 峰号 | 保留时间   | 面积      | 高度     | 化合物名 | 高度%     | 面积%     |
|----|--------|---------|--------|------|---------|---------|
| 1  | 17.758 | 4008657 | 125019 |      | 53.954  | 50.266  |
| 2  | 20.012 | 3966246 | 106695 |      | 46.046  | 49.734  |
| 总计 |        | 7974903 | 231714 |      | 100.000 | 100.000 |

<色谱图>

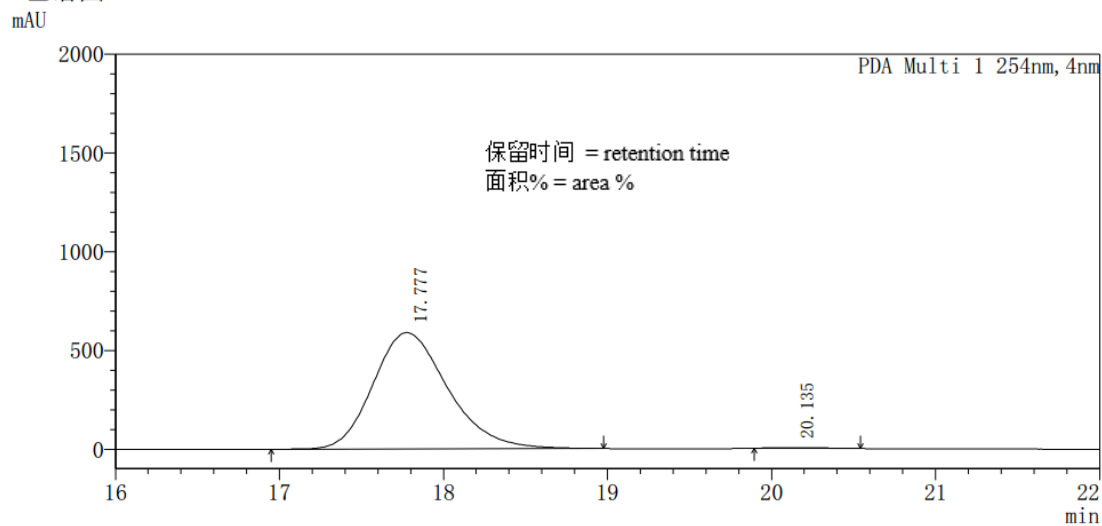

<峰表>

PDA Ch1 254nm

| 峰号 | 保留时间   | 面积       | 高度     | 化合物名 | 高度%     | 面积%     |
|----|--------|----------|--------|------|---------|---------|
| 1  | 17.777 | 18674030 | 589110 |      | 99.412  | 99.577  |
| 2  | 20.135 | 79299    | 3483   |      | 0.588   | 0.423   |
| 总计 |        | 18753328 | 592593 |      | 100.000 | 100.000 |

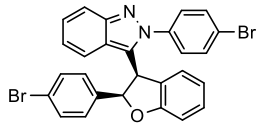

2f

<色谱图>

mAU

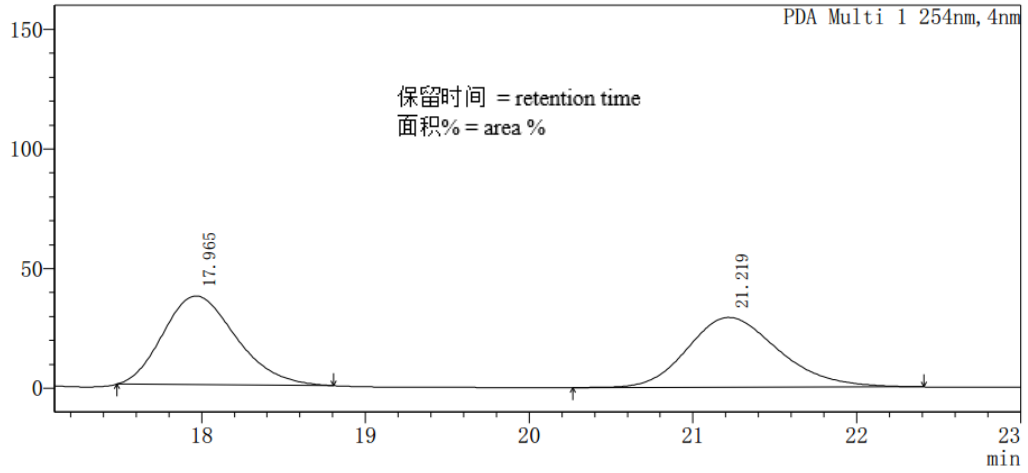

<峰表>

PDA Ch1 254nm

| 峰号 | 保留时间   | 面积      | 高度    | 化合物名 | 高度%     | 面积%     |
|----|--------|---------|-------|------|---------|---------|
| 1  | 17.965 | 1154843 | 37114 |      | 55.971  | 50.472  |
| 2  | 21.219 | 1133254 | 29195 |      | 44.029  | 49.528  |
| 总计 |        | 2288097 | 66308 |      | 100.000 | 100.000 |

<色谱图>

mAU

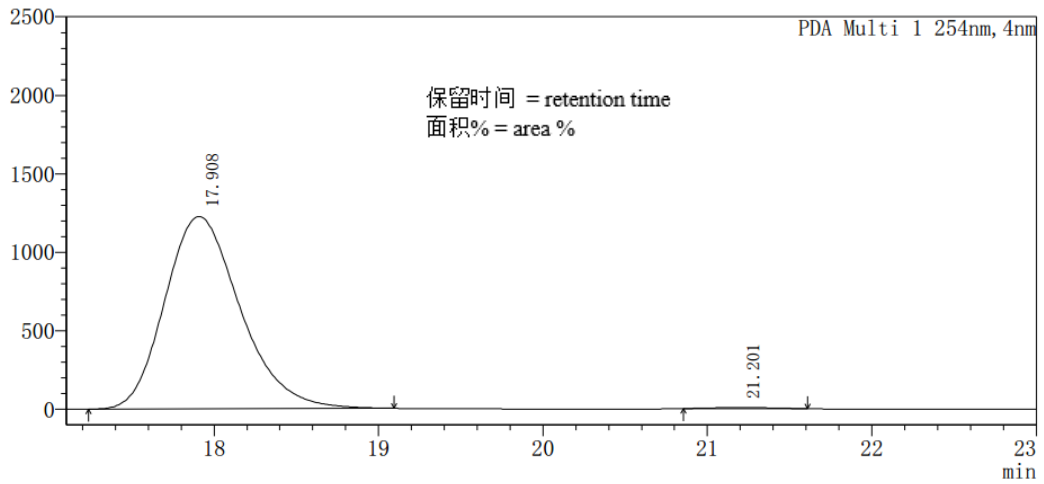

<峰表>

PDA Ch1 254nm

| 峰号 | 保留时间   | 面积       | 高度      | 化合物名 | 高度%     | 面积%     |
|----|--------|----------|---------|------|---------|---------|
| 1  | 17.908 | 39141053 | 1225879 |      | 99.441  | 99.535  |
| 2  | 21.201 | 183039   | 6889    |      | 0.559   | 0.465   |
| 总计 |        | 39324092 | 1232768 |      | 100.000 | 100.000 |

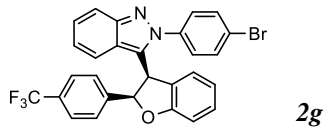

<色谱图>

mAU

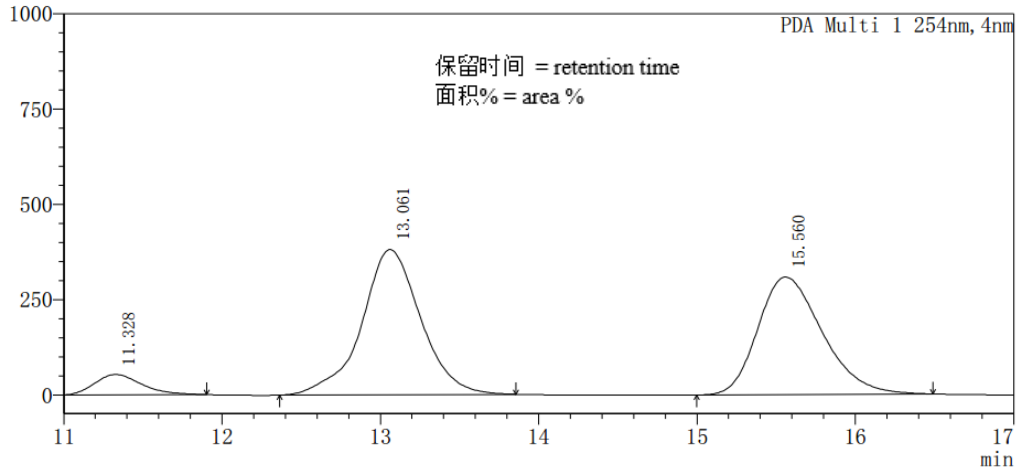

<峰表>

PDA Ch1 254nm

| 峰号 | 保留时间   | 面积       | 高度     | 化合物名 | 高度%     | 面积%     |
|----|--------|----------|--------|------|---------|---------|
| 1  | 11.328 | 1120018  | 53665  |      | 7.219   | 5.666   |
| 2  | 13.061 | 9899713  | 380881 |      | 51.236  | 50.079  |
| 3  | 15.560 | 8748559  | 308845 |      | 41.545  | 44.256  |
| 总计 |        | 19768290 | 743391 |      | 100.000 | 100.000 |

<色谱图>

mAU

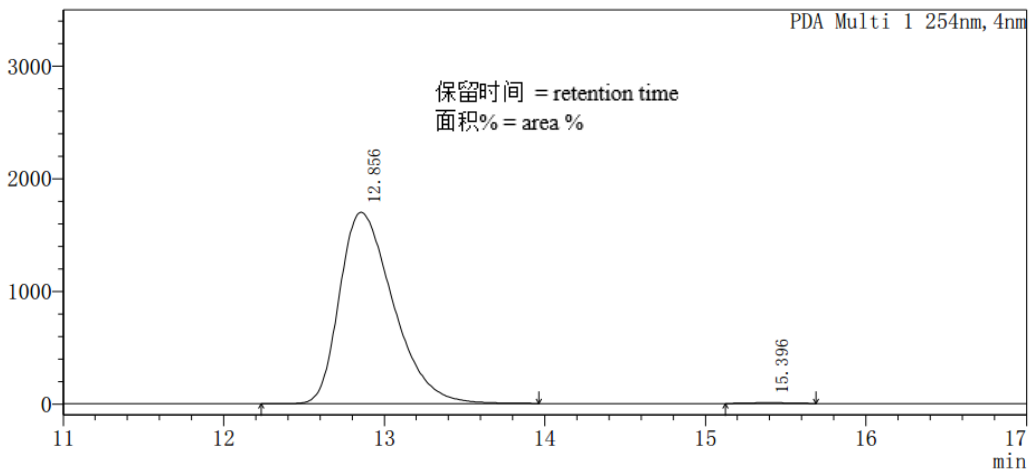

<峰表>

PDA Ch1 254nm

| 峰号 | 保留时间   | 面积       | 高度      | 化合物名 | 高度%     | 面积%     |
|----|--------|----------|---------|------|---------|---------|
| 1  | 12.856 | 39583445 | 1700815 |      | 99.580  | 99.650  |
| 2  | 15.396 | 139208   | 7170    |      | 0.420   | 0.350   |
| 总计 |        | 39722653 | 1707985 |      | 100.000 | 100.000 |

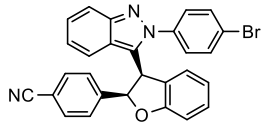

2h

<色谱图>

mAU

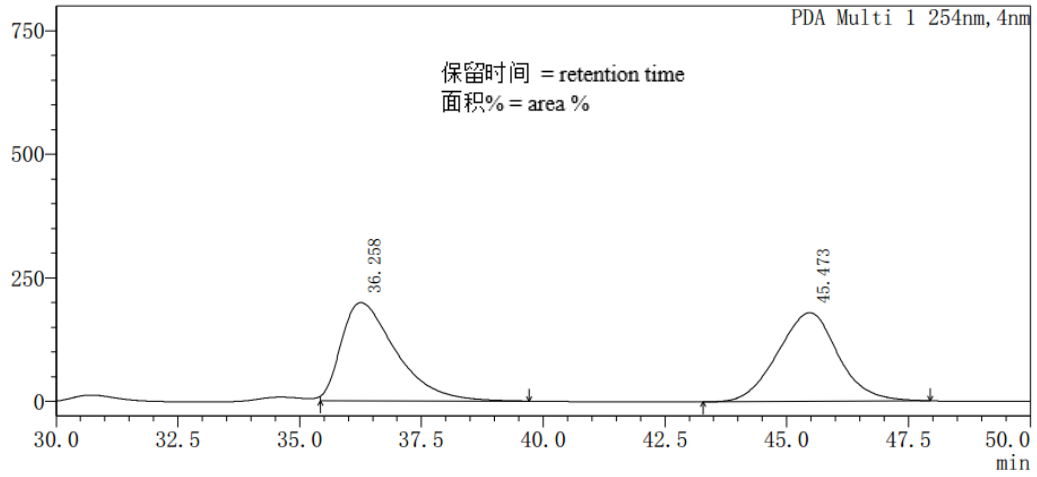

<峰表>

PDA Ch1 254nm

| 峰号 | 保留时间   | 面积       | 高度     | 化合物名 | 高度%     | 面积%     |
|----|--------|----------|--------|------|---------|---------|
| 1  | 36.258 | 15534211 | 198804 |      | 52.537  | 50.012  |
| 2  | 45.473 | 15526873 | 179606 |      | 47.463  | 49.988  |
| 总计 |        | 31061084 | 378410 |      | 100.000 | 100.000 |

<色谱图>

mAU

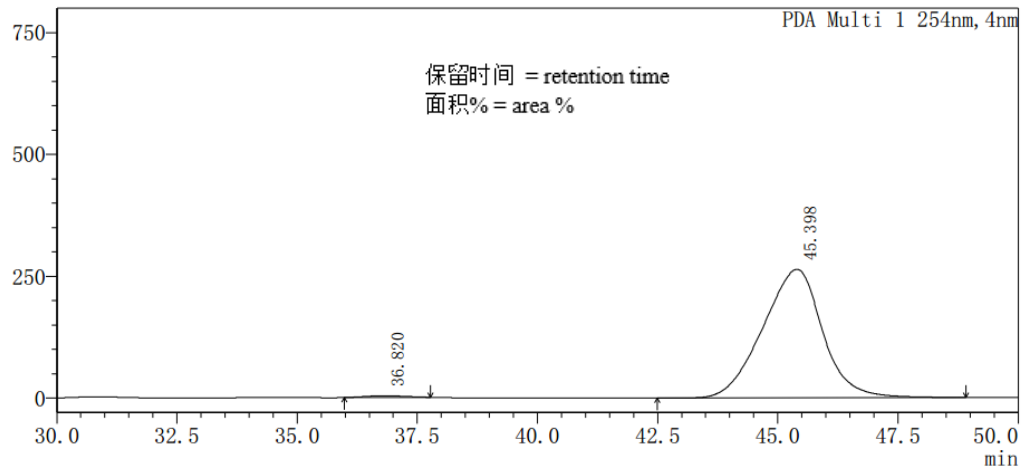

<峰表>

PDA Ch1 254nm

| 峰号 | 保留时间   | 面积       | 高度     | 化合物名 | 高度%     | 面积%     |
|----|--------|----------|--------|------|---------|---------|
| 1  | 36.820 | 208910   | 3539   |      | 1.324   | 0.903   |
| 2  | 45.398 | 22917001 | 263835 |      | 98.676  | 99.097  |
| 总计 |        | 23125911 | 267374 |      | 100.000 | 100.000 |

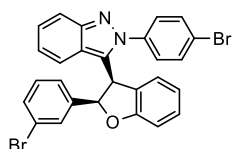

<色谱图>

mAU

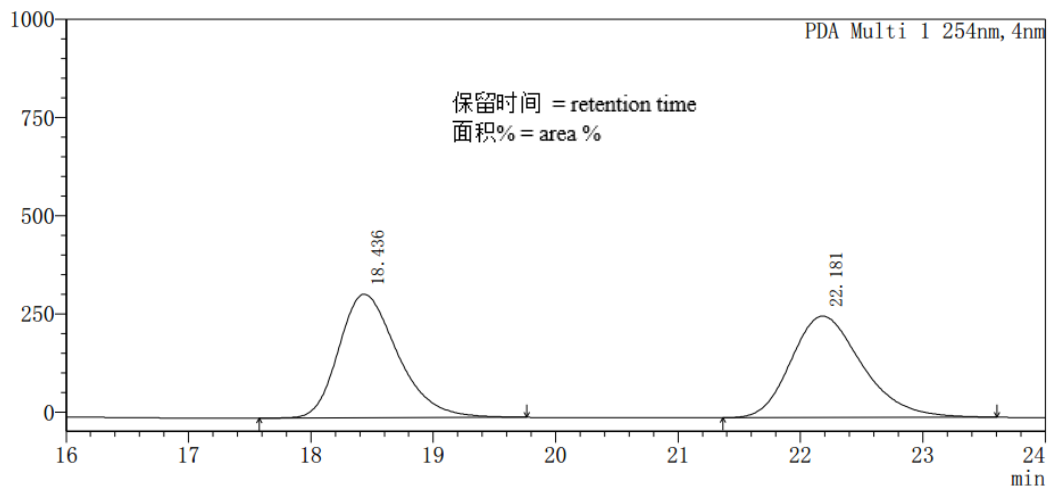

<峰表>

PDA Ch1 254nm

| 峰号 | 保留时间   | 面积       | 高度     | 化合物名 | 高度%     | 面积%     |
|----|--------|----------|--------|------|---------|---------|
| 1  | 18.436 | 10522000 | 314745 |      | 54.913  | 50.171  |
| 2  | 22.181 | 10450293 | 258425 |      | 45.087  | 49.829  |
| 总计 |        | 20972293 | 573171 |      | 100.000 | 100.000 |

<色谱图>

mAU

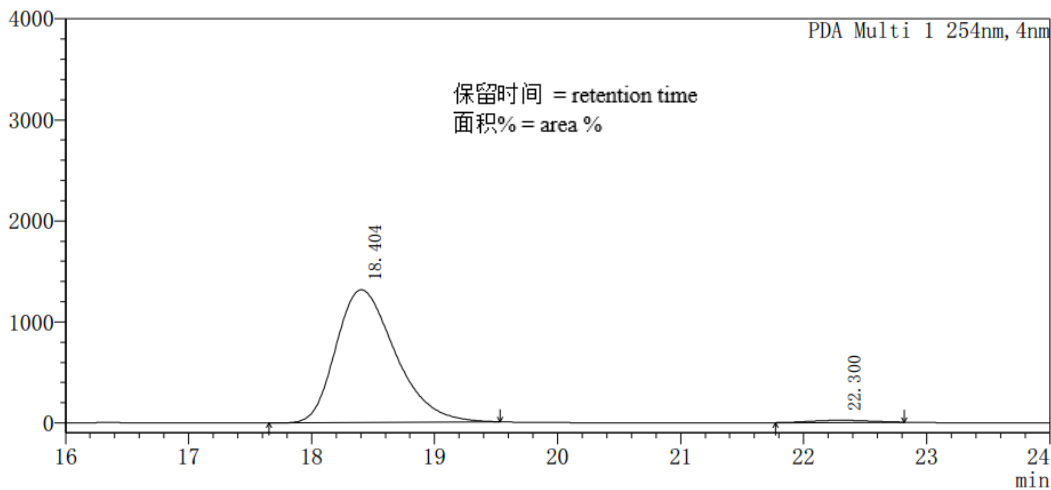

<峰表>

PDA Ch1 254nm

| 峰号 | 保留时间   | 面积       | 高度      | 化合物名 | 高度%     | 面积%     |
|----|--------|----------|---------|------|---------|---------|
| 1  | 18.404 | 44075472 | 1314811 |      | 98.381  | 98.405  |
| 2  | 22.300 | 714552   | 21639   |      | 1.619   | 1.595   |
| 总计 |        | 44790025 | 1336450 |      | 100.000 | 100.000 |

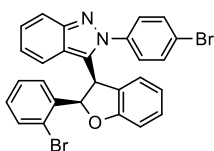

2j

<色谱图>

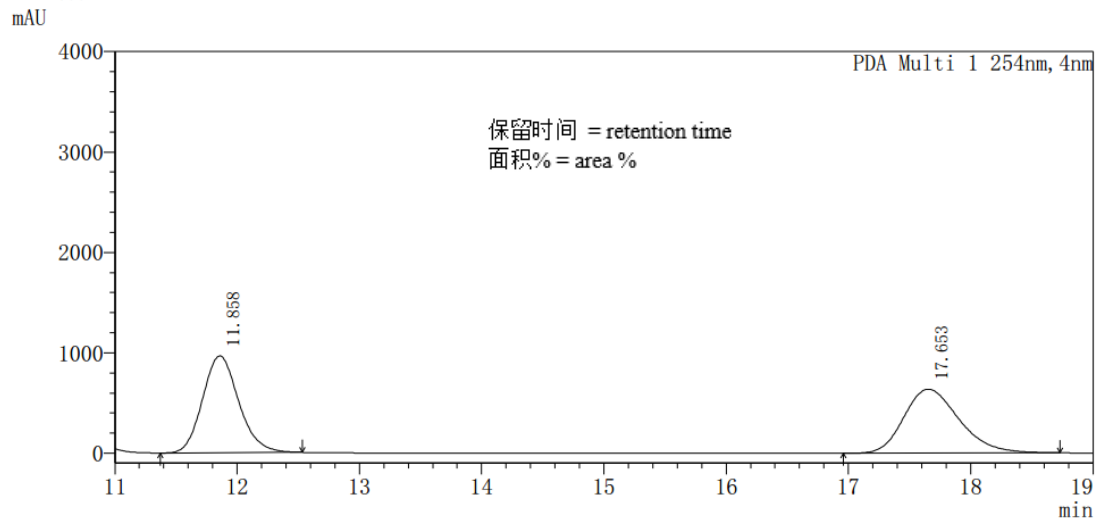

<峰表>

PDA Ch1 254nm

| 峰号 | 保留时间   | 面积       | 高度      | 化合物名 | 高度%     | 面积%     |
|----|--------|----------|---------|------|---------|---------|
| 1  | 11.858 | 19861953 | 965589  |      | 60.254  | 49.829  |
| 2  | 17.653 | 19998658 | 636944  |      | 39.746  | 50.171  |
| 总计 |        | 39860611 | 1602533 |      | 100.000 | 100.000 |

<色谱图>

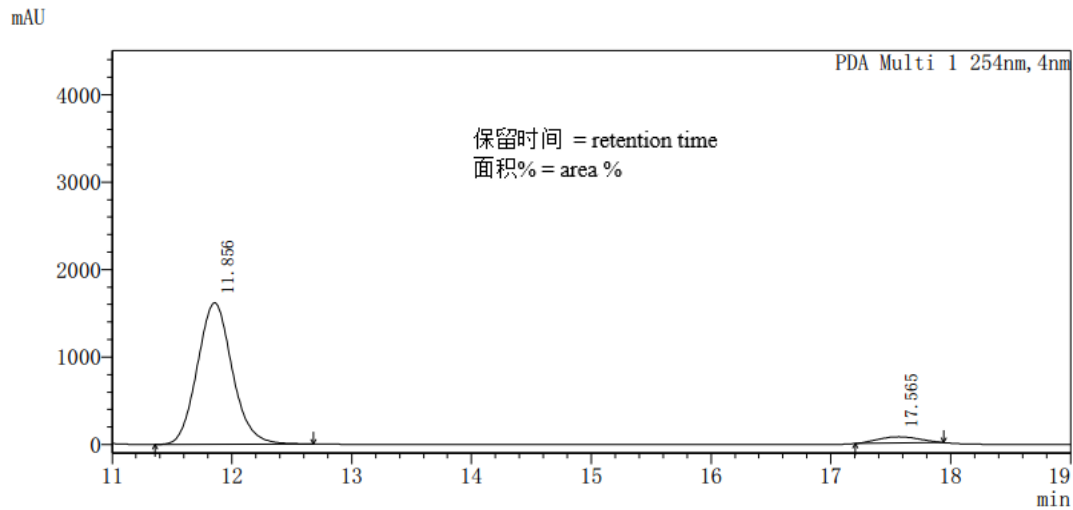

<峰表>

PDA Ch1 254nm

| 峰号 | 保留时间   | 面积       | 高度      | 化合物名 | 高度%     | 面积%     |
|----|--------|----------|---------|------|---------|---------|
| 1  | 11.856 | 32799699 | 1616080 |      | 95.759  | 95.001  |
| 2  | 17.565 | 1725819  | 71579   |      | 4.241   | 4.999   |
| 总计 |        | 34525518 | 1687658 |      | 100.000 | 100.000 |

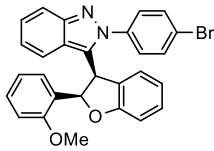

**2k**

<色谱图>

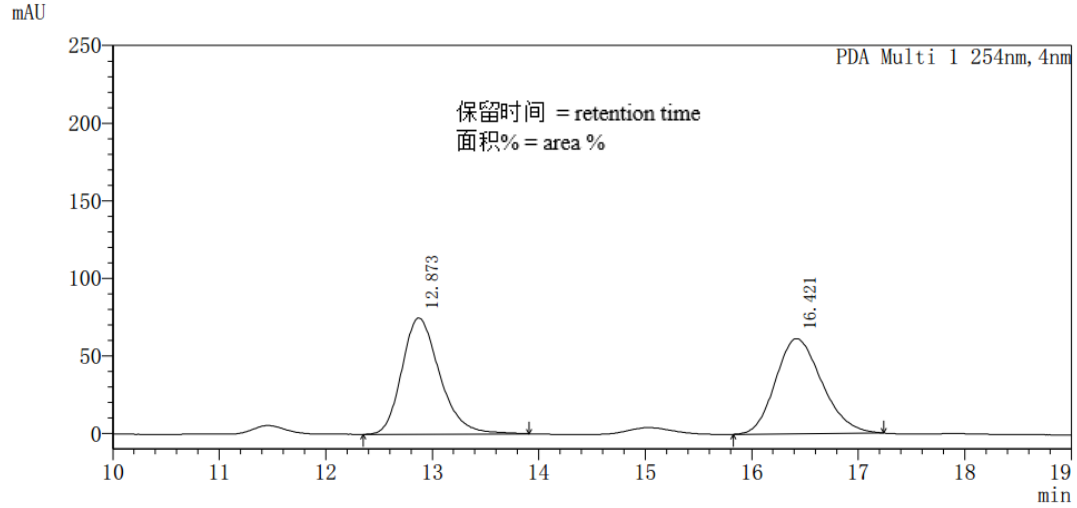

<峰表>

PDA Ch1 254nm

| 峰号 | 保留时间   | 面积      | 高度     | 化合物名 | 高度%     | 面积%     |
|----|--------|---------|--------|------|---------|---------|
| 1  | 12.873 | 1849927 | 74825  |      | 54.997  | 49.907  |
| 2  | 16.421 | 1856826 | 61227  |      | 45.003  | 50.093  |
| 总计 |        | 3706753 | 136052 |      | 100.000 | 100.000 |

<色谱图>

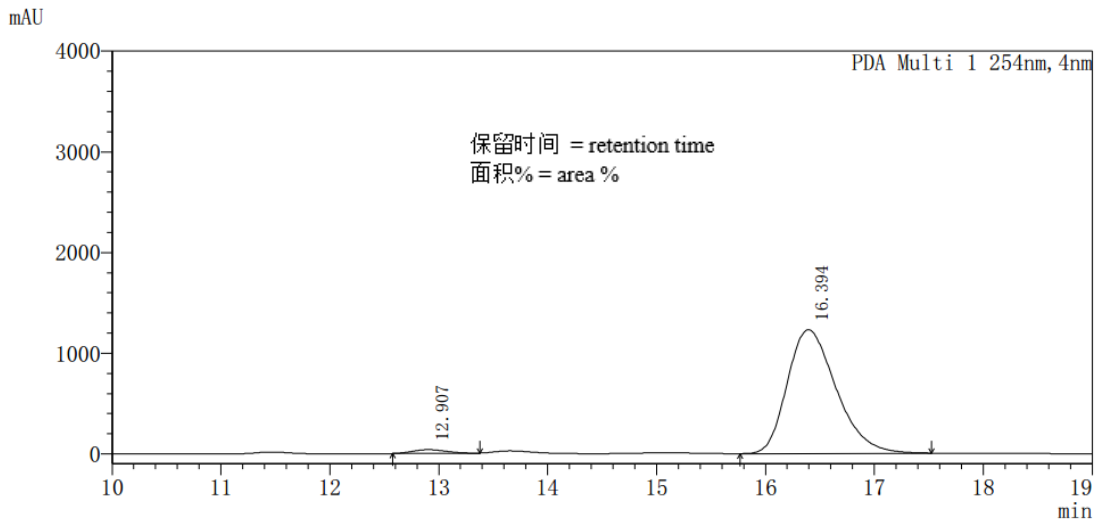

<峰表>

PDA Ch1 254nm

| 峰号 | 保留时间   | 面积       | 高度      | 化合物名 | 高度%     | 面积%     |
|----|--------|----------|---------|------|---------|---------|
| 1  | 12.907 | 775285   | 36854   |      | 2.910   | 1.980   |
| 2  | 16.394 | 38381008 | 1229444 |      | 97.090  | 98.020  |
| 总计 |        | 39156293 | 1266299 |      | 100.000 | 100.000 |

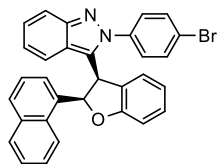

21

<色谱图>

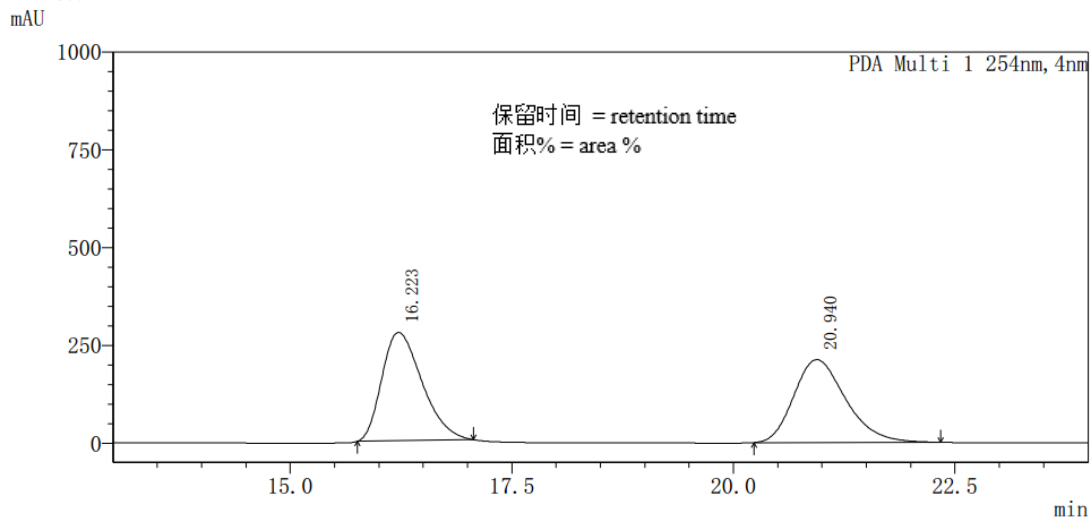

<峰表>

PDA Ch1 254nm

| 峰号 | 保留时间   | 面积       | 高度     | 化合物名 | 高度%     | 面积%     |
|----|--------|----------|--------|------|---------|---------|
| 1  | 16.223 | 8778339  | 277519 |      | 56.693  | 50.420  |
| 2  | 20.940 | 8632244  | 211992 |      | 43.307  | 49.580  |
| 总计 |        | 17410583 | 489511 |      | 100.000 | 100.000 |

<色谱图>

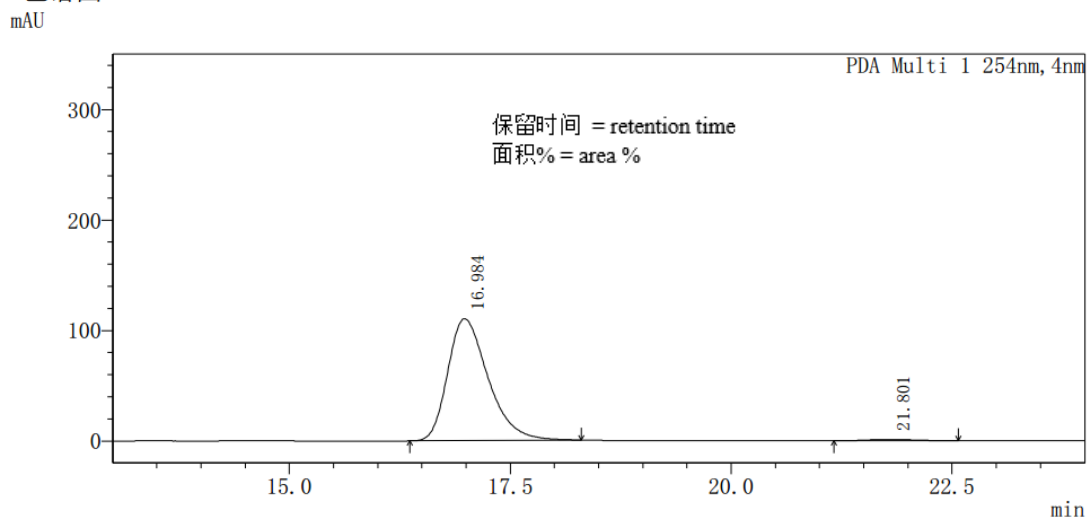

<峰表>

PDA Ch1 254nm

| 峰号 | 保留时间   | 面积      | 高度     | 化合物名 | 高度%     | 面积%     |
|----|--------|---------|--------|------|---------|---------|
| 1  | 16.984 | 3518033 | 110341 |      | 98.817  | 98.586  |
| 2  | 21.801 | 50454   | 1321   |      | 1.183   | 1.414   |
| 总计 |        | 3568486 | 111662 |      | 100.000 | 100.000 |



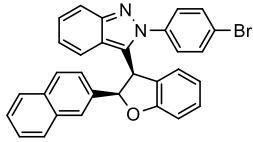

2m

<色谱图>

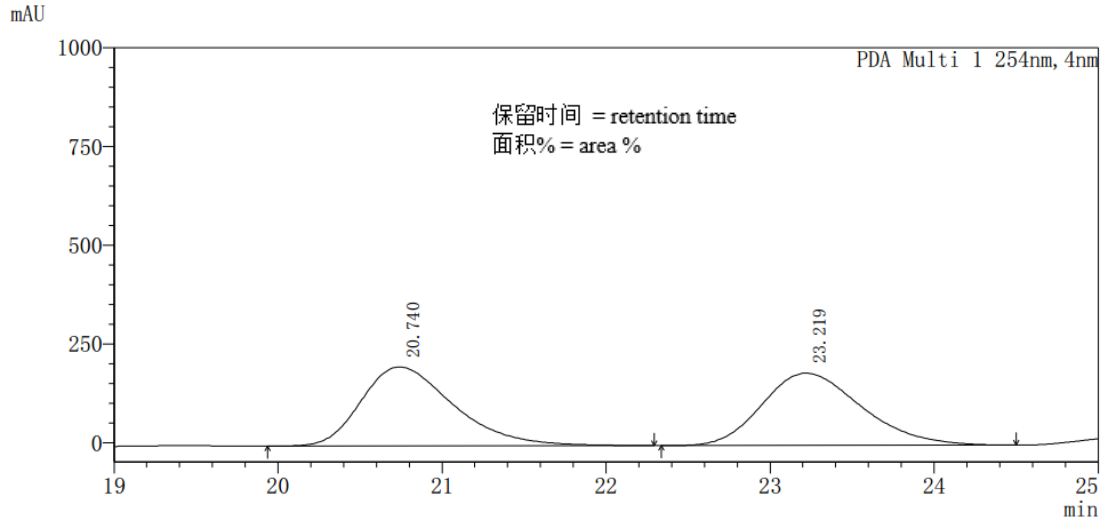

<峰表>

PDA Ch1 254nm

| 峰号 | 保留时间   | 面积       | 高度     | 化合物名 | 高度%     | 面积%     |
|----|--------|----------|--------|------|---------|---------|
| 1  | 20.740 | 7872435  | 200267 |      | 52.216  | 50.329  |
| 2  | 23.219 | 7769449  | 183271 |      | 47.784  | 49.671  |
| 总计 |        | 15641884 | 383538 |      | 100.000 | 100.000 |

<色谱图>

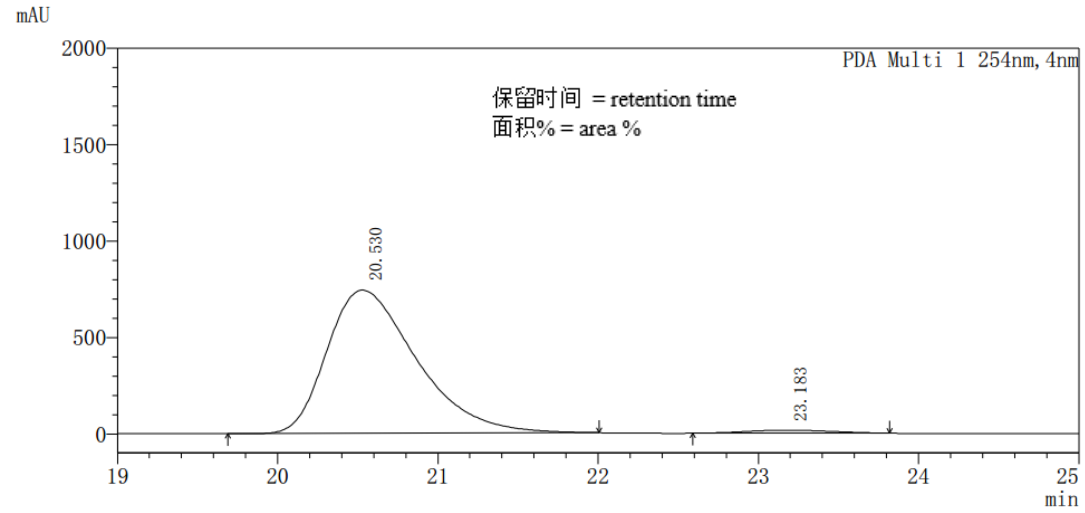

<峰表>

PDA Ch1 254nm

| 峰号 | 保留时间   | 面积       | 高度     | 化合物名 | 高度%     | 面积%     |
|----|--------|----------|--------|------|---------|---------|
| 1  | 20.530 | 28939489 | 743544 |      | 97.890  | 98.000  |
| 2  | 23.183 | 590502   | 16026  |      | 2.110   | 2.000   |
| 总计 |        | 29529992 | 759570 |      | 100.000 | 100.000 |

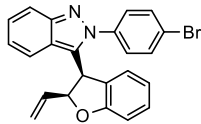

**2n**

<色谱图>

mAU

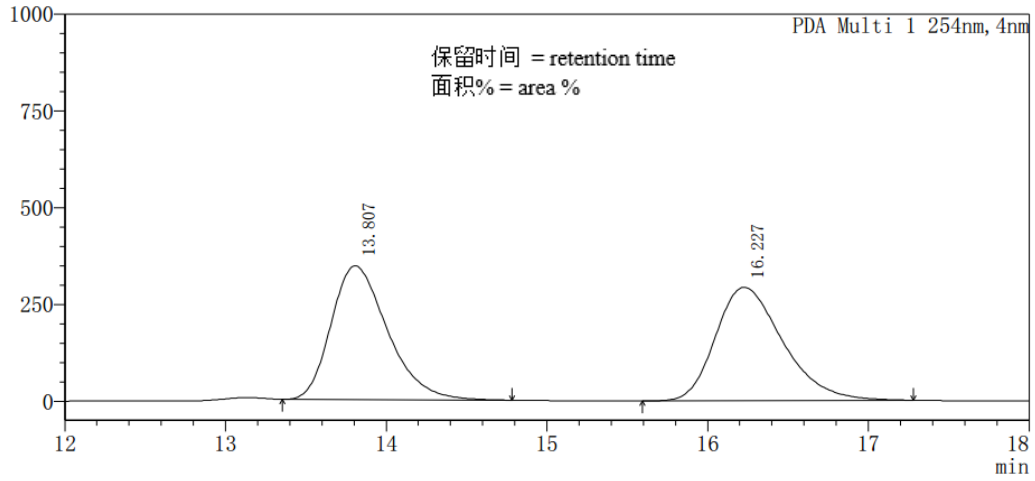

<峰表>

PDA Ch1 254nm

| 峰号 | 保留时间   | 面积       | 高度     | 化合物名 | 高度%     | 面积%     |
|----|--------|----------|--------|------|---------|---------|
| 1  | 13.807 | 8443416  | 345701 |      | 54.104  | 49.687  |
| 2  | 16.227 | 8549670  | 293253 |      | 45.896  | 50.313  |
| 总计 |        | 16993086 | 638954 |      | 100.000 | 100.000 |

<色谱图>

mAU

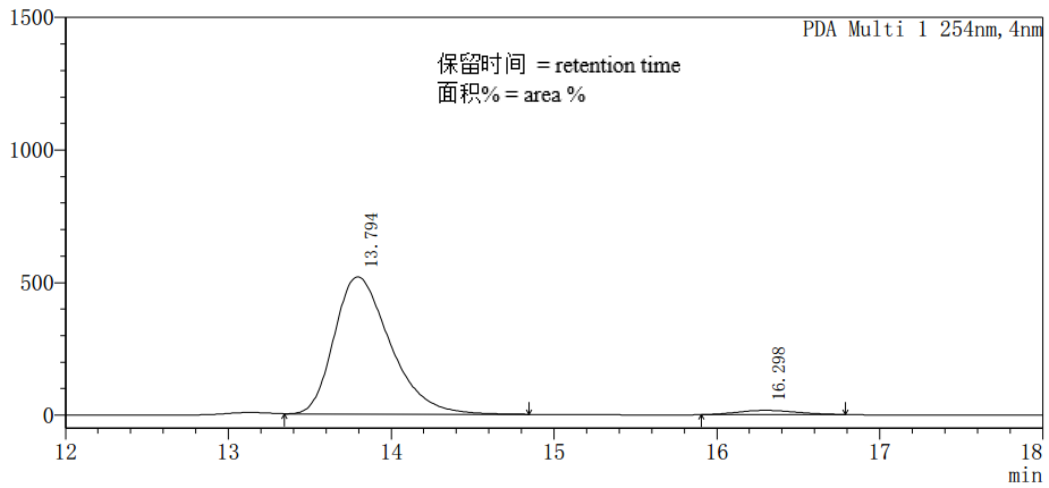

<峰表>

PDA Ch1 254nm

| 峰号 | 保留时间   | 面积       | 高度     | 化合物名 | 高度%     | 面积%     |
|----|--------|----------|--------|------|---------|---------|
| 1  | 13.794 | 12343901 | 517667 |      | 96.989  | 96.783  |
| 2  | 16.298 | 410282   | 16072  |      | 3.011   | 3.217   |
| 总计 |        | 12754182 | 533739 |      | 100.000 | 100.000 |

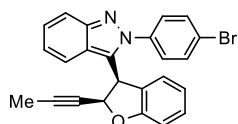

20

<色谱图>

mAU

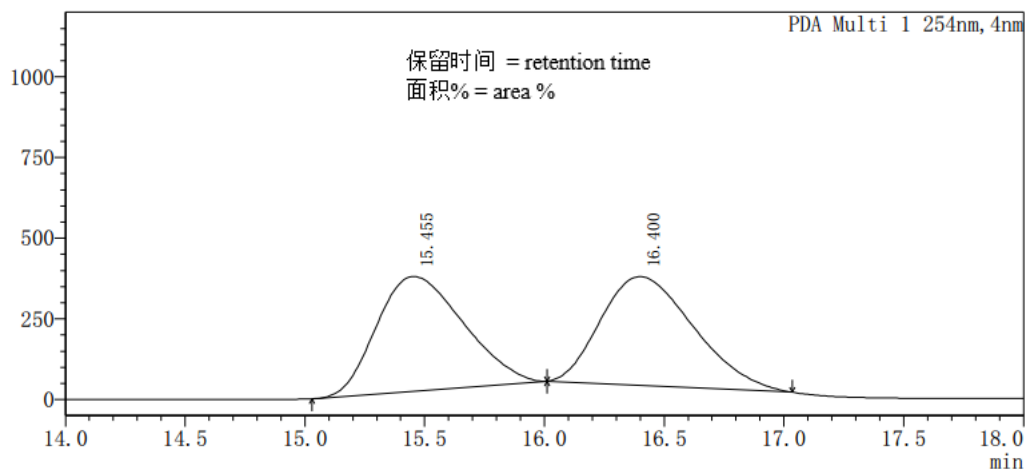

<峰表>

PDA Ch1 254nm

| 峰号 | 保留时间   | 面积       | 高度     | 化合物名 | 高度%     | 面积%     |
|----|--------|----------|--------|------|---------|---------|
| 1  | 15.455 | 8964325  | 355140 |      | 51.326  | 49.652  |
| 2  | 16.400 | 9090158  | 336791 |      | 48.674  | 50.348  |
| 总计 |        | 18054483 | 691931 |      | 100.000 | 100.000 |

<色谱图>

mAU

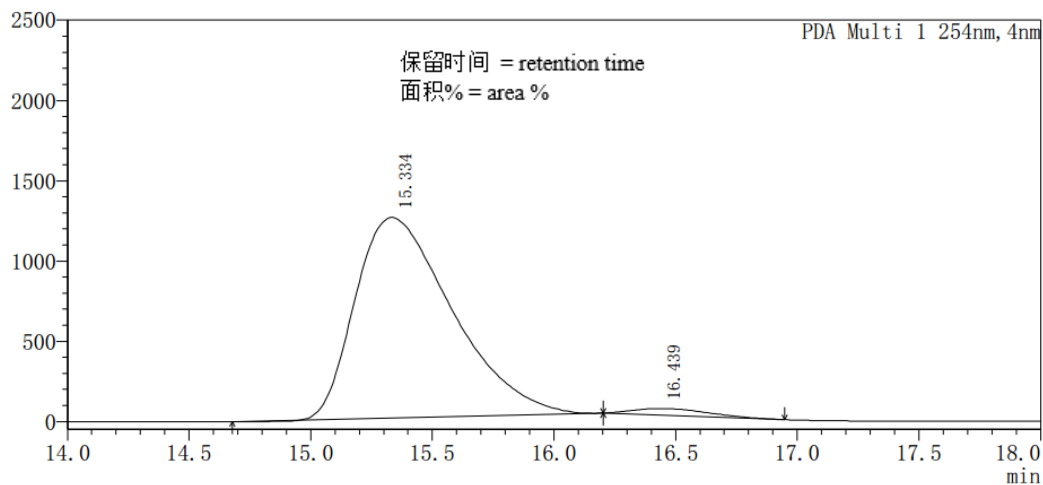

<峰表>

PDA Ch1 254nm

| 峰号 | 保留时间   | 面积       | 高度      | 化合物名 | 高度%     | 面积%     |
|----|--------|----------|---------|------|---------|---------|
| 1  | 15.334 | 34627961 | 1248297 |      | 96.794  | 97.467  |
| 2  | 16.439 | 899748   | 41351   |      | 3.206   | 2.533   |
| 总计 |        | 35527709 | 1289648 |      | 100.000 | 100.000 |

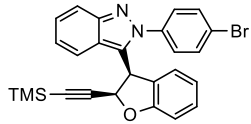

<色谱图>

mAU

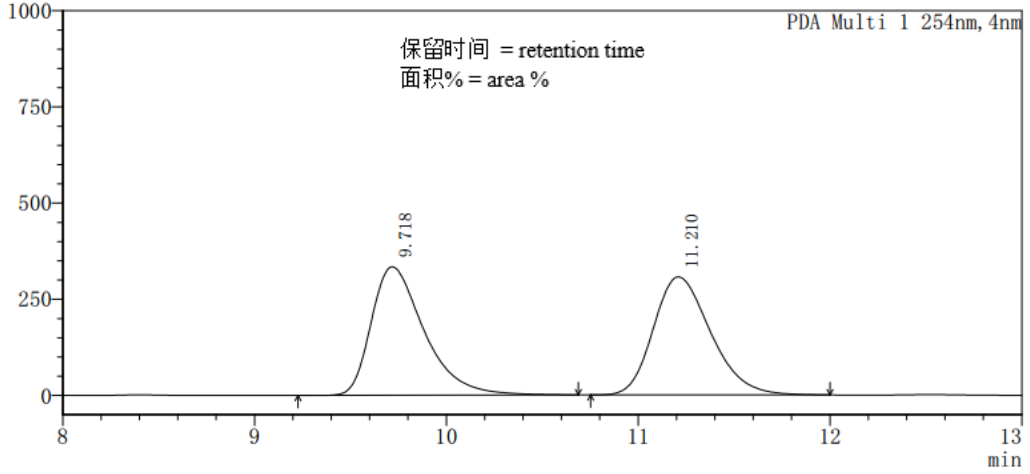

<峰表>

PDA Ch1 254nm

| 峰号 | 保留时间   | 高度     | 面积       | 化合物名 | 高度%     | 面积%     |
|----|--------|--------|----------|------|---------|---------|
| 1  | 9.718  | 334137 | 6414287  |      | 52.115  | 50.132  |
| 2  | 11.210 | 307022 | 6380622  |      | 47.885  | 49.868  |
| 总计 |        | 641158 | 12794909 |      | 100.000 | 100.000 |

<色谱图>

mAU

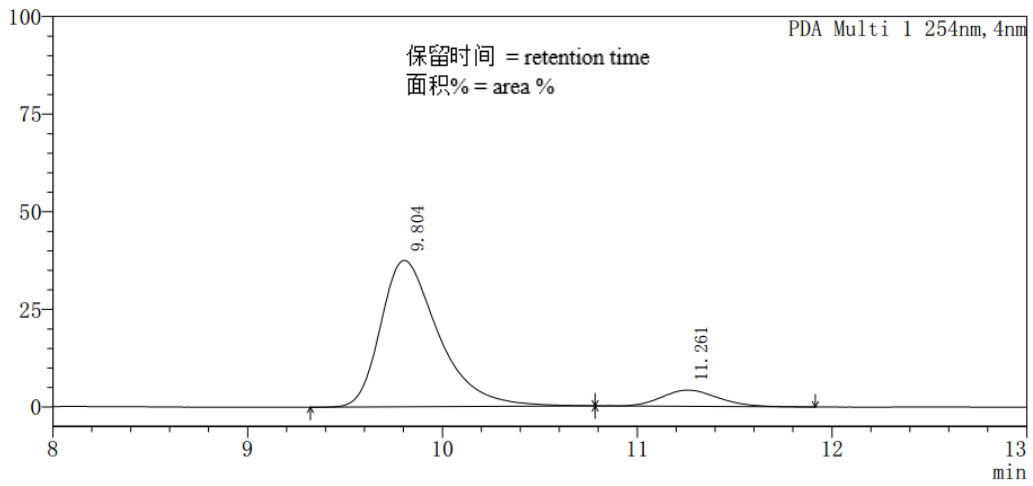

<峰表>

PDA Ch1 254nm

| 峰号 | 保留时间   | 高度    | 面积     | 化合物名 | 高度%     | 面积%     |
|----|--------|-------|--------|------|---------|---------|
| 1  | 9.804  | 37509 | 775119 |      | 90.050  | 90.266  |
| 2  | 11.261 | 4144  | 83582  |      | 9.950   | 9.734   |
| 总计 |        | 41653 | 858701 |      | 100.000 | 100.000 |

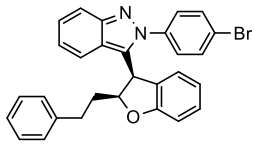

2q

<色谱图>

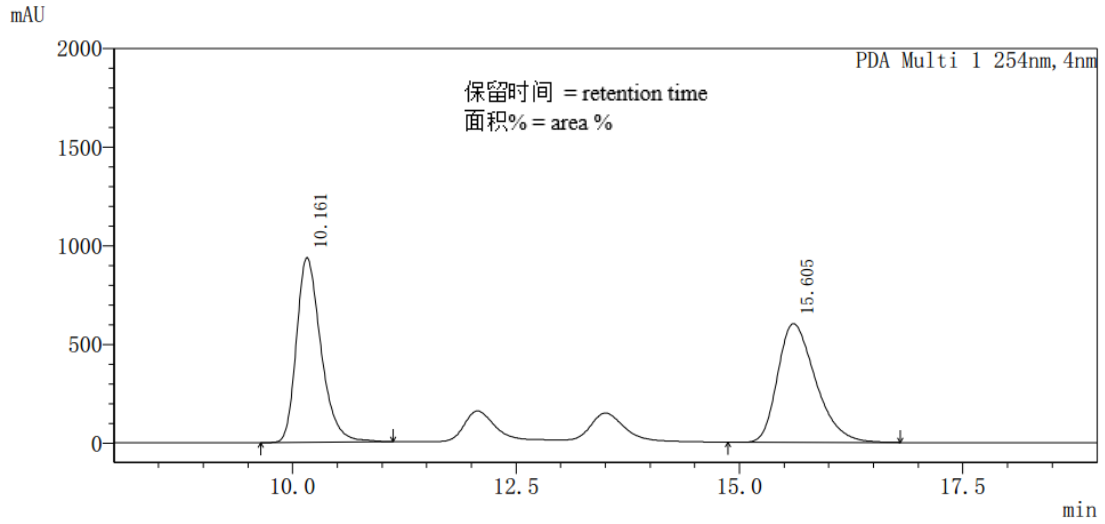

<峰表>

PDA Ch1 254nm

| 峰号 | 保留时间   | 面积       | 高度      | 化合物名 | 高度%     | 面积%     |
|----|--------|----------|---------|------|---------|---------|
| 1  | 10.161 | 17887190 | 937181  |      | 60.904  | 50.097  |
| 2  | 15.605 | 17817905 | 601597  |      | 39.096  | 49.903  |
| 总计 |        | 35705096 | 1538778 |      | 100.000 | 100.000 |

<色谱图>

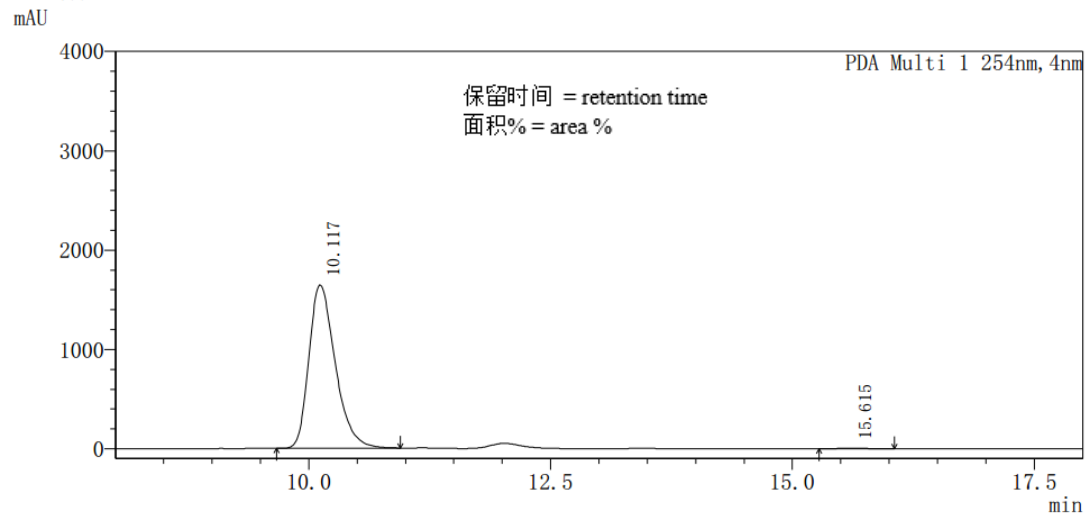

<峰表>

PDA Ch1 254nm

| 峰号 | 保留时间   | 面积       | 高度      | 化合物名 | 高度%     | 面积%     |
|----|--------|----------|---------|------|---------|---------|
| 1  | 10.117 | 31176387 | 1643393 |      | 99.814  | 99.764  |
| 2  | 15.615 | 73743    | 3059    |      | 0.186   | 0.236   |
| 总计 |        | 31250129 | 1646452 |      | 100.000 | 100.000 |

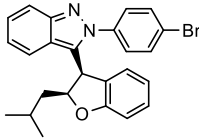

2r

<色谱图>

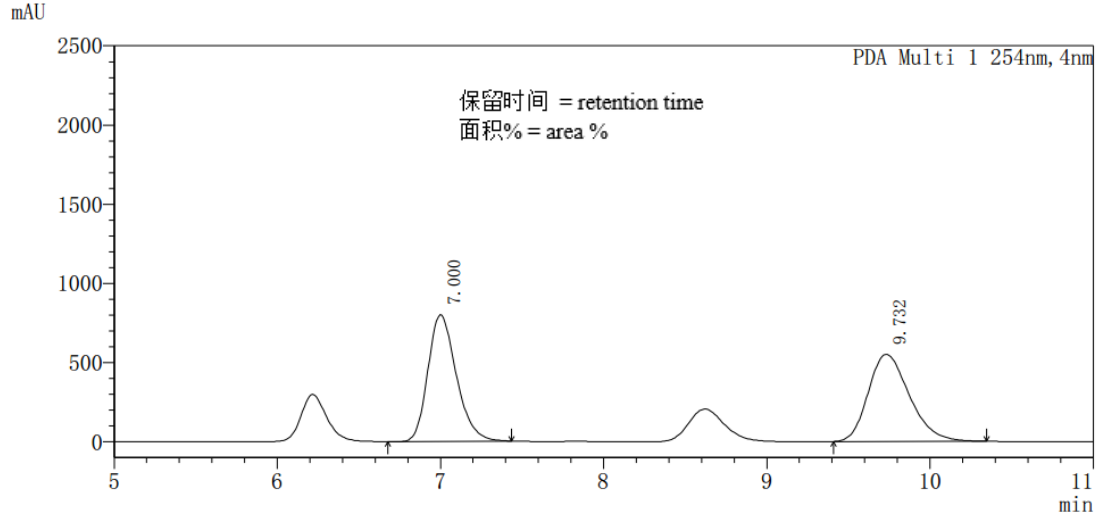

<峰表>

PDA Ch1 254nm

| 峰号 | 保留时间  | 面积       | 高度      | 化合物名 | 高度%     | 面积%     |
|----|-------|----------|---------|------|---------|---------|
| 1  | 7.000 | 9698675  | 800222  |      | 59.250  | 50.116  |
| 2  | 9.732 | 9653967  | 550361  |      | 40.750  | 49.884  |
| 总计 |       | 19352642 | 1350584 |      | 100.000 | 100.000 |

<色谱图>

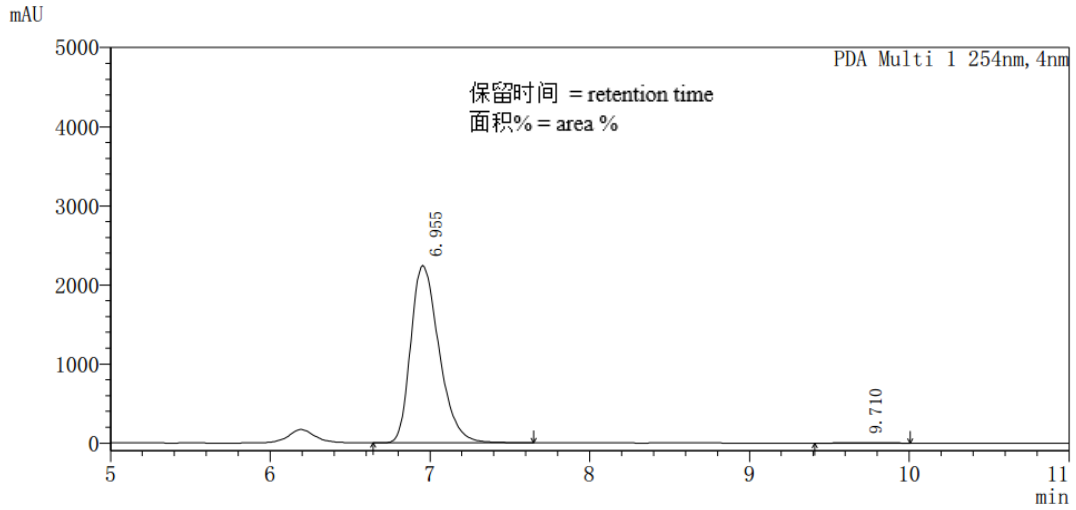

<峰表>

PDA Ch1 254nm

| 峰号 | 保留时间  | 面积       | 高度      | 化合物名 | 高度%     | 面积%     |
|----|-------|----------|---------|------|---------|---------|
| 1  | 6.955 | 27691151 | 2243402 |      | 99.793  | 99.730  |
| 2  | 9.710 | 75025    | 4645    |      | 0.207   | 0.270   |
| 总计 |       | 27766176 | 2248047 |      | 100.000 | 100.000 |

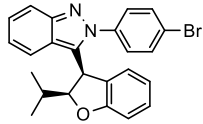

<色谱图>

mAU

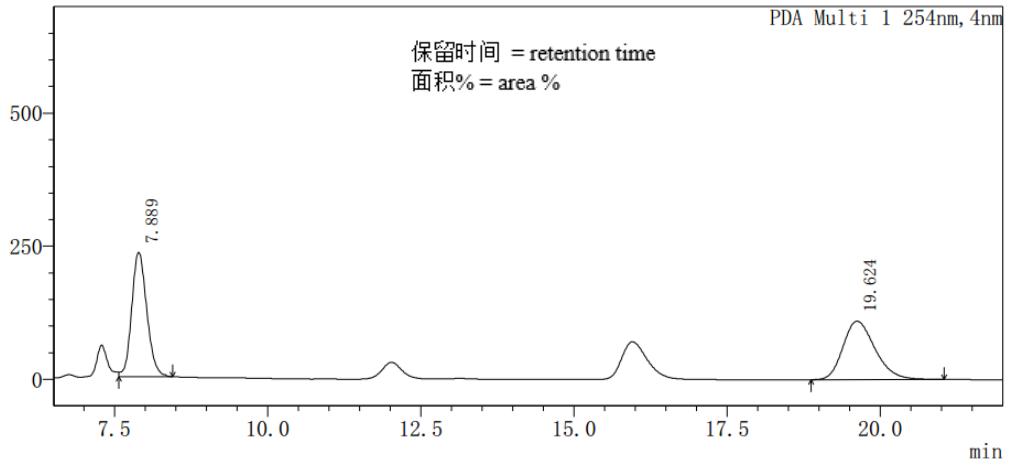

<峰表>

PDA Ch1 254nm

| 峰号 | 保留时间   | 面积      | 高度     | 化合物名 | 高度%     | 面积%     |
|----|--------|---------|--------|------|---------|---------|
| 1  | 7.889  | 4006538 | 233656 |      | 68.024  | 49.993  |
| 2  | 19.624 | 4007615 | 109833 |      | 31.976  | 50.007  |
| 总计 |        | 8014154 | 343489 |      | 100.000 | 100.000 |

<色谱图>

mAU

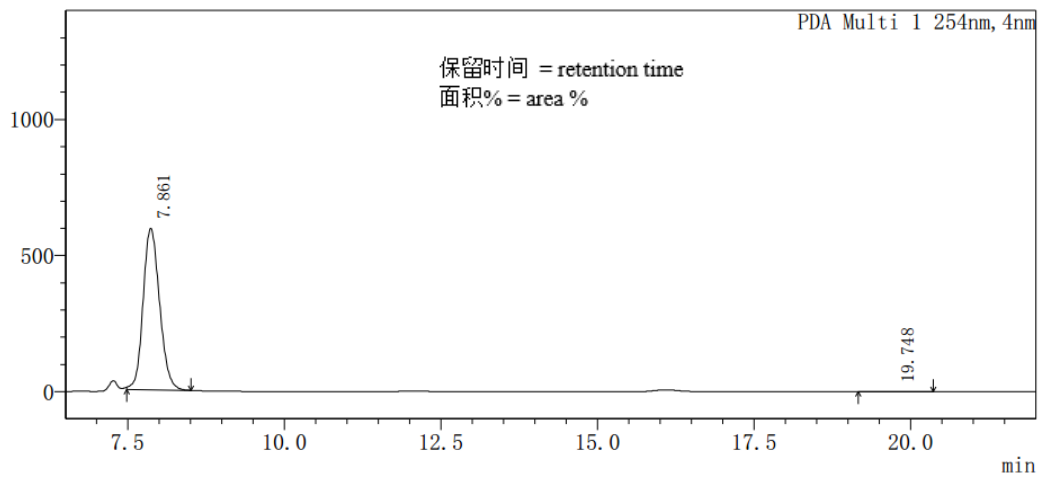

<峰表>

PDA Ch1 254nm

| 峰号 | 保留时间   | 面积       | 高度     | 化合物名 | 高度%     | 面积%     |
|----|--------|----------|--------|------|---------|---------|
| 1  | 7.861  | 10874405 | 593557 |      | 99.820  | 99.677  |
| 2  | 19.748 | 35288    | 1068   |      | 0.180   | 0.323   |
| 总计 |        | 10909692 | 594625 |      | 100.000 | 100.000 |

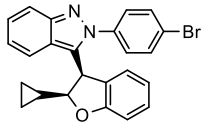

2t

<色谱图>

mAU

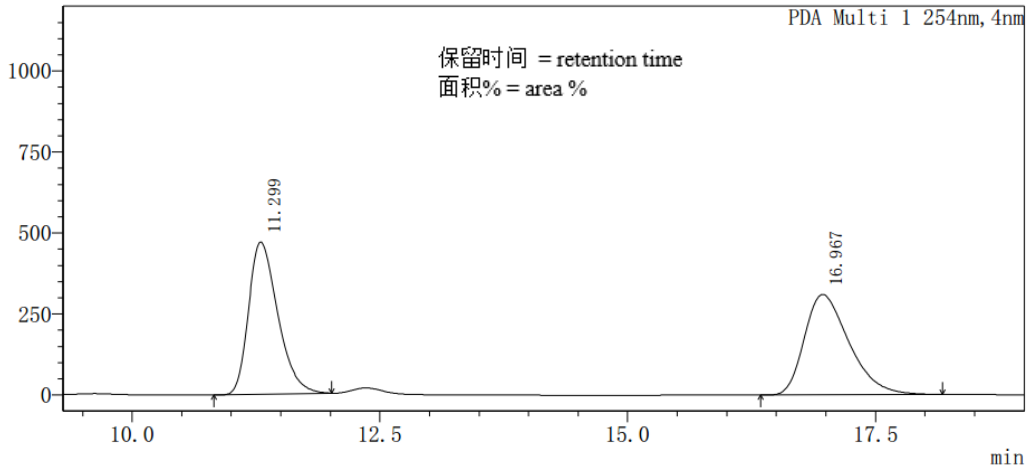

<峰表>

PDA Ch1 254nm

| 峰号 | 保留时间   | 面积       | 高度     | 化合物名 | 高度%     | 面积%     |
|----|--------|----------|--------|------|---------|---------|
| 1  | 11.299 | 9663913  | 470240 |      | 60.244  | 49.820  |
| 2  | 16.967 | 9733629  | 310316 |      | 39.756  | 50.180  |
| 总计 |        | 19397542 | 780556 |      | 100.000 | 100.000 |

<色谱图>

mAU

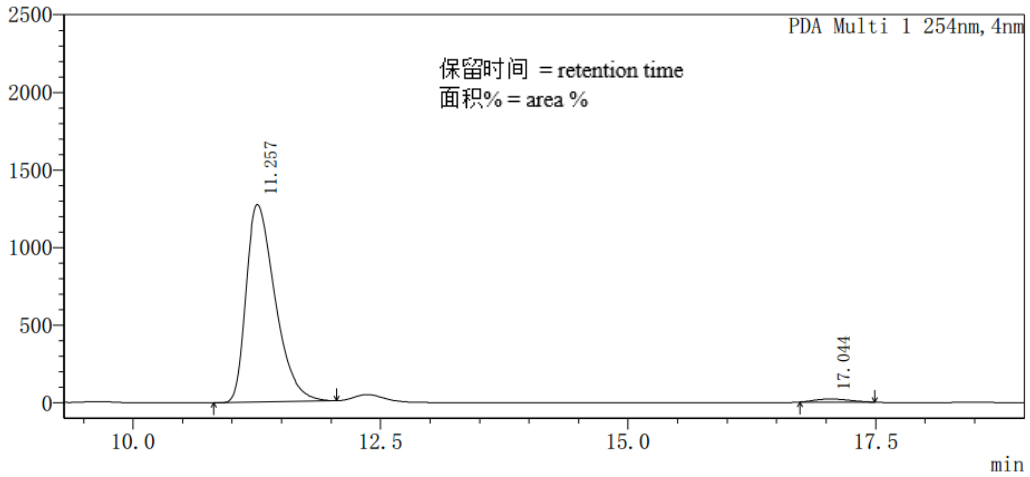

<峰表>

PDA Ch1 254nm

| 峰号 | 保留时间   | 面积       | 高度      | 化合物名 | 高度%     | 面积%     |
|----|--------|----------|---------|------|---------|---------|
| 1  | 11.257 | 26049881 | 1273051 |      | 98.463  | 98.174  |
| 2  | 17.044 | 484518   | 19869   |      | 1.537   | 1.826   |
| 总计 |        | 26534400 | 1292920 |      | 100.000 | 100.000 |



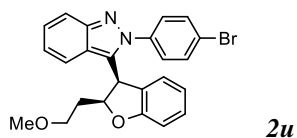

<色谱图>

mAU

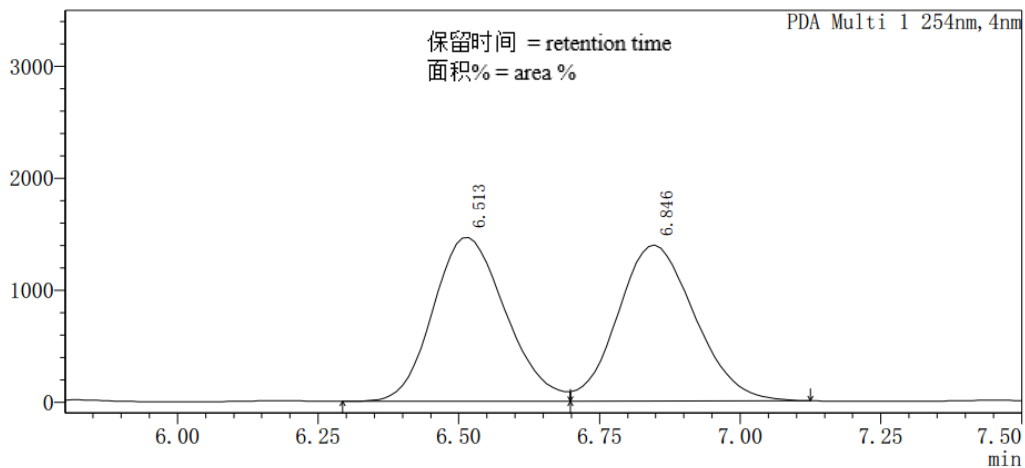

<峰表>

PDA Ch1 254nm

| 峰号 | 保留时间  | 面积       | 高度      | 化合物名 | 高度%     | 面积%     |
|----|-------|----------|---------|------|---------|---------|
| 1  | 6.513 | 13148989 | 1464044 |      | 51.248  | 49.905  |
| 2  | 6.846 | 13199202 | 1392746 |      | 48.752  | 50.095  |
| 总计 |       | 26348191 | 2856790 |      | 100.000 | 100.000 |

<色谱图>

mAU

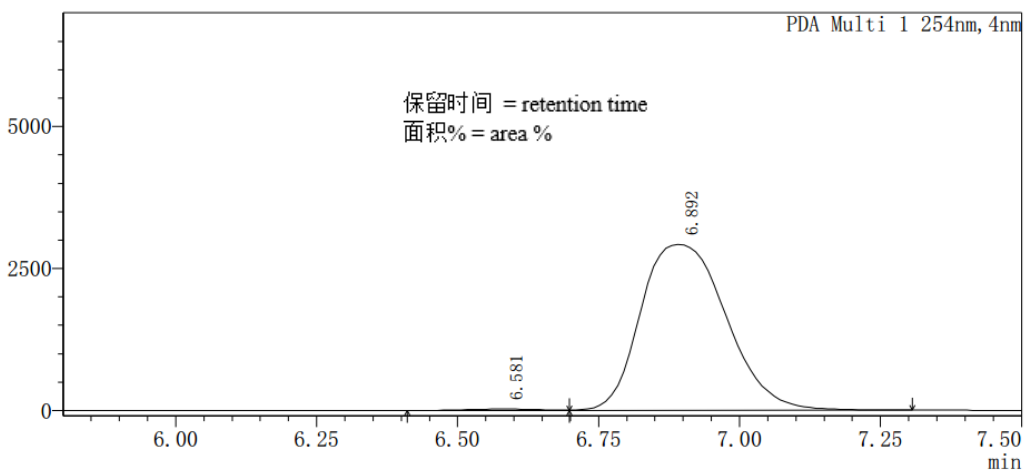

<峰表>

PDA Ch1 254nm

| 峰号 | 保留时间  | 面积       | 高度      | 化合物名 | 高度%     | 面积%     |
|----|-------|----------|---------|------|---------|---------|
| 1  | 6.581 | 195480   | 24298   |      | 0.826   | 0.631   |
| 2  | 6.892 | 30785184 | 2917853 |      | 99.174  | 99.369  |
| 总计 |       | 30980664 | 2942151 |      | 100.000 | 100.000 |

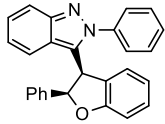

2v

<色谱图>

mAU

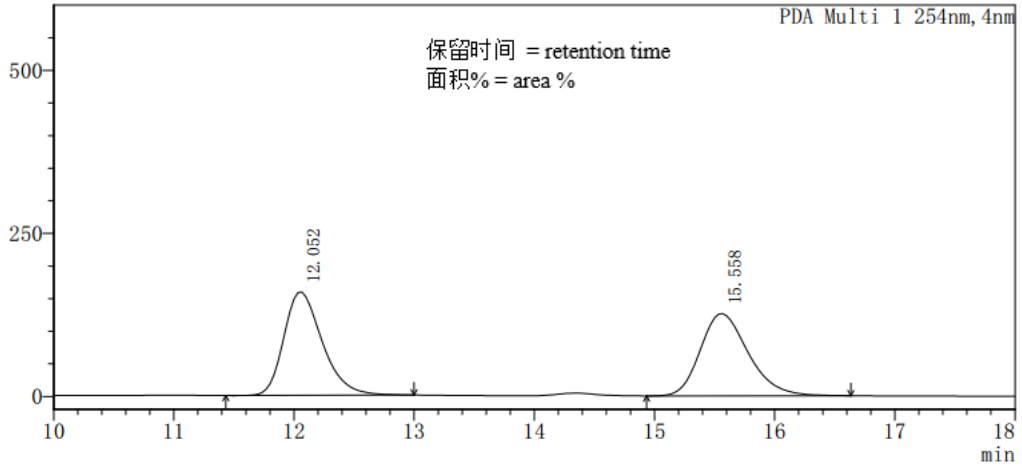

<峰表>

PDA Ch1 254nm

| 峰号 | 保留时间   | 面积      | 高度     | 化合物名 | 高度%     | 面积%     |
|----|--------|---------|--------|------|---------|---------|
| 1  | 12.052 | 3536481 | 158466 |      | 55.654  | 50.269  |
| 2  | 15.558 | 3498684 | 126268 |      | 44.346  | 49.731  |
| 总计 |        | 7035165 | 284734 |      | 100.000 | 100.000 |

<色谱图>

mAU

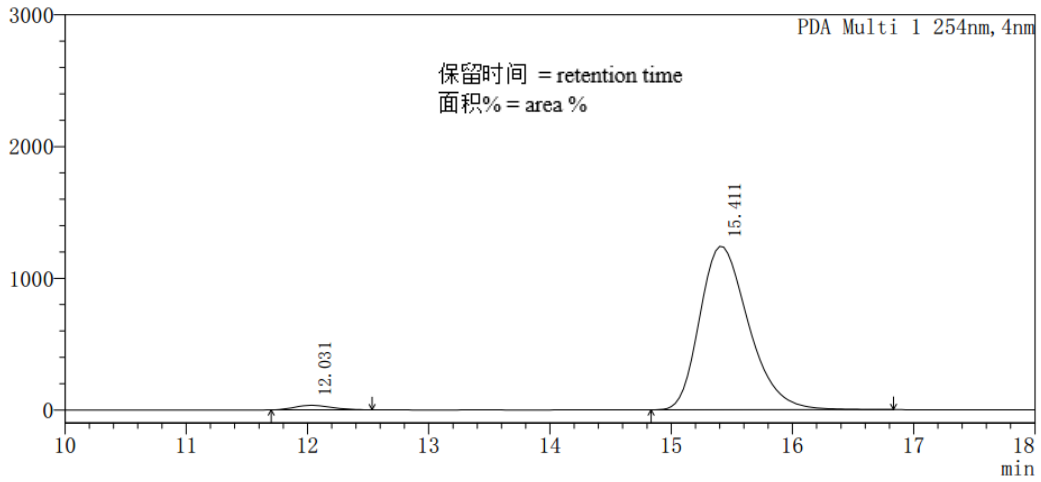

<峰表>

PDA Ch1 254nm

| 峰号 | 保留时间   | 面积       | 高度      | 化合物名 | 高度%     | 面积%     |
|----|--------|----------|---------|------|---------|---------|
| 1  | 12.031 | 707435   | 34090   |      | 2.673   | 1.989   |
| 2  | 15.411 | 34858944 | 1241496 |      | 97.327  | 98.011  |
| 总计 |        | 35566379 | 1275587 |      | 100.000 | 100.000 |

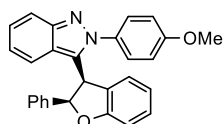

2w

<色谱图>

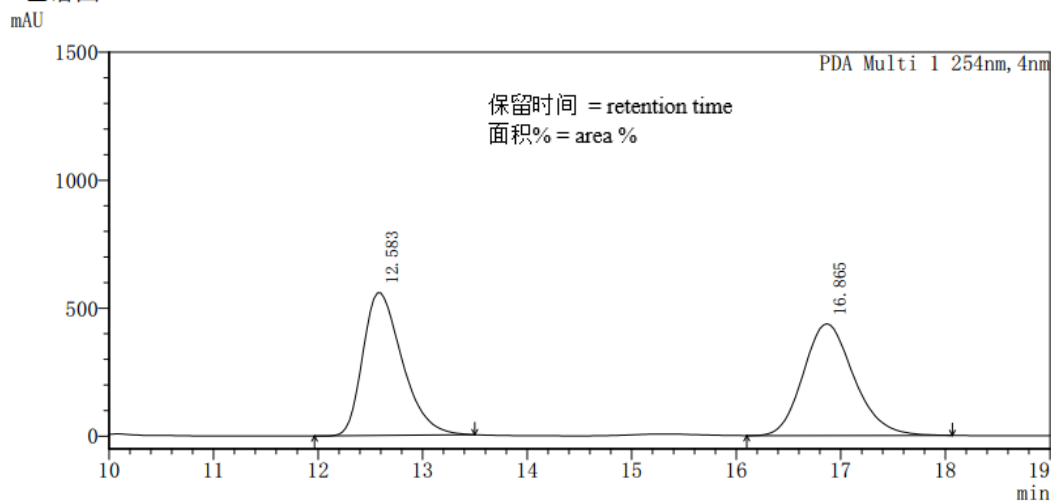

<峰表>

PDA Ch1 254nm

| 峰号 | 保留时间   | 面积       | 高度     | 化合物名 | 高度%     | 面积%     |
|----|--------|----------|--------|------|---------|---------|
| 1  | 12.583 | 14652850 | 557456 |      | 56.056  | 49.931  |
| 2  | 16.865 | 14693231 | 437009 |      | 43.944  | 50.069  |
| 总计 |        | 29346082 | 994465 |      | 100.000 | 100.000 |

<色谱图>

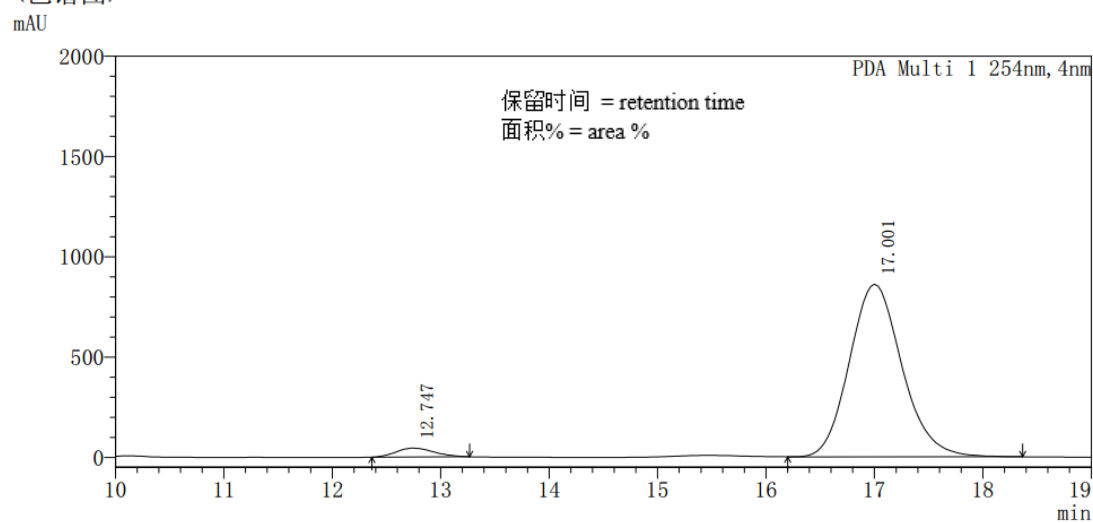

<峰表>

PDA Ch1 254nm

| 峰号 | 保留时间   | 面积       | 高度     | 化合物名 | 高度%     | 面积%     |
|----|--------|----------|--------|------|---------|---------|
| 1  | 12.747 | 1064642  | 44030  |      | 4.864   | 3.543   |
| 2  | 17.001 | 28986600 | 861277 |      | 95.136  | 96.457  |
| 总计 |        | 30051242 | 905307 |      | 100.000 | 100.000 |

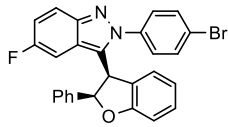

2x

<色谱图>

mAU

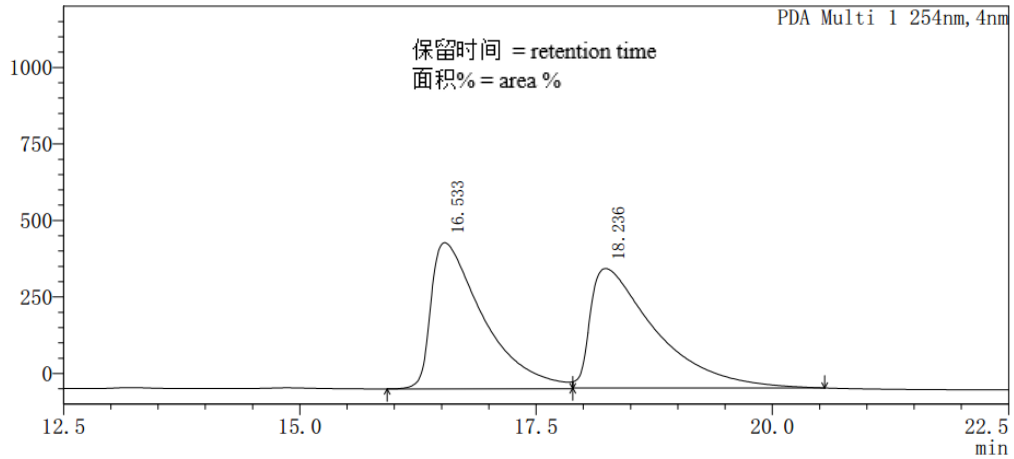

<峰表>

PDA Ch1 254nm

| 峰号 | 保留时间   | 面积       | 高度     | 化合物名 | 高度%     | 面积%     |
|----|--------|----------|--------|------|---------|---------|
| 1  | 16.533 | 18534804 | 477636 |      | 55.016  | 49.582  |
| 2  | 18.236 | 18847588 | 390548 |      | 44.984  | 50.418  |
| 总计 |        | 37382392 | 868184 |      | 100.000 | 100.000 |

<色谱图>

mAU

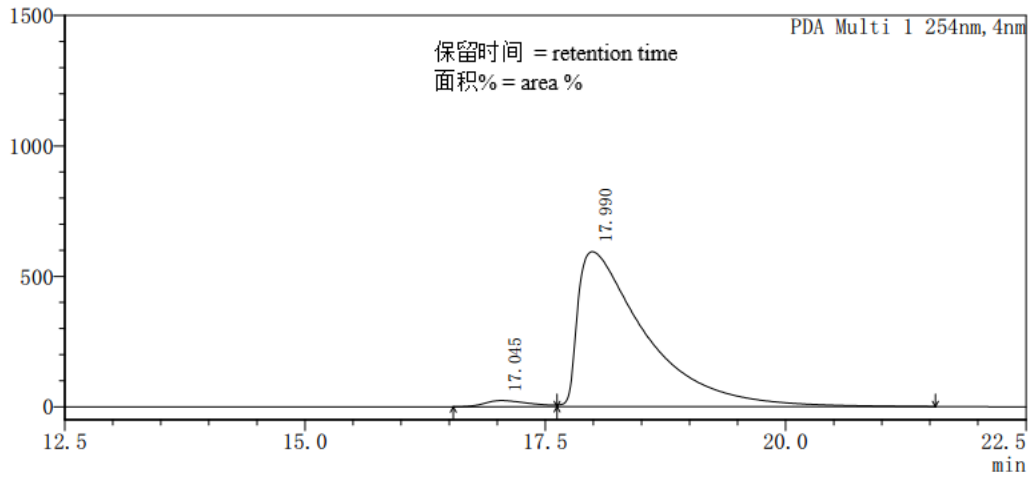

<峰表>

PDA Ch1 254nm

| 峰号 | 保留时间   | 高度     | 面积       | 化合物名 | 高度%     | 面积%     |
|----|--------|--------|----------|------|---------|---------|
| 1  | 17.045 | 23804  | 781965   |      | 3.855   | 2.599   |
| 2  | 17.990 | 593711 | 29308018 |      | 96.145  | 97.401  |
| 总计 |        | 617514 | 30089982 |      | 100.000 | 100.000 |

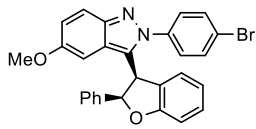

2y

<色谱图>

mAU

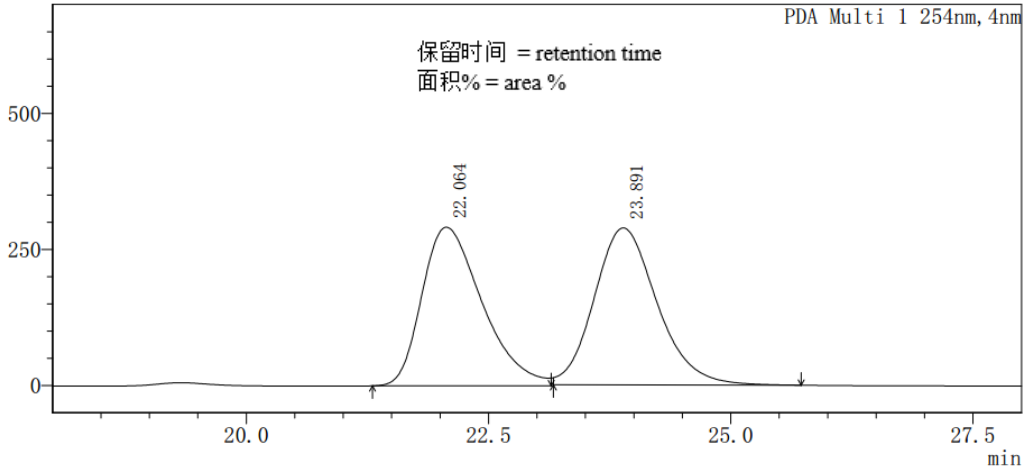

<峰表>

PDA Ch1 254nm

| 峰号 | 保留时间   | 面积       | 高度     | 化合物名 | 高度%     | 面积%     |
|----|--------|----------|--------|------|---------|---------|
| 1  | 22.064 | 12597757 | 291251 |      | 50.252  | 49.165  |
| 2  | 23.891 | 13025887 | 288332 |      | 49.748  | 50.835  |
| 总计 |        | 25623644 | 579583 |      | 100.000 | 100.000 |

<色谱图>

mAU

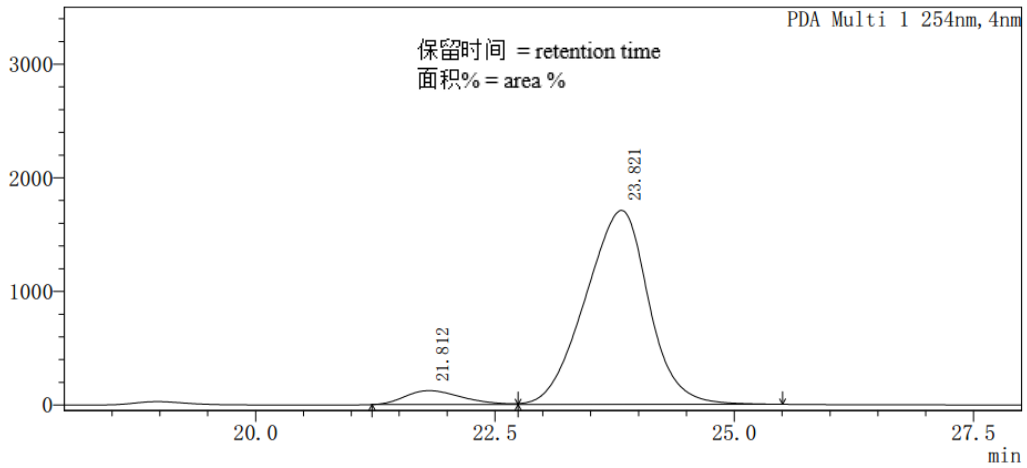

<峰表>

PDA Ch1 254nm

| 峰号 | 保留时间   | 面积       | 高度      | 化合物名 | 高度%     | 面积%     |
|----|--------|----------|---------|------|---------|---------|
| 1  | 21.812 | 5077916  | 122744  |      | 6.702   | 6.058   |
| 2  | 23.821 | 78744892 | 1708814 |      | 93.298  | 93.942  |
| 总计 |        | 83822808 | 1831558 |      | 100.000 | 100.000 |

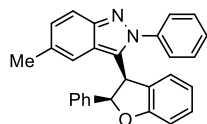

2z

<色谱图>

mAU

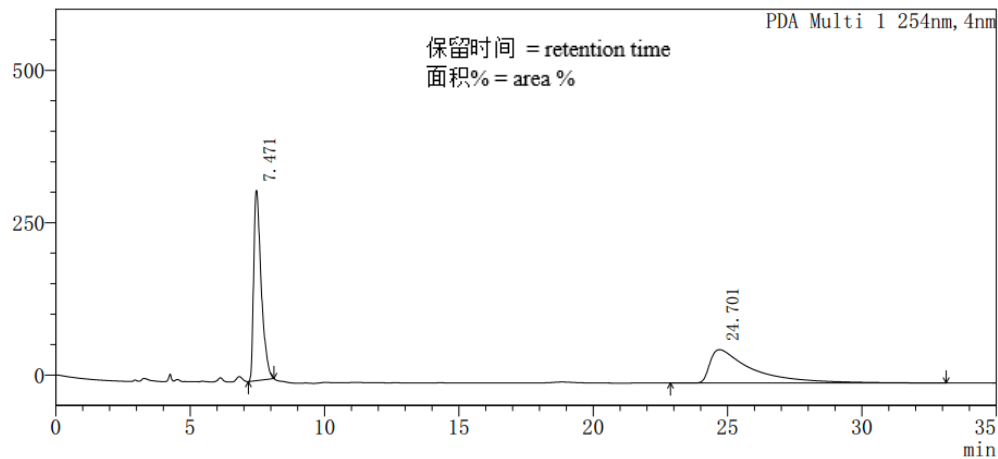

<峰表>

PDA Ch1 254nm

| 峰号 | 保留时间   | 面积       | 高度     | 化合物名 | 高度%     | 面积%     |
|----|--------|----------|--------|------|---------|---------|
| 1  | 7.471  | 6072926  | 312419 |      | 85.086  | 50.570  |
| 2  | 24.701 | 5935995  | 54762  |      | 14.914  | 49.430  |
| 总计 |        | 12008920 | 367181 |      | 100.000 | 100.000 |

<色谱图>

mAU

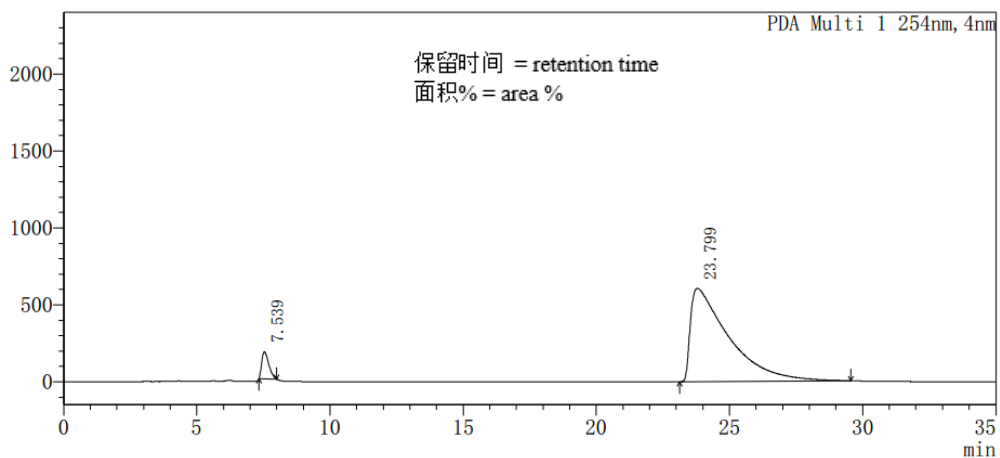

<峰表>

PDA Ch1 254nm

| 峰号 | 保留时间   | 面积       | 高度     | 化合物名 | 高度%     | 面积%     |
|----|--------|----------|--------|------|---------|---------|
| 1  | 7.539  | 3181488  | 174744 |      | 22.388  | 4.972   |
| 2  | 23.799 | 60809875 | 605781 |      | 77.612  | 95.028  |
| 总计 |        | 63991363 | 780525 |      | 100.000 | 100.000 |

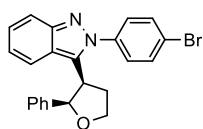

**2aa**

<色谱图>

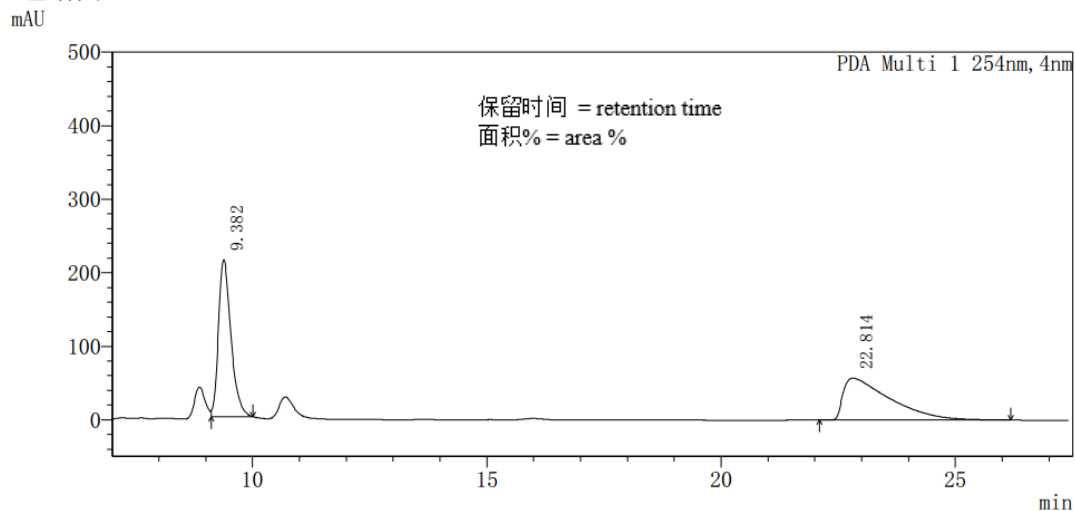

<峰表>

PDA Ch1 254nm

| 峰号 | 保留时间   | 面积      | 高度     | 化合物名 | 高度%     | 面积%     |
|----|--------|---------|--------|------|---------|---------|
| 1  | 9.382  | 3957128 | 213849 |      | 78.981  | 50.100  |
| 2  | 22.814 | 3941378 | 56912  |      | 21.019  | 49.900  |
| 总计 |        | 7898506 | 270761 |      | 100.000 | 100.000 |

<色谱图>

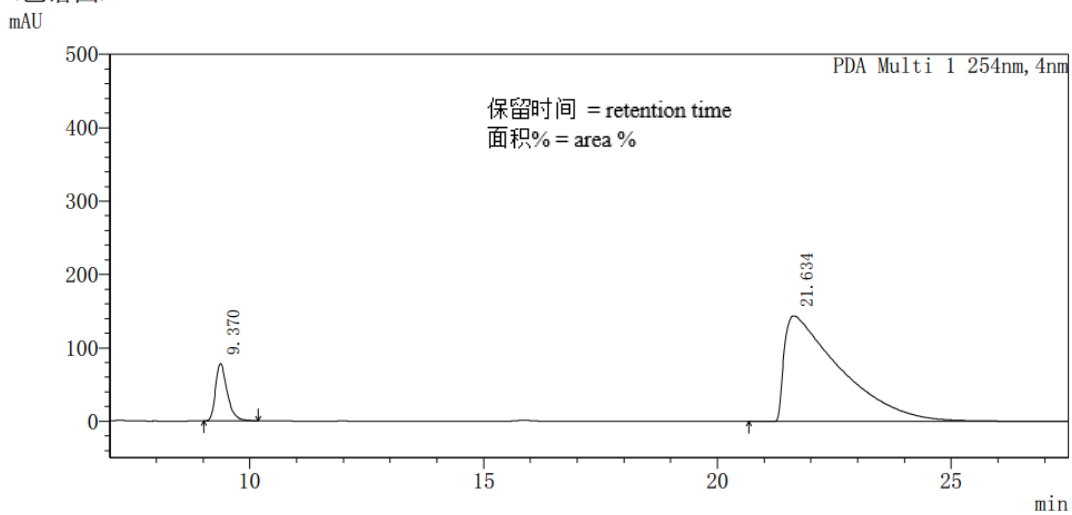

<峰表>

PDA Ch1 254nm

| 峰号 | 保留时间   | 面积       | 高度     | 化合物名 | 高度%     | 面积%     |
|----|--------|----------|--------|------|---------|---------|
| 1  | 9.370  | 1360245  | 78379  |      | 35.252  | 10.170  |
| 2  | 21.634 | 12014372 | 143961 |      | 64.748  | 89.830  |
| 总计 |        | 13374617 | 222341 |      | 100.000 | 100.000 |

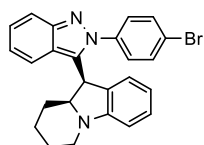

2ab

<色谱图>

mAU

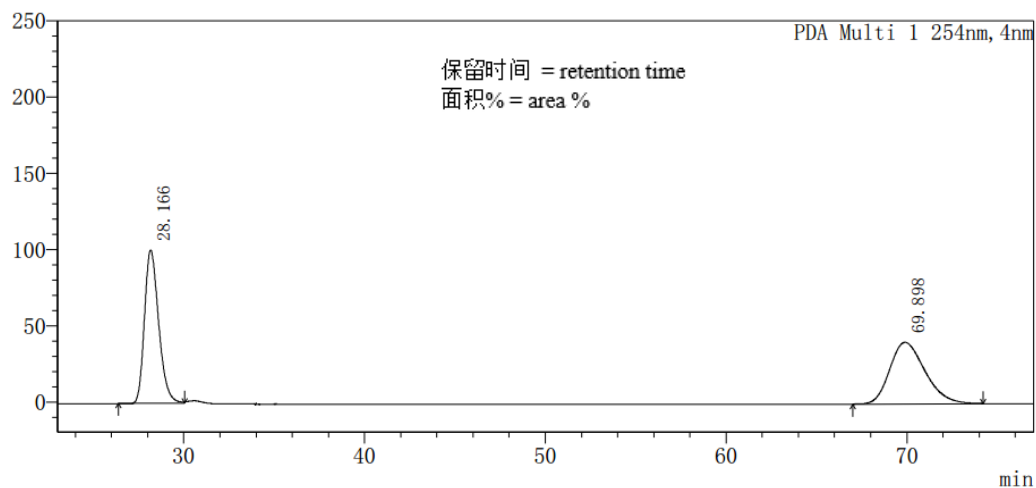

<峰表>

PDA Ch1 254nm

| 峰号 | 保留时间   | 面积       | 高度     | 化合物名 | 高度%     | 面积%     |
|----|--------|----------|--------|------|---------|---------|
| 1  | 28.166 | 5475580  | 100702 |      | 71.372  | 49.984  |
| 2  | 69.898 | 5478986  | 40393  |      | 28.628  | 50.016  |
| 总计 |        | 10954566 | 141095 |      | 100.000 | 100.000 |

<色谱图>

mAU

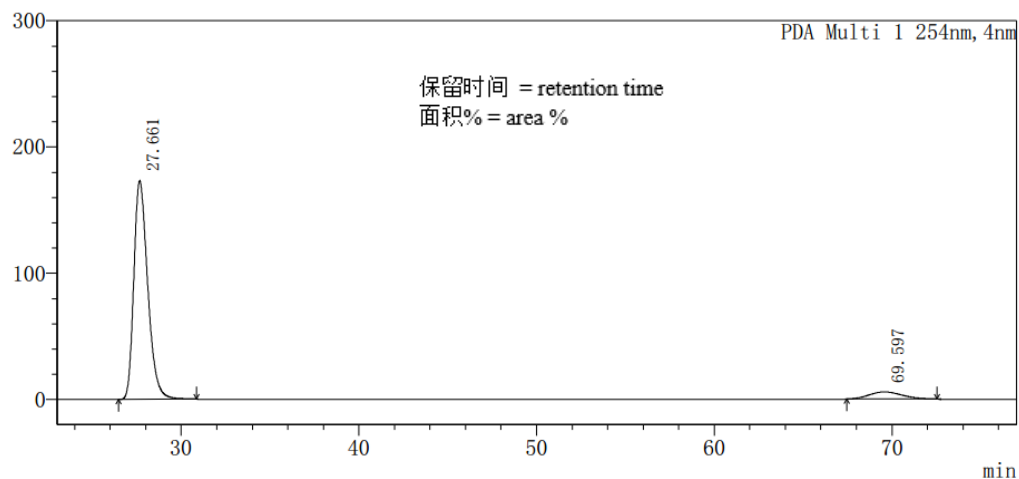

<峰表>

PDA Ch1 254nm

| 峰号 | 保留时间   | 面积       | 高度     | 化合物名 | 高度%     | 面积%     |
|----|--------|----------|--------|------|---------|---------|
| 1  | 27.661 | 9434579  | 173235 |      | 96.814  | 92.733  |
| 2  | 69.597 | 739324   | 5700   |      | 3.186   | 7.267   |
| 总计 |        | 10173903 | 178935 |      | 100.000 | 100.000 |



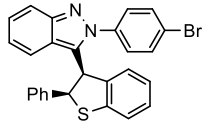

**2ac**

<色谱图>

mAU

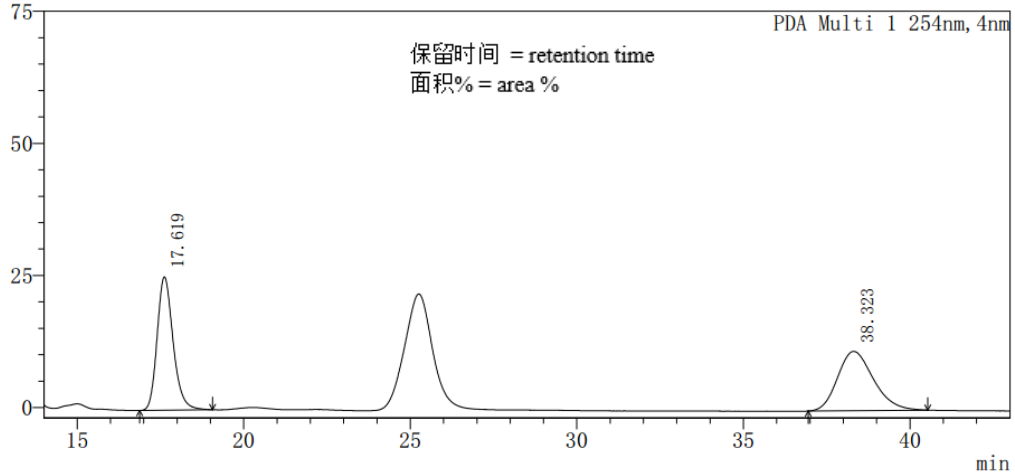

<峰表>

PDA Ch1 254nm

| 峰号 | 保留时间   | 面积      | 高度    | 化合物名 | 高度%     | 面积%     |
|----|--------|---------|-------|------|---------|---------|
| 1  | 17.619 | 844592  | 25264 |      | 69.228  | 50.118  |
| 2  | 38.323 | 840604  | 11230 |      | 30.772  | 49.882  |
| 总计 |        | 1685196 | 36494 |      | 100.000 | 100.000 |

<色谱图>

mAU

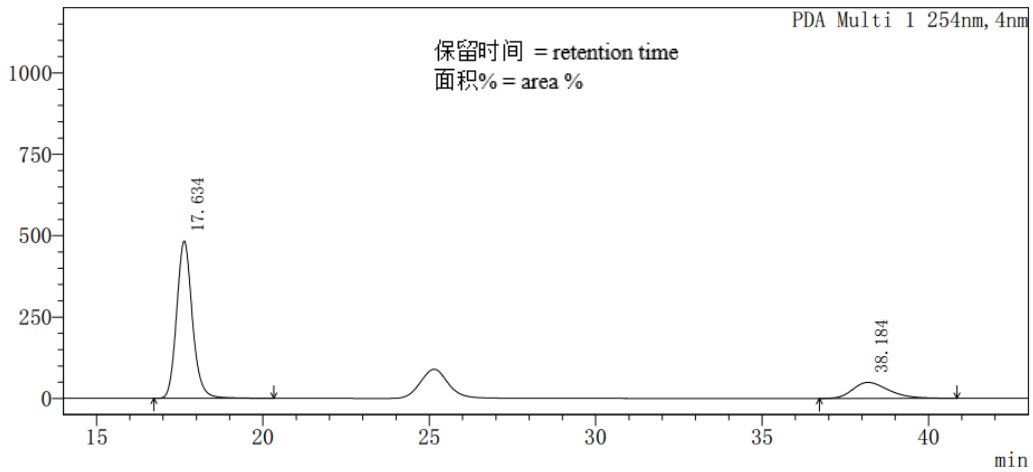

<峰表>

PDA Ch1 254nm

| 峰号 | 保留时间   | 面积       | 高度     | 化合物名 | 高度%     | 面积%     |
|----|--------|----------|--------|------|---------|---------|
| 1  | 17.634 | 15870465 | 483579 |      | 90.788  | 81.206  |
| 2  | 38.184 | 3672968  | 49069  |      | 9.212   | 18.794  |
| 总计 |        | 19543432 | 532648 |      | 100.000 | 100.000 |

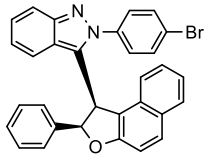

4a

<色谱图>

mAU

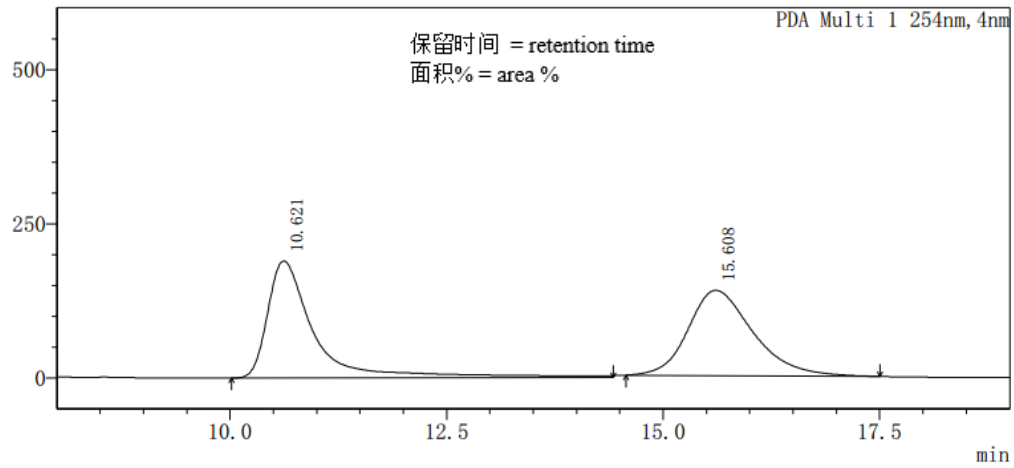

<峰表>

PDA Ch1 254nm

| 峰号 | 保留时间   | 面积       | 高度     | 化合物名 | 高度%     | 面积%     |
|----|--------|----------|--------|------|---------|---------|
| 1  | 10.621 | 7208166  | 189535 |      | 57.824  | 49.956  |
| 2  | 15.608 | 7220831  | 138243 |      | 42.176  | 50.044  |
| 总计 |        | 14428997 | 327778 |      | 100.000 | 100.000 |

<色谱图>

mAU

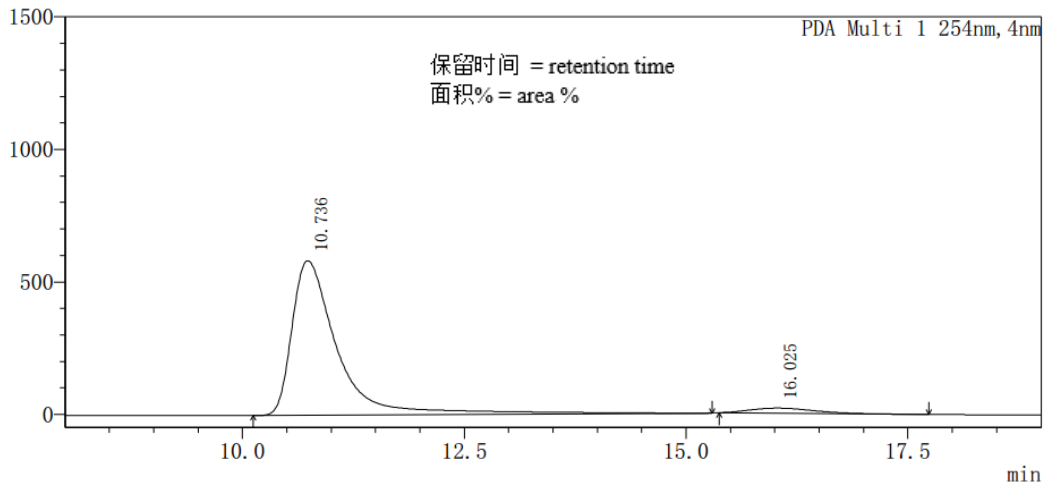

<峰表>

PDA Ch1 254nm

| 峰号 | 保留时间   | 面积       | 高度     | 化合物名 | 高度%     | 面积%     |
|----|--------|----------|--------|------|---------|---------|
| 1  | 10.736 | 21158178 | 583360 |      | 96.809  | 95.610  |
| 2  | 16.025 | 971410   | 19231  |      | 3.191   | 4.390   |
| 总计 |        | 22129588 | 602591 |      | 100.000 | 100.000 |

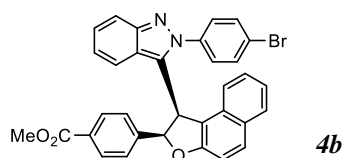

<色谱图>

mAU

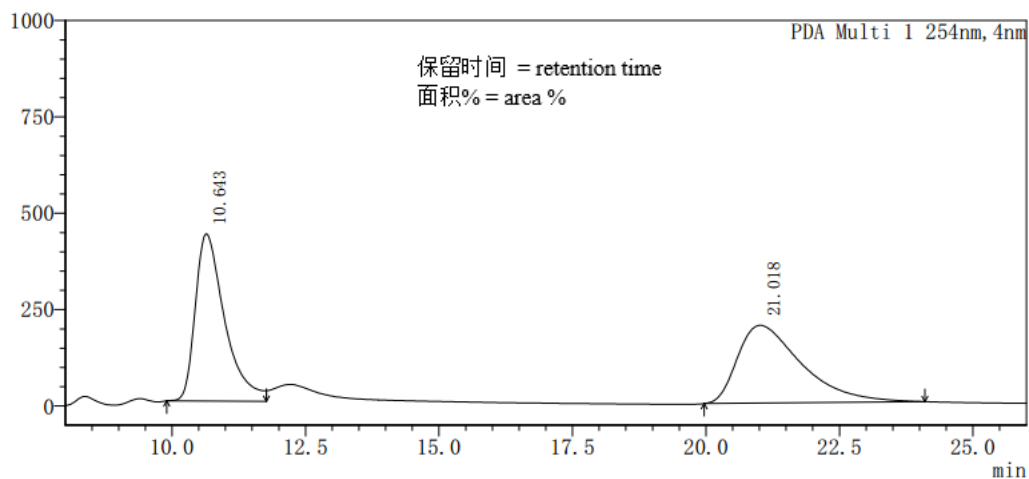

<峰表>

PDA Ch1 254nm

| 峰号 | 保留时间   | 面积       | 高度     | 化合物名 | 高度%     | 面积%     |
|----|--------|----------|--------|------|---------|---------|
| 1  | 10.643 | 16657792 | 433969 |      | 68.254  | 49.757  |
| 2  | 21.018 | 16820642 | 201850 |      | 31.746  | 50.243  |
| 总计 |        | 33478434 | 635819 |      | 100.000 | 100.000 |

<色谱图>

mAU

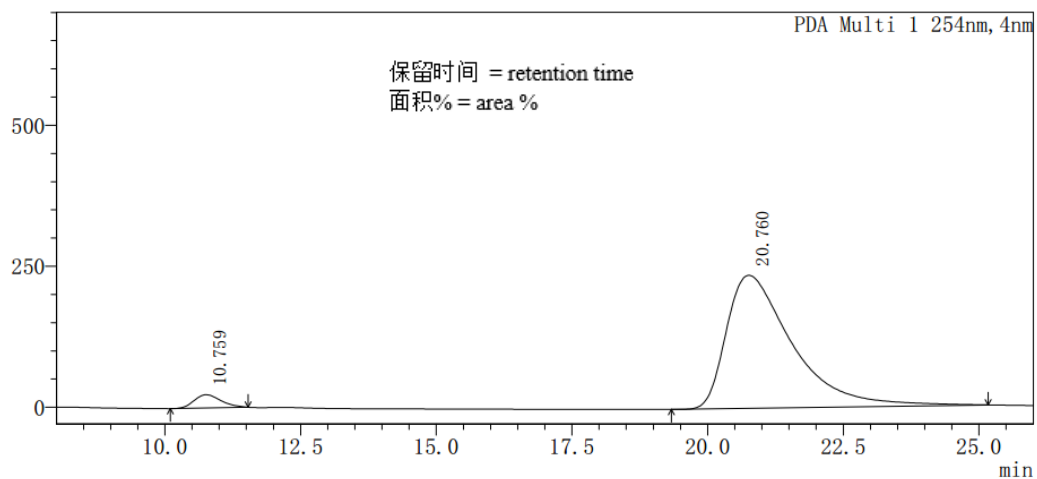

<峰表>

PDA Ch1 254nm

| 峰号 | 保留时间   | 面积       | 高度     | 化合物名 | 高度%     | 面积%     |
|----|--------|----------|--------|------|---------|---------|
| 1  | 10.759 | 817262   | 23567  |      | 9.079   | 3.928   |
| 2  | 20.760 | 19990281 | 236004 |      | 90.921  | 96.072  |
| 总计 |        | 20807543 | 259571 |      | 100.000 | 100.000 |

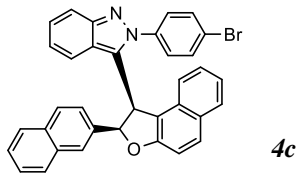

<色谱图>

mAU

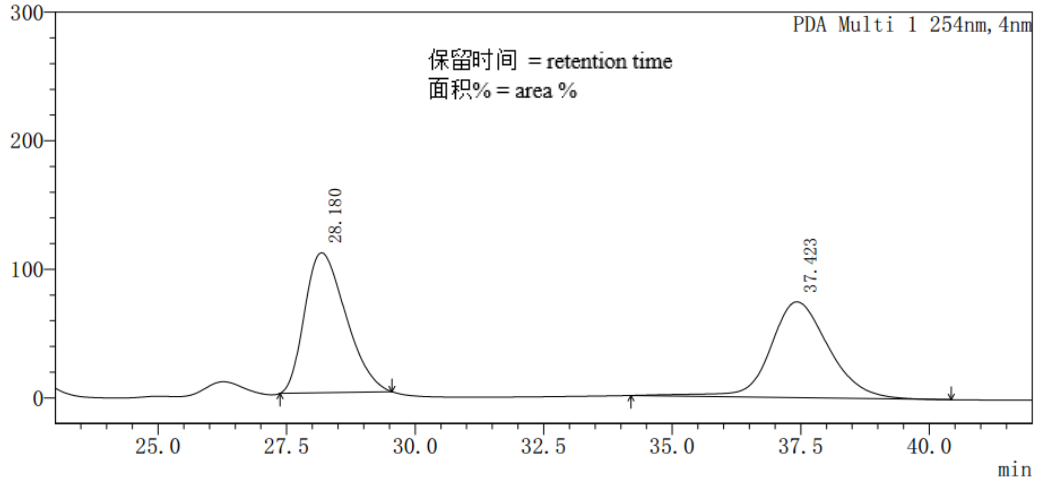

<峰表>

PDA Ch1 254nm

| 峰号 | 保留时间   | 面积       | 高度     | 化合物名 | 高度%     | 面积%     |
|----|--------|----------|--------|------|---------|---------|
| 1  | 28.180 | 6076728  | 108799 |      | 59.339  | 50.682  |
| 2  | 37.423 | 5913241  | 74553  |      | 40.661  | 49.318  |
| 总计 |        | 11989969 | 183352 |      | 100.000 | 100.000 |

<色谱图>

mAU

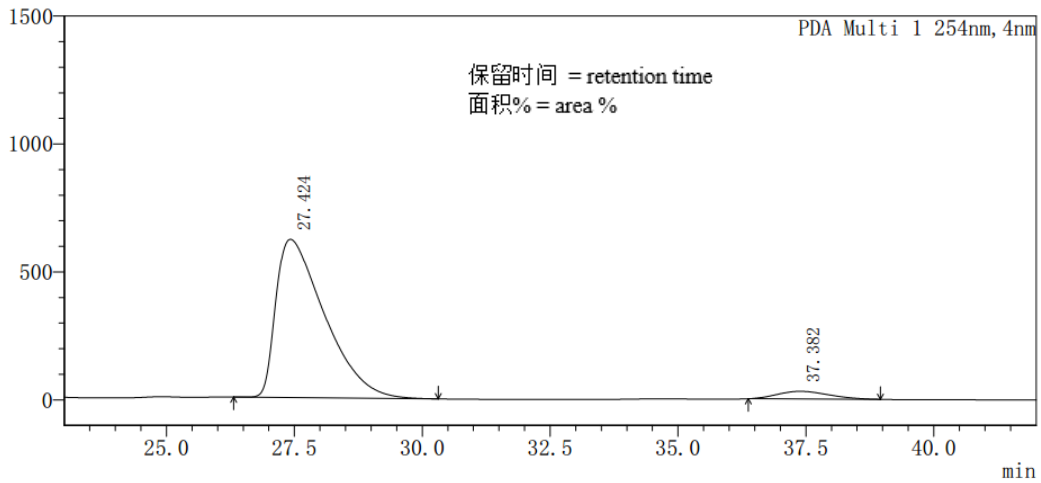

<峰表>

PDA Ch1 254nm

| 峰号 | 保留时间   | 面积       | 高度     | 化合物名 | 高度%     | 面积%     |
|----|--------|----------|--------|------|---------|---------|
| 1  | 27.424 | 40950208 | 618287 |      | 95.386  | 95.138  |
| 2  | 37.382 | 2092658  | 29910  |      | 4.614   | 4.862   |
| 总计 |        | 43042866 | 648197 |      | 100.000 | 100.000 |

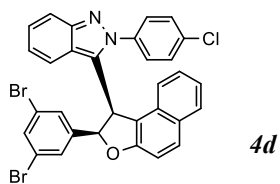

<色谱图>

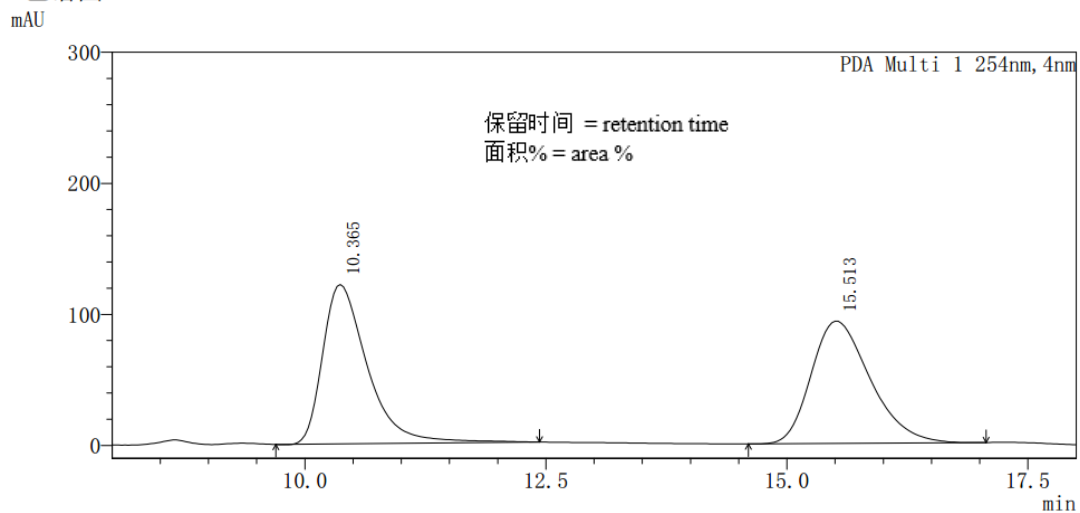

<峰表>

PDA Ch1 254nm

| 峰号 | 保留时间   | 面积      | 高度     | 化合物名 | 高度%     | 面积%     |
|----|--------|---------|--------|------|---------|---------|
| 1  | 10.365 | 3933267 | 121763 |      | 56.596  | 49.749  |
| 2  | 15.513 | 3972880 | 93381  |      | 43.404  | 50.251  |
| 总计 |        | 7906146 | 215144 |      | 100.000 | 100.000 |

<色谱图>

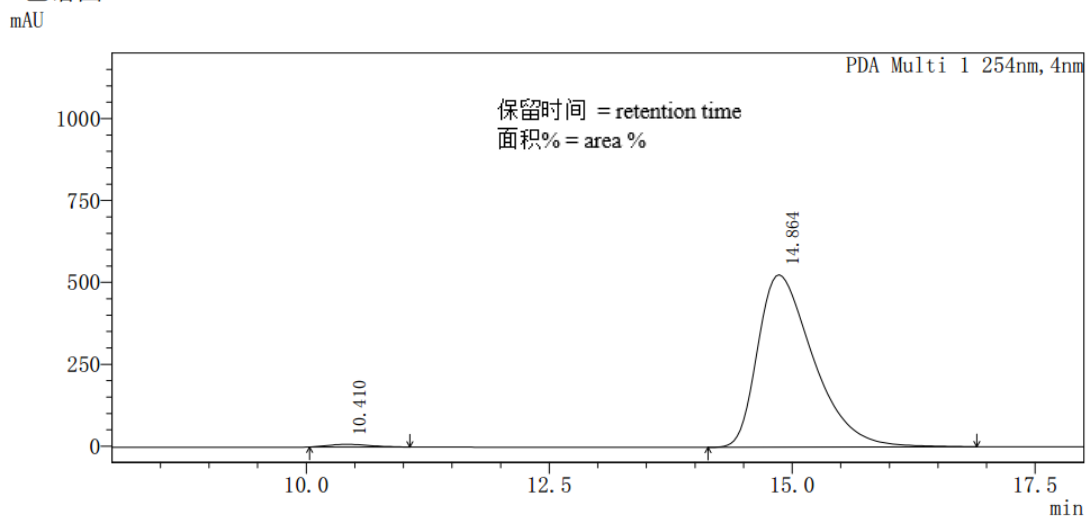

<峰表>

PDA Ch1 254nm

| 峰号 | 保留时间   | 面积       | 高度     | 化合物名 | 高度%     | 面积%     |
|----|--------|----------|--------|------|---------|---------|
| 1  | 10.410 | 240130   | 8323   |      | 1.557   | 1.130   |
| 2  | 14.864 | 21011195 | 526074 |      | 98.443  | 98.870  |
| 总计 |        | 21251325 | 534397 |      | 100.000 | 100.000 |

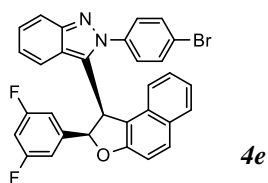

<色谱图>

mAU

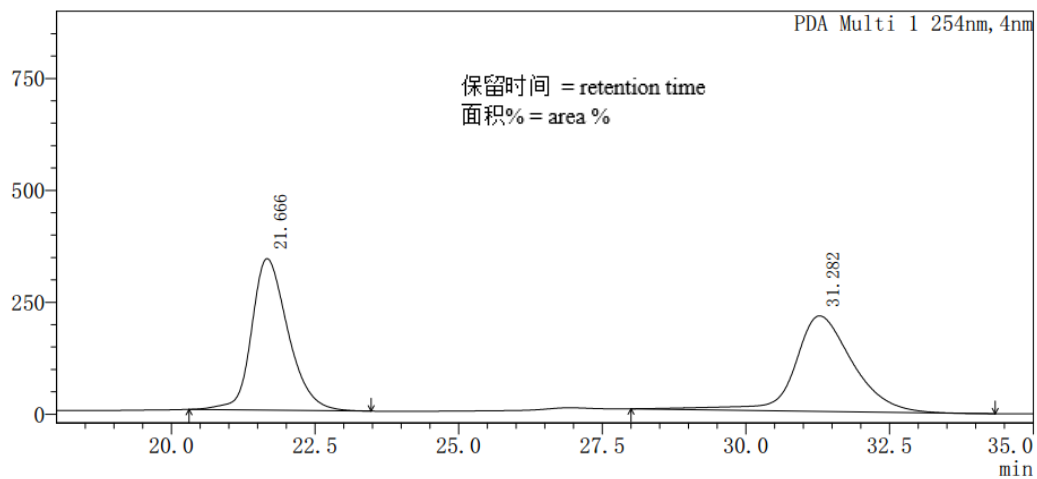

<峰表>

PDA Ch1 254nm

| 峰号 | 保留时间   | 面积       | 高度     | 化合物名 | 高度%     | 面积%     |
|----|--------|----------|--------|------|---------|---------|
| 1  | 21.666 | 14950081 | 338484 |      | 61.348  | 50.033  |
| 2  | 31.282 | 14930244 | 213263 |      | 38.652  | 49.967  |
| 总计 |        | 29880325 | 551747 |      | 100.000 | 100.000 |

<色谱图>

mAU

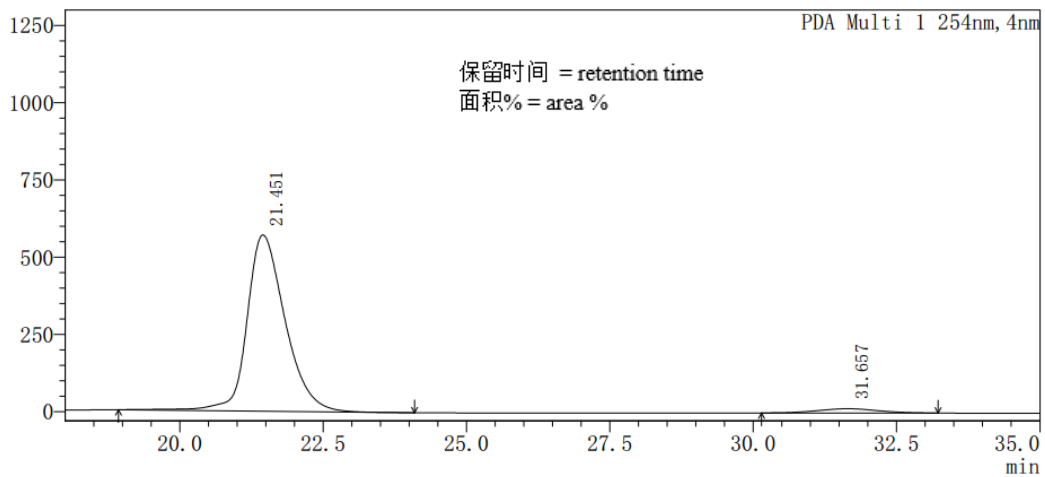

<峰表>

PDA Ch1 254nm

| 峰号 | 保留时间   | 面积       | 高度     | 化合物名 | 高度%     | 面积%     |
|----|--------|----------|--------|------|---------|---------|
| 1  | 21.451 | 26418935 | 570575 |      | 97.628  | 96.298  |
| 2  | 31.657 | 1015678  | 13861  |      | 2.372   | 3.702   |
| 总计 |        | 27434613 | 584436 |      | 100.000 | 100.000 |

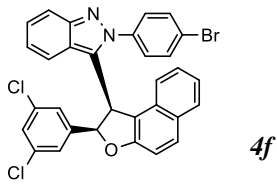

<色谱图>

mAU

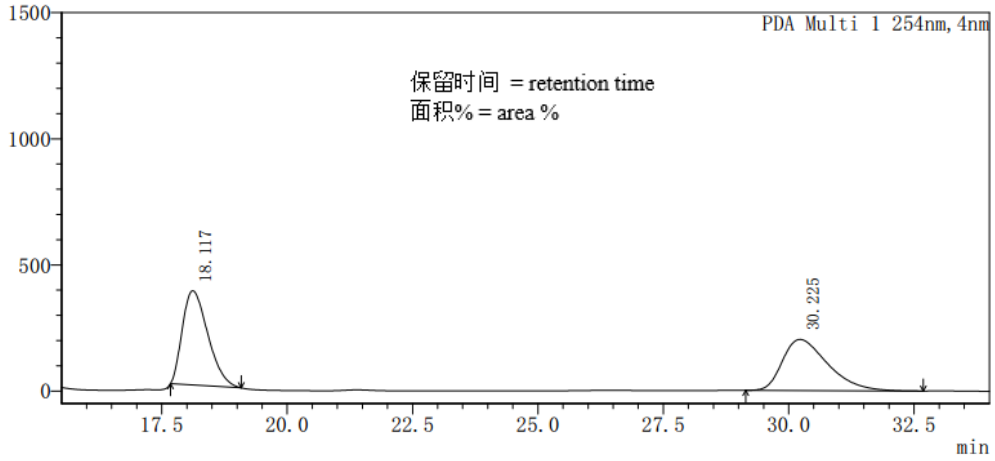

<峰表>

PDA Ch1 254nm

| 峰号 | 保留时间   | 面积       | 高度     | 化合物名 | 高度%     | 面积%     |
|----|--------|----------|--------|------|---------|---------|
| 1  | 18.117 | 13228608 | 373370 |      | 64.801  | 50.916  |
| 2  | 30.225 | 12752552 | 202807 |      | 35.199  | 49.084  |
| 总计 |        | 25981159 | 576177 |      | 100.000 | 100.000 |

<色谱图>

mAU

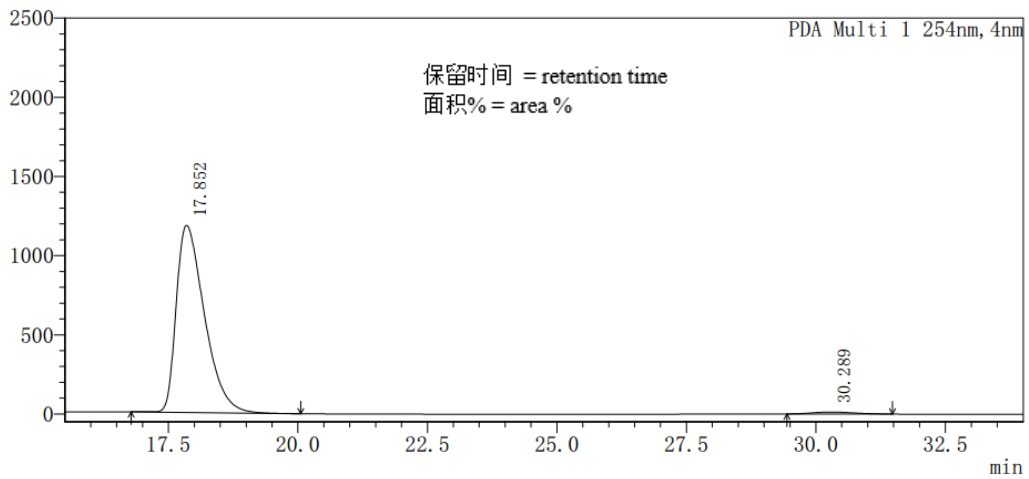

<峰表>

PDA Ch1 254nm

| 峰号 | 保留时间   | 面积       | 高度      | 化合物名 | 高度%     | 面积%     |
|----|--------|----------|---------|------|---------|---------|
| 1  | 17.852 | 44791209 | 1181162 |      | 98.965  | 98.461  |
| 2  | 30.289 | 700292   | 12349   |      | 1.035   | 1.539   |
| 总计 |        | 45491501 | 1193511 |      | 100.000 | 100.000 |

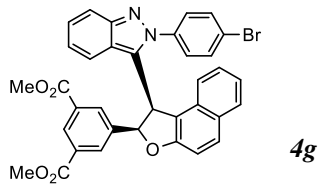

<色谱图>

mAU

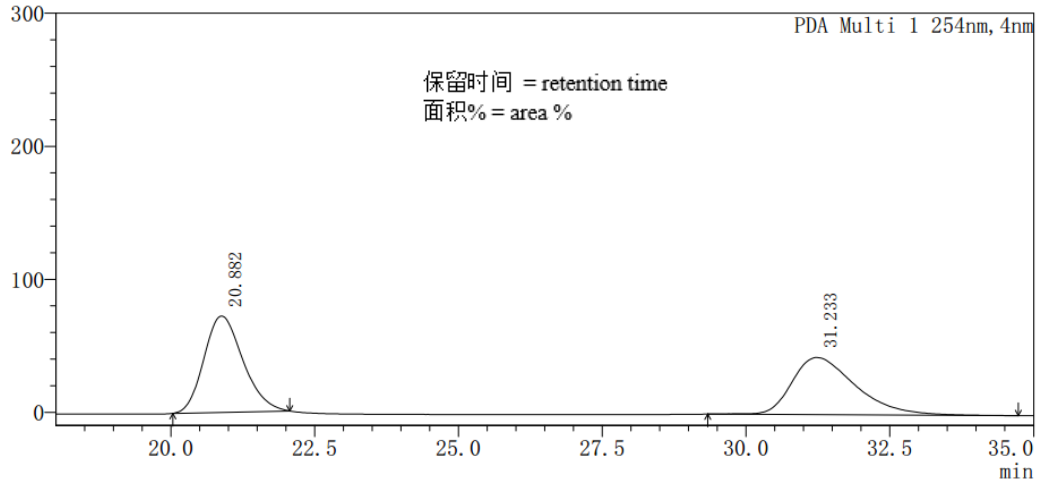

<峰表>

PDA Ch1 254nm

| 峰号 | 保留时间   | 面积      | 高度     | 化合物名 | 高度%     | 面积%     |
|----|--------|---------|--------|------|---------|---------|
| 1  | 20.882 | 3423346 | 72379  |      | 62.729  | 50.926  |
| 2  | 31.233 | 3298851 | 43004  |      | 37.271  | 49.074  |
| 总计 |        | 6722197 | 115382 |      | 100.000 | 100.000 |

<色谱图>

mAU

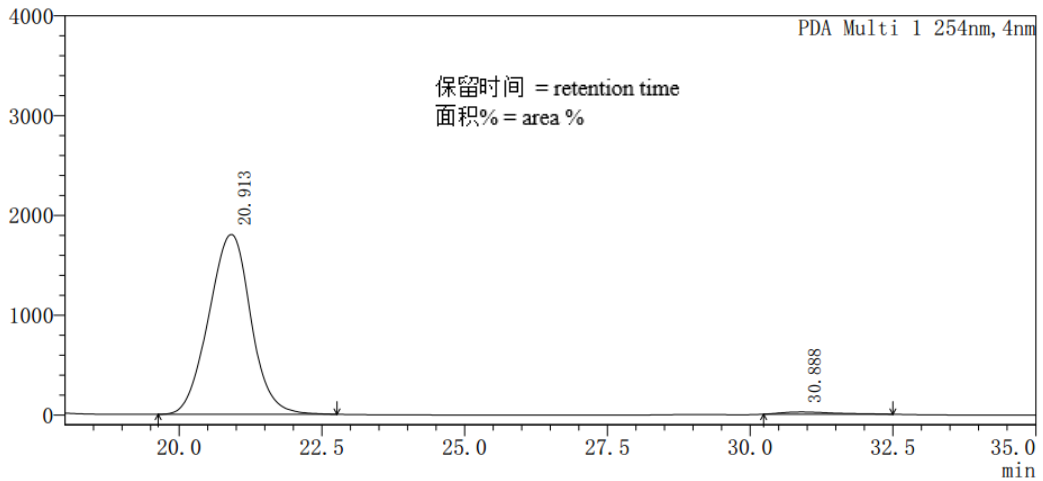

<峰表>

PDA Ch1 254nm

| 峰号 | 保留时间   | 面积       | 高度      | 化合物名 | 高度%     | 面积%     |
|----|--------|----------|---------|------|---------|---------|
| 1  | 20.913 | 92555142 | 1802431 |      | 98.772  | 98.430  |
| 2  | 30.888 | 1476134  | 22407   |      | 1.228   | 1.570   |
| 总计 |        | 94031276 | 1824838 |      | 100.000 | 100.000 |



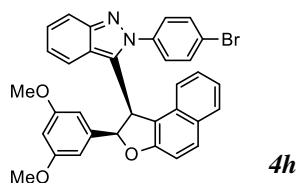

<色谱图>

mAU

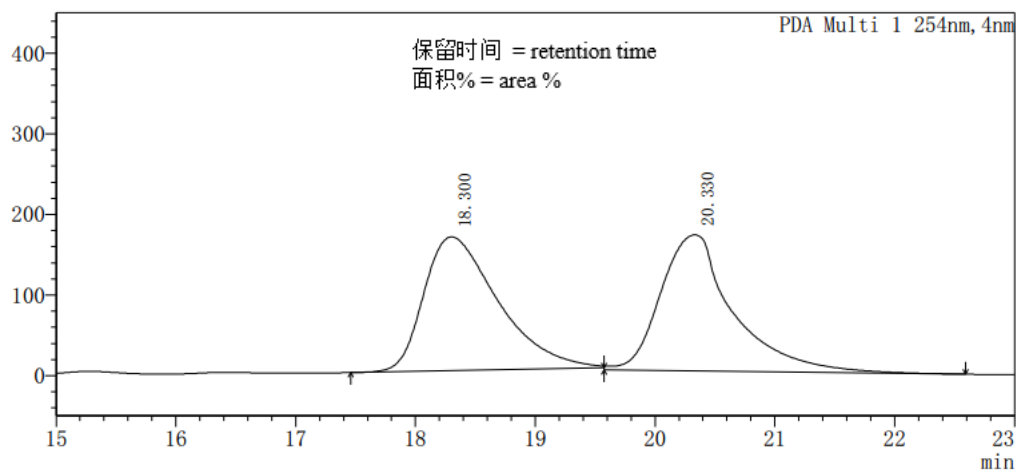

<峰表>

PDA Ch1 254nm

| 峰号 | 保留时间   | 面积       | 高度     | 化合物名 | 高度%     | 面积%     |
|----|--------|----------|--------|------|---------|---------|
| 1  | 18.300 | 7136968  | 165786 |      | 49.574  | 50.121  |
| 2  | 20.330 | 7102574  | 168633 |      | 50.426  | 49.879  |
| 总计 |        | 14239542 | 334419 |      | 100.000 | 100.000 |

<色谱图>

mAU

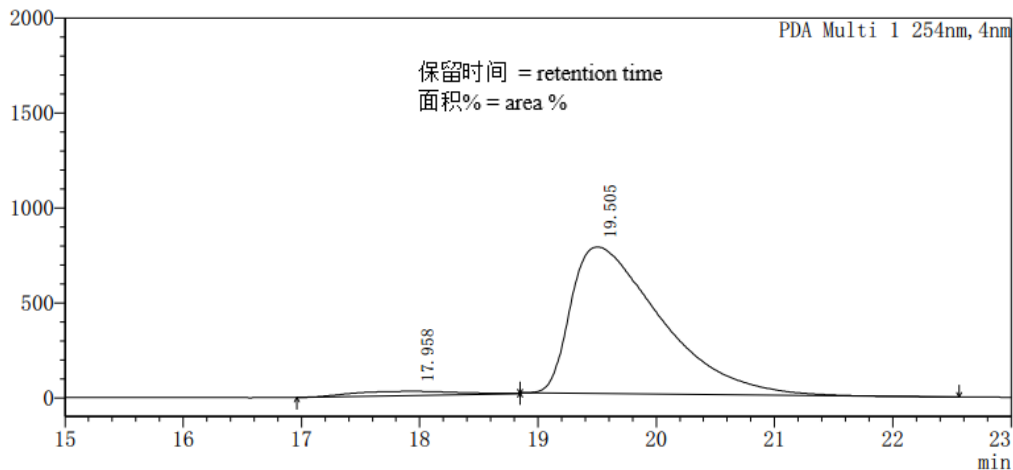

<峰表>

PDA Ch1 254nm

| 峰号 | 保留时间   | 面积       | 高度     | 化合物名 | 高度%     | 面积%     |
|----|--------|----------|--------|------|---------|---------|
| 1  | 17.958 | 1570269  | 22901  |      | 2.876   | 3.682   |
| 2  | 19.505 | 41077592 | 773442 |      | 97.124  | 96.318  |
| 总计 |        | 42647862 | 796343 |      | 100.000 | 100.000 |

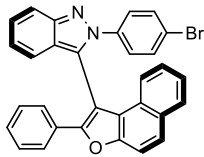

5a

<色谱图>

mAU

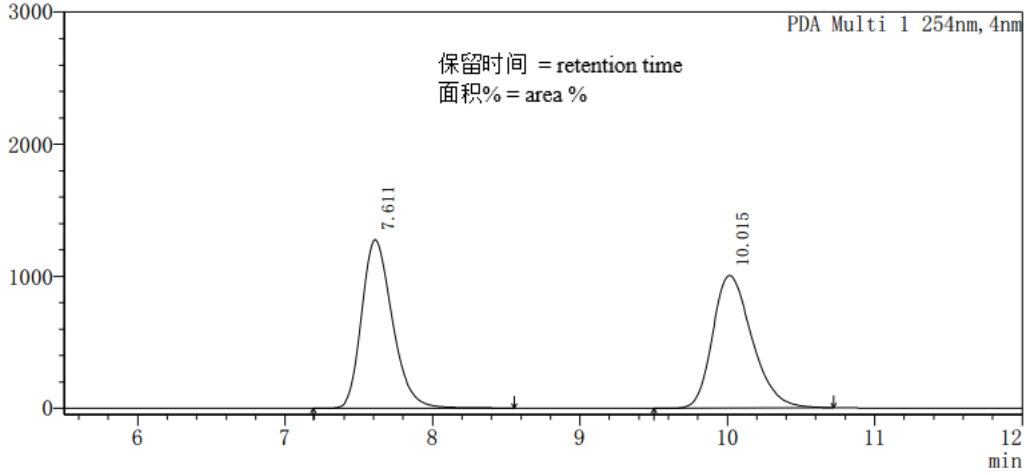

<峰表>

PDA Ch1 254nm

| 峰号 | 保留时间   | 面积       | 高度      | 化合物名 | 高度%     | 面积%     |
|----|--------|----------|---------|------|---------|---------|
| 1  | 7.611  | 18515879 | 1276885 |      | 55.972  | 49.876  |
| 2  | 10.015 | 18607943 | 1004420 |      | 44.028  | 50.124  |
| 总计 |        | 37123822 | 2281305 |      | 100.000 | 100.000 |

<色谱图>

mAU

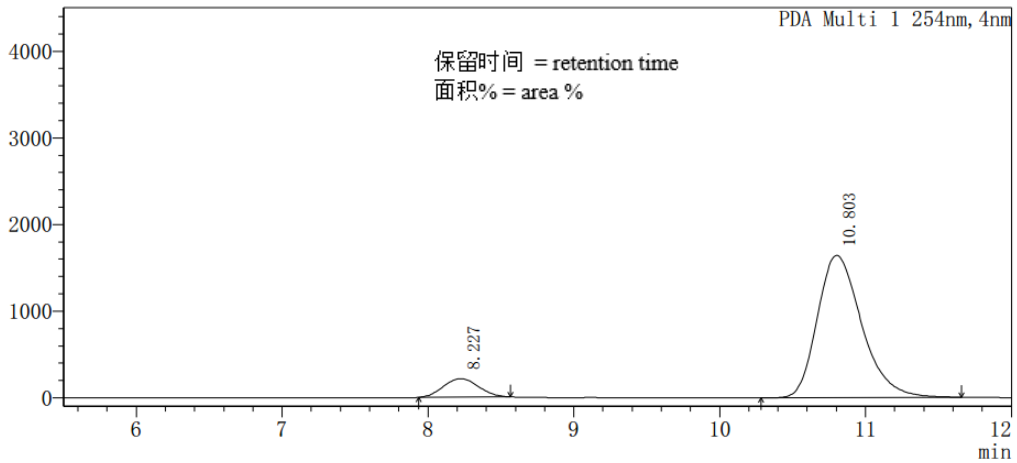

<峰表>

PDA Ch1 254nm

| 峰号 | 保留时间   | 面积       | 高度      | 化合物名 | 高度%     | 面积%     |
|----|--------|----------|---------|------|---------|---------|
| 1  | 8.227  | 3579529  | 212975  |      | 11.484  | 9.357   |
| 2  | 10.803 | 34676341 | 1641529 |      | 88.516  | 90.643  |
| 总计 |        | 38255871 | 1854504 |      | 100.000 | 100.000 |

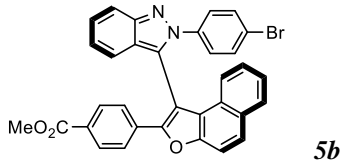

<色谱图>

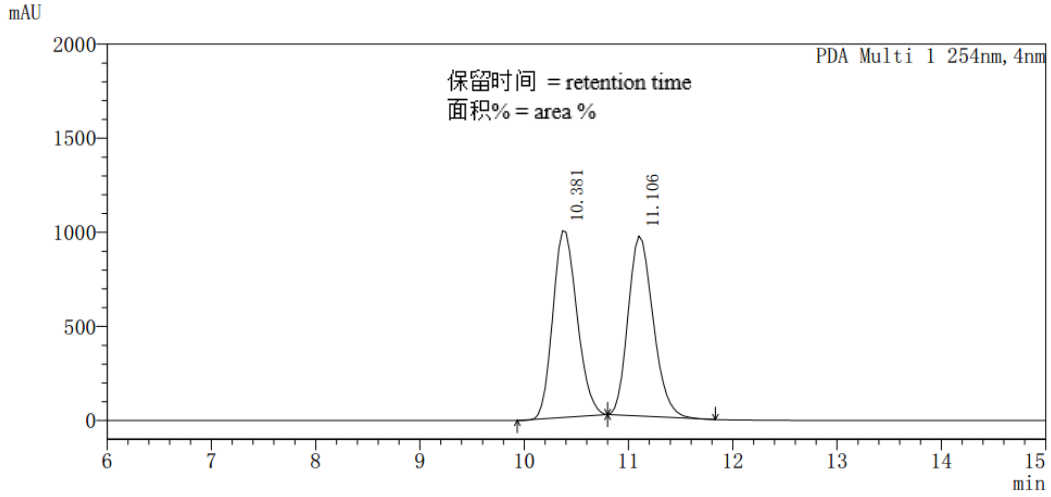

<峰表>

PDA Ch1 254nm

| 峰号 | 保留时间   | 面积       | 高度      | 化合物名 | 高度%     | 面积%     |
|----|--------|----------|---------|------|---------|---------|
| 1  | 10.381 | 16047241 | 992676  |      | 50.907  | 50.098  |
| 2  | 11.106 | 15984535 | 957311  |      | 49.093  | 49.902  |
| 总计 |        | 32031776 | 1949987 |      | 100.000 | 100.000 |

<色谱图>

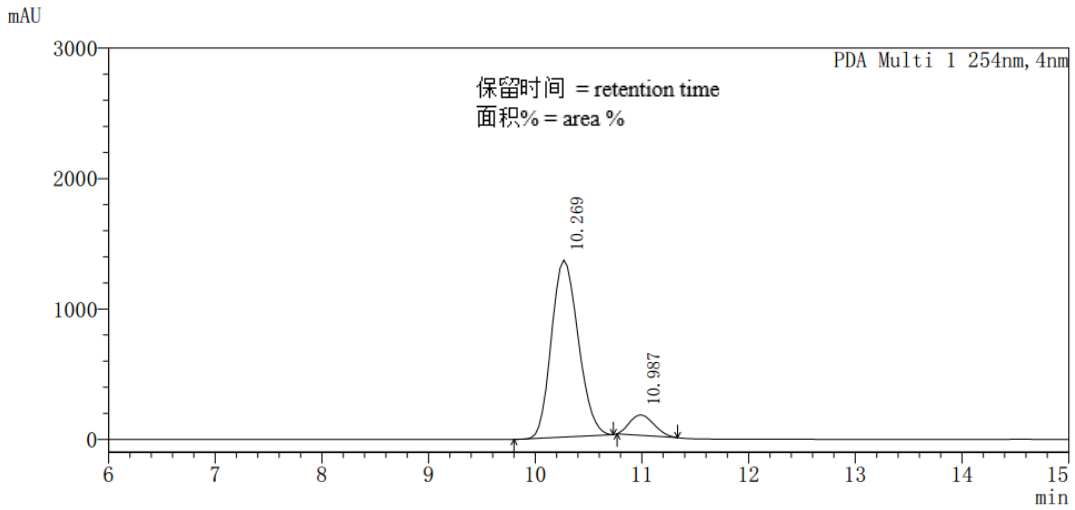

<峰表>

PDA Ch1 254nm

| 峰号 | 保留时间   | 面积       | 高度      | 化合物名 | 高度%     | 面积%     |
|----|--------|----------|---------|------|---------|---------|
| 1  | 10.269 | 23685629 | 1357457 |      | 89.666  | 90.558  |
| 2  | 10.987 | 2469682  | 156454  |      | 10.334  | 9.442   |
| 总计 |        | 26155311 | 1513911 |      | 100.000 | 100.000 |

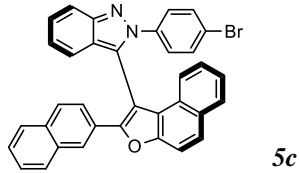

<色谱图>

mAU

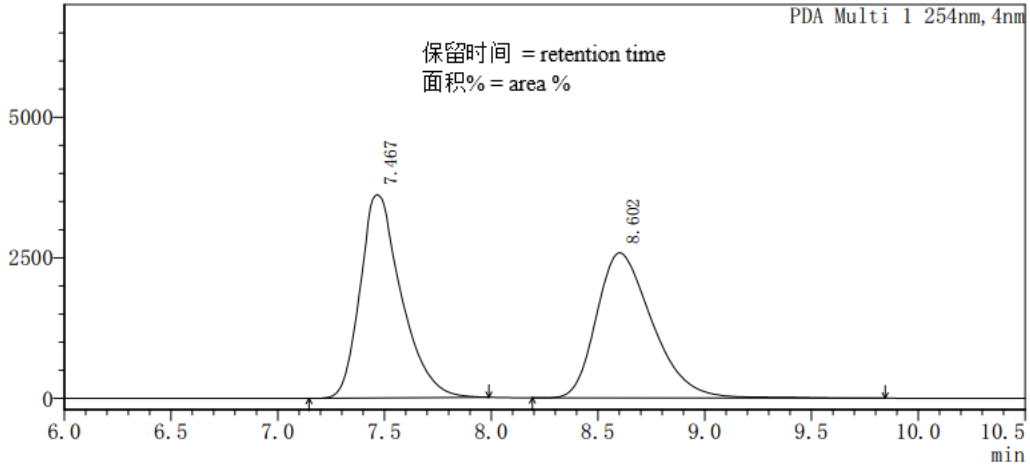

<峰表>

PDA Ch1 254nm

| 峰号 | 保留时间  | 面积       | 高度      | 化合物名 | 高度%     | 面积%     |
|----|-------|----------|---------|------|---------|---------|
| 1  | 7.467 | 48445377 | 3615229 |      | 58.361  | 50.752  |
| 2  | 8.602 | 47010325 | 2579389 |      | 41.639  | 49.248  |
| 总计 |       | 95455701 | 6194618 |      | 100.000 | 100.000 |

<色谱图>

mAU

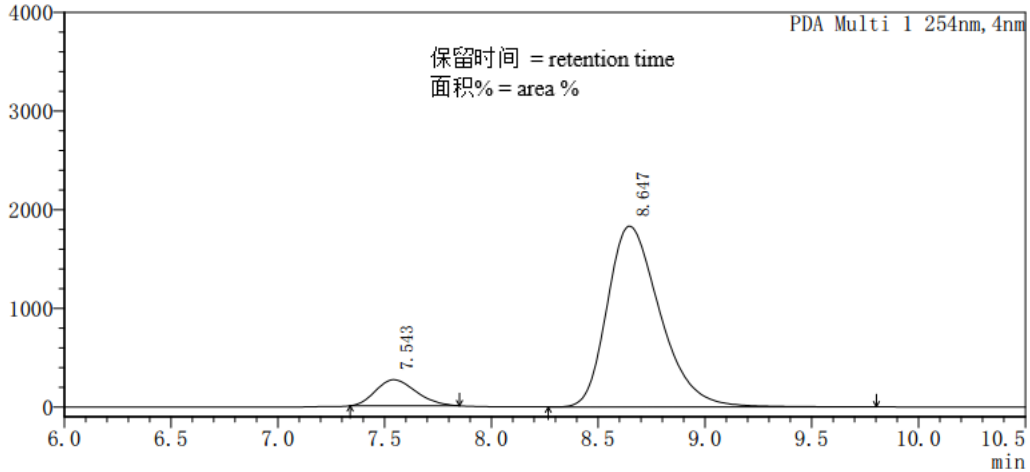

<峰表>

PDA Ch1 254nm

| 峰号 | 保留时间  | 面积       | 高度      | 化合物名 | 高度%     | 面积%     |
|----|-------|----------|---------|------|---------|---------|
| 1  | 7.543 | 3484751  | 265274  |      | 12.634  | 9.921   |
| 2  | 8.647 | 31639172 | 1834483 |      | 87.366  | 90.079  |
| 总计 |       | 35123923 | 2099757 |      | 100.000 | 100.000 |

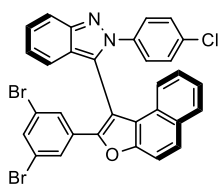

5d

<色谱图>

mAU

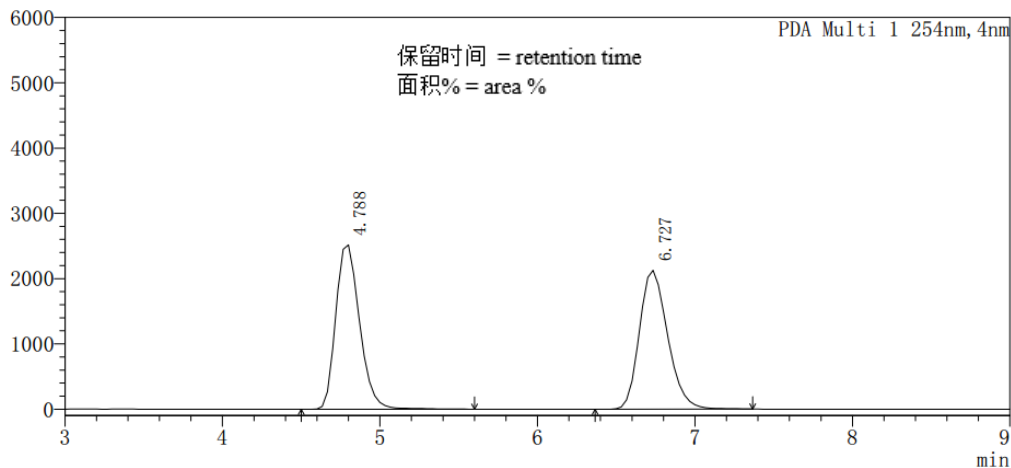

<峰表>

PDA Ch1 254nm

| 峰号 | 保留时间  | 面积       | 高度      | 化合物名 | 高度%     | 面积%     |
|----|-------|----------|---------|------|---------|---------|
| 1  | 4.788 | 26481087 | 2517354 |      | 54.218  | 49.931  |
| 2  | 6.727 | 26554014 | 2125651 |      | 45.782  | 50.069  |
| 总计 |       | 53035101 | 4643005 |      | 100.000 | 100.000 |

<色谱图>

mAU

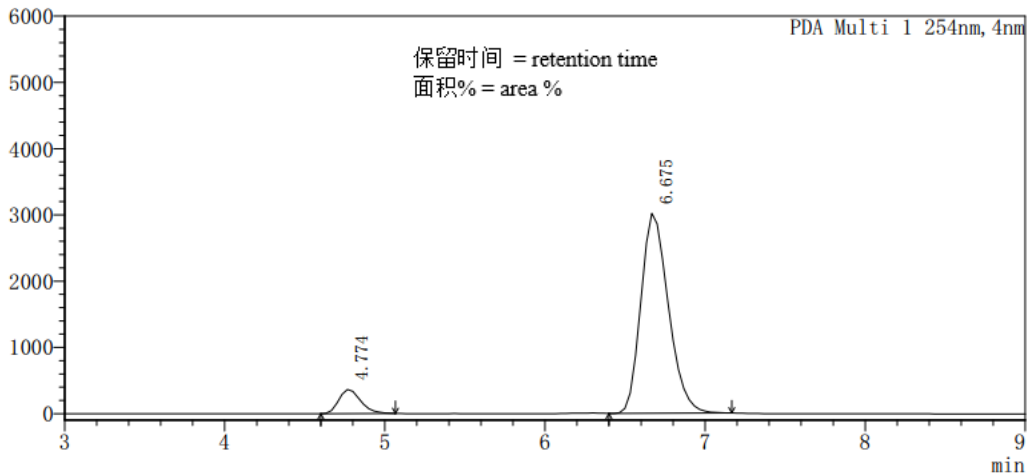

<峰表>

PDA Ch1 254nm

| 峰号 | 保留时间  | 面积       | 高度      | 化合物名 | 高度%     | 面积%     |
|----|-------|----------|---------|------|---------|---------|
| 1  | 4.774 | 3462117  | 365354  |      | 10.801  | 8.761   |
| 2  | 6.675 | 36054457 | 3017248 |      | 89.199  | 91.239  |
| 总计 |       | 39516573 | 3382602 |      | 100.000 | 100.000 |

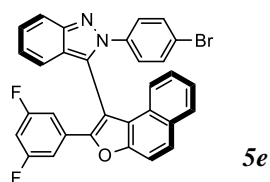

<色谱图>

mAU

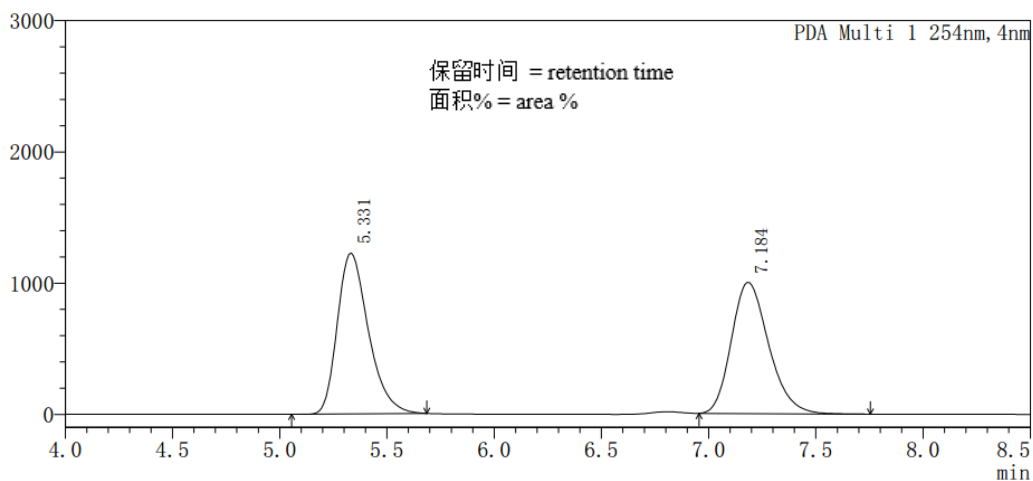

<峰表>

PDA Ch1 254nm

| 峰号 | 保留时间  | 面积       | 高度      | 化合物名 | 高度%     | 面积%     |
|----|-------|----------|---------|------|---------|---------|
| 1  | 5.331 | 12336824 | 1226888 |      | 55.126  | 50.486  |
| 2  | 7.184 | 12099544 | 998716  |      | 44.874  | 49.514  |
| 总计 |       | 24436367 | 2225604 |      | 100.000 | 100.000 |

<色谱图>

mAU

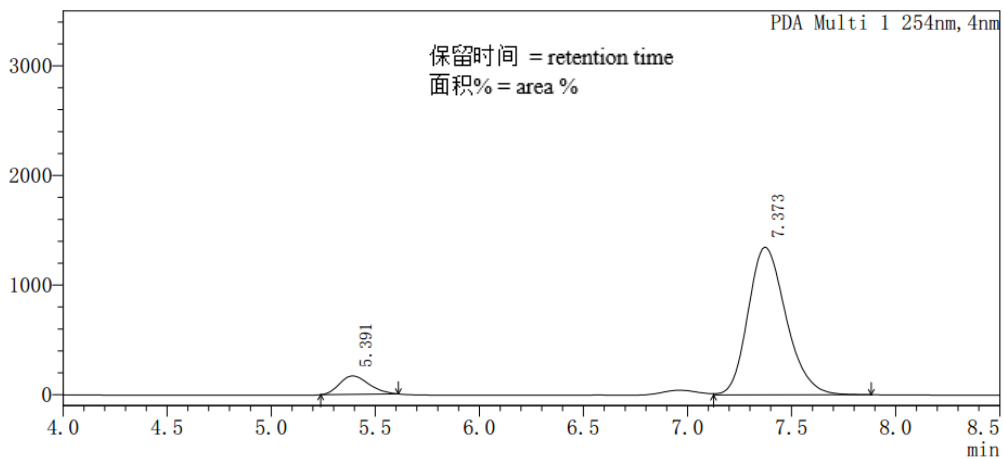

<峰表>

PDA Ch1 254nm

| 峰号 | 保留时间  | 面积       | 高度      | 化合物名 | 高度%     | 面积%     |
|----|-------|----------|---------|------|---------|---------|
| 1  | 5.391 | 1665261  | 168978  |      | 11.141  | 8.878   |
| 2  | 7.373 | 17091542 | 1347709 |      | 88.859  | 91.122  |
| 总计 |       | 18756802 | 1516687 |      | 100.000 | 100.000 |

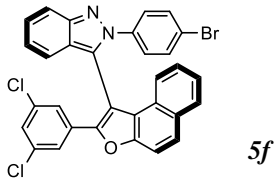

<色谱图>

mAU

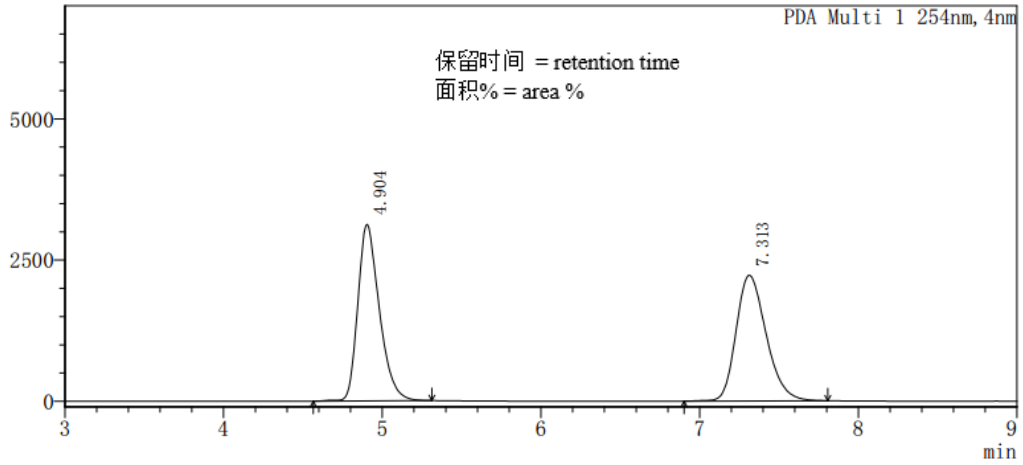

<峰表>

PDA Ch1 254nm

| 峰号 | 保留时间  | 面积       | 高度      | 化合物名 | 高度%     | 面积%     |
|----|-------|----------|---------|------|---------|---------|
| 1  | 4.904 | 29483994 | 3126687 |      | 58.422  | 50.116  |
| 2  | 7.313 | 29347914 | 2225231 |      | 41.578  | 49.884  |
| 总计 |       | 58831908 | 5351919 |      | 100.000 | 100.000 |

<色谱图>

mAU

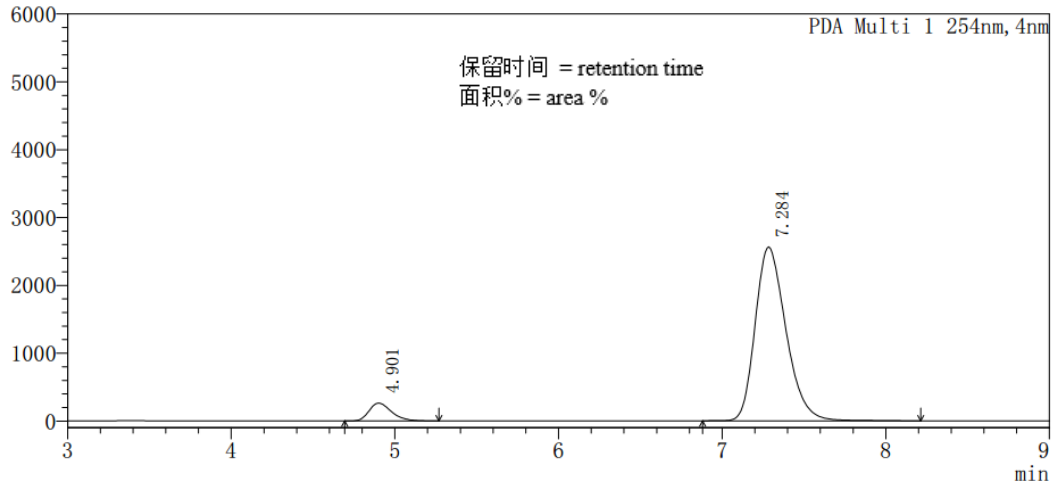

<峰表>

PDA Ch1 254nm

| 峰号 | 保留时间  | 面积       | 高度      | 化合物名 | 高度%     | 面积%     |
|----|-------|----------|---------|------|---------|---------|
| 1  | 4.901 | 2500654  | 262525  |      | 9.283   | 6.940   |
| 2  | 7.284 | 33533654 | 2565514 |      | 90.717  | 93.060  |
| 总计 |       | 36034308 | 2828039 |      | 100.000 | 100.000 |

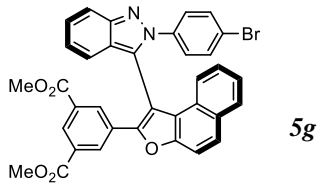

<色谱图>

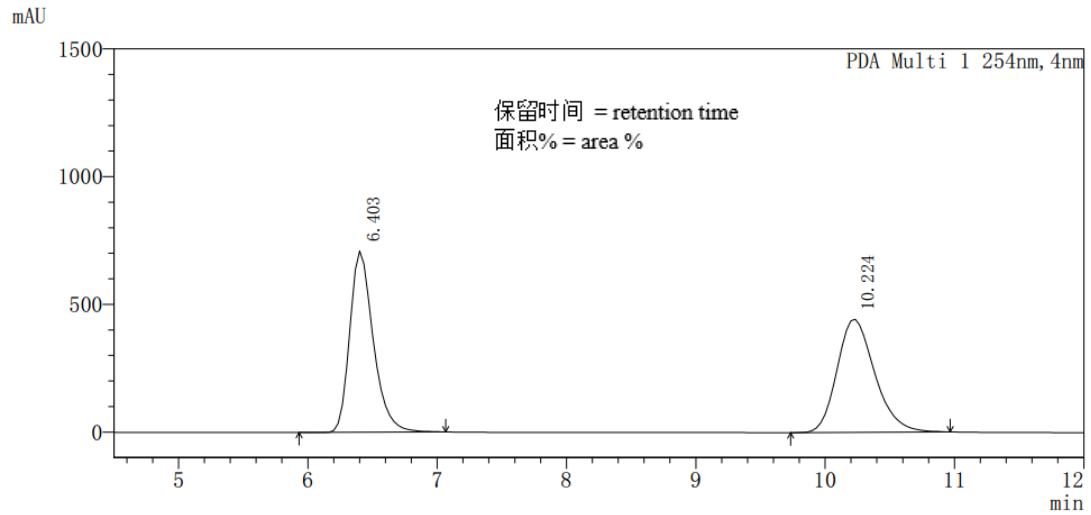

<峰表>

| 峰号 | 保留时间   | 面积       | 高度      | 化合物名 | 高度%     | 面积%     |
|----|--------|----------|---------|------|---------|---------|
| 1  | 6.403  | 8974598  | 709167  |      | 61.549  | 49.993  |
| 2  | 10.224 | 8977140  | 443031  |      | 38.451  | 50.007  |
| 总计 |        | 17951737 | 1152197 |      | 100.000 | 100.000 |

<色谱图>

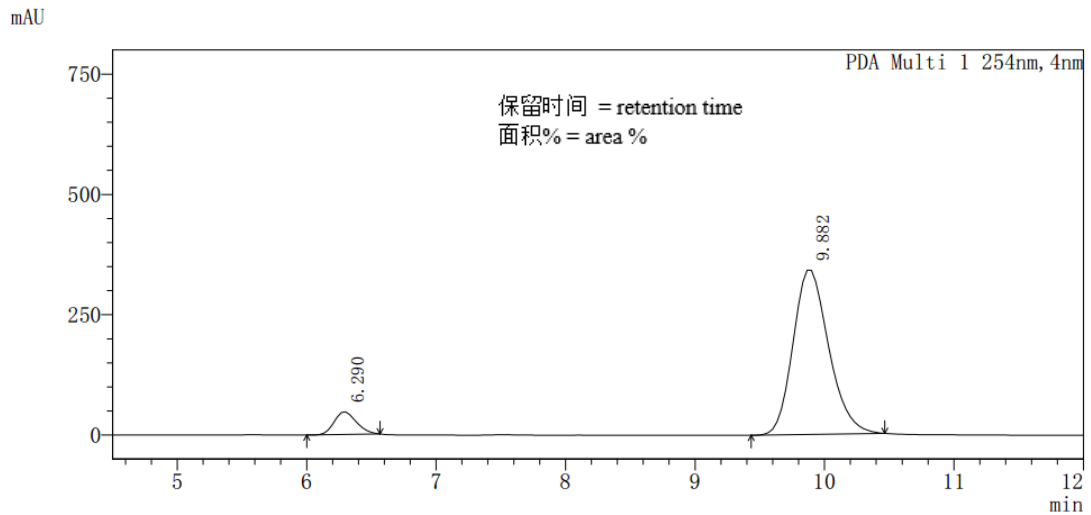

<峰表>

| 峰号 | 保留时间  | 面积      | 高度     | 化合物名 | 高度%     | 面积%     |
|----|-------|---------|--------|------|---------|---------|
| 1  | 6.290 | 566092  | 47206  |      | 12.139  | 7.927   |
| 2  | 9.882 | 6575143 | 341676 |      | 87.861  | 92.073  |
| 总计 |       | 7141235 | 388882 |      | 100.000 | 100.000 |



**HPLC data of 5g after recrystallization.**

<色谱图>

mAU

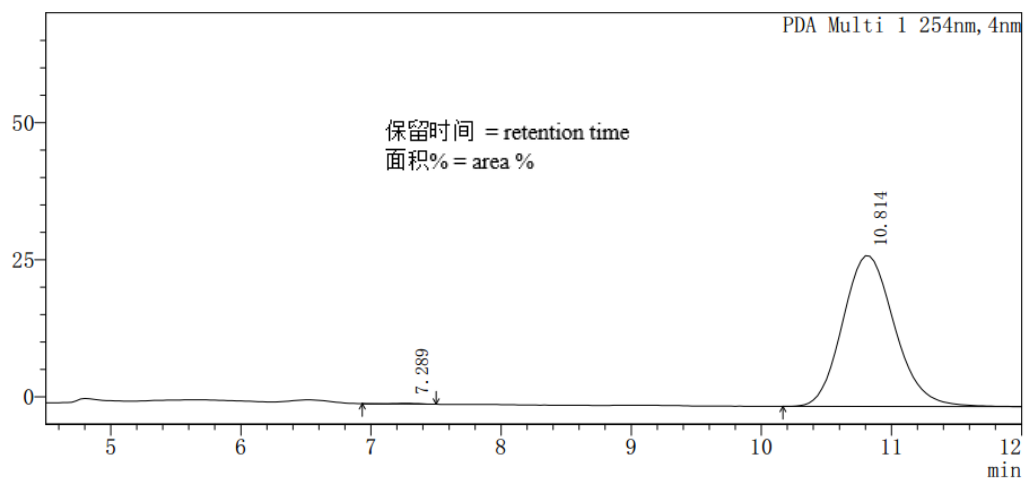

<峰表>

PDA Ch1 254nm

| 峰号 | 保留时间   | 面积     | 高度    | 化合物名 | 高度%     | 面积%     |
|----|--------|--------|-------|------|---------|---------|
| 1  | 7.289  | 1400   | 135   |      | 0.490   | 0.183   |
| 2  | 10.814 | 764385 | 27483 |      | 99.510  | 99.817  |
| 总计 |        | 765785 | 27618 |      | 100.000 | 100.000 |

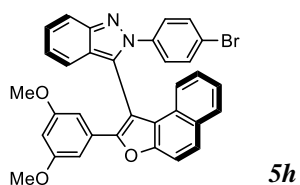

<色谱图>

mAU

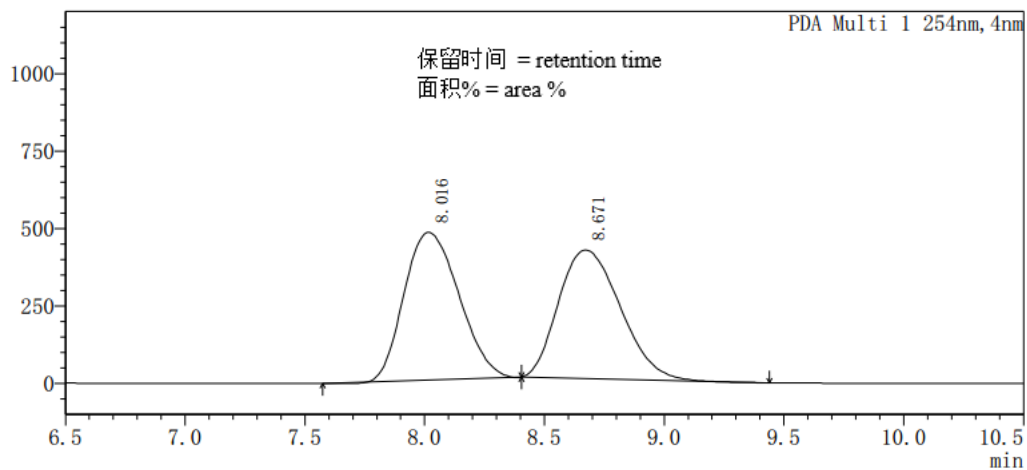

<峰表>

PDA Ch1 254nm

| 峰号 | 保留时间  | 面积       | 高度     | 化合物名 | 高度%     | 面积%     |
|----|-------|----------|--------|------|---------|---------|
| 1  | 8.016 | 7568666  | 475511 |      | 53.440  | 50.436  |
| 2  | 8.671 | 7437942  | 414291 |      | 46.560  | 49.564  |
| 总计 |       | 15006609 | 889802 |      | 100.000 | 100.000 |

<色谱图>

mAU

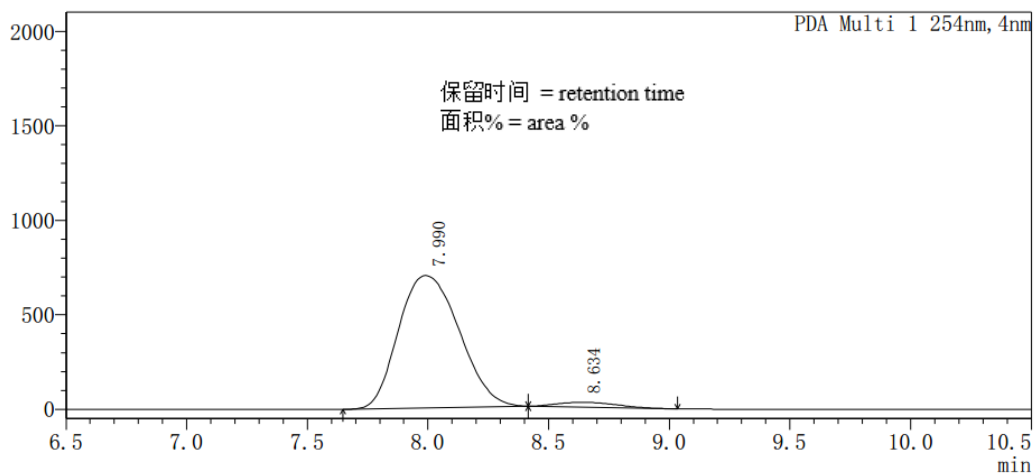

<峰表>

PDA Ch1 254nm

| 峰号 | 保留时间  | 面积       | 高度     | 化合物名 | 高度%     | 面积%     |
|----|-------|----------|--------|------|---------|---------|
| 1  | 7.990 | 12271329 | 700664 |      | 96.527  | 96.600  |
| 2  | 8.634 | 431944   | 25207  |      | 3.473   | 3.400   |
| 总计 |       | 12703273 | 725871 |      | 100.000 | 100.000 |

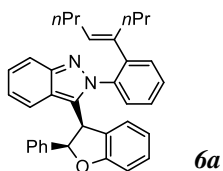

<色谱图>

mAU

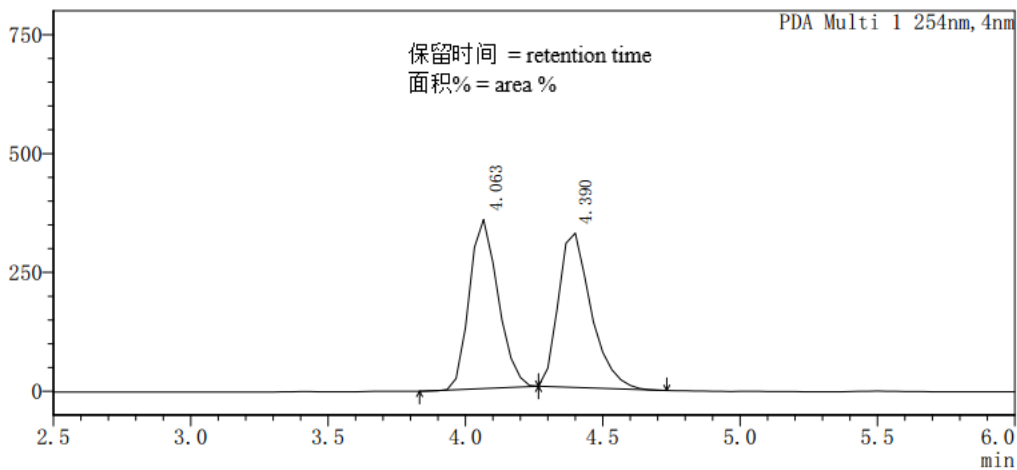

<峰表>

PDA Ch1 254nm

| 峰号 | 保留时间  | 面积      | 高度     | 化合物名 | 高度%     | 面积%     |
|----|-------|---------|--------|------|---------|---------|
| 1  | 4.063 | 2605209 | 355518 |      | 52.296  | 49.217  |
| 2  | 4.390 | 2688077 | 324296 |      | 47.704  | 50.783  |
| 总计 |       | 5293286 | 679814 |      | 100.000 | 100.000 |

<色谱图>

mAU

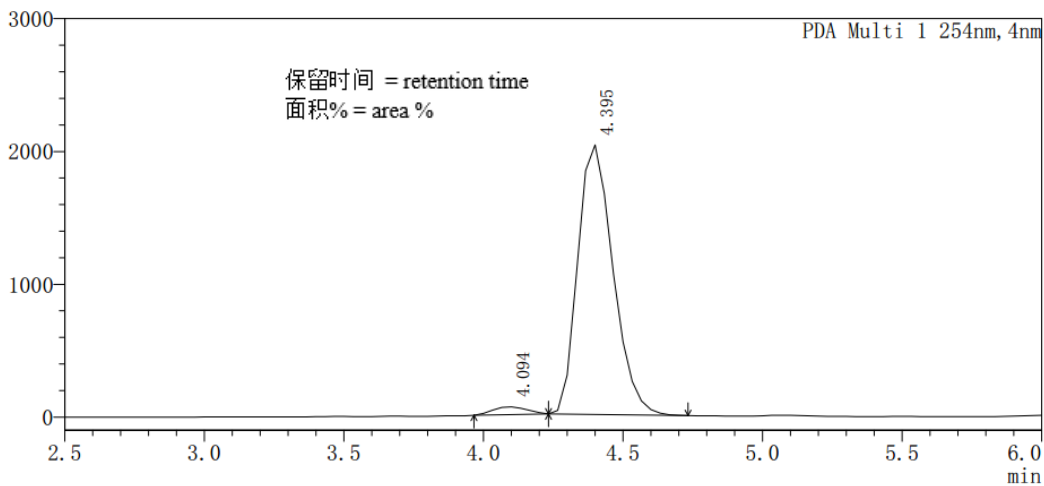

<峰表>

PDA Ch1 254nm

| 峰号 | 保留时间  | 面积       | 高度      | 化合物名 | 高度%     | 面积%     |
|----|-------|----------|---------|------|---------|---------|
| 1  | 4.094 | 519331   | 58540   |      | 2.801   | 2.823   |
| 2  | 4.395 | 17877290 | 2031279 |      | 97.199  | 97.177  |
| 总计 |       | 18396621 | 2089819 |      | 100.000 | 100.000 |

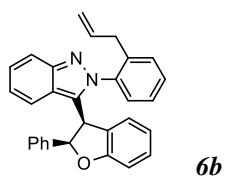

<色谱图>

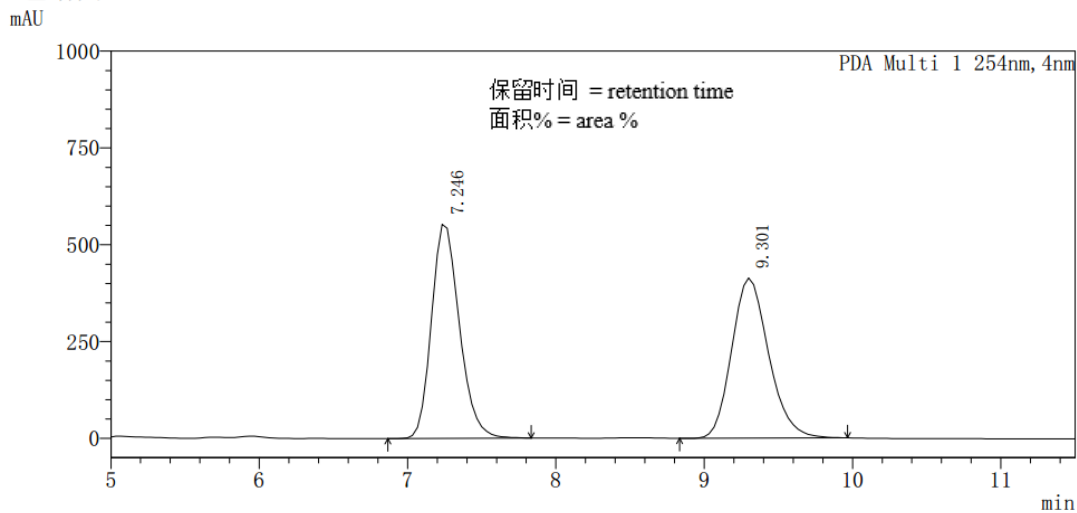

<峰表>

PDA Ch1 254nm

| 峰号 | 保留时间  | 面积       | 高度     | 化合物名 | 高度%     | 面积%     |
|----|-------|----------|--------|------|---------|---------|
| 1  | 7.246 | 7238292  | 552985 |      | 57.208  | 50.314  |
| 2  | 9.301 | 7147866  | 413637 |      | 42.792  | 49.686  |
| 总计 |       | 14386158 | 966622 |      | 100.000 | 100.000 |

<色谱图>

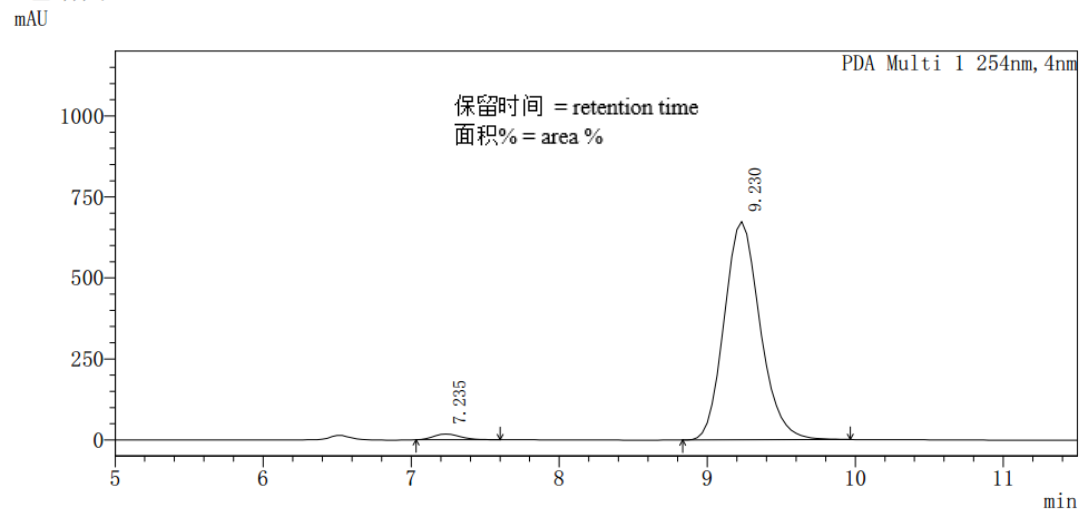

<峰表>

PDA Ch1 254nm

| 峰号 | 保留时间  | 面积       | 高度     | 化合物名 | 高度%     | 面积%     |
|----|-------|----------|--------|------|---------|---------|
| 1  | 7.235 | 225717   | 17817  |      | 2.576   | 1.948   |
| 2  | 9.230 | 11358755 | 673950 |      | 97.424  | 98.052  |
| 总计 |       | 11584472 | 691767 |      | 100.000 | 100.000 |

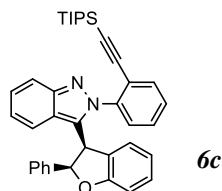

<色谱图>

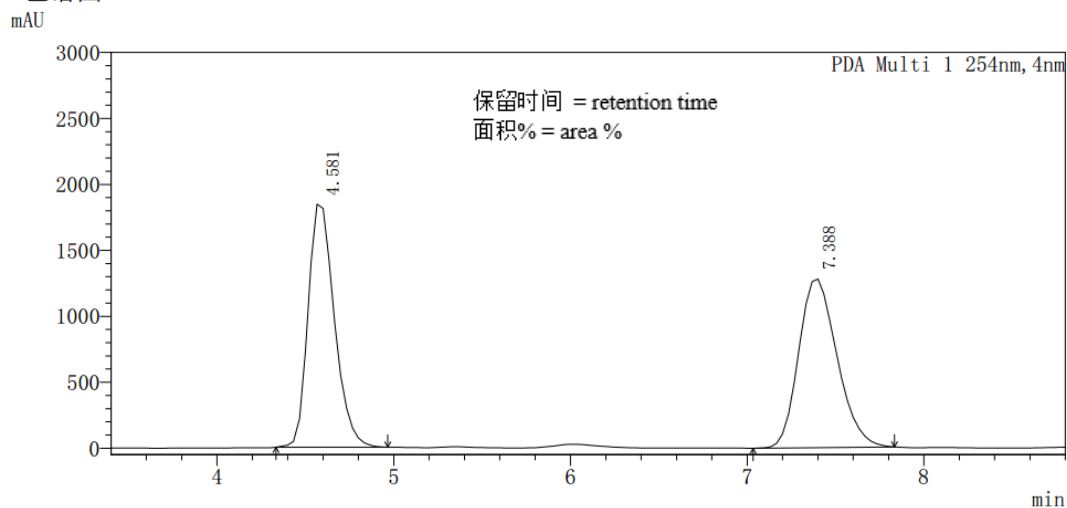

<峰表>

| 峰号 | 保留时间  | 面积       | 高度      | 化合物名 | 高度%     | 面积%     |
|----|-------|----------|---------|------|---------|---------|
| 1  | 4.581 | 19106157 | 1843108 |      | 59.039  | 49.737  |
| 2  | 7.388 | 19308460 | 1278740 |      | 40.961  | 50.263  |
| 总计 |       | 38414617 | 3121848 |      | 100.000 | 100.000 |

<色谱图>

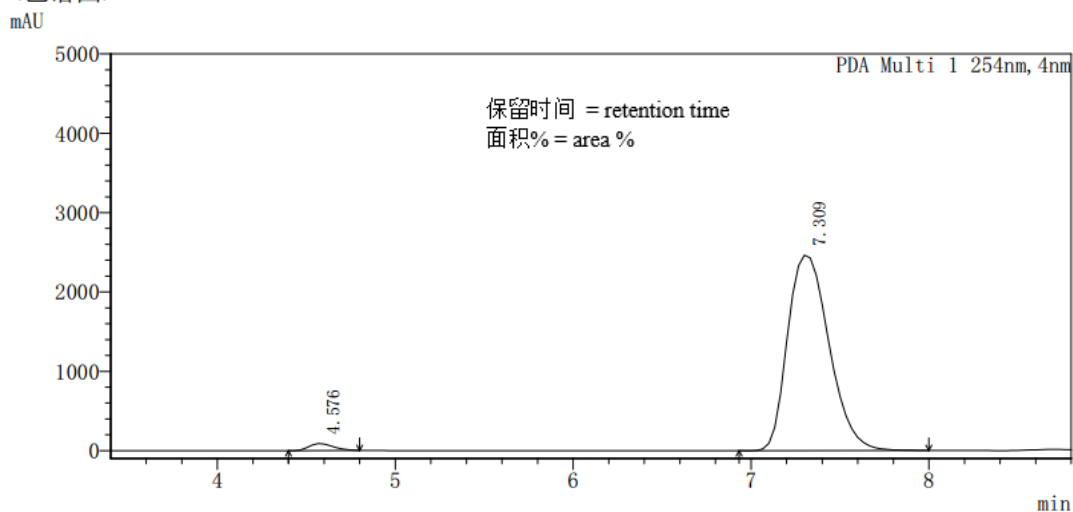

<峰表>

| 峰号 | 保留时间  | 面积       | 高度      | 化合物名 | 高度%     | 面积%     |
|----|-------|----------|---------|------|---------|---------|
| 1  | 4.576 | 836811   | 88194   |      | 3.451   | 2.049   |
| 2  | 7.309 | 40000534 | 2467435 |      | 96.549  | 97.951  |
| 总计 |       | 40837345 | 2555628 |      | 100.000 | 100.000 |

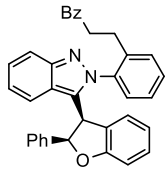

6d

<色谱图>

mAU

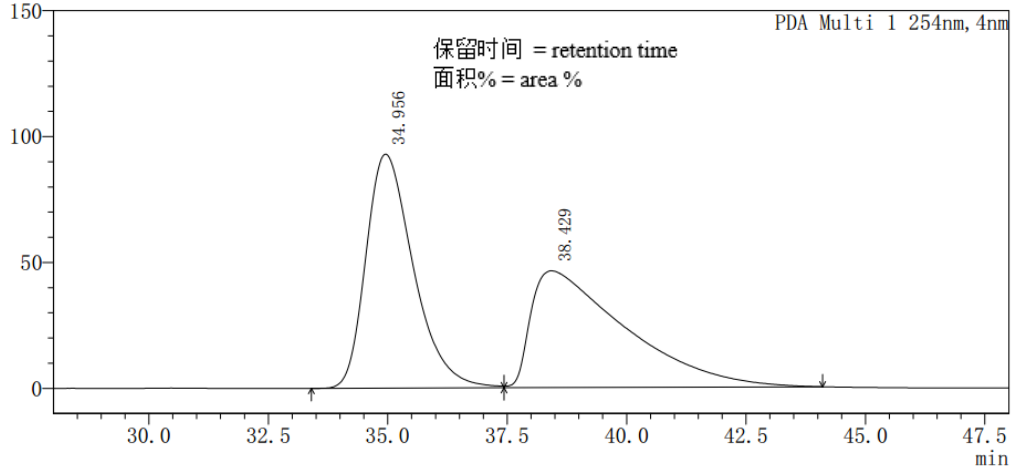

<峰表>

PDA Ch1 254nm

| 峰号 | 保留时间   | 面积       | 高度     | 化合物名 | 高度%     | 面积%     |
|----|--------|----------|--------|------|---------|---------|
| 1  | 34.956 | 6439642  | 92992  |      | 66.706  | 50.222  |
| 2  | 38.429 | 6382682  | 46414  |      | 33.294  | 49.778  |
| 总计 |        | 12822324 | 139405 |      | 100.000 | 100.000 |

<色谱图>

mAU

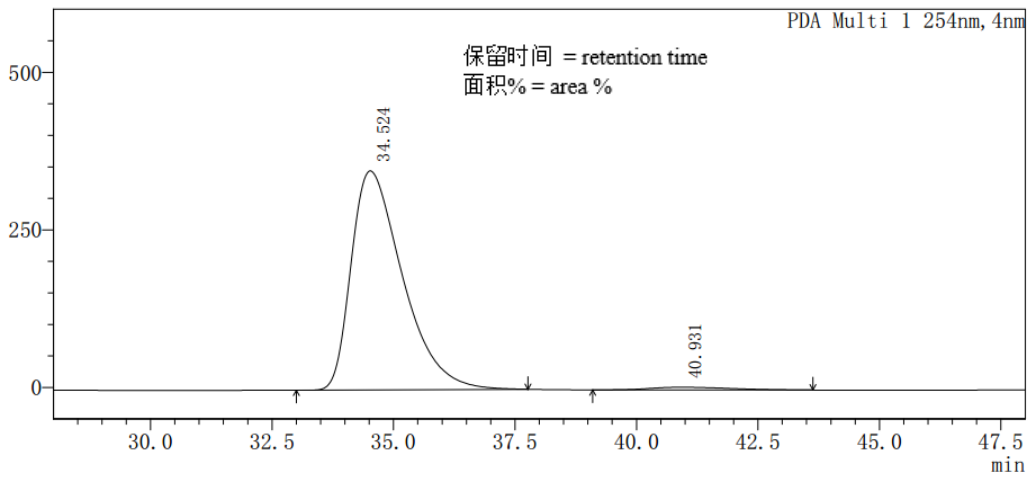

<峰表>

PDA Ch1 254nm

| 峰号 | 保留时间   | 面积       | 高度     | 化合物名 | 高度%     | 面积%     |
|----|--------|----------|--------|------|---------|---------|
| 1  | 34.524 | 25614317 | 347604 |      | 98.776  | 98.103  |
| 2  | 40.931 | 495284   | 4306   |      | 1.224   | 1.897   |
| 总计 |        | 26109600 | 351910 |      | 100.000 | 100.000 |

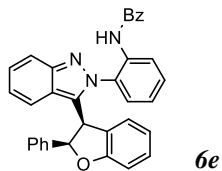

<色谱图>

mAU

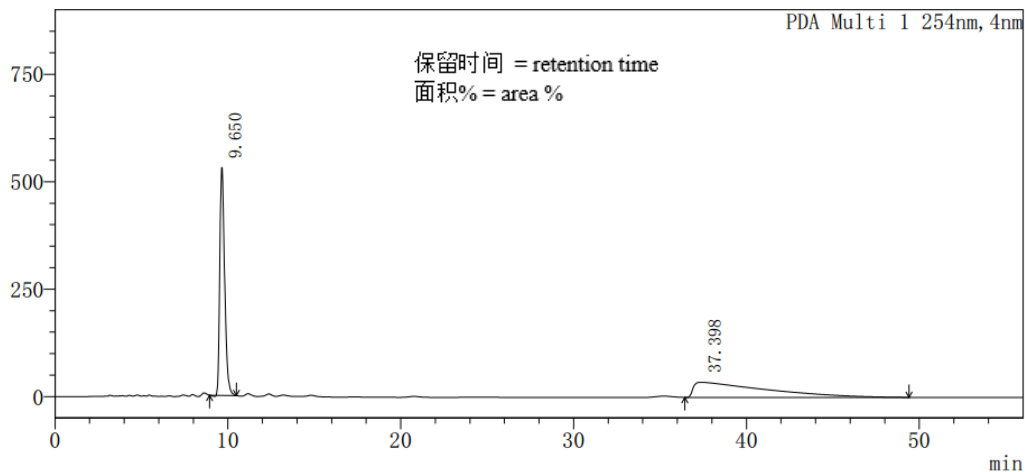

<峰表>

PDA Ch1 254nm

| 峰号 | 保留时间   | 面积       | 高度     | 化合物名 | 高度%     | 面积%     |
|----|--------|----------|--------|------|---------|---------|
| 1  | 9.650  | 10333021 | 530140 |      | 93.802  | 50.308  |
| 2  | 37.398 | 10206584 | 35026  |      | 6.198   | 49.692  |
| 总计 |        | 20539605 | 565166 |      | 100.000 | 100.000 |

<色谱图>

mAU

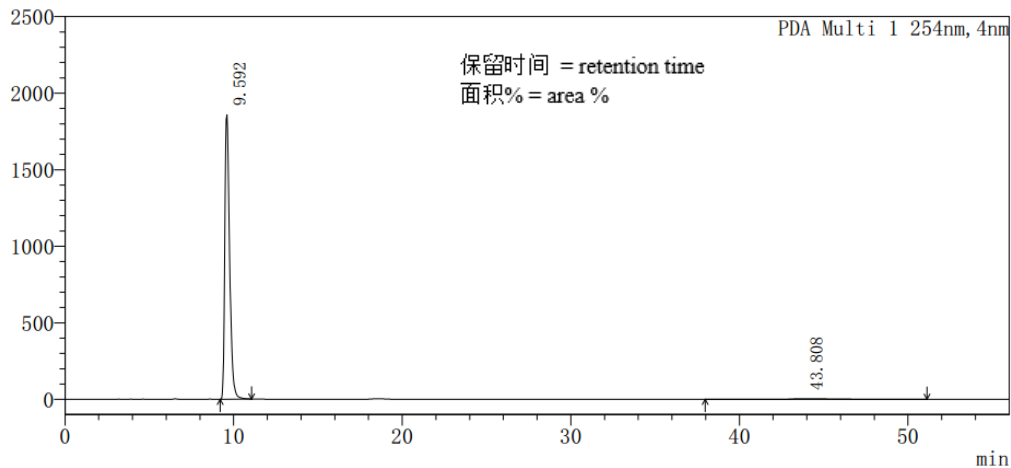

<峰表>

PDA Ch1 254nm

| 峰号 | 保留时间   | 面积       | 高度      | 化合物名 | 高度%     | 面积%     |
|----|--------|----------|---------|------|---------|---------|
| 1  | 9.592  | 36818160 | 1857662 |      | 99.756  | 97.898  |
| 2  | 43.808 | 790640   | 4542    |      | 0.244   | 2.102   |
| 总计 |        | 37608800 | 1862204 |      | 100.000 | 100.000 |

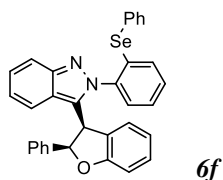

<色谱图>

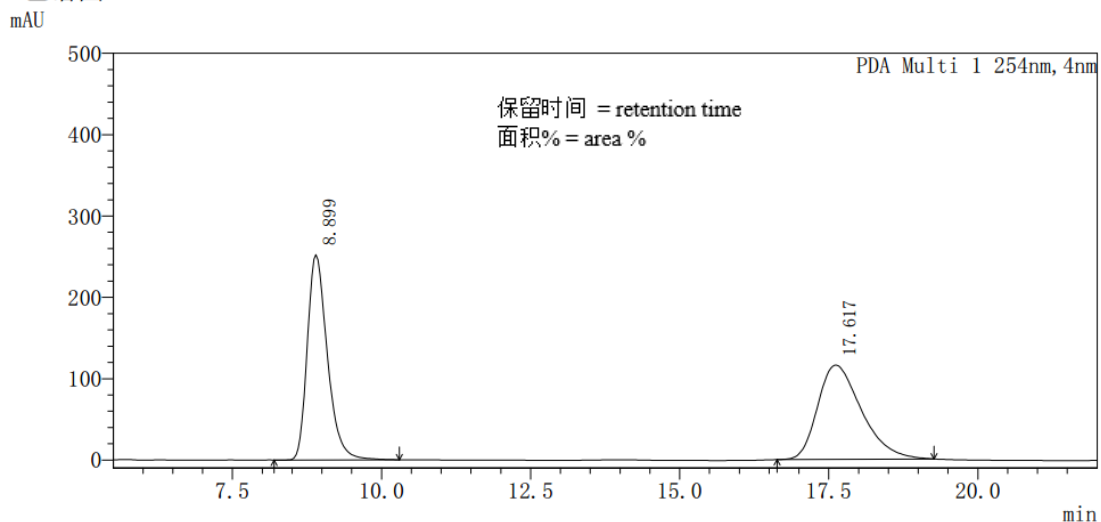

<峰表>

PDA Ch1 254nm

| 峰号 | 保留时间   | 面积       | 高度     | 化合物名 | 高度%     | 面积%     |
|----|--------|----------|--------|------|---------|---------|
| 1  | 8.899  | 5910573  | 252559 |      | 68.552  | 49.968  |
| 2  | 17.617 | 5918076  | 115863 |      | 31.448  | 50.032  |
| 总计 |        | 11828649 | 368422 |      | 100.000 | 100.000 |

<色谱图>

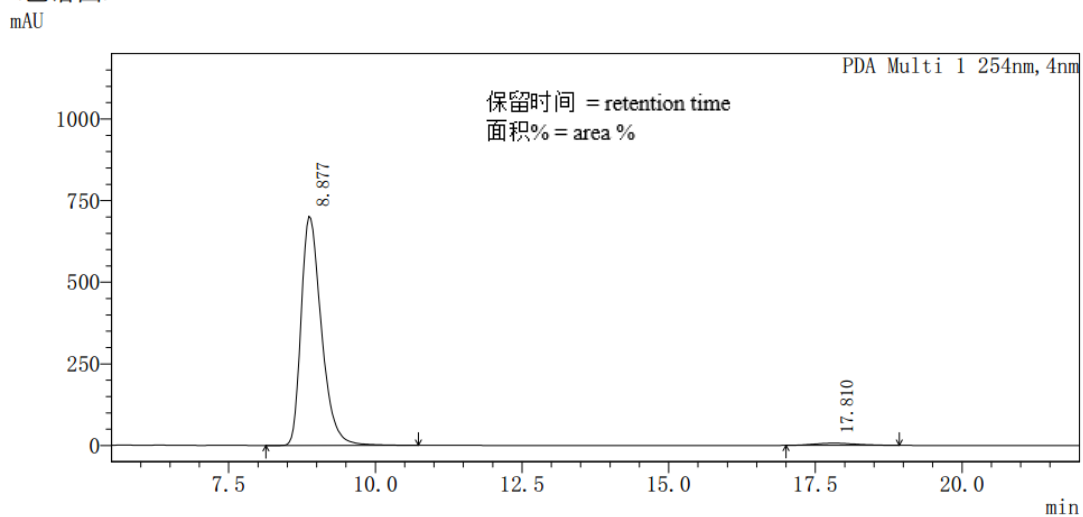

<峰表>

PDA Ch1 254nm

| 峰号 | 保留时间   | 面积       | 高度     | 化合物名 | 高度%     | 面积%     |
|----|--------|----------|--------|------|---------|---------|
| 1  | 8.877  | 16833938 | 701885 |      | 99.059  | 98.031  |
| 2  | 17.810 | 338032   | 6668   |      | 0.941   | 1.969   |
| 总计 |        | 17171970 | 708553 |      | 100.000 | 100.000 |



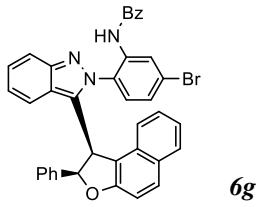

<色谱图>

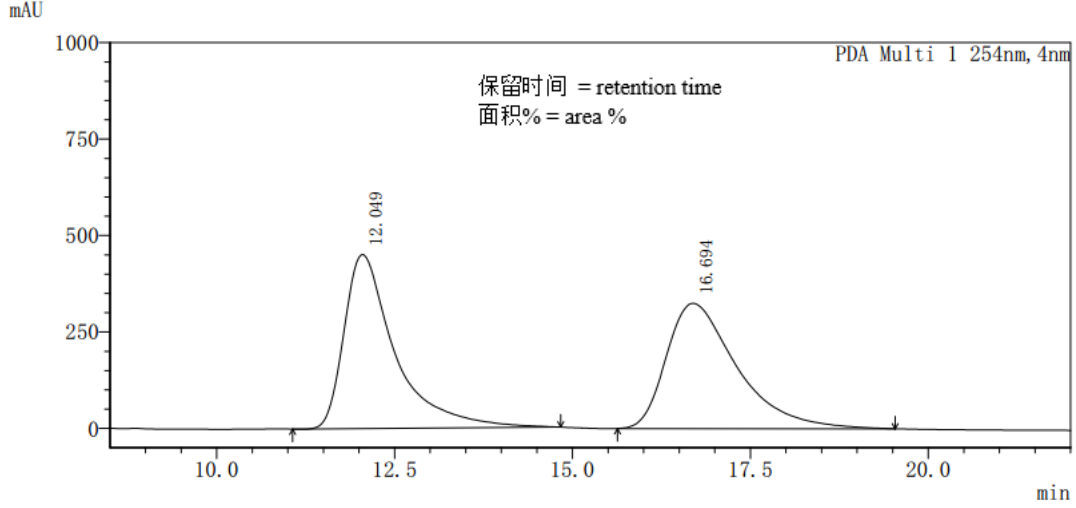

<峰表>

PDA Ch1 254nm

| 峰号 | 保留时间   | 面积       | 高度     | 化合物名 | 高度%     | 面积%     |
|----|--------|----------|--------|------|---------|---------|
| 1  | 12.049 | 22462409 | 450843 |      | 58.127  | 50.057  |
| 2  | 16.694 | 22410940 | 324771 |      | 41.873  | 49.943  |
| 总计 |        | 44873349 | 775615 |      | 100.000 | 100.000 |

<色谱图>

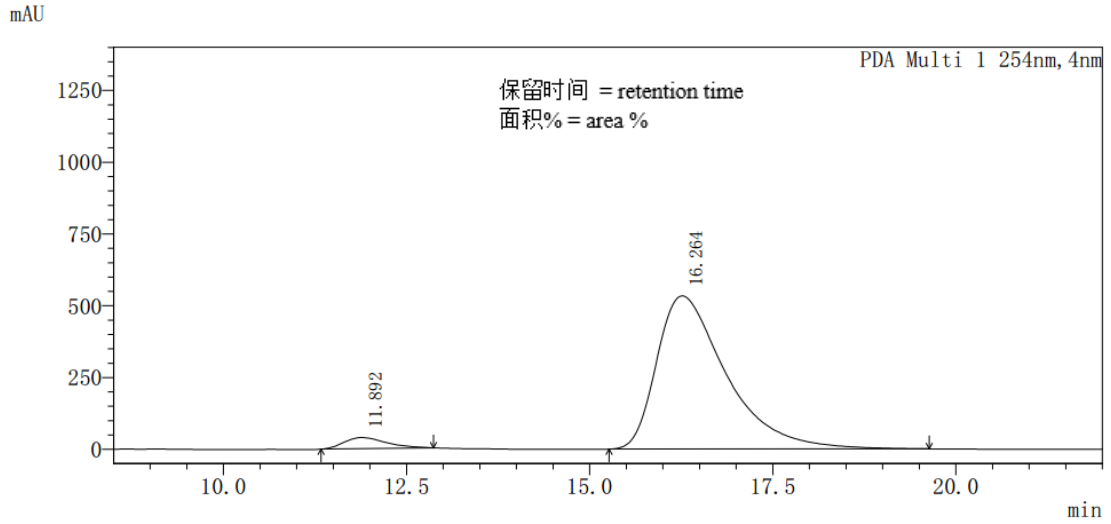

<峰表>

PDA Ch1 254nm

| 峰号 | 保留时间   | 面积       | 高度     | 化合物名 | 高度%     | 面积%     |
|----|--------|----------|--------|------|---------|---------|
| 1  | 11.892 | 1554251  | 38858  |      | 6.783   | 4.222   |
| 2  | 16.264 | 35254891 | 533998 |      | 93.217  | 95.778  |
| 总计 |        | 36809142 | 572856 |      | 100.000 | 100.000 |

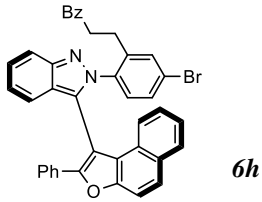

<色谱图>

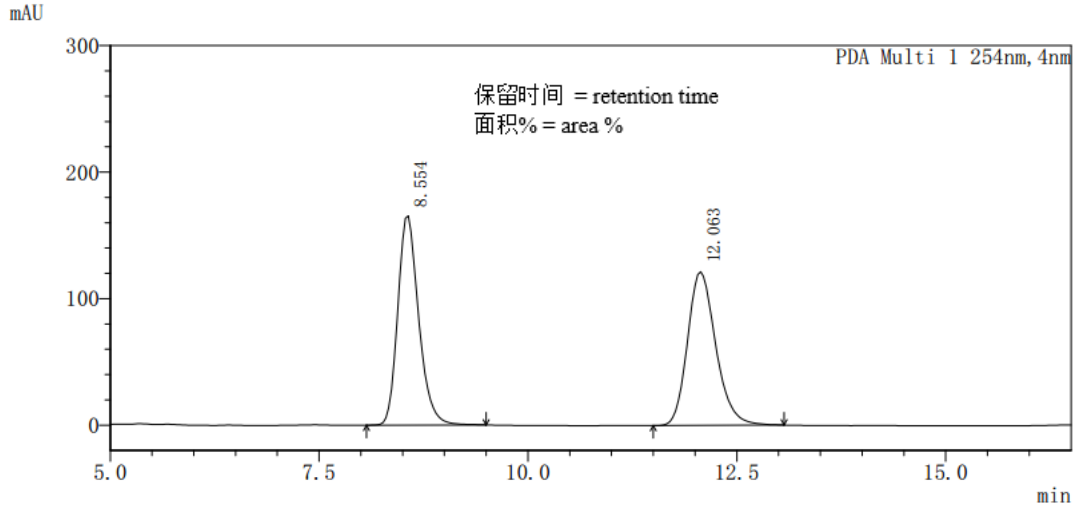

<峰表>

PDA Ch1 254nm

| 峰号 | 保留时间   | 面积      | 高度     | 化合物名 | 高度%     | 面积%     |
|----|--------|---------|--------|------|---------|---------|
| 1  | 8.554  | 2879139 | 165287 |      | 57.635  | 50.174  |
| 2  | 12.063 | 2859155 | 121497 |      | 42.365  | 49.826  |
| 总计 |        | 5738293 | 286784 |      | 100.000 | 100.000 |

<色谱图>

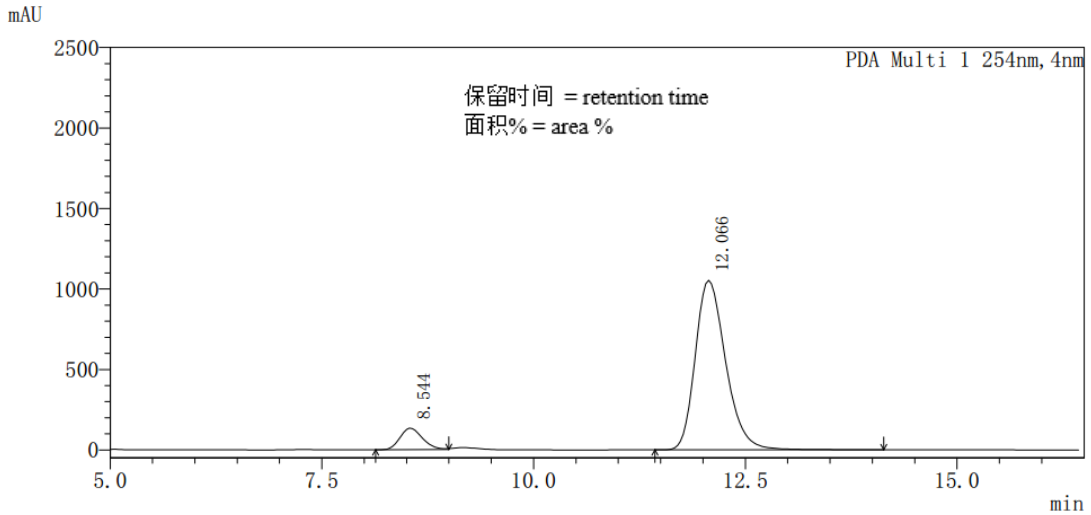

<峰表>

PDA Ch1 254nm

| 峰号 | 保留时间   | 面积       | 高度      | 化合物名 | 高度%     | 面积%     |
|----|--------|----------|---------|------|---------|---------|
| 1  | 8.544  | 2494761  | 133452  |      | 11.241  | 8.659   |
| 2  | 12.066 | 26316935 | 1053705 |      | 88.759  | 91.341  |
| 总计 |        | 28811696 | 1187157 |      | 100.000 | 100.000 |

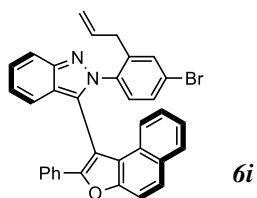

<色谱图>

mAU

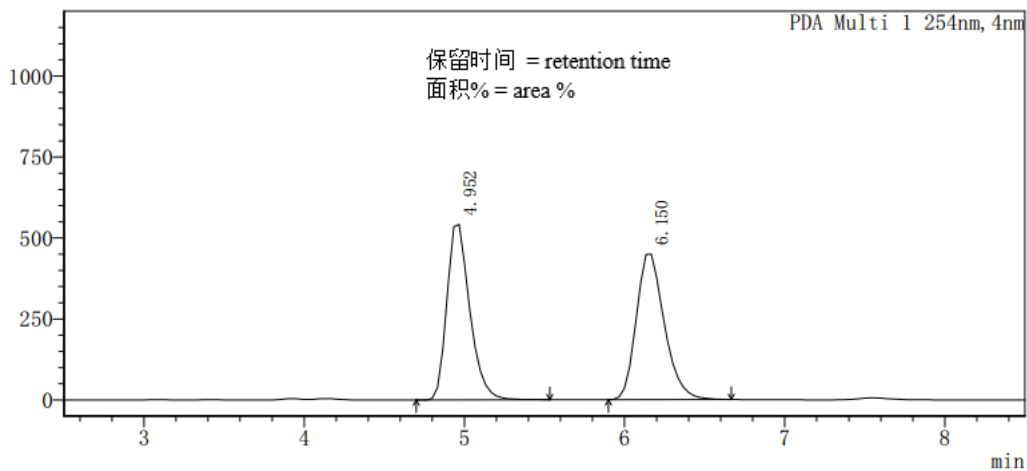

<峰表>

PDA Ch1 254nm

| 峰号 | 保留时间  | 面积       | 高度     | 化合物名 | 高度%     | 面积%     |
|----|-------|----------|--------|------|---------|---------|
| 1  | 4.952 | 5377926  | 541237 |      | 54.707  | 49.607  |
| 2  | 6.150 | 5463058  | 448107 |      | 45.293  | 50.393  |
| 总计 |       | 10840985 | 989343 |      | 100.000 | 100.000 |

<色谱图>

mAU

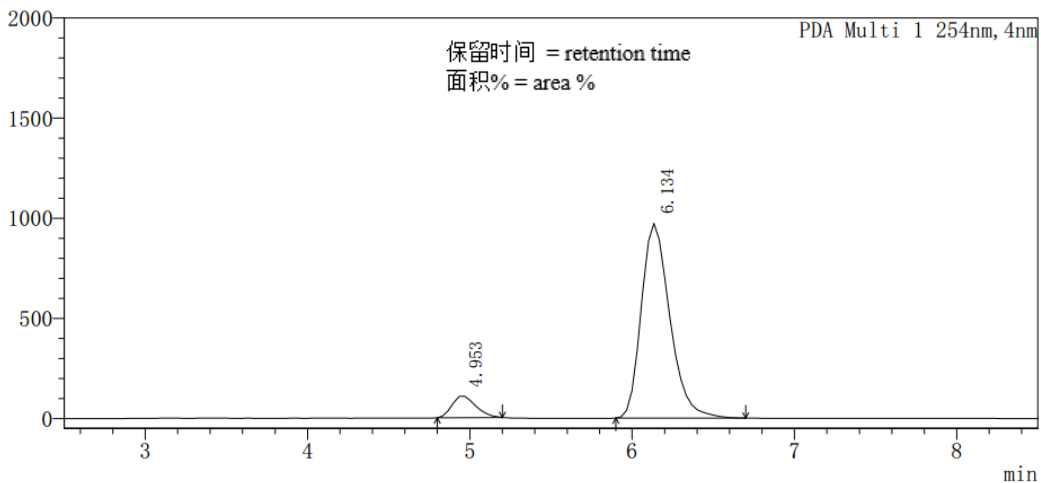

<峰表>

PDA Ch1 254nm

| 峰号 | 保留时间  | 面积       | 高度      | 化合物名 | 高度%     | 面积%     |
|----|-------|----------|---------|------|---------|---------|
| 1  | 4.953 | 1103533  | 108177  |      | 10.010  | 8.516   |
| 2  | 6.134 | 11854932 | 972494  |      | 89.990  | 91.484  |
| 总计 |       | 12958465 | 1080672 |      | 100.000 | 100.000 |
